# Supplementary material for: Epigenetic inheritance of circadian period in clonal cells
Source: eLife. 2020 May 27;9:e54186. doi: 10.7554/eLife.54186 (PMC7289596; doi:10.7554/eLife.54186)
Supplement: Figure 3—source data 1. [file elife-54186-fig3-data1.xlsx]

## Sheet: S1_KD in parent culture
	Target gene	Experiment	Period(hr)	STDEV(hr)	P-value	Amplitude (A.U. ± SD)	Phase Difference (hr)
	Ak3	control	24.9395	0.254487		944 ± 62
		KD	22.9133	0.597547	2.43901e-10	807 ± 137	-1.27 ± 0.70
	Cpa4	control	24.627	0.006245		1196 ± 55
		KD	23.555	0.0759737	0.00156985	1424 ± 47	-0.53 ± 0.19
	Cpeb1	control	25.0807	0.19713		428 ± 26
		KD	26.0357	0.297199	0.000122261	544 ± 36	-0.30 ± 0.38
	Dars	control	24.9767	0.242547		944 ± 62
		KD	26.2766	0.510986	7.39379e-11	1197 ± 113	-0.28 ± 0.30
	Eif4e2	control	24.627	0.006245		1196 ± 55
		KD	24.7613	0.0845123	0.109703	1194 ± 29	1.10 ± 0.22
	Ipo13	control	24.5022	0.181441		1196 ± 55
		KD	26.3194	0.197381	3.81907e-07	893 ± 39	2.21 ± 0.20
	Jun	control	24.6168	0.0900986		432 ± 24
		KD	23.6197	0.188345	6.23091e-06	525 ± 33	0.39 ± 0.44
	Lrrfip1	control	24.6168	0.0900986		432 ± 24
		KD	25.3568	0.228123	0.00021232	610 ± 37	1.00 ± 0.44
	Med23	control	24.6712	0.0499496		900 ± 106
		KD	24.153	0.0474552	4.95561e-09	974 ± 86	0.71 ± 0.15
	Rbfa	control	24.627	0.006245		1196 ± 55
		KD	24.9067	0.0867717	0.0300737	936 ± 24	0.82 ± 0.30
	Rfx5	control	24.7805	0.252115		1196 ± 55
		KD	24.7313	0.208749	0.603008	1174 ± 81	-1.06 ± 0.32
	Slc8a3	control	24.6168	0.0900986		432 ± 24
		KD	23.633	0.237105	5.17688e-05	661 ± 81	0.81 ± 0.56
	Tmem165	control	24.932	0.250407		428 ± 26
		KD	25.4024	0.247405	0.000736718	380 ± 29	-0.71 ± 0.38
	Trim3	control	24.2797	0.327638		1196 ± 55
		KD	23.4369	0.225077	0.000179157	403 ± 25	2.84 ± 0.22

## Sheet: S2_KD in 10 clones
	Clone		Control	Ak3 KD	Cpeb1 KD	Dars KD	Ipo13 KD	Tmem165 KD
	SP#128	Period (hr ± SD)	22.81 ± 0.20	22.03 ± 0.10	25.10 ± 0.07	25.24 ± 0.18	25.07 ± 0.05	25.14 ± 0.18
		P-value		0.057	0.017	0.006	0.022	0.007
	SP#80	Period (hr ± SD)	23.01 ± 0.13	22.18 ± 0.03	25.06 ± 0.21	25.19 ± 0.41	25.44 ± 0.25	25.60 ± 0.16
		P-value		0.044	0.014	0.047	0.015	0.004
	SP#137	Period (hr ± SD)	23.34 ± 0.13	22.37 ± 0.15	25.91 ± 0.12	25.67 ± 0.16	25.91 ± 0.09	25.64 ± 0.21
		P-value		0.021	0.002	0.004	0.003	0.01
	SP#44	Period (hr ± SD)	23.60 ± 0.04	22.88 ± 0.20	26.09 ± 0.15	25.44 ± 0.19	25.09 ± 0.02	24.43 ± 0.21
		P-value		0.082	0.014	0.028	0.001	0.074
	SP#33	Period (hr ± SD)	23.63 ± 0.04	22.55 ± 0.17	26.34 ± 0.51	24.72 ± 0.23	26.25 ± 0.005	25.65 ± 0.17
		P-value		0.041	0.058	0.063	0.005	0.021
	LP#86	Period (hr ± SD)	24.83 ± 0.12	24.03 ± 0.31	26.61 ± 0.16	25.86 ± 0.09	25.44 ± 0.10	26.26 ± 0.04
		P-value		0.1	0.007	0.013	0.034	0.018
	LP#34	Period (hr ± SD)	24.96 ± 0.12	24.55 ± 0.17	25.87 ± 0.10	27.13 ± 0.09	26.46 ± 0.29	26.73 ± 0.17
		P-value		0.102	0.015	0.003	0.042	0.009
	LP#74	Period (hr ± SD)	25.20 ± 0.14	23.08 ± 0.15	25.97 ± 0.04	25.96 ± 0.16	27.00 ± 0.06	26.04 ± 0.04
		P-value		0.005	0.047	0.036	0.014	0.043
	LP#108	Period (hr ± SD)	25.52 ± 0.17	23.72 ± 0.19	26.47 ± 0.18	27.29 ± 0.18	28.42 ± 0.06	26.35 ± 0.24
		P-value		0.01	0.031	0.01	0.01	0.061
	LP#114	Period (hr ± SD)	26.27 ± 0.08	24.38 ± 0.29	27.06 ± 0.14	27.56 ± 0.16	27.79 ± 0.24	28.07 ± 0.001
		P-value		0.039	0.032	0.019	0.036	0.014
