# Supplementary material for: Epigenetic inheritance of circadian period in clonal cells
Source: eLife. 2020 May 27;9:e54186. doi: 10.7554/eLife.54186 (PMC7289596; doi:10.7554/eLife.54186)
Supplement: Figure 4—source data 1. [file elife-54186-fig4-data1.xlsx]

## Sheet: S1_WGCNA Modules
		All Period Correlated DE Genes				Positively Correlated DE Genes				Negatively Correlated DE Genes					blue module						31 modules	black	kWithin	blue	kWithin	brown	kWithin	cyan	kWithin	darkgreen	kWithin	darkgrey	kWithin	darkorange	kWithin	darkred	kWithin	darkturquoise	kWithin	green	kWithin	greenyellow	kWithin	grey60	kWithin	lightcyan	kWithin	lightgreen	kWithin
Module	Gene number in module	Overlapped Genes	P-value	Odds ratio	FDR	Overlapped Genes	P-value	Odds ratio	FDR	Overlapped Genes	P-value	Odds ratio	FDR		cluster 1	cluster 2	cluster 3	cluster 4	cluster 5			Amfr	15.9443	Actr1a	68.4966	Grpr	25.0357	Atp5b	11.0623	Idua	6.78758	Snx12	11.3461	Pcdhgb8	25.8866	Crip2	8.16441	Gng7	17.8338	Elp2	68.2197	Clic4	15.8626	Pbx1	18.9451	Rab3il1	14.4992	Minpp1	21.2497
blue	438	418	2.05657e-171	44.3247	6.37538e-170	418	1.09533e-287	109.276	3.39553e-286	0	1	0	1		Eef1b2	Dcaf13	Cstf2t	Asb1	Adsl			Egln1	14.815	Prdx3	64.0652	Tjp2	24.6378	Serinc1	10.0294	A830010M20Rik	6.42374	Nono	11.208	Pcdhga2	25.8767	Cmklr1	7.61399	Hic1	16.9803	Trappc8	68.1782	Cbr2	15.0027	Hoxa10	17.7032	Cnppd1	14.0834	Lzts2	19.2504
pink	290	274	1.20695e-109	35.7647	1.87077e-108	0	1	0	1	274	9.63983e-205	106.442	2.98835e-203		Eef1d	Ddx18	Ctnnbl1	Btrc	Ak3			Atp6v0d1	14.6277	Htatip2	63.8198	Chst11	24.6091	Hbs1l	9.9825	Bod1l	6.02924	Armcx2	10.3949	Pcdha4-g	25.8732	Zfpm2	7.22883	Fam115c	16.6234	Ammecr1l	67.793	Mcam	11.6932	Thbs2	17.4424	Ccdc91	12.3831	Chd3os	19.1288
red	331	291	5.58541e-96	15.1871	5.77159e-95	1	1	0.0136026	1	290	3.35348e-193	44.2207	5.19789e-192		Eif3a	Exosc1	Hmgn1	Fbxl15	Aldh18a1			Slc25a4	14.4753	Zdhhc6	63.8138	Dgkh	24.5887	Smarcb1	9.91641	Zfp512	5.99154	Rps4x	9.92031	Pcdhga7	25.8704	Cap1	6.91194	Itgb3	16.5929	Hars	66.7893	Six1	11.3137	Lrrc49	17.3551	Zcchc5	12.1712	Peo1	18.2785
green	359	308	2.39165e-95	12.6181	1.85353e-94	308	2.33122e-176	30.3557	3.61339e-175	0	1	0	1		Mrpl15	Nifk	Paf1	Fbxo6	Atic			Tcf25	14.0014	Mrpl43	63.6511	Shc2	24.2854	Metap2	9.8699	Luc7l2	5.84156	Pdha1	9.81196	Pcdhga8	25.8692	Klf2	6.66893	Coa5	16.5655	Ik	66.0336	Osgin2	11.1017	Pcyox1	17.1813	Morc1	10.7444	Nova1	18.0897
salmon	225	218	2.73008e-94	64.8237	1.69265e-93	0	1	0	1	218	7.05139e-170	190.301	7.28643e-169		Mrpl43	Noc3l	Pold4	Klhl21	Ggt7			2310036O22Rik	13.497	Fam160b1	63.2346	Rian	24.0903	Ube2n	9.32109	BC038474	5.36141	Msl3	9.71616	Pcdhgb4	25.868	Pdlim1	6.49922	Hoxa7	15.662	Afg3l2	65.6934	Cpne8	11.086	Pdgfra	15.916	AK039536	10.4978	Ripk3	17.8929
lightgreen	173	167	1.01764e-71	57.583	5.25782e-71	167	1.08732e-116	134.619	8.42674e-116	0	1	0	1		Nacad	Nolc1	Polr2h	Klhl22	Gls			Sf3b3	12.4395	Sfr1	62.9084	DQ267101	23.4434	Vta1	9.25444	Ift172	5.18096	Tmem164	9.01037	Pcdhgc4	25.8641	Prkcdbp	6.34976	Ccl2	15.4171	Ndst1	64.598	Runx3	10.5501	Fam129a	14.2176	AK139999	10.4902	Ephx2	17.2292
turquoise	551	345	2.97819e-45	3.45831	1.31891e-44	345	7.42305e-123	8.41625	7.67048e-122	0	1	0	1		Npm3	Pdcd11	Smndc1	Rbx1	Glud1			Ikbkb	12.2997	Hps1	62.3696	Meg3	22.6976	Sarnp	8.92932	Pappa	5.11145	AK179207	8.52005	Pcdhga12	25.8449	Kif1c	6.01734	Xist	15.0717	Pias2	64.5323	Rassf3	10.4917	Agap1	13.6899	Ppp1r3c	10.4447	Ulbp1	16.9975
darkgreen	138	124	3.67715e-44	18.2137	1.4249e-43	0	1	0	1	124	1.65362e-85	51.9734	1.28155e-84		Rpl12	Pum3	Taf5	Socs2	Impdh1			Ankrd11	12.0307	Slk	62.25	Itga7	22.5212	Lats1	8.26901	AK164124	5.08689	Eif1ax	8.33704	Pcdhgc5	25.8267	Greb1l	5.51467	Ccdc122	15.0576	Rnf14	64.0489	Smim3	10.3162	Ttc17	13.4741	Prkg1	10.2247	Dusp18	16.8589
darkred	144	114	7.16513e-30	7.79408	2.46799e-29	114	4.6149e-58	18.0215	2.38437e-57	0	1	0	1		Rpl24	Rcl1	Tardbp	Spop	Nt5c2			Zc3h18	11.9585	Hif1an	61.7526	Aff4	22.0186	Gap43	8.17124	Zfp644	5.08545	Eif2s3x	8.27775	Pcdhga9	25.8145	Gcnt1	5.47864	Adh1	14.6985	Epc1	63.8839	Klf12	10.1012	Vps26b	13.2069	Mettl13	9.29823	Cbr1	16.3348
white	119	99	1.84699e-29	10.1443	5.72568e-29	0	1	0	1	99	1.90252e-61	28.755	1.17956e-60		Rpl3	Rrp12		Sufu	Ntpcr			Nip7	11.9502	Pdzd8	60.4529	Ppm1e	21.7107	Herc4	8.02058	Polr2b	5.04233	Psmd10	8.03337	Pcdhga10	25.3155	Pxdc1	5.42665	Pde8b	14.4206	Csnk1g3	63.4736	Cspg4	9.9186	Rhobtb1	12.9639	Il1rl2	8.98539	Chrdl1	15.9835
midnightblue	195	140	2.10559e-28	5.22207	5.93393e-28	140	1.55513e-61	12.1442	9.6418e-61	0	1	0	1		Rpl30	Rrp15		Wwp1	Pcx			Whsc1l1	11.912	Shoc2	60.2136	Plag1	19.5135	Cand1	7.91648	Pigg	4.83263	Atrx	8.01563	Pcdhga3	25.2612	Adamts1	5.00239	Pyroxd2	14.217	Dctn4	63.3203	Aqp5	9.84692	Pde1a	12.9223	Aamp	8.64341	Cpeb1	15.6943
lightcyan	189	115	4.80222e-15	3.17438	1.24057e-14	115	1.23924e-39	7.34872	5.48806e-39	0	1	0	1		Rpl31	Rrs1			Pnp			Fam32a	11.6442	Cdc37l1	60.0821	Cd164	19.5087	Ap3d1	7.72363	Pyroxd1	4.82927	Fam50a	7.88624	Pcdhgb2	25.258	Aurkaip1	4.60967	Nhsl2	13.6249	Ube2d2a	63.2152	Slc29a1	9.62924	Ptplad1	12.5939	Tmem185b	8.60214	Cercam	15.4336
magenta	290	148	2.34568e-10	2.12204	5.59355e-10	148	5.68104e-38	4.95063	2.2014e-37	0	1	0	1		Rpl35a	Trub1			Ptges2			Ap1g1	11.3984	R3hcc1l	59.6045	Canx	19.5087	Ccdc6	7.6983	Med13l	4.71415	Ogt	7.79062	Pcdhga5	25.001	Ptp4a3	4.49807	Nmnat3	13.3749	3110002H16Rik	63.0349	Emp2	9.55841	Mgst1	12.423	Fam20b	8.56689	Ide	15.041
skyblue	117	63	2.80741e-06	2.37529	6.21641e-06	0	1	0	1	63	2.15582e-22	6.67343	1.11384e-21		Rpl7	Wdr12			Ptp4a1			Rab8a	11.331	Cacul1	59.3195	Osr1	19.2589	Tbpl1	7.37455	Fam13c	4.56632	Myo9a	7.48876	Pcdhgb7	24.8857	Map6	4.36536	Mira	13.3706	Ankhd1	62.0044	Ctgf	9.53043	Mras	12.1147	Acacb	8.49423	Igfbp6	14.7183
royalblue	148	69	0.00041303	1.77509	0.000853595	69	7.76493e-16	4.07361	2.67459e-15	0	1	0	1		Rpl7a				Vat1			Tnpo2	11.3289	Atad1	58.9316	Rev3l	19.178	Hhipl1	7.15556	1700028K03Rik	4.55547	Tmsb15l	7.48027	Pcdhgb6	24.7368	Cct5	4.26757	Wdr26	13.3471	Fbxo38	60.0183	Edil3	9.46309	Bace2	11.9943	Traf3ip1	8.28306	Chuk	14.7128
darkgrey	135	62	0.00124719	1.72589	0.00241643	62	5.24096e-14	3.95507	1.6247e-13	0	1	0	1		Rps21							Cog8	11.2063	Pi4k2a	58.3834	Raet1e	19.1706	Usp15	7.03269	Slc30a9	4.54127	Syap1	7.39195	Pcdhga1	24.7093	Cldn1	4.218	Zfp558	13.2062	Cul2	59.1198	Mtap	9.22135	Tdrp	11.9901	Slc44a2	8.22647	Got1	14.69
darkturquoise	137	61	0.00333545	1.63039	0.0060823	61	4.60199e-13	3.73574	1.18885e-12	0	1	0	1									Leprotl1	11.1671	Vti1a	57.8421	Pvr	19.0555	Cdk17	6.85317	Fgd6	4.53853	Kdm6a	7.29463	Pcdhga4	24.6415	Ccnd1	3.92304	Apba1	13.0084	Riok3	59.067	Fat1	9.18707	Eda	11.9836	Ctsk	8.14434	Cwf19l1	14.6653
black	303	108	0.196082	1.11726	0.337696	108	1.11982e-13	2.58866	3.15585e-13	0	1	0	1		*Red: Period correlated DE genes.							Col4a1	11.0944	Fam45a	57.7411	Galnt16	18.9416	Ranbp2	6.8258	Igsf10	4.52996	Adam10	7.26785	Pcdhga6	24.6113	Gtf2f2	3.77424	Twist2	12.7428	Rab18	58.976	Epb4.1l2	9.09135	Crot	11.8419	Zfp385a	7.88297	Xpnpep1	14.474
cyan	218	67	0.793475	0.895304	1	0	1	0	1	67	4.08797e-09	2.52319	1.81039e-08									Mfhas1	10.8	Marveld1	56.7049	Tmtc2	18.8915	Supv3l1	6.68506	Pkd2	4.52133	Tmsb15b2	7.24986	Pcdhgc3	23.6656	Rps6	3.76869	Vcan	12.7102	Hdac3	57.2455	Plekhg5	9.0126	Rybp	11.6187	Tgfbi	7.79985	Map3k7cl	14.1151
darkorange	127	36	0.890525	0.800473	1	34	0.00816414	1.68633	0.0194683	2	1	0.0891043	1									Fam192a	10.5415	AK046873	56.2536	Iglon5	18.8476	Csnk1g2	6.66277	Zfp932	4.3844	A830080D01Rik	7.18233	Pcdhgb5	23.4198	Bcl2l1	3.76641	Lmbr1	12.6248	Kdm3b	56.6312	Arhgef19	8.44269	Jam3	11.5868	Tor1aip2	7.69201	Hspa12a	13.9199
tan	237	57	0.999111	0.63653	1	0	1	0	1	57	0.000201705	1.79036	0.000694761									Gnpat	10.4427	Cox15	55.6646	Raet1c	18.5712	Trappc10	6.64177	6030458C11Rik	4.21329	Sod1	6.982	Pcdhgb1	23.2278	Myadm	3.43342	Stxbp4	12.3344	Txnl4a	56.5749	Pstpip2	8.08782	AK035037	11.5724	AK047931	7.687	Atrnl1	13.6933
lightyellow	161	34	0.999708	0.539702	1	1	1	0.028395	1	33	0.0402898	1.45101	0.113544									Zdhhc7	10.3832	Noc3l	55.1857	Rufy1	18.5585	Uhrf1bp1l	6.46588	Zcchc4	4.13793	Hnrnph2	6.91801	Pcdhga11	22.188	Fads3	3.4204	Panx1	12.2064	Atp9b	56.2824	Dlc1	8.06572	5530601H04Rik	11.4888	Dstyk	7.68279	Tmem173	13.157
brown	431	104	0.999987	0.633007	1	4	1	0.0417228	1	100	6.12815e-06	1.71468	2.37466e-05									Dnajb1	10.3777	Rab11fip2	54.7567	Fnip2	18.2716	Atp5d	6.40471	Zgrf1	4.04799	Bahd1	6.77939	Pcdha12	11.6869	Tfg	3.36844	St3gal1	12.1498	Kif5b	56.1673	Vcl	8.02062	Desi2	11.4773	C1ra	7.61651	Kctd4	12.9775
purple	269	55	0.999999	0.514797	1	2	1	0.0337751	1	53	0.0251181	1.38148	0.0778662									Cfdp1	10.3303	March5	54.2963	Trim26	18.2715	Sec63	6.26309	5031425E22Rik	3.9821	Apool	6.68088	Pcdha3	11.6255	Cab39l	3.36681	Tmem131	11.85	Diap1	55.9273	AK184946	7.95076	Mmgt2	11.339	Zfp518b	7.58539	Plch1	12.6287
orange	133	19	1	0.335925	1	8	0.999985	0.292328	1	11	0.993805	0.503807	1									Tmem66	10.2337	Ak3	54.2476	Slc8a1	18.0651	Hdac2	6.13622	Ugdh	3.94844	Znrf2	6.37804	Pcdha8	11.6008	Pnmal2	3.32709	Ccl7	11.6089	Mtpap	55.8127	Aim1	7.91883	Dhx40	11.3021	Ikbke	7.57034	Mlh3	12.6083
paleturquoise	108	13	1	0.276167	1	2	1	0.0861673	1	11	0.948326	0.634856	1									Ddx49	10.0987	Sufu	54.217	Farp1	17.5244	Ipo13	6.04399	Myo1b	3.89401	Pin4	6.27147	Pcdha1	11.6005	Snta1	3.29733	Dnpep	10.8829	Apc	55.7806	Plk2	7.78225	Nfe2l2	11.2828	Kdm5b	7.47525	Gm340	12.3256
steelblue	108	11	1	0.228796	1	10	0.996011	0.467342	1	1	1	0.0521004	1									Ppp2cb	10.0845	Nfkb2	52.9206	Tnik	17.2373	Sirt1	5.9767	Ptgs2os	3.86726	Chm	6.26919	Pcdhac2	11.5939	Lonp2	3.18054	Emc9	10.7944	Slc25a46	55.2895	Sytl2	7.61011	BC003348	11.0216	Glb1l	7.39237	Pcdhb7	12.19
saddlebrown	113	7	1	0.133046	1	4	0.999999	0.167645	1	3	0.999998	0.152108	1									Champ1	10.0338	Zfyve27	51.885	Hspa4	17.2049	Tbc1d15	5.93847	AK049668	3.83893	2610002M06Rik	6.20998	Pcdha5	11.5771	Mpdz	3.102	Dcaf8	10.5192	AK080083	55.0197	Trappc3	7.47395	Trp53bp1	11.0043	Fam189b	7.16653	Hspd1	12.0901
greenyellow	240	32	1	0.30765	1	3	1	0.0572282	1	29	0.925891	0.767577	1									Fkbp8	9.85724	Eif3a	51.4355	Srxn1	17.1659	Oaz1	5.93544	Ift80	3.82514	Fundc2	6.04713	Pcdha6	11.5666	Vgll3	3.09752	Manba	10.4227	Ss18	54.9475	Nacc2	7.46862	Ftx	10.6588	Abca9	7.02231	Ptprq	11.8776
yellow	398	60	1	0.351413	1	31	1	0.380904	1	29	1	0.433582	1									Dda1	9.75012	C030046E11Rik	50.8355	Dkk2	17.1014	Tbk1	5.91	Ipo8	3.79812	5031439G07Rik	6.02523	Pcdha7	11.5236	5330426P16Rik	3.08707	Rsph9	10.4158	Smad4	54.6392	Jag1	7.46658	Mmp19	10.6547	Il1r1	6.90089	Eif4e2	11.559
grey60	174	10	1	0.122194	1	10	0.999999	0.277813	1	0	1	0	1									Sprtn	9.64469	Mgea5	50.3554	Inpp5a	16.9992	Katna1	5.87318	Uvssa	3.7563	Snx1	5.75901	Pcdha10	11.3964	Eif3d	3.01124	Pla2g4a	10.4094	Smad2	54.527	Myl6	7.42968	Acad8	10.613	Elmo2	6.7035	Ctsf	11.5462
																						Tubgcp3	9.6292	Fam178a	50.0102	Gdpd1	16.9711	Krr1	5.80826	Vamp1	3.72496	Mospd2	5.65234	Pcdha9	9.56227	Rnaseh2a	2.95032	Rgag4	10.0583	Atp5a1	53.6525	Faf1	7.42743	Cnrip1	10.5199	Aldh3b1	6.69989	Bst2	11.2265
																						Cirh1a	9.62008	9930021J03Rik	49.206	Gpi1	16.9588	Akap7	5.78931	2410089E03Rik	3.64402	Tbc1d2b	5.53542	Snx24	9.36153	Ahnak	2.95007	Slco3a1	10.0205	Epb4.1l4a	53.6432	Sspn	7.37045	Prss35	10.3467	Gm1821	6.52207	Msl3l2	11.1934
																						AK215907	9.61188	Usmg5	49.085	Crabp1	16.911	Zufsp	5.60536	Spag1	3.61937	Arhgap1	5.44734	Gnpda1	8.9819	Arpc4	2.88851	Unc93b1	9.74032	Wac	52.4717	Pdp1	7.15001	Armcx1	10.2398	Map3k12	6.48674	Foxred2	10.905
																						Wwc2	9.48226	Ldb1	48.7446	Xylb	16.9025	Ppil4	5.55846	Dr1	3.54857	Ctps2	5.40651	Zeb1	8.0111	Pak2	2.85265	Fam189a2	9.69402	Zfp191	52.1934	Nexn	7.00196	Mir7025	10.0008	Cpeb3	6.47077	Ipo4	10.8676
																						Lsm1	9.43463	Btaf1	48.7065	Traf3ip2	16.6133	Elk3	5.55414	2210408I21Rik	3.49313	Rpl10	5.31357	mmu-mir-155*	6.41204	Cd274	2.84362	Fam213a	9.59791	Dcp2	51.3784	Itpr2	6.98537	Dpy19l3	9.8503	Sfxn4	6.35026	Actn3	10.7118
																						Nup93	9.38586	Wbp1l	48.4695	Stxbp5	16.4783	Rnf146	5.52808	Spata1	3.4035	Hdac8	5.2462	Itgb2	6.19853	Nr2c2ap	2.77183	Tcn2	9.52355	Etf1	51.2249	Tnfrsf25	6.90857	Fam214a	9.80368	Abcb6	6.28576	Ctsz	10.4827
																						BC056474	9.32379	Lipa	48.1565	Gabbr1	16.4524	Mcm3ap	5.51913	Ankle2	3.36695	Rbbp7	5.22586	Rarb	6.05552	Gm16793	2.77137	Pde4b	9.42329	Fech	50.9179	Peg10	6.89298	Ovgp1	9.74609	Ccl27a	6.27367	Arhgap6	10.3346
																						Cog4	9.22051	Nolc1	47.9164	Cdh11	16.2495	Med16	5.29931	AK080173	3.3658	Morf4l2	5.14026	Adora2b	5.83948	Msrb1	2.71074	Nrn1	9.4021	Ccny	50.5545	Cav2	6.81019	Irf1	9.6958	C3	6.12131	Tusc1	10.0487
																						Hgsnat	9.20579	Hspb1	47.9108	Arpc1a	16.1397	Pex7	5.28011	Lyrm2	3.34842	Smc1a	5.08645	Nr2f1	5.75696	Car13	2.66672	Cnot8	9.35718	Rbm27	50.3761	Carns1	6.79907	Stk17b	9.68711	Cped1	6.11243	Rfx3	9.96874
																						Slc7a5	9.14107	D19Bwg1357e	47.7146	Rhoq	16.1091	Tfam	5.23658	Kmt2e	3.26888	Cln6	5.06235	Sipa1	5.73267	Id1	2.61963	Dfna5	9.35406	Wdr7	50.1893	Mecom	6.7558	Ttl	9.65044	Pltp	6.09523	Tle3	9.93455
																						Abce1	9.13415	Ndufb8	47.4267	Cd109	16.0721	Zfp280b	5.19414	Mylk	3.07417	Nipa1	4.99346	BC086315	5.21217	P2rx3	2.5934	Fuom	9.16664	Dmxl1	49.7333	Cables1	6.74538	Ubxn4	9.59713	2700046G09Rik	6.06697	Wdr81	9.73766
																						Chtf8	9.08273	Arl3	47.3977	Zfp53	15.9586	Lrrc15	5.19388	AK042126	2.98295	Herpud2	4.89479	AK086749	5.16169	Rras	2.53666	Rnf24	8.96619	Ap3s1	48.873	Ptchd4	6.6944	Slc25a36	9.49525	Ankzf1	6.01332	Triobp	9.73701
																						Ist1	9.05387	Tm9sf3	47.2593	Mir1906-1	15.9541	Tcra	5.185	Pfkfb4	2.96802	Il6ra	4.89373	AK032382	4.97447	Rsu1	2.4865	Zfp456	8.94281	Hdhd2	48.8241	Map2	6.66838	Tgfbrap1	9.45279	Rgl1	5.96894	Xlr3b	9.49292
																						Exoc8	8.92177	Sh3pxd2a	47.222	Hlf	15.9131	Ado	5.14933	Wdr19	2.96039	Cox7b	4.71657	Dhrs1	4.91415	Psme2b	2.48177	Galnt18	8.91252	Mbd2	48.783	Wwp2	6.60529	Parp1	9.40713	2010015L04Rik	5.96024	Crispld2	9.13586
																						Dctn6	8.89183	Smc3	47.0732	Adipor2	15.8186	Pdss2	5.14424	Mtx3	2.9342	Atp7a	4.70907	Gata6	4.65325	Mir6367	2.47305	Lgals9	8.80566	Mib1	48.7769	Hoxa1	6.42428	Zdhhc20	9.37434	Ogn	5.93838	Cdc42bpg	9.04918
																						Smim19	8.89143	Cuedc2	46.4342	Ppp1cc	15.7959	Ccar1	5.07996	Rnf34	2.87608	Armcx3	4.70379	F730043M19Rik	4.48681	Capg	2.45775	4930500J02Rik	8.69118	Commd10	48.1401	Taf12	6.38339	Mapkbp1	9.15728	Clk1	5.93385	Rps5	9.03523
																						Kat6a	8.88636	Asah2	46.249	Nipsnap1	15.5776	TCR-alphachain	4.90888	Nupl2	2.84738	Htatsf1	4.698	2700081O15Rik	4.20202	Fkbp1a	2.44004	BC033430	8.62251	Rbm22	48.0096	Msrb3	6.33918	Steap3	9.10621	Mib2	5.92278	Nkain2	8.76988
																						Ash2l	8.86754	DQ710893	45.9836	Srsf7	15.5516	Med23	4.84489	Nub1	2.76729	Tmsb15b1	4.6681	Malt1	4.11059	Ap1m1	2.37828	Tanc2	8.57019	Atg12	47.9682	Acox2	6.33584	Fbn1	8.9829	Efhc1	5.91695	Atp6v1e1	8.76882
																						Gpt2	8.72756	Afap1l2	45.4188	Dis3l	15.1207	Fam207a	4.75785	Rfc1	2.71767	Lpgat1	4.61599	Bmp1	4.00727	Rpl13	2.37764	Slc39a8	8.39548	Napg	47.9523	Hoxa2	6.30694	Pfkfb3	8.94869	D2hgdh	5.90727	C330018D20Rik	8.74889
																						Hmox1	8.72411	Itprip	44.9547	Adamts14	15.0173	Ndufa12	4.74891	Foxp1	2.71608	Secisbp2l	4.57769	Gypc	3.90298	Osbpl11	2.36342	Naprt1	8.27295	Fam210a	47.5134	Zfhx3	6.23172	Tmed4	8.64985	Ank1	5.83977	Sgsh	8.3779
																						Polr2c	8.69745	Rcl1	44.8033	Olfml2b	15.0088	Adcy7	4.70686	Akap2	2.71087	1600014C10Rik	4.53186	Ptchd1	3.87168	Nudc	2.29676	AK149307	8.20564	Wdr33	47.4802	Prdx1	6.12786	Irak1bp1	8.60737	Piwil2	5.77676	1700010I14Rik	8.14397
																						Cox4i1	8.67483	Slc25a28	44.3596	AI839979	14.8111	2510003E04Rik	4.61135	Rab28	2.68379	Trmt2b	4.50586	Ltbp3	3.80449	Tnc	2.29308	Cnot11	8.12296	Hsd17b4	47.1603	Fhl3	6.09696	Zfp467	8.50567	Atg4b	5.75965	Trnp1	8.11116
																						Map1lc3b	8.67028	Obfc1	44.3287	Vwa8	14.7561	Ralgapa1	4.59056	Mrpl1	2.60777	Alg13	4.38005	Dtx4	3.62087	9930111J21Rik1	2.27722	Arap1	7.84914	Seh1l	47.1219	Emp1	6.09559	Eng	8.22701	Ccdc65	5.72186	Tctn3	8.06923
																						Carkd	8.66554	Mxi1	44.0063	Myl12b	14.7359	Fez1	4.51081	8430419L09Rik	2.59372	Magt1	4.32974	Itgb7	3.47243	Acvr2a	2.24468	Olfml2a	7.82676	Psmg2	46.939	Hs6st2	6.05224	Tbc1d16	8.11224	Chst12	5.7043	Cnnm2	8.05481
																						Slc7a6os	8.62922	Pdcd11	43.8549	Gpnmb	14.6287	Mbd3	4.49667	Apbb2	2.5269	Insc	4.31882	Stk4	3.29228	Anxa11	2.22284	Usp40	7.78271	Sra1	46.7921	Cnn2	6.034	4922501C03Rik	8.07319	P2rx4	5.69693	Add3	7.98559
																						Eif4ebp1	8.61771	Tbc1d12	43.4952	Nsg2	14.6216	Scamp4	4.49271	Sfswap	2.47073	Amotl1	4.21746	Yeats2	3.18441	Trim35	2.21343	Mmp9	7.77607	Cep76	46.7161	Tmem171	5.99508	Magohb	8.05037	Rnf25	5.68835	AK080222	7.86362
																						Ccdc102a	8.55897	Ranbp6	42.1025	Mfap3l	14.5074	Cdc40	4.44087	Clock	2.39144	Mpp1	4.21118	Tns1	3.04465	Dctn1	2.21245	Sox12	7.76184	Hspa9	46.4602	Dlx5	5.87789	Pitpnc1	8.01914	P4ha2	5.67642	Chmp2a	7.73459
																						Rad23a	8.54066	9130011E15Rik	41.5655	Spock3	14.3278	Sgta	4.32767	Nup155	2.38767	Lage3	4.14284	Cst6	2.97659	Ric8	2.20103	Tgif2	7.72262	Thoc1	46.315	Ppp1r13b	5.68156	Creg1	8.01799	Tmem59	5.6549	Zfp772	7.72546
																						Gins4	8.52803	Sfxn3	41.431	Sgpl1	14.2637	Ddx50	4.29304	Nup54	2.3009	S1pr2	4.05247	Tgoln1	2.95195	Entpd2	2.1133	Gpam	7.6271	Ercc3	46.1408	Klhdc8a	5.6006	Magi2	7.87796	Htr1b	5.20702	Pnpla7	7.64557
																						Col4a2	8.50105	Papss2	41.1274	Lbh	14.2402	Atg5	4.14727	Cnp	2.25175	Bcap31	4.00811	Mta2	2.81443	Atp6v1c1	2.11219	Edem3	7.55561	Tmed7	46.0437	Cnksr3	5.55873	Prrc2c	7.87731	Fam168b	5.14614	Cacnb3	7.64054
																						Glt25d1	8.39618	Grk5	40.9647	Rgs20	14.1368	A830082N09Rik	4.14259	Ddx39b	2.19742	Ubqln2	3.97647	Pcdhb15	2.77649	Colec12	2.10583	Pikfyve	7.49211	Zfp397	46.0341	Gadd45b	5.54823	Bach1	7.70813	Adhfe1	5.04182	Calml4	7.37913
																						Nfatc3	8.38984	Il10rb	40.9637	Fah	14.063	Ascc3	4.142	2310033P09Rik	2.18649	Lactb	3.96881	Exoc3l	2.77052	Rps8	2.09337	Igdcc4	7.27206	Epg5	45.8672	Abcc1	5.54432	Stard10	7.68165	Sdhc	5.02235	Pnp2	7.32033
																						Agpat5	8.32949	Cstf2t	40.5209	Klf9	14.0411	Uqcr11	4.13922	Tmem161b	2.18647	Mmgt1	3.96257	Lrp4	2.73996	Pacs2	2.06753	E330013P04Rik	7.22604	Map3k2	45.8058	Asun	5.53024	Ginm1	7.37757	Trak2	5.00374	Alkbh5	7.12021
																						Vdac3	8.22074	A630007B06Rik	40.4301	Agpat3	14.013	Rwdd1	3.97335	Pick1	2.09264	Dkk3	3.90835	Rcor2	2.73031	Ndufb9	1.99997	Bhlhe22	7.03416	AK040485	45.6966	Wnk1	5.49242	Rnf216	7.07255	C1s	4.99233	Kdm5c	7.09941
																						Tm2d2	8.18323	Lcor	40.1736	Samd10	13.7736	Ormdl2	3.96729	Zcchc11	2.06329	Pde10a	3.8877	Scd1	2.70431	Mical1	1.99104	Coro6	6.94937	Zfp35	45.5796	Smtn	5.44092	Rbmx	7.02543	AK145129	4.96995	Fibp	6.84096
																						Mak16	8.15237	Erlin1	40.164	Ddhd1	13.7302	Cfl2	3.92317	Zdhhc21	2.03581	F8a	3.83639	Ganab	2.65618	Sdcbp	1.98903	AK046417	6.91341	Wdr36	45.5662	Kpna6	5.43189	Thtpa	6.92093	Odf2	4.92141	Rmdn2	6.78283
																						Myo9b	8.10656	Sfxn2	39.9358	Kdr	13.4586	Snrpd3	3.86545	AK015545	2.01746	Map1a	3.78673	Efna2	2.64318	Id3	1.95412	Bfar	6.68101	Srfbp1	45.4702	Aebp2	5.40088	Xpr1	6.76907	Itm2c	4.857	Il4ra	6.69169
																						Rnf181	8.08386	Sptbn1	39.6543	Cript	13.4387	Cnot2	3.8365	Kirrel3	2.01293	Zfp704	3.76527	Naglu	2.57947	Cdh2	1.9268	Cyp7b1	6.63468	BC029331	44.6484	1190005I06Rik	5.36774	G6pdx	6.71225	Loxl3	4.85313	Jup	6.52251
																						Vps36	7.95125	St13	39.5987	Moxd1	13.4259	Nuak1	3.82854	Lias	1.9864	Ikbkg	3.7101	Acaa2	2.57156	Nsmce2	1.92041	Efemp2	6.61726	0610009O20Rik	44.6427	Rsc1a1	5.36007	Sestd1	6.6097	Per1	4.83566	C1qtnf3	6.38933
																						Smim7	7.9466	Trub1	39.5631	Cyba	13.397	Wdr18	3.81801	Supt7l	1.97487	Mbtps2	3.67429	Fibin	2.53515	Clta	1.901	Oasl2	6.59024	Ythdc2	44.1367	Eps15	5.35983	Gigyf2	6.5404	Trafd1	4.80292	Fam135b	6.34651
																						Tom1	7.88753	Dclre1a	39.5385	Zxdc	13.2618	Asf1a	3.81086	Strada	1.97249	Vps13c	3.66641	Tnk2	2.46173	Gabarapl2	1.88539	Ndufs2	6.52723	Snx2	44.0403	Lphn3	5.35087	Zfp128	6.43009	Slc4a3	4.77453	Cluh	6.31764
																						Farsa	7.78594	Smndc1	38.9052	Kpna3	13.0718	Rexo1	3.7965	Sepsecs	1.96097	Sh3bgrl	3.65622	Ccdc50	2.4552	Cc2d1a	1.82099	Kdsr	6.1697	Eif4ebp3	43.8567	Nr4a2	5.34497	Esr1	6.24689	B430203M17Rik	4.73213	Ncoa3	6.29854
																						4921524J17Rik	7.74718	Pcgf6	38.8606	Gng2	12.9874	Lpar1	3.78977	Hmgn2	1.94634	Mospd1	3.55927	Mmp14	2.28893	Cyp4v3	1.76592	Prickle2	5.96535	Nars	43.8244	Akr1a1	5.26369	Fam69b	6.22384	8430427H17Rik	4.67492	Pde5a	6.23797
																						Gse1	7.74494	Dars	38.5713	Ahsa2	12.9601	Ipmk	3.78427	Ppp1r10	1.94225	Nkain1	3.52921	Mgme1	2.22642	Med8	1.75343	Clasp1	5.96029	AB351190	43.7898	Usp2	5.26123	Nkap	6.13655	Ing5	4.52628	Zfp954	6.20953
																						Arhgef7	7.73101	Plscr4	38.0741	Gnb5	12.934	Cct2	3.73591	Tmem33	1.93958	Cd99l2	3.45755	Igf2bp1	2.10758	Pqlc3	1.75043	Sema4g	5.72842	Ctif	43.7822	BC008224	5.25301	Bckdhb	6.09449	Phldb2	4.45244	Srbd1	6.12181
																						Vps35	7.72046	Emx2	37.9758	Ostm1	12.792	Hsf2	3.72764	Btbd8	1.89694	Plcxd2	3.44612	Fndc1	2.08732	Ak4	1.71082	Xpnpep2	5.66919	Zmat2	43.1855	Utrn	5.24519	Arrdc3	5.82424	Ager	4.41468	B4galt5	6.05796
																						Vac14	7.70868	Klhl22	37.8513	Grik5	12.6995	Tsfm	3.6993	Gm15446	1.857	Gnl3l	3.43603	AK041408	2.07163	Oat	1.68859	Pold3	5.59564	Cdc23	43.0666	Cpeb2	5.1365	4933439C10Rik	5.81728	Pfkm	4.39807	Rnasel	5.88863
																						Cnot1	7.69497	Pprc1	37.6294	Gusb	12.5458	Dapk3	3.66461	Tmem175	1.83756	Atp11c	3.39134	Scd2	2.02381	Tnfaip2	1.57586	Rab15	5.55057	Cxxc1	42.8076	Szrd1	5.11834	Cacna1c	5.79626	Nudt8	4.34974	Lrp11	5.82923
																						D230025D16Rik	7.57442	Epn2	37.6037	Tcirg1	12.4592	Rad23b	3.6537	Cxadr	1.79791	Sms	3.25355	Ighmbp2	2.02019	Vasp	1.56887	Syce2	5.50693	Matr3	42.7287	Ptprf	5.06095	Tceal1	5.71607	Dffa	4.31419	Mroh1	5.77455
																						Ddhd2	7.50962	Dpcd	37.2404	U2surp	12.3807	Mpp7	3.64207	Mif1	1.79341	Eif3m	3.16185	Anxa3	2.00213	Mcc	1.56848	Psme2	5.40714	Hmgxb3	42.6156	Ddi2	5.03926	Mgat3	5.65066	Lgals3bp	4.29718	Tmod1	5.59144
																						Dhodh	7.4401	AK083197	36.7959	Synrg	12.3164	Avpr1a	3.62907	Taf8	1.75366	Pin1	3.12961	Cyp2d22	1.98749	Elovl1	1.55928	Apc2	5.25205	Me2	42.5571	Cisd1	4.63723	Armc9	5.62452	C4b	4.26909	Ogdh	5.5879
																						Ing1	7.43771	Hps6	36.7376	Gdf6	12.316	Snrpf	3.6197	Pms2	1.65903	Zrsr2	2.88266	Hexb	1.87823	Ebna1bp2	1.55639	Dusp23	5.24681	Fam13b	42.3763	Lims1	4.59436	Gab3	5.61969	Ncoa2	4.23905	Ramp2	5.57446
																						Prmt7	7.40178	Grb10	36.6359	Fabp4	12.2184	Lace1	3.60458	Filip1l	1.65675	Lacc1	2.86773	Col5a3	1.83563	AK202301	1.55412	BC018242	5.24435	Ier3ip1	42.2347	Tpm2	4.56989	Sesn3	5.60181	Camsap2	4.19894	Rabep2	5.57415
																						BC040690	7.34992	Pgam1	36.3357	Lta4h	12.1833	Agap2	3.58035	Ikzf2	1.62203	Fam168a	2.83823	Coro7	1.77479	Klf16	1.51581	Arih1	5.21768	Slc39a6	41.8712	Cobl	4.54051	Dhrs9	5.54231	Adck5	4.1448	Aldh16a1	5.35169
																						Csnk2a2	7.19902	D19Ertd737e	36.1387	6430548M08Rik	12.1056	Fbxo30	3.57623	Sfrs18	1.6127	Mtm1	2.81385	Mrgbp	1.7731	Zbtb7a	1.50476	Pnkd	5.14245	Csnk1a1	41.6254	Srebf2	4.52905	Atg16l2	5.48678	Col14a1	4.13064	Appl2	5.34769
																						Dhx38	7.19594	Pgpep1	35.9676	Ppp1r21	12.0695	Jmjd1c	3.57234	Mapkapk5	1.60204	Atg4a	2.77501	Tmem127	1.72471	Rpl18a	1.50371	Rnf149	5.13103	Hars2	41.3384	2510009E07Rik	4.46853	Ccdc117	5.33664	Tmem98	4.11038	Ilkap	5.06587
																						Cyb5b	7.15366	Nat2	35.8112	Mapk13	12.0437	Ccdc59	3.54387	Unk	1.59991	Flnc	2.74641	Gamt	1.71673	Eif3i	1.49377	Rassf5	5.09765	Zfp236	40.9653	Fbln5	4.4615	Pgap1	5.31731	Cyp20a1	4.10196	Esrra	5.00567
																						Slc25a15	7.07707	Trim8	35.1303	Dnajc15	11.97	Polr3b	3.52224	Snx17	1.58203	1700048O20Rik	2.72699	Mppe1	1.71078	Rps20	1.48032	Smyd2	5.06264	Dnajc18	40.808	Ncbp1	4.38981	Islr	5.15783	Ubb	4.09584	Ly6f	5.00114
																						Edc4	7.0637	Ece1	34.9328	Crabp2	11.9104	Fzr1	3.5095	AK154113	1.53289	Slc36a1	2.70283	Rbck1	1.59441	Sh3bgr	1.46863	Pofut1	5.03954	Chmp1b	40.4541	Esyt2	4.36131	Zc3hav1l	5.08174	Tpr	4.04464	Klf4	4.92099
																						Ciapin1	6.99574	Xk	34.5674	Gdf11	11.828	Cactin	3.45796	Tbc1d19	1.51064	Dynlt3	2.6495	A330009N23Rik	1.49291	Coro1c	1.44907	Kansl3	5.02377	Zfp407	40.3473	Yars	4.33989	Smox	5.07844	Degs1	4.01322	Chp1	4.89123
																						Fbxo8	6.82283	Nhlrc2	34.1466	Medag	11.8185	Rpf2	3.44186	D16Ertd472e	1.50637	Sat1	2.60967	Cdip1	1.42419	Tmco4	1.43577	Zbed3	5.00762	Paip2	40.1145	Haus8	4.33805	LOC100503280	5.01455	Bcs1l	3.97159	Bnip3	4.81602
																						Abhd13	6.77021	Pold4	34.0778	Hspa12b	11.7231	Angptl7	3.38344	Zkscan7	1.46792	1110012L19Rik	2.52929	Pip4k2a	1.40407	Flot1	1.40523	Fam131b	4.83294	Pfdn1	39.6735	AK199358	4.26379	Prtg	4.96872	Peli3	3.95568	Tnfsf12Tnfsf13	4.77765
																						Babam1	6.64388	Entpd7	34.0389	Ankrd10	11.5566	Hnrnph3	3.37762	Paqr3	1.45965	Las1l	2.50711	Csnk2a1	1.3746	Adra1d	1.40098	Cab39	4.62191	Phax	39.4676	AK046304	4.24597	Eif4enif1	4.9345	Actr1b	3.94057	Trim44	4.77517
																						Chmp1a	6.61417	Plgrkt	33.5848	Pbrm1	11.5046	Bsg	3.37239	G3bp2	1.45567	AK196840	2.44606	Crem	1.37068	Senp5	1.39524	Ptpn1	4.50745	Usp14	39.2301	Hoxa4	4.23284	Map2k5	4.61985	Ppp1r7	3.91339	Pcdhb9	4.77247
																						Orc6	6.60386	Pdcd4	33.4999	Fgl2	11.4955	Map2k2	3.31524	Ythdc1	1.36856	Bbs9	2.27751	Rnd2	1.36611	Adamts5	1.38625	AK040602	4.45921	BC031181	39.1046	Dtnb	3.95496	Wdr13	4.60118	AA388235	3.88029	Pld2	4.75646
																						Heatr3	6.55676	Exosc1	33.3889	Por	11.4782	Reps1	3.24887	Cdc7	1.34533	Maoa	2.20422	Gpr149	1.36152	Hspbap1	1.35505	Samd14	4.44252	Tcerg1	39.104	Dysf	3.92144	Clpx	4.55763	Fam134a	3.86186	Herc2	4.7506
																						Xab2	6.48971	Uhrf2	33.3147	Camk2b	11.3474	Ltv1	3.23942	Ccdc39	1.32911	Trove2	2.18642	Mmp11	1.35088	Arpc2	1.32978	Rnf130	4.41651	Pik3c3	39.0433	Sgms2	3.90651	Rab3gap1	4.49231	Eid2b	3.85362	Gstp1	4.73864
																						Nudt21	6.45487	Mms19	32.9422	Fez2	11.2882	Sf3a2	3.23606	Coq2	1.32736	Prps2	2.16621	Glyr1	1.31978	Ppp1r2	1.32636	Scfd2	4.30893	Cep120	38.1044	Ripk2	3.88734	Accs	4.49166	Cops8	3.83265	Slc35c1	4.70526
																						Hook3	6.41084	Rere	32.9354	Serac1	11.1817	Klhl30	3.19658	Pdik1l	1.29688	Tbl1x	2.15833	Ppm1j	1.30689	Pet100	1.32478	Ppil3	4.30092	Wdr55	37.9945	Efnb2	3.86917	Ccdc136	4.47928	Ufd1l	3.79559	F2rl1	4.64945
																						Ndufb7	6.4066	S1pr3	32.7837	Cops6	11.1194	Lsm7	3.19488	Frs2	1.27121	AK048446	2.11291	Rae1	1.27323	Irx5	1.32163	Galm	4.29068	Tcof1	37.9928	Shfm1	3.85187	Cxcl12	4.40417	Sipa1l2	3.78479	As3mt	4.53811
																						Dync1li2	6.33386	Ppapdc2	32.6817	Lsp1	11.1085	Psma3	3.18894	Nom1	1.25118	Nck1	2.1037	Klf10	1.26821	Tspan17	1.30054	Tmem140	4.26476	Rps14	37.5545	Klhl9	3.84783	Ormdl1	4.36578	1700003E16Rik	3.77339	Ube2g1	4.38676
																						Usp38	6.32208	Fes	32.5685	Dock9	11.1046	Stk11	3.18368	Zcchc8	1.24983	Hipk3	2.09119	Map3k11	1.23088	Vav2	1.28634	Usf1	4.22541	Lars	36.9706	Fgfr1op2	3.81956	Dopey1	4.34207	Irf9	3.72444	Rab43	4.34441
																						Cherp	6.29103	Myof	32.1458	Chek2	11.0494	Pa2g4	3.16957	5430416N02Rik	1.21045	AK209647	1.99662	Jam2	1.22614	Ctps	1.26933	Sema4c	4.03332	Pggt1b	36.6703	Rraga	3.78472	Cand2	4.31284	Glrx2	3.67179	Ulk2	4.22934
																						Map2k7	6.26177	Gpx7	32.1048	Neu1	11.0047	Atp6v0b	3.14939	Stx18	1.20909	Plod2	1.96917	4833419F23Rik	1.1708	Mob3a	1.26852	Rps6kc1	4.03158	Mbd1	36.414	Tgfb1i1	3.75634	Rab30	4.22544	Atraid	3.63077	Tmem256	4.19501
																						D8Ertd738e	6.25115	Sept8	32.0871	Slc39a10	10.9552	Gopc	3.11591	C130046K22Rik	1.20479	Zc4h2	1.949	Aifm2	1.16024	Tada3	1.25466	Tuba8	3.94444	Srp19	35.955	AU022252	3.73683	Zfp30	4.16071	Zyx	3.60942	Arrb1	3.97317
																						Cep44	6.23683	Zdhhc16	31.9403	Capn7	10.8586	Pigh	3.09117	Cdkn1b	1.15962	Myo18a	1.90494	Col4a5	1.14674	L3mbtl2	1.24036	Meis3	3.87545	Ctdp1	35.5021	Ppfibp1	3.72874	Cep19	4.15373	Chd6	3.57399	Rab20	3.7839
																						2810428I15Rik	6.23269	Arl8a	31.9015	Mettl20	10.7274	Tspan31	3.07269	B4galnt4	1.12188	Atp6ap1	1.8767	Oxnad1	1.14564	Urb2	1.22644	Ccnt2	3.79462	Mex3c	35.3554	Wasf2	3.70885	Map2k4	4.14917	AK045970	3.54837	Isyna1	3.68756
																						Asns	6.20248	Mpg	31.7513	Zfp658	10.6127	Anapc16	3.0282	2900026A02Rik	1.11578	Tyk2	1.84473	Hectd2	1.09906	Phf5a	1.21681	Lrrc16b	3.79461	Rpl17	35.3449	Zdhhc2	3.70008	Smarca1	4.11554	Ifnar2	3.52533	Tnfsf12	3.63586
																						2810004N23Rik	6.1968	AK171159	31.3139	Uchl1	10.5811	Rps15	3.01116	Rchy1	1.09602	Ddrgk1	1.83411	Rom1	1.08218	Pef1	1.21449	N4bp3	3.54	Galnt1	35.2788	Cd24a	3.63334	Mtfmt	4.09689	Kdm6b	3.52038	Phka2	3.60228
																						Atp13a1	6.16304	Nqo2	31.2575	Dpf2	10.5228	Sphk1	2.96151	AK012891	1.09444	St6gal1	1.82542	Naa40	1.01422	Ptp4a2	1.21439	Trp53bp2	3.52517	Slc35a4	34.4408	Fancc	3.63031	1700003M07Rik	4.08146	Syngap1	3.43157	Dlgap4	3.54447
																						Itgb1	6.16047	Acsf2	31.038	Gramd1b	10.4934	Timm13	2.95155	Orc3	1.08876	Snap29	1.64358	Chmp7	1.00979	Ankrd1	1.1734	Zmym6	3.24994	Rnmt	33.8977	B630005N14Rik	3.61862	Dock1	3.97956	Ccdc93	3.42694	Dclk2	3.46962
																						Uba52	6.15583	BC147260	30.8153	Lrig1	10.3221	Atp6v1d	2.9437	AK209947	1.0798	Dennd4a	1.60973	Rpap1	0.9789	Klkb1	1.13333	Zfp715	3.23549	Txnl1	33.6037	Zhx2	3.58639	Pja1	3.93565	Vangl2	3.2655	Ncbp2	3.44244
																						Ranbp10	6.10439	Hsf4	30.7849	Csrp2	10.3175	Wibg	2.94332	Gtdc1	1.07756	Apoo	1.58223	Hspa4l	0.931323	Cutc	1.12581	Tmem231	3.19516	Bin1	32.9107	Necap2	3.58008	Tspan6	3.87078	Rab3d	3.25865	Yif1a	3.34108
																						Frg1	6.10158	2010012O05Rik	30.7479	Zfp760	10.2746	B4galt2	2.93373	Fbn2	1.02552	Idh3g	1.47021	AK208673	0.924929	Srm	1.0984	Plekha2	3.06491	Arhgap12	32.5765	AK142386	3.55699	Fam210b	3.80401	Stk11ip	3.24067	Doc2g	3.33329
																						Golga7	6.09077	Tshz3	30.6885	Pdgfd	10.1691	Plekha1	2.92198	Sass6	1.01583	Larp1	1.43645	Mrpl39	0.914049	Zeb2os	1.05367	Ndufa10	3.03854	Fam53c	32.3715	3110039M20Rik	3.55617	Map4k4	3.78253	Ddx17	3.22352	Ifi27l2a	3.32632
																						Kars	6.08819	Rpp30	30.6027	Ccne1	10.109	Tmem259	2.83111	Nek4	0.952386	Gdi1	1.40924	Immt	0.897003	Lgals1	1.04811	Scyl3	3.03243	Esco1	32.2694	Lphn2	3.55072	Gal3st4	3.77639	Trim12a	3.19686	Morn4	3.24026
																						Gipc1	6.00269	Stambpl1	30.5815	Mtch1	10.0687	Acat3	2.80213	Rabl3	0.913476	Clca2	1.35071	Megf10	0.861135	Tbccd1	1.02298	Col7a1	2.92688	Iws1	32.227	Nek3	3.51906	D930048N14Rik	3.63992	Fgfbp3	3.16236	Pamr1	3.21088
																						Fnta	5.99748	Mtus1	30.5722	AK179349	10.0202	Pex3	2.79514	Gtf3c2	0.907948	Cd302	1.34262	Gm10125	0.824076	Cenpt	1.017	Pla2g7	2.83065	Npc1	31.5756	Ei24	3.46872	Gbp3	3.6379	Bmpr2	3.14939	Mmp23	3.2063
																						Pcm1	5.96811	Sgms1	30.4279	Ppm1b	9.88458	Plekhj1	2.76265	Prickle1	0.902448	Inpp5f	1.32141	Rell2	0.704947	Rin3	0.953981	Akip1	2.78888	Cep192	31.3708	Rad51b	3.45305	Dnah7b	3.5753	4831440E17Rik	3.1192	Nid1	3.15532
																						Upf1	5.9516	Tcf7l2	30.0862	Ipo5	9.85908	Msln	2.7521	4930429B21Rik	0.897905	9430037G07Rik	1.27312	Acss2	0.703169	Dnm1l	0.913828	Dsel	2.679	8030462N17Rik	30.4109	Slc44a1	3.4115	AK038736	3.54509	Ccdc148	3.08008	l7Rn6	3.07201
																						Adam9	5.77626	Eef1d	30.0493	Msh6	9.82191	Tmbim4	2.74378	Unc5b	0.893256	Nup160	1.15109	1300002E11Rik	0.662147	Tlr4	0.909458	Akap12	2.64544	Ino80c	30.3561	Rhob	3.38535	Helz2	3.52114	Dip2b	3.07957	Cdk2ap2	3.0506
																						Nab1	5.77616	Cdo1	29.982	Dzip1	9.79304	Zdhhc17	2.73655	Amn1	0.882283	Sytl5	1.14592	Ccl11	0.650439	Cd74	0.901459	Sh3bp4	2.53652	Polr2d	29.8595	Tspan15	3.32646	Zfp61	3.50965	Larp6	3.06965	Tnfsf13	3.03803
																						Upf3a	5.74996	AB349943	29.9524	Tspan13	9.756	Adat2	2.71964	Igf2r	0.723335	Tceal8	1.13821	2610528A11Rik	0.540987	Pttg1	0.897007	Ypel4	2.53294	Dym	29.718	Fmnl3	3.29902	Tomm34	3.49328	Adcy6	3.04969	Scn7a	3.03514
																						Nr2f6	5.67207	Btrc	29.7856	Zfp655	9.74409	Tdg	2.7188	Cd209c	0.69294	Ubxn7	1.11206	Serpini1	0.524581	Ifngr1	0.893273	Wdfy1	2.50463	Rock1	29.3982	Gm12603	3.28476	Adam23	3.33006	Eif5b	3.04831	Plin3	3.03089
																						Nacc1	5.66523	Pir	29.6855	Rbm38	9.651	Dnajb12	2.70029	E530011L22Rik	0.686559	Trerf1	1.04735	Gm10069	0.519763	Dnlz	0.860172	Il1rn	2.47392	Ddb1	29.3201	Ppt1	3.2576	Dhtkd1	3.29169	Lats2	3.02125	AI462493	3.00918
																						Slc7a11	5.66191	Aldh18a1	29.6409	Ube3c	9.51666	Vps26a	2.67967	2410018M08Rik	0.657543	Abcc4	0.957481			Runx1	0.763427	Thbs3	2.35829	Snrpd1	29.1745	Specc1l	3.2546	Nf2	3.2512	Stat1	2.98925	AI606181	3.00627
																						Tmem192	5.64945	Ubtd1	29.2945	Gabra4	9.45554	Asap2	2.67248	Ptcd1	0.627023	Fastkd5	0.915667			Slc30a1	0.726918	Nucb1	2.35693	Timm21	29.1255	Scx	3.24679	Zfp446	3.20952	Slc9a9	2.98395	Clca1	2.9899
																						Trmt1	5.37277	Dnmbp	29.2081	Hivep2	9.45211	Bloc1s1	2.64603	Pth1r	0.60547	Fam98c	0.860757			Rrm2b	0.724337	AK135254	1.88282	DQ553245	29.069	Fam20c	3.23379	Evc	3.20167	Kctd18	2.96856	Wdr54	2.98619
																						Mon1b	5.32191	Cisd3	28.7313	Fuca2	9.40884	Ptges3	2.53871	Tatdn3	0.580813	Nlrc3	0.838223			Serinc3	0.714971	Mrps9	1.65819	Eif1a	28.4741	Pdlim7	3.23087	AI118078	3.1873	Ly96	2.9632	Gda	2.97325
																						Nans	5.30477	Gsto1	28.6167	Mier2	9.29278	Tmtc3	2.53075	Ergic2	0.572551	Dync2h1	0.824874			Hdgf	0.692799	Kdm3a	1.64103	Ubxn1	28.3134	Atp6v1g1	3.21958	Plat	3.1749	Dars2	2.94914	Mrps12	2.90731
																						Aktip	5.29354	Josd2	28.5727	Fbxo11	9.28854	Lrrc27	2.52469	Syde2	0.564689	Mrps26	0.755536			AK181755	0.688717	Gtpbp10	1.5902	Hnrnpul2	28.067	Sf3a3	3.21454	Clint1	2.80807	Adam15	2.93987	Klhl24	2.89556
																						Itfg1	5.28375	Tnks2	28.4778	Lamc2	9.21641	AK013192	2.49169	Angptl2	0.54415	March8	0.523395			Gm527	0.68715	Atg16l1	1.51497	Rttn	26.6515	Camkk2	3.20352	Nlgn2	2.72309	Fam117b	2.93233	Ccdc9	2.87368
																						Def8	5.28371	G6pc3	28.4344	Gtf3c6	9.14272	Abhd17a	2.48507	Hadha	0.540785	Rgs19	0.472738			Celf4	0.682405	Mir6950	1.275	Ndufa2	26.5912	Epas1	3.15786	Radil	2.66013	Gnaq	2.93168	Uap1l1	2.8668
																						Rnf170	5.1786	Npm3	28.2432	AK043046	9.1005	Rcan2	2.4815	Zfp513	0.523702					Psd3	0.681966	Mustn1	0.969829	Sap130	25.8004	Zcchc7	3.13331	Rai1	2.62053	Prkcd	2.91398	Zfp618	2.77872
																						Ccdc124	5.17741	Pten	28.2099	Atf6	9.0758	Atxn7l3b	2.47424	Mterf1b	0.49822					Fkbp15	0.655979	Ctu1	0.713881	Ptpn2	25.7711	Cmpk1	3.12764	Taz	2.61452	L3hypdh	2.91271	Zkscan6	2.76398
																						Lig4	5.17493	Rnase4	28.0322	Rbpms2	9.01106	Mif	2.47318	Eaf2	0.2393					Ctsd	0.583206			Pcdhb17	25.5597	Il17rc	3.11229	Ap4m1	2.55714	Znf512b	2.89634	Abhd4	2.73389
																						Irf2	5.10726	Tmbim1	27.2133	Mettl16	8.96268	Nus1	2.47238							Lactb2	0.571398			Yipf5	25.1183	Sox5	3.10948	Acvrl1	2.54912	Tbc1d17	2.87443	Kpna1	2.69067
																						Agpat6	5.09188	AK215772	27.1793	Ntn1	8.96116	Egln3	2.43951							Brk1	0.534164			AK083567	24.0917	Zcchc17	3.09561	Mmd	2.44893	Il17rd	2.86856	Hsph1	2.58344
																						Erich1	5.01915	Atp6v1h	26.9813	Nsun7	8.95373	Pfkl	2.43197							Atp10d	0.524328			Osbpl1a	23.9213	Hdac7	3.07688	Zscan2	2.40114	Tram2	2.81911	BC017158	2.58031
																						Mbtps1	5.00971	Loxl4	26.9705	Pla2g16	8.92777	AK076839	2.40232							Ifi35	0.481888			Ndfip1	23.7408	Prkar2b	3.06553	Smoc2	2.38463	Dusp22	2.81182	Itpripl1	2.50348
																						Klhdc4	4.91908	Jak2	26.846	Ncoa7	8.90571	Mum1	2.39892							Snca	0.360729			Atp6v1a	23.265	Med21	3.02282	Gimap9	2.18574	Ccdc157	2.79659	Cox17	2.42473
																						Nol3	4.90857	Acap3	26.6487	Ccdc125	8.89738	Nmt1	2.37089							Gpx4	0.354561			1500015A07Rik	23.1072	Mier1	3.0137	Itga2b	2.1665	Hdac10	2.775	Ptgs1	2.35202
																						Rnf166	4.89474	Plcl1	26.3173	Vmn1r43	8.85077	Mon2	2.34534											Zfp91	23.0289	Pla2g5	3.01205	Mx2	2.07768	Csad	2.7236	Ctsa	2.33349
																						Gars	4.87995	Emx2os	26.2648	Gspt2	8.82145	Tmem19	2.32874											Nr3c1	22.8243	Inpp5b	2.98026	Ypel1	2.03519	Tfb2m	2.72015	Oxsm	2.29799
																						Trappc5	4.86748	Prickle3	25.9415	Pea15a	8.80692	Erh	2.28586											4930503L19Rik	22.81	Foxg1	2.95549	Fignl2	2.00091	Cnnm3	2.64983	AK030308	2.26813
																						Fam65a	4.86185	Serpinb9	25.6733	Eml5	8.75645	Ncln	2.27648											Elac1	22.3917	Slc48a1	2.95445	Pigb	1.9507	9430016H08Rik	2.64473	Rad9a	2.26624
																						Snd1	4.838	Gls	25.5425	Zfp397os	8.74909	Chrnb1	2.2386											Zfp516	22.3347	BC026590	2.94892	Pcca	1.92215	Wdr5b	2.63838	Arl6ip1	2.22894
																						Chfr	4.82685	Rrp12	25.1484	Mbtd1	8.7005	Rnf126	2.21136											Grpel2	22.1096	Pacsin2	2.9468	D930001I22Rik	1.87462	Prr12	2.63145	Acap2	2.07593
																						AK208648	4.77986	Acsl5	24.9698	Ttyh3	8.6953	Cd151	2.20162											Pura	22.0097	Nxph4	2.93599	Irgm2	1.73141	Mllt6	2.55469	BC034090	2.07351
																						Herpud1	4.75676	AK029443	24.937	Naa25	8.55811	Cdc34	2.17664											Pdgfrb	21.828	Ass1	2.89417	Zfp3	1.72548	Mitf	2.5501	Capn5	1.971
																						Pcbp1	4.73781	Gas5	24.7747	Mcfd2	8.52658	Tfrc	2.14952											AK019420	21.3605	Slc4a7	2.81702	Ss18l1	1.66072	Trpm4	2.52179	AK132885	1.91799
																						Ldlrad3	4.73528	Pxk	24.7647	Xpo7	8.39247	Ankrd37	2.13707											Ctnna1	21.3362	AK144897	2.81279	F2r	1.64961	Mob3c	2.50589	Kcnk3	1.79536
																						Ccnd2	4.73461	Sulf1	24.68	AK189633	8.29101	Trmt11	2.11621											AK171952	20.4895	AB346318	2.79179	Peli1	1.64841	Adamts12	2.49426	Ppdpf	1.75562
																						Papd5	4.69481	Pcyt1a	24.6654	Strn4	8.27193	AK218698	2.11035											Aldh7a1	20.2465	Cep85	2.78158	Mbp	1.59463	Kdelc1	2.48743	Pold1	1.71104
																						Smarca5	4.6821	Taf5	24.3959	Clip3	8.1817	Mipol1	2.08355											Dpysl3	20.0737	AK198376	2.77503	Trim21	1.56238	A930007I19Rik	2.48254	Vmn2r29	1.64556
																						Tomm20	4.6607	Agpat2	24.2997	Fbxl13	8.16196	Arl1	2.06309											Rnf138	19.9729	AB346228	2.76352	Pigx	1.5582	Xpc	2.47273	Svil	1.58827
																						Slc3a2	4.64743	Rfk	24.2837	Zfp609	8.01602	Traf3	2.02216											Smad7	19.8275	Tmpo	2.72021	Zmiz2	1.51856	Trim12c	2.46406	Uevld	1.57144
																						Cul4a	4.5924	Poll	23.9595	Ust	8.01584	Csrnp1	1.99764											Sil1	19.8049	Triqk	2.66356	Gpr146	1.49778	2210016F16Rik	2.41865	Bcl2l2	1.49995
																						Usp10	4.54678	Eva1b	23.8709	Cln5	7.95103	Palm	1.98091											Lox	19.5789	Slc6a9	2.62871	Patz1	1.37327	Arrdc4	2.34414	Naga	1.4524
																						Aga	4.50093	Zcchc3	23.6325	Asl	7.82332	Rrp1	1.96596											2410004N09Rik	19.5751	Rassf6	2.59916	Prrx1	1.23544	Cxcl10	2.31505	Snx21	1.45124
																						Piezo1	4.4715	Bbip1	23.5648	Zfhx2	7.81776	Gbe1	1.95471											Prrc1	19.5472	Nbn	2.58755	Myh14	1.17534	Cep350	2.31075	Anxa7	1.43567
																						Nup133	4.42108	Phf3	23.4252	Sfxn5	7.78506	Shmt2	1.94641											Tpgs2	19.4106	Exosc3	2.51683	Tmcc2	1.11878	Fbxl6	2.30051	Sema3c	1.24076
																						Nfat5	4.40332	Tmem106a	23.3665	AI413582	7.76782	4930430F08Rik	1.94537											Spire1	19.2763	Psip1	2.47561	Asb7	1.10788	Uggt1	2.29123	Fstl1	1.2314
																						Tti2	4.37249	Ptp4a1	23.2557	Tmeff2	7.75252	Pdia6	1.90495											Abca7	19.2204	Dusp8	2.46033	Ap5s1	1.09173	Tmem223	2.25946	Pih1d1	1.16043
																						Pdf	4.34083	Ptrh1	22.7328	Ccdc66	7.74561	Tube1	1.87836											Rprd1a	19.1099	Nrd1	2.45786	AK034716	1.0859	Sumo1	2.25071	Mien1	1.10193
																						Ell	4.32633	Bloc1s2	22.162	Gtf3a	7.69716	Mrpl42	1.87799											Igip	18.9357	1110037F02Rik	2.43649	Fan1	0.986902	Abtb1	2.16738	Edem2	1.02292
																						Vps4a	4.25653	Mina	22.1412	Acsl4	7.68883	Thop1	1.83926											Poli	18.7137	Rbbp4	2.42508	Ganc	0.949108	Trim12	2.14183	Mrps14	0.986572
																						Pcid2	4.1784	Paqr7	22.1107	Psmd11	7.62954	Mettl15	1.81059											BC134356	18.6533	Kctd10	2.41019	Gm2382	0.932577	Zfp142	2.11769	Supt6	0.912062
																						Micu3	4.08818	Gbf1	21.7377	Spaca6	7.62329	2310011J03Rik	1.79316											Fem1c	18.6151	Spp1	2.39718	Ppef1	0.872815	Rqcd1	2.11607	E2f1	0.830727
																						Bcar1	4.03738	Kcnn4	21.6836	Plekho1	7.61768	Arhgef10l	1.71156											Sec11c	17.929	Eif2b3	2.37602	Errfi1	0.857151	Khk	2.06554	Itm2b	0.689142
																						Tmem161a	4.00898	Arhgap31	21.603	Galc	7.60063	Becn1	1.66791											Pcdhb16	17.8765	Nudt9	2.33935	AI987944	0.723506	Txndc9	1.96432	Extl3	0.530511
																						AK177800	3.99559	Nfib	21.5563	Axin1	7.59452	Rbm25	1.65061											Socs6	17.672	Fbxw17	2.31298	Ghr	0.646554	Ccdc159	1.9201
																						Gmip	3.94471	Tuba4a	21.538	Fnbp4	7.56728	Gtf2i	1.64356											AK084265	16.9386	Dnajb4	2.28898			Iqcg	1.88621
																						Fbxo31	3.93229	Coa3	21.4642	Mfap4	7.56616	Ppa1	1.64129											Lman1	16.7279	Cachd1	2.21288			Gm16515	1.82859
																						Prkaca	3.91477	AK049852	21.3589	1700024P16Rik	7.49527	Naca	1.61548											Zfp91Cntf	16.5968	Hace1	2.1625			A330023F24Rik	1.69136
																						2700029M09Rik	3.86122	Mtmr10	20.7357	Ankib1	7.47284	Zbtb18	1.58326											Vps8	15.9438	AK008866	2.15206			Nme4	1.69074
																						Ndufa13	3.8419	Vamp3	20.7166	Apbb1ip	7.42042	Gna11	1.56962											Rbfa	15.2458	Esyt1	2.12831			AK089957	1.64952
																						Lrrc59	3.72228	Ifit2	20.5454	AK148054	7.41586	Isoc1	1.535											Gramd3	15.1182	C1galt1	2.11818			Trmt1l	1.64306
																						Armc6	3.71098	Rbm12b1	20.4507	Zmynd8	7.39157	Vps53	1.5257											Mapre2	14.8885	5830415F09Rik	2.06863			Vamp2	1.61989
																						Cope	3.70022	Mt1	20.3729	Gabrb1	7.38048	Taldo1	1.50284											Adnp2	14.8268	Xrcc4	2.05882			Mfsd7a	1.53409
																						Arl2bp	3.67514	Hes6	20.3642	Erc2	7.37518	R3hdm4	1.49584											Tmco6	14.4524	Dnajc25	2.05174			Eid1	1.45264
																						Atp11a	3.65772	Acyp2	19.9557	AK198904	7.3569	Scn3a	1.47751											Efemp1	14.4417	Dna2	1.98941			BC099611	1.4082
																						2310045N01Rik	3.64255	Snhg6	19.7178	Lrpprc	7.32349	Mrps10	1.47402											Sft2d3	14.1604	Lgals2	1.98568			Sf3a1	1.34343
																						Slc12a4	3.638	Plxnb2	19.4564	Neat1	7.31375	Dohh	1.44896											Tubb6	13.2081	Prmt2	1.98225			Diexf	1.09225
																						Timm44	3.58326	Zfp764	19.3859	Anapc7	7.26024	Rpl41	1.44201											Ostf1	13.0493	Mecr	1.97771			Sgsm2	0.95189
																						Lamp1	3.57867	Slc1a5	19.3277	Hmgb1	7.23421	Sh3pxd2b	1.43781											Slc26a2	13.0055	Mtfr1l	1.97148			Fastkd2	0.941718
																						Cdc16	3.4691	Vat1	19.2861	Myo7a	7.22961	Tcp1	1.40617											Dtna	12.9485	Stoml2	1.92499			Cspp1	0.941553
																						Erlin2	3.31664	Capn1	19.1423	Crmp1	7.22117	Nt5dc3	1.40247											2700062C07Rik	12.9346	Cdyl	1.91322
																						Arhgef10	3.29906	Zfp518a	19.0114	Ttc19	7.21544	Ston2	1.39907											Prkdc	12.8793	Slc25a16	1.91262
																						Trappc11	3.29773	Rpl7	18.9126	Mto1	7.19103	Srp54a	1.39828											Fchsd1	12.5104	Ccne2	1.82388
																						Snx25	3.29268	Mapk3	18.6487	Mirg	7.1765	Ncoa4	1.37497											Nedd4l	12.4913	Has2os	1.78931
																						Asna1	3.27442	Dgcr8	18.5664	Lmtk3	7.13479	Hmg20b	1.36549											Dscr3	12.4114	Ttc4	1.78797
																						Cog2	3.26947	Prss23	18.4625	Axl	7.134	Fam198b	1.36503											Iah1	12.1639	Wdr70	1.75478
																						Hsbp1	3.26815	Ifit1	18.3864	Spcs2	7.11402	Pard6b	1.35825											Haus1	11.8323	Cep63	1.7386
																						Tfdp1	3.26643	Kif1b	17.9693	Hagh	7.10597	Slc39a3	1.34855											Akt3	11.7596	Srf	1.73149
																						Pkn1	3.24509	Mt2	17.7806	Arf4	7.08741	Dph2	1.34327											Zfp532	11.5769	Lrrcc1	1.71968
																						Psmd7	3.22078	Mvp	17.7553	Rgl2	7.07857	Cdk5r1	1.34128											Cndp2	11.5195	Dand5	1.67866
																						Rgs3	3.21747	Ppp1r12b	17.7234	Slc25a37	7.0622	Tnfaip3	1.28862											Tmx3	11.4748	Pnpla6	1.64628
																						Aars	3.20933	Carhsp1	17.5068	Fstl3	7.0503	Mrpl54	1.25199											AK144485	11.1134	Terf2	1.63866
																						Mrps31	3.18493	Pnp	17.4812	Dot1l	7.02003	N6amt2	1.19033											Ddx27	10.9849	Hid1	1.6361
																						Cmc2	3.12554	Dcaf6	17.3127	Cd63	7.00297	Nprl3	1.18198											Tcf4	10.9802	Fermt2	1.59697
																						AK089283	3.09316	Spop	17.2079	Atp2a2	6.96287	D10Wsu102e	1.15856											Brd8	10.7935	Alg14	1.57329
																						Lsm6	3.09072	Serpinb8	17.1668	Shpk	6.94869	Polr2e	1.11197											Dbndd2	10.7783	Ltbp4	1.56335
																						Mical3	3.07612	Gsto2	17.0952	Ypel5	6.90533	Tspyl1	1.10899											Rnf141	10.6088	Toe1	1.54962
																						Arhgef18	3.051	H6pd	16.8574	Uck1	6.90117	Sgpp1	1.02561											Hps3	9.97034	AI314180	1.52104
																						Phgdh	3.02893	Pcsk6	16.8568	Mrpl49	6.86118	Micall1	1.02489											Ywhab	9.69941	Psmb2	1.49992
																						Il16	3.02241	Ang	16.7921	Srd5a3	6.85919	Itgb8	0.955475											Tmem14a	9.62313	Pole3	1.49012
																						Bid	3.00845	Il3ra	16.672	Dmwd	6.82297	Pip5k1c	0.883464											Stard6	9.5573	Ago3	1.48151
																						Taf5l	2.9189	Ccnj	16.6442	Fnip1	6.77926	Tkt	0.81024											Lmnb1	9.53101	Nfix	1.47778
																						Mpv17l2	2.88824	Aida	16.6368	Cct6a	6.71924	Syde1	0.772438											Dnajb11	9.506	Mtss1l	1.42979
																						Gtf2e2	2.84585	Klhl21	16.6237	Msh2	6.71655	Eef2	0.738455											Nme5	9.49502	Aptx	1.42689
																						Slc35e1	2.83087	Avpi1	16.583	Ildr2	6.70486	Cirbp	0.70569											Vapb	9.49282	Trp53cor1	1.41451
																						Zcchc14	2.82885	Lama2	16.4654	Ppp1r11	6.67653	Tpgs1	0.641436											Pcdhb13	9.4888	Msmp	1.3995
																						Slc25a42	2.81807	Anxa6	16.3118	U2af2	6.66932	Sf3b5	0.444719											AK079994	9.43295	Ccdc53	1.39723
																						Fto	2.78225	Gng12	16.2901	Thada	6.63272	C030046I01Rik	0.43582											Zfp438	9.2796	Tlr3	1.39234
																						Tmem208	2.69824	Calhm2	16.2122	Lrch2	6.62978	Mrp63	0.29508											Fyttd1	9.14002	Klc1	1.30784
																						Mcph1	2.68241	Plcb3	16.0938	Spred3	6.5481													Ccdc112	8.84452	Recql	1.28692
																						Bag4	2.67959	Fbxl15	15.9471	AK197973	6.54356													Rbbp8	8.4109	Arid1a	1.25838
																						Vps13d	2.67902	Spef1	15.8318	Arid3a	6.51501													AW554918	8.29271	Gne	1.22522
																						Gsdmd	2.6752	Fra10ac1	15.4239	Picalm	6.47538													9430020K01Rik	8.26131	Sdhb	1.22145
																						Eri1	2.67009	AK208069	15.3999	Ttyh2	6.46026													Dpp7	8.23349	Tceb3	1.19689
																						Tma16	2.62691	Snhg1	15.2758	Zwint	6.43115													Taf4b	8.14526	Sp2	1.13576
																						Mat2a	2.5881	Pctp	15.2593	Ptprs	6.41072													Aip	7.50897	Msantd3	1.13438
																						Tpm4	2.57392	Rpl31	15.165	Yap1	6.40172													Tle1	7.33549	Fam134b	1.07295
																						Ing2	2.56844	4931428F04Rik	15.1221	Wdr17	6.32441													Mir143hg	7.29886	Fam104a	1.03883
																						Taf1c	2.55035	Atic	15.0064	AK021199	6.29626													Dcbld2	7.25707	Tmem69	1.00335
																						Camsap3	2.51583	AK038880	14.9496	Atg9b	6.27617													Ppp2r5b	7.22656	Gclm	0.995779
																						Exosc6	2.51102	Phf13	14.941	Ece2	6.25189													1700086O06Rik	7.14597	Tubd1	0.986433
																						Satb2	2.49693	Dusp5	14.851	6430411K18Rik	6.23281													Dcn	7.03041	0610037L13Rik	0.976934
																						Tollip	2.4679	Zfp709	14.6822	Cog3	6.20559													Slmo2	6.92884	Syf2	0.963979
																						Atf5	2.44973	Sharpin	14.3738	Hsp90b1	6.16085													Gm9949	6.88771	Pnrc2	0.952799
																						Mphosph6	2.44344	Gm4759	14.2388	Ehmt2	6.1405													Cyb561a3	6.86903	Kdm1a	0.937456
																						Fgfr1	2.3605	Slc25a17	14.2229	Nhsl1	6.1391													Vdac2	6.75384	Mars	0.867891
																						Tradd	2.35464	Nacad	14.2137	Zfp940	6.11464													Apbb3	6.72742	Ppp1r8	0.812983
																						Serpinh1	2.32149	Cpe	14.1893	Btbd9	6.04492													Son	6.64976	Vps25	0.782959
																						Fbxo25	2.31364	AK179044	14.1297	Tmx2	5.94233													AK088734	6.52871	Cdkn2aipnl	0.752739
																						Klhl26	2.29733	Adh7	13.7387	Stk38	5.89714													Synpo	6.50944	Tifa	0.736642
																						Zfpm1	2.29202	Nav1	13.6764	AK050859	5.88													Apmap	6.42666	Fut8	0.661132
																						Ddx19a	2.26764	Fam132b	13.6333	Hnrnpll	5.8697													Fads1	6.42237
																						Mau2	2.25057	Saysd1	13.5811	Naa16	5.85238													AK085760	6.26475
																						Rragc	2.21081	Mpst	13.5281	Rab31	5.80211													Pcdh9	6.22184
																						Hes1	2.20437	Miip	13.47	Ilf3	5.79785													Ubn1	6.06275
																						Zfp330	2.20273	Hspe1	13.4336	Gm15663	5.76453													Klra19	5.9257
																						Afg3l1	2.18909	Ifit3	13.4246	Ephb2	5.71181													Klra6	5.87263
																						Pard3	2.17817	Hs3st5	13.3077	Sema4b	5.66977													Wdr74	5.84648
																						Polb	2.14934	Fbxo6	13.284	Amdhd2	5.62242													4933412E12Rik	5.75881
																						Tango6	2.08841	Nt5c2	13.2466	Ndufab1	5.55795													Gtf2e1	5.62216
																						Gcsh	2.05346	Ralb	13.1714	Tada2a	5.5528													1110059E24Rik	5.60403
																						Cdr2	2.05294	Anxa1	13.0904	Adpgk	5.53526													Mapre1	5.55917
																						Vps37a	2.03511	Nmral1	13.0736	AK038627	5.4874													Fjx1	5.55502
																						Emc8	2.00106	Tulp3	12.9667	Lrrk1	5.45381													Rrn3	5.35643
																						Pde8a	1.97945	AK083252	12.7985	Pdxk	5.44864													Spg7	5.32997
																						Rwdd4a	1.96233	Tango2	12.7492	Pmepa1	5.32454													Skida1	5.26404
																						Cpd	1.94502	Ston1	12.7458	Cic	5.28075													AK208506	5.04307
																						Arglu1	1.89883	AK087340	12.707	Ndfip2	5.2615													AK008288	4.97995
																						Cbr4	1.85953	Snhg4	12.6868	Tax1bp3	5.24217													Impact	4.89792
																						Brf2	1.84167	Lyst	12.6537	Cdk4	5.23878													Fth1	4.88765
																						Pgls	1.83138	Mrpl15	12.4509	Dnajc3	5.20883													Itsn1	4.85859
																						Sugp1	1.82011	Comp	12.3948	Snx30	5.16919													Cct8	4.78775
																						Atxn1l	1.78094	Dip2c	12.1696	Ywhae	5.15618													B4galt6	4.74306
																						Ube2e2	1.76192	Fsd1l	12.1376	Gramd1a	5.14813													Gnas	4.69204
																						N4bp1	1.74598	Arfgef1	12.1354	Asphd2	5.10187													BC035532	4.65202
																						Elavl1	1.73179	Serpinf1	12.0682	Pdhb	5.08691													Timmdc1	4.5358
																						Aprt	1.71518	Hrsp12	11.9883	Leo1	5.08425													Dusp11	4.49178
																						Mcoln1	1.65367	Serpine2	11.9824	Tom1l1	4.97863													Apex1	4.47611
																						Atp6v1b2	1.64007	Trim3	11.9415	Ralgds	4.95926													N6amt1	4.39304
																						Chd9	1.63189	1810009A15Rik	11.8379	Dhx34	4.92638													Ankrd29	4.29957
																						Hsdl1	1.61608	Flii	11.7971	Snn	4.92214													Ints5	4.20962
																						Anapc10	1.59776	Pitrm1	11.7738	Kat5	4.90684													AK198990	4.19602
																						Med26	1.50568	Dak	11.7373	Garem	4.79069													Eno3	4.18311
																						Cntf	1.43795	LOC102308570	11.6851	Nup88	4.77015													Bmi1	4.17923
																						Lgals3	1.42064	Pcx	11.6752	Srpk1	4.75405													Taf7	4.0229
																						Gadd45gip1	1.36919	Tmem43	11.622	Bclaf1	4.73035													Nrep	3.97479
																						Wrn	1.36447	Pkp4	11.5246	Ttc5	4.69593													Pcyox1l	3.90204
																						Zfp710	1.30712	Rab9	11.5227	Grasp	4.6672													Polr2g	3.85763
																						AK187594	1.27847	Ascc2	11.4842	Rpain	4.6372													Nin	3.85552
																						Cars2	1.25268	Prx	11.4305	AK132872	4.57308													Tnfrsf1b	3.8128
																						B3gnt2	1.2252	Uvrag	11.1659	AK031468	4.4986													AK019679	3.76375
																						Nob1	1.20851	Mapk11	11.1283	A230046K03Rik	4.48095													Use1	3.74986
																						Chac1	1.20831	Dock7	10.9812	Psmc2	4.45842													Atg3	3.74215
																						Sars	1.18165	Prr13	10.9164	AI846148	4.45037													Kitl	3.70875
																						Pbp2	1.16273	Ifi27	10.8248	Gm14322	4.34988													Dhps	3.64333
																						Selk	1.08589	Eef2k	10.8003	Klhl5	4.3251													Adprh	3.63297
																						Siah1a	1.08457	Phf20	10.695	Grem2	4.30535													AK144367	3.44978
																						AK003208	1.04362	Rpl35a	10.4246	Yeats4	4.26866													Samd1	3.44646
																						Rspry1	1.02281	Wdr66	10.3964	Gm15408	4.24578													Zeb2	3.42346
																						Txnl4b	0.91699	Galnt13	10.2757	Dusp14	4.24576													Gpr39	3.38937
																						Coprs	0.856153	Figf	10.2694	Spns1	4.23939													AK170612	3.34578
																						Dcaf10	0.814845	Rpl3	10.2583	Apol7a	4.21													Ralgapb	3.33693
																						Ap3m2	0.790783	Cd14	10.1075	Adamts7	4.17162													Dtwd2	3.30495
																						Edn1	0.78685	Rabep1	10.0693	Zcchc10	4.15792													Prss12	3.27915
																						Edf1	0.680547	Tmem201	10.0409	Gm14403	4.09866													Ubtf	3.20266
																						Hmox2	0.663635	Ggt7	10.019	Trf	4.08898													Pdia5	3.19772
																						Otud3	0.572144	Rpl30	10.0046	Pwwp2a	4.08387													C630043F03Rik	3.1763
																						Rab7l1	0.561342	Zfp322a	9.98263	Bag6	4.0707													Srl	3.14032
																						Shmt1	0.487093	AK137356	9.97525	Thoc7	4.06867													Tmem179b	3.10179
																						Sin3b	0.476108	Serp2	9.94954	Pafah1b3	4.02914													Pigt	3.09831
																						Lif	0.440539	Tmem106c	9.8527	Gnptab	4.02718													Fam71f1	3.07412
																						4930513N10Rik	0.382378	Sorcs1	9.83048	Ssc5d	4.00416													Cbwd1	3.03592
																						Cnep1r1	0.375493	Ctnnbl1	9.72161	Gm14420	3.98231													Pisd-ps1	2.98175
																						Anxa4	0.344074	Ccnl2	9.6775	Fam216a	3.96616													BC027231	2.94819
																								Prune2	9.34096	Xpo6	3.92814													Mir7219	2.91307
																								Vamp4	9.29763	Pank3	3.92749													Katnal2	2.90366
																								Lsm10	9.29406	Arhgef40	3.90651													Pi4ka	2.88195
																								Clec2d	9.26422	AF357426	3.90573													Cct7	2.84537
																								Trappc2l	9.21115	4632419I22Rik	3.87736													Ppil2	2.82366
																								Eef1b2	9.16442	Sft2d1	3.87535													Patl1	2.79235
																								Arvcf	9.03157	Arhgap22	3.85904													Ccdc58	2.68944
																								Bola2	8.87797	Arpp19	3.82603													Eif6	2.61549
																								Tpd52l2	8.87081	Ddah2	3.82334													R3hcc1	2.57657
																								Atl3	8.83031	Dmpk	3.79109													Fubp1	2.57502
																								Blvrb	8.79141	Osbpl8	3.76399													Gpr137	2.57367
																								Lap3	8.7791	4921504A21Rik	3.73505													Cpsf7	2.50683
																								Rpl7a	8.71014	Nap1l4	3.70244													Yaf2	2.43621
																								Cflar	8.69495	Gm17066	3.69692													Zfp608	2.41771
																								Snhg5	8.42331	Armc8	3.67214													Zc3h7a	2.29907
																								Snhg3	8.36859	Efr3b	3.61448													E030003E18Rik	2.28659
																								Pabpc1	8.2777	Xpo5	3.60192													Mapk1	2.22676
																								Piezo2	8.26639	Alox5ap	3.56312													Dock8	2.20152
																								2010320M18Rik	8.24177	Syt11	3.55505													Nov	2.15687
																								Gm13152	8.11084	Rbm26	3.55086													Parg	2.09602
																								Lhpp	7.9895	Ccz1	3.54174													Alg1	2.07228
																								Zswim3	7.73404	Tmem248	3.52366													Usp16	2.05328
																								Slc22a21	7.61433	Pip4k2c	3.51145													Osgep	2.05018
																								Dact3	7.59008	Zfp664	3.49672													Snx4	1.96364
																								Dock11	7.46824	Vars2	3.49082													AK207499	1.94443
																								Ophn1	7.44193	Srsf1	3.47327													Ube2l3	1.84644
																								Pdlim2	7.4388	Hnrnph1	3.45775													Cnih2	1.81086
																								Tardbp	7.42543	Atp8a1	3.44016													AK078979	1.79102
																								Tmsb4x	7.3664	Thbd	3.43591													Nfatc1	1.76275
																								Rpl24	7.36577	Eci1	3.38101													Ilvbl	1.72429
																								Mid1	7.36442	Zfp605	3.37373													Bnip3l	1.67337
																								Mtmr3	7.35972	Scyl1	3.37208													Yars2	1.57919
																								Rad50	7.06595	Tubb4a	3.37017													Zswim8	1.48076
																								Smap1	7.05813	Gpr85	3.30082													Rlf	1.47736
																								Abca6	7.0547	Socs5	3.27453													B3gat3	1.45652
																								Rpl12	7.03489	BC005764	3.24778													Gdpgp1	1.39706
																								Svep1	7.01198	Gpalpp1	3.22302													Casp3	1.39609
																								Rps21	6.99202	Lrrn4	3.21234													Ptpn7	1.27505
																								Lasp1	6.96008	AB347501	3.21138													Ppap2c	1.20655
																								Tinagl1	6.95747	Spon2	3.20851													Ecd	1.18956
																								Gdpd3	6.75348	Lpcat3	3.17048													Pcdhb5	1.17206
																								Socs2	6.60079	Cpt1c	3.16529													AK158038	1.16028
																								Apod	6.60048	Cep135	3.15315													Irak4	1.13186
																								Asb1	6.55496	C2cd3	3.13528													Samd9l	0.999026
																								Tiam1	6.49576	Zfp629	3.10321													Ptpla	0.982766
																								Ica1l	6.472	Ddx11	3.09022													Sema6a	0.97171
																								Sash1	6.32384	Rnf41	3.08643													AK184225	0.959817
																								Dusp28	6.28142	Hdac5	3.06076													1700052N19Rik	0.937178
																								Insr	6.2601	Ptov1	3.03499													AK010878	0.867614
																								Nagk	6.24904	Ppp2r2d	3.00531													Abi1	0.85203
																								Etv5	6.21789	Mir377	2.99934													Itgav	0.837928
																								Rnpepl1	6.13223	Lepr	2.99753													Stam	0.823168
																								Sugp2	6.12467	Cpsf6	2.95422													Arl8b	0.766219
																								Sept5	6.11823	Ap3m1	2.93035													Ehbp1l1	0.662649
																								Mrm1	6.05739	Psmb6	2.88811													Serbp1	0.612942
																								Bmp2	6.02342	Relt	2.87297													Chmp6	0.572541
																								Wwp1	5.9318	Tmem206	2.84306
																								Dnaja3	5.90213	Psap	2.8398
																								Ddr2	5.52481	Slc38a1	2.78039
																								Rnase1	5.49551	Gfra4	2.77727
																								Gpr153	5.4909	Cox8a	2.77705
																								1110054M08Rik	5.33722	Adam12	2.77272
																								Myeov2	5.10442	Appbp2	2.75291
																								Ptges2	5.01924	Mir541	2.74787
																								Znfx1	4.96429	C530008M17Rik	2.73267
																								Gsn	4.94521	Mknk2	2.72827
																								Impdh1	4.9343	Dtx2	2.7108
																								Tmed8	4.90925	Snrpa	2.70976
																								Dnajc27	4.81621	Rpn1	2.6665
																								Lypla1	4.7964	Mcm9	2.63263
																								Npm1	4.77379	2610507B11Rik	2.62132
																								Edem1	4.75906	Dnaic2	2.61637
																								Fv1	4.75843	Bre	2.58263
																								Piga	4.72679	Cpsf4	2.54688
																								Tdrkh	4.65445	Arl4c	2.51108
																								Lyrm4	4.6032	Mir770	2.50557
																								Map1lc3a	4.54688	Mir1188	2.49007
																								Rtfdc1	4.45731	Fkbp4	2.48162
																								Ipo9	4.33831	DQ267102	2.47161
																								Paf1	4.3131	Setd1b	2.46372
																								Tmem41a	4.30183	Sh2b1	2.42096
																								Gp1bb	4.29444	Syvn1	2.39297
																								BC030398	4.2643	Zfp938	2.3826
																								Ddx18	3.92509	Swap70	2.36764
																								Polr2h	3.89876	Tmed5	2.3616
																								Pitpna	3.53283	Blmh	2.33334
																								Spry4	3.48689	Esd	2.33016
																								R3hdm1	3.48609	Ube3b	2.30763
																								Mpped2	3.43541	Shb	2.29328
																								Cpox	3.43184	Mtmr9	2.27997
																								Myrf	3.42291	Limd2	2.26996
																								Timm17a	3.34842	Gsr	2.26559
																								Kctd21	3.23292	AK081796	2.22389
																								Arfgef2	3.22946	Git2	2.21815
																								D930015E06Rik	3.1947	Dock5	2.19533
																								Rbx1	3.17514	Hcfc1	2.18232
																								AK054476	3.14126	Vash2	2.15812
																								Tmem143	3.12977	Denr	2.12025
																								Pabpc4	3.10973	AK034420	2.04547
																								Rrp15	3.06188	Atxn2l	2.02235
																								March3	2.92772	Bud31	2.00864
																								Rrs1	2.80926	Fam131a	1.99913
																								Glud1	2.77914	Txnrd1	1.98459
																								Lbp	2.74924	Tcf3	1.98327
																								Itih2	2.7122	Dcp1b	1.96913
																								Dbnl	2.69291	Rgcc	1.90006
																								Accn1_B830045N13Rik	2.48313	Mir453	1.74496
																								Bmpr1a	2.47958	Mtrf1l	1.73112
																								Nadsyn1	2.44444	Phkg2	1.71744
																								Ntpcr	2.41926	Zfp62	1.69427
																								Usp25	2.38202	Nrbf2	1.66614
																								Rhou	2.33736	Mir409	1.5751
																								Trim13	2.32156	Ndst2	1.5465
																								Zcchc2	2.23007	Midn	1.45397
																								Irgq	2.22996	Mfap2	1.43533
																								Tldc1	2.22396	Mrpl33	1.43006
																								Pcyt2	2.1831	Pgm2l1	1.38809
																								Tlcd2	2.14996	Pdcd2l	1.38791
																								Trim46	2.11836	Gtf2ird1	1.31211
																								Senp2	2.11428	Mir412	1.25253
																								Dcaf13	2.03934	3110039I08Rik	1.24632
																								Mis18a	2.02439	Mir3072	1.21703
																								Sdf2l1	1.96847	Zbtb24	1.18011
																								3830406C13Rik	1.80983	Ndufa3	1.00961
																								Smyd4	1.77585	Pias4	0.998514
																								Prrt2	1.57534	Polr2j	0.95908
																								Wdr12	1.51214	Mex3d	0.937076
																								Hmgn1	1.358	Elp5	0.817341
																								Dnase2a	1.35438
																								Hdac4	1.1692
																								Adsl	1.01012
																								Asxl1	1.00512
																								Zfp747	0.908713
																								Cggbp1	0.813413
																								Nifk	0.653601
[truncated: 34 more columns]

## Sheet: S2_IPA Canonical Pathways
SP vs LP_IPA Pathways	-log(P-value)	P-value	Ratio	Molecules			Blue module_IPA Pathways	-log(p-value)	P-value	Ratio	Molecules		Darkred module_IPA Pathways	-log(p-value)	P-value	Ratio	Molecules		Green module_IPA Pathways	-log(p-value)	P-value	Ratio	Molecules		Turquoise module_IPA Pathways	-log(p-value)	P-value	Ratio	Molecules		Pink module_IPA Pathways	-log(p-value)	P-value	Ratio	Molecules		Salmon module_IPA Pathways	-log(p-value)	P-value	Ratio	Molecules
EIF2 Signaling	6.48	3.31e-07	0.436	EIF3C,RPL22,MAPK1,PIK3R1,RPS23,SOS2,RPL39,PDPK1,RPL35A,EIF4A2,PIK3R4,CCND1,RPS11,RPS20,RPL13,RPS13,MAPK3,PPP1CA,FRS2,EIF1AY,ATM,PABPC1,PIK3C2B,AKT2,RRAS,RPL3,FGFR1,RALB,RPL7L1,EIF2S3,RPL12,EIF3E,RPL37A,RAP1A,RPL28,GAB1,ACTA2,CDK11A,EIF2B5,RPL10,RPS25,RPS15A,PIK3CD,INSR,RPL13A,RPSA,EIF3K,RPL24,RALA,EIF2B4,DDIT3,Rpl36a,PPP1CB,RPL26,RPL7A,EIF4G1,RPL7,RPL27A,RPL35,RPL18A,PIK3C3,RPS9,EIF3A,IGF1R,AKT3,…			EIF2 Signaling	3.33	0.000467735	0.0683	RPL7A,EIF3A,PABPC1,INSR,RPL35A,RPL12,RALB,RPL7,RPL24,RPL3,RPL31,RPS21,RPL30,MAPK3		EIF2 Signaling	4.25	5.62341e-05	0.0439	RPS6,EIF3D,CCND1,RPS8,RPL13,EIF3I,RPL18A,RRAS,RPS20		Estrogen Receptor Signaling	4.35	4.46684e-05	0.0846	NR3C1,POLR2D,TAF4B,MAPK1,GTF2E1,HDAC3,POLR2G,PRKDC,TAF7,ERCC3,SRA1		Sirtuin Signaling Pathway	2.83	0.00147911	0.0661	PCK2,MTOR,POLR2F,APP,TSPO,TOMM22,SLC2A1,CPT1B,HIST1H3C,AGTRAP,HIST1H1C,TUBA1A,XRCC6,LDHD,Tomm5,UQCRFS1,HSF1		Basal Cell Carcinoma Signaling	2.58	0.00263027	0.0758	Tcf7,LEF1,FZD3,BMP3,WNT10B		Phosphatidylcholine Biosynthesis I	2.62	0.00239883	0.286	PCYT1B,CHPT1
Regulation of eIF4 and p70S6K Signaling	5.88	1.32e-06	0.451	EIF3C,MAPK1,PIK3R1,RPS23,PPP2R5B,SOS2,PDPK1,EIF4A2,MAPK13,PAIP2,PIK3R4,RPS11,EIF4EBP3,RPS20,RPS13,MAPK3,FRS2,EIF1AY,ATM,PABPC1,PIK3C2B,AKT2,RRAS,FGFR1,RALB,ITGA5,EIF2S3,EIF3E,RAP1A,PPP2R1A,GAB1,PPP2R3A,PPP2R2B,EIF2B5,RPS25,RPS15A,PIK3CD,RPSA,EIF3K,EIF2B4,RALA,EIF4G1,MAPK11,EIF4EBP1,MTOR,PIK3C3,RPS9,EIF3A,AKT3,RPS5,RPS3,RPS17,ITGB1,RPS19,NRAS,AGO2,RPS21,PPP2R5A,FAU,EIF3F,RPS4Y1,RPS16,MAPK14,RRAS2,…			Ascorbate Recycling (Cytosolic)	2.77	0.00169824	0.667	GSTO2,GSTO1		Epithelial Adherens Junction Signaling	2.94	0.00114815	0.0429	ARPC2,CDH2,ARPC4,ACVR2A,RRAS,VAV2		Assembly of RNA Polymerase II Complex	3.56	0.000275423	0.128	POLR2D,TAF4B,GTF2E1,POLR2G,TAF7,ERCC3		HIPPO signaling	2.68	0.0020893	0.101	CSNK1E,SCRIB,AMOT,TEAD4,STK3,DLG1,YWHAZ,WWC1		Factors Promoting Cardiogenesis in Vertebrates	2.09	0.00812831	0.0581	Tcf7,LEF1,NKX2-5,FZD3,BMP3		Ketolysis	2.5	0.00316228	0.25	ACAT1,BDH2
Superpathway of Cholesterol Biosynthesis	5.85	1.41e-06	0.731	MVD,SQLE,PMVK,ACAT2,MVK,HSD17B7,TM7SF2,SC5D,GGPS1,LBR,FDPS,FDFT1,DHCR24,ACAT1,LSS,HMGCR,HMGCS1,HADHA,CYP51A1			Inosine-5'-phosphate Biosynthesis II	2.77	0.00169824	0.667	ADSL,ATIC		mTOR Signaling	2.79	0.00162181	0.0345	RPS6,EIF3D,FKBP1A,RPS8,EIF3I,RRAS,RPS20		Glucocorticoid Receptor Signaling	3.55	0.000281838	0.0528	AKT3,SMAD2,TAF4B,SMAD4,NFATC1,TAF7,ANXA1,HSPA9,NR3C1,POLR2D,MAPK1,GTF2E1,POLR2G,PIK3C3,ERCC3,SRA1		Epithelial Adherens Junction Signaling	2.58	0.00263027	0.0786	TUBB2A,BAIAP2,TUBA1A,EGFR,SNAI2,RALA,ACTA2,MYL9,CTNND1,FARP2,MYH9		Assembly of RNA Polymerase I Complex	1.98	0.0104713	0.182	TBP,POLR1C		Ketogenesis	2.3	0.00501187	0.2	ACAT1,BDH2
mTOR Signaling	4.48	3.31e-05	0.406	PLD2,EIF3C,MAPK1,PRKAB1,PIK3R1,RPS23,PPP2R5B,PDPK1,EIF4A2,RICTOR,PIK3R4,RPS11,RHOG,RHOB,RPS20,RPS13,MAPK3,TSC2,PRKAA1,FRS2,AKT1S1,PRKD1,ATM,PIK3C2B,AKT2,PLD3,DDIT4,RRAS,FGFR1,RALB,RHOJ,EIF3E,MLST8,RAP1A,PPP2R1A,GAB1,PPP2R3A,PPP2R2B,RPS25,RPS15A,PIK3CD,INSR,FNBP1,RPSA,EIF3K,RALA,RPS6KA3,FKBP1A,VEGFB,HIF1A,EIF4G1,PDGFC,EIF4EBP1,MTOR,RHOD,PIK3C3,RPS9,EIF3A,RHOU,RPS6KB2,AKT3,RPS5,RPS3,RPS17,RPS19,NRA…			Purine Nucleotides De Novo Biosynthesis II	2.7	0.00199526	0.273	ADSL,IMPDH1,ATIC		Regulation of eIF4 and p70S6K Signaling	2.7	0.00199526	0.0385	RPS6,EIF3D,RPS8,EIF3I,RRAS,RPS20		tRNA Charging	3.11	0.000776247	0.132	NARS,HARS,YARS2,LARS,HARS2		Colorectal Cancer Metastasis Signaling	2.5	0.00316228	0.0632	LRP5,EGFR,TNFRSF1A,FZD2,GNB1,JAK1,PTGER4,GAB1,PIK3R1,DVL1,IL6ST,ADCY1,RALA,MMP28,ADCY9,FNBP1		Role of Wnt/GSK-3b Signaling in the Pathogenesis of Influenza	1.96	0.0109648	0.0667	Tcf7,LEF1,FZD3,WNT10B		Protein Ubiquitination Pathway	2.18	0.00660693	0.0317	ZBTB12,ANAPC4,UBR2,MED20,USP30,USP49,DNAJB4,USP45
Estrogen Receptor Signaling	3.9	0.000126	0.425	MED13,POLR2F,POLR2D,MAPK1,SOS2,DDX5,CDK8,RUNX2,MAPK3,MED21,RRAS,MED1,CDK7,HIST1H3C,RALB,TBP,POLR2H,POLR2K,RBFOX2,RAP1A,NCOA3,TAF9B,TAF4B,H3F3A/H3F3B,HDAC3,TAF5,ERCC3,NCOA1,GTF2H1,MED13L,MED23,RALA,CCNC,GTF2F2,POLR2B,NR3C1,G6PC3,GTF2B,NCOA2,PCK2,GTF2H5,PRKDC,SRA1,TAF6,NRAS,MED20,MED6,POLR2G,TAF6L,RRAS2,GTF2H4,TRRAP,GTF2E1,PPARGC1A			Urate Biosynthesis/Inosine 5'-phosphate Degradation	2.59	0.0025704	0.25	IMPDH1,PNP,NT5C2		Actin Nucleation by ARP-WASP Complex	2.62	0.00239883	0.0597	ARPC2,ARPC4,VASP,RRAS		Human Embryonic Stem Cell Pluripotency	2.86	0.00138038	0.0657	PDGFRB,AKT3,SMAD7,GNAS,SMAD2,TCF4,SMAD4,PIK3C3,APC		ERK5 Signaling	2.34	0.00457088	0.0986	EGFR,CREB3,RALA,GAB1,YWHAZ,MAP3K3,IL6ST		Human Embryonic Stem Cell Pluripotency	1.83	0.0147911	0.0438	PDPK1,Tcf7,LEF1,FZD3,BMP3,WNT10B		Choline Biosynthesis III	2	0.01	0.143	PCYT1B,CHPT1
PEDF Signaling	3.38	0.000417	0.436	TCF4,RALA,GDNF,MAPK1,PIK3R1,MAPK13,NGF,PIK3R4,MAPK11,FAS,ROCK2,IKBKG,SOD2,NFKBIA,MAPK3,PIK3C3,AKT3,CHUK,NFKBIB,FRS2,ATM,PIK3C2B,AKT2,NRAS,RRAS,FGFR1,RALB,SERPINF1,IKBKE,ZEB1,NFKB2,RAP1A,ROCK1,BCL2L1,MAPK14,RRAS2,GAB1,PIK3CD,CFLAR,TCF7L2,CASP7			Antioxidant Action of Vitamin C	2.52	0.00301995	0.0792	NFKB2,GSTO2,GSTO1,JAK2,PLCB3,MAPK11,PLCL1,MAPK3		Rac Signaling	2.41	0.00389045	0.0403	ARPC2,PAK2,ARPC4,RRAS,BRK1		FAT10 Cancer Signaling Pathway	2.73	0.00186209	0.109	AKT3,TNFRSF1B,SMAD2,TCF4,SMAD4		NF-kB Signaling	2.3	0.00501187	0.069	IGF1R,EGFR,TDP2,TNFRSF1A,EP300,RALA,GAB1,PIK3R1,NFKBIA,RIPK1,MAP3K3,IL33		Hypoxia Signaling in the Cardiovascular System	1.69	0.0204174	0.0556	JUN,UBE2I,BIRC6,UBE2K		Transcriptional Regulatory Network in Embryonic Stem Cells	1.91	0.0123027	0.0682	GATA4,H3F3A/H3F3B,TRIM24
Colanic Acid Building Blocks Biosynthesis	3.15	0.000708	0.714	TSTA3,GMPPB,UGDH,PMM1,UGP2,GALK2,GALE,GALK1,GALT,MPI			Arsenate Detoxification I (Glutaredoxin)	2.47	0.00338844	0.5	GSTO1,PNP		Pyrimidine Ribonucleotides Interconversion	2.35	0.00446684	0.075	AK4,CTPS1,ENTPD2		Iron homeostasis signaling pathway	2.62	0.00239883	0.0661	PDGFRB,HSPA9,SMAD2,FECH,MAPK1,ATP6V1A,SMAD4,FTH1		Acute Phase Response Signaling	2.22	0.0060256	0.0705	FN1,MTOR,TNFRSF1A,RALA,IL1RAP,F8,PIK3R1,NFKBIA,RIPK1,IL33,IL6ST		NRF2-mediated Oxidative Stress Response	1.67	0.0213796	0.0366	DNAJA4,JUN,SOD2,FKBP5,HSPB8,SCARB1,UBE2K
Cholesterol Biosynthesis I	3.12	0.000759	0.75	SQLE,FDFT1,DHCR24,HSD17B7,LSS,TM7SF2,CYP51A1,SC5D,LBR			STAT3 Pathway	2.33	0.00467735	0.0682	RALB,BMPR1A,IL10RB,JAK2,INSR,MAPK11,SOCS2,IL3RA,MAPK3		GM-CSF Signaling	2.3	0.00501187	0.0488	CCND1,RUNX1,BCL2L1,RRAS		Granzyme B Signaling	2.56	0.00275423	0.2	LMNB1,CASP3,PRKDC		Molecular Mechanisms of Cancer	2.03	0.00933254	0.0519	CDK11A,LRP5,FZD2,EP300,JAK1,GAB1,PIK3R1,CTNND1,E2F3,NFKBIA,DVL1,APH1A,ADCY1,RALA,CDKN2B,FAS,ITGA5,ADCY9,CDK13,FNBP1		CD27 Signaling in Lymphocytes	1.4	0.0398107	0.0577	JUN,Map3k7,MAP3K4
Cholesterol Biosynthesis II (via 24,25-dihydrolanosterol)	3.12	0.000759	0.75	SQLE,FDFT1,DHCR24,HSD17B7,LSS,TM7SF2,CYP51A1,SC5D,LBR			G Protein Signaling Mediated by Tubby	2.31	0.00489779	0.138	JAK2,INSR,PLCB3,GNG12		Pyrimidine Ribonucleotides De Novo Biosynthesis	2.29	0.00512861	0.0714	AK4,CTPS1,ENTPD2		Regulation of the Epithelial-Mesenchymal Transition Pathway	2.37	0.0042658	0.0521	LOX,PDGFRB,AKT3,SMAD2,TCF4,ZEB2,MAPK1,SMAD4,APC,PIK3C3		Glioma Signaling	2.01	0.00977237	0.0732	IGF1R,EGFR,MTOR,RBL2,RALA,CDKN2B,GAB1,PIK3R1,E2F3
Cholesterol Biosynthesis III (via Desmosterol)	3.12	0.000759	0.75	SQLE,FDFT1,DHCR24,HSD17B7,LSS,TM7SF2,CYP51A1,SC5D,LBR			Purine Nucleotides Degradation II (Aerobic)	2.13	0.0074131	0.176	IMPDH1,PNP,NT5C2		Fcg Receptor-mediated Phagocytosis in Macrophages and Monocytes	2.13	0.0074131	0.0435	ARPC2,ARPC4,VASP,VAV2		Huntington's Disease Signaling	2.16	0.00691831	0.046	HSPA9,AKT3,POLR2D,TCERG1,NAPG,MAPK1,ATP5F1A,CASP3,HDAC3,POLR2G,PIK3C3		ILK Signaling	2	0.01	0.0632	VIM,FN1,MTOR,TNFRSF1A,SNAI2,CREB3,ACTA2,MYL9,GAB1,PIK3R1,FNBP1,MYH9
PI3K/AKT Signaling	3.11	0.000776	0.407	JAK1,BAD,MAPK1,PIK3R1,SOS2,PPP2R5B,PDPK1,CCND1,PTEN,YWHAQ,IKBKG,MAPK3,TSC2,NFKBIB,AKT2,CDC37,YWHAB,RRAS,RALB,ITGA5,NFKB2,RAP1A,BCL2L1,PPP2R1A,GAB1,PPP2R3A,PPP2R2B,PIK3CD,RALA,ILK,INPPL1,JAK2,EIF4EBP1,HSP90B1,MTOR,NFKBIA,RPS6KB2,AKT3,CHUK,CTNNB1,ITGB1,NRAS,IKBKE,PPP2R5A,RRAS2,SYNJ1,FOXO1,PTGS2,CDKN1B,PPP2R1B			PEDF Signaling	2.05	0.00891251	0.0722	NFKB2,RALB,CFLAR,SERPINF1,MAPK11,TCF7L2,MAPK3		Actin Cytoskeleton Signaling	2	0.01	0.0276	ARPC2,PAK2,ARPC4,RRAS,BRK1,VAV2		Remodeling of Epithelial Adherens Junctions	2.11	0.00776247	0.0781	CTNNA1,Mapre2,TUBB6,MAPRE1,APC		Dermatan Sulfate Degradation (Metazoa)	1.98	0.0104713	0.188	HYAL1,CEMIP2,IDS
Cardiac Hypertrophy Signaling	3.1	0.000794	0.368	MAPK1,PIK3R1,MAPK13,MAP3K4,PIK3R4,TGFBR2,ROCK2,GNB1,RHOG,RHOB,TGFB1,MAPK3,Map3k7,GNA13,PLCL1,FRS2,GNG12,ATM,MAP3K2,PIK3C2B,RRAS,FGFR1,RALB,IL6R,RHOJ,PLCL2,RAP1A,CACNA1A,ADRA1D,MYL9,ADCY9,ADRA2A,GAB1,GNAO1,TGFB3,EIF2B5,GNB2,PLCB3,MAP2K3,PIK3CD,FNBP1,HSPB1,EIF2B4,RALA,CAMK4,Calm1 (includes others),MAPK11,GNG7,PLCH1,PLCD1,MTOR,GNG11,JUN,IGF1,PPP3CB,RHOD,PIK3C3,CREB1,TGFB2,IGF1R,RHOU,MAPKAPK2,MYL12B,…			Iron homeostasis signaling pathway	2.05	0.00891251	0.0661	BMPR1A,ATP6V1H,JAK2,MMS19,BMP2,LYRM4,BTRC,MAPK3		Pyrimidine Deoxyribonucleotides De Novo Biosynthesis I	1.88	0.0131826	0.0952	AK4,RRM2B		Osteoarthritis Pathway	1.99	0.0102329	0.0484	CTNNA1,SMAD7,TNFRSF1B,SMAD2,TCF4,DCN,CASP3,SMAD4,HDAC3		Remodeling of Epithelial Adherens Junctions	1.97	0.0107152	0.0938	EXOC2,TUBB2A,TUBA1A,RALA,ACTA2,CTNND1
PTEN Signaling	3.01	0.000977	0.405	RALA,BAD,MAPK1,PIK3R1,SOS2,ILK,BMPR2,PDPK1,INPPL1,CCND1,PTEN,TGFBR2,IKBKG,CASP9,MAPK3,SIRT6,RPS6KB2,IGF1R,AKT3,CHUK,PDGFRB,ITGB1,AKT2,NRAS,FLT1,SHARPIN,CASP3,RRAS,FGFR1,RALB,FLT4,PREX2,ITGA5,IKBKE,NFKB2,RAP1A,IGF2R,BCL2L1,CBL,RRAS2,FOXO6,SYNJ1,FOXO1,NTRK3,PIK3CD,INSR,CDKN1B,BCL2L11,MAGI3			Aryl Hydrocarbon Receptor Signaling	1.91	0.0123027	0.0625	HSPB1,NFKB2,GSTO2,GSTO1,NQO2,NFIB,ALDH18A1,MAPK3		Huntington's Disease Signaling	1.81	0.0154882	0.0251	DNM1L,SNCA,CLTA,BCL2L1,DCTN1,CTSD		Regulation of eIF4 and p70S6K Signaling	1.96	0.0109648	0.0513	PPP2R5B,EIF1AX,AKT3,EIF4EBP3,MAPK1,PAIP2,RPS14,PIK3C3		Agranulocyte Adhesion and Diapedesis	1.94	0.0114815	0.0676	FN1,TNFRSF1A,Ccl9,AOC3,ACTA2,MYL9,ITGA5,MMP28,IL33,MYH9
Molecular Mechanisms of Cancer	2.98	0.00105	0.344	WNT10B,PIK3R1,SOS2,ARHGEF1,MAPK13,RBL1,CCND1,CCND3,GNA13,NFKBIB,FRS2,WNT5B,PRKD1,ATM,PIK3C2B,SMAD2,AKT2,CDK13,RRAS,CDK7,RALB,PTCH1,ITGA5,NFKB2,TCF3,RAP1A,CCND2,GAB1,E2F1,PIK3CD,MAP2K3,ARHGEF18,CFLAR,ARHGEF9,CDK12,TCF4,RALA,PSENEN,CTNNA1,CDK4,BMPR2,CRK,PSEN2,JAK2,CHEK1,SYNGAP1,CASP6,JUN,RHOD,PIK3C3,CDK17,RHOU,BID,CTNNB1,ITGB1,PRKDC,ADCY6,GNAQ,SIN3A,FADD,ADCY1,CASP7,CTNND1,BIRC2,JAK1,MAPK1,BAD,FZD3…			BMP signaling pathway	1.9	0.0125893	0.075	NFKB2,RALB,BMPR1A,MAPK11,BMP2,MAPK3		Ephrin Receptor Signaling	1.79	0.0162181	0.0284	ARPC2,PAK2,ARPC4,SDCBP,RRAS		Antiproliferative Role of TOB in T Cell Signaling	1.92	0.0120226	0.12	SMAD2,MAPK1,SMAD4		PI3K/AKT Signaling	1.94	0.0114815	0.0714	MTOR,MCL1,RALA,JAK1,GAB1,PIK3R1,NFKBIA,YWHAZ,ITGA5
Protein Ubiquitination Pathway	2.97	0.00107	0.361	CRYAB,USP45,DNAJB4,UBR2,UBE3B,USP20,TRAP1,FBXW7,USP7,DNAJC8,UBE2E3,PSMA2,PSMC2,NEDD4L,UBE2Q2,USP28,UBE4B,DNAJC27,DNAJC19,HSPA9,PSMC4,BIRC6,USP19,DNAJC2,THOP1,DNAJB14,UCHL3,SKP2,USP31,ANAPC4,UBE2D2,UBE2L3,CBL,USP32,ZBTB12,UBE2G1,PSMA5,HSPB11,PSMB1,DNAJC18,PSMA4,ANAPC5,TAP2,UBE2I,UBE2J2,HSPB1,B2M,ANAPC2,USP14,USP12,PSMB10,UBE2N,USP53,HSPB8,DNAJC13,UBE2W,CDC23,SASS6,UBE4A,UBE2F,USO1,PSMD10,HSP90B1,U…			IL-10 Signaling	1.78	0.0165959	0.0806	NFKB2,IL10RB,CD14,BLVRB,MAPK11		Spermidine Biosynthesis I	1.78	0.0165959	0.5	SRM,		Gap Junction Signaling	1.79	0.0162181	0.0448	CSNK1A1,AKT3,GNAS,MAP3K2,TUBB6,CSNK1G3,MAPK1,NOV,PIK3C3		Hepatic Fibrosis / Hepatic Stellate Cell Activation	1.92	0.0120226	0.064	IGF1R,EGFR,FN1,TNFRSF1A,KLF6,COL20A1,IL1RAP,ACTA2,MYL9,FAS,MYH9
ATM Signaling	2.95	0.00112	0.424	RNF8,GADD45B,PPP2R5B,CCNB2,TDP1,MAPK13,MAPK11,RAD50,SMC1A,CHEK1,USP7,NFKBIA,JUN,CREB1,BID,CHEK2,CDC25A,ATM,SMC3,ATF1,TRIM28,CREB3,CREB3L4,ZEB1,PPP2R5A,CCNB1,HERC2,RNF168,PPP2R1A,MDM4,MAPK14,CBX1,PPP2R3A,RAD9A,H2AFX,TRRAP,PPP2R2B,ATR,PPP2R1B			Citrulline Biosynthesis	1.73	0.0186209	0.222	ALDH18A1,GLS		Remodeling of Epithelial Adherens Junctions	1.78	0.0165959	0.0469	ARPC2,DNM1L,ARPC4		Mouse Embryonic Stem Cell Pluripotency	1.67	0.0213796	0.0536	AKT3,TCF4,MAPK1,SMAD4,PIK3C3,APC		Endocannabinoid Developing Neuron Pathway	1.86	0.0138038	0.0692	ADCY1,MTOR,CREB3,RALA,GNB1,GAB1,PIK3R1,MGLL,ADCY9
Prostate Cancer Signaling	2.93	0.00117	0.416	RALA,BAD,MAPK1,SRD5A1,PIK3R1,SOS2,PDPK1,PIK3R4,CCND1,PTEN,MTOR,HSP90B1,CASP9,NFKBIA,MAPK3,PIK3C3,CREB1,AKT3,CHUK,CTNNB1,NFKBIB,FRS2,ATM,PIK3C2B,AKT2,NRAS,RRAS,FGFR1,RALB,CREB3,NFKB2,CREB3L4,RAP1A,SIN3A,RRAS2,GAB1,FOXO1,E2F1,PIK3CD,LEF1,CDKN1B,GSTP1			iNOS Signaling	1.71	0.0194984	0.093	NFKB2,JAK2,CD14,MAPK11		Axonal Guidance Signaling	1.74	0.018197	0.019	ARPC2,PAK2,ADAMTS5,ARPC4,VASP,MICAL1,SDCBP,RRAS,ADAMTS1		Inhibition of Angiogenesis by TSP1	1.67	0.0213796	0.0968	AKT3,MAPK1,CASP3		Death Receptor Signaling	1.85	0.0141254	0.0795	TNFRSF10A,TNFRSF1A,ACTA2,FAS,NFKBIA,RIPK1,SPTAN1
Epithelial Adherens Junction Signaling	2.93	0.00117	0.394	MYH9,CLIP1,PTEN,TGFBR2,JUP,FARP2,ACTR2,AKT2,TUBB3,NOTCH3,RRAS,FGFR1,SNAI1,TUBB2A,RALB,WASF1,TCF3,RAP1A,APC,MET,MYL9,EPN2,CDH2,ACTA2,ARPC2,LEF1,Tcf7,EPN3,TCF4,RALA,SNAI2,Actn3,CTNNA1,BMPR2,CRK,IQGAP1,TUBB2B,YES1,SORBS1,HGF,TGFB2,AKT3,CTNNB1,VAV2,EPN1,NRAS,TUBA4A,RRAS2,TUBA1A,TUBB6,TCF7L2,ARPC4,ACVR2A,CTNND1			IL-22 Signaling	1.71	0.0194984	0.125	IL10RB,MAPK11,MAPK3		Cdc42 Signaling	1.73	0.0186209	0.0331	ARPC2,PAK2,ARPC4,VAV2		IGF-1 Signaling	1.63	0.0234423	0.0526	AKT3,MAPK1,SOCS6,YWHAB,NOV,PIK3C3		IL-6 Signaling	1.82	0.0151356	0.0682	MCL1,TNFRSF1A,RALA,IL1RAP,GAB1,PIK3R1,NFKBIA,IL33,IL6ST
Endocannabinoid Cancer Inhibition Pathway	2.87	0.00135	0.386	MAPK1,BAD,PRKAB1,PIK3R1,PIK3R4,CCND1,ROCK2,CASP9,CCND3,MAPK3,PRKAA1,GNA13,FRS2,AKT1S1,ATM,PIK3C2B,AKT2,TWIST2,CASP3,FGFR1,CREB3,CREB3L4,TCF3,MLST8,ADCY9,CCND2,GAB1,GNAO1,PIK3CD,LEF1,MAP2K3,Tcf7,TCF4,SNAI2,DDIT3,VEGFB,HIF1A,PDGFC,CASP6,MTOR,PIK3C3,CREB1,AKT3,CTNNB1,SMPD3,MAP2K7,GNAI1,ADCY6,GNAQ,VIM,ROCK1,GNAI2,MAPK14,PRKAR2B,ADCY1,CDKN1B,ADCY7,CASP7,TCF7L2			Role of JAK family kinases in IL-6-type Cytokine Signaling	1.71	0.0194984	0.125	JAK2,MAPK11,MAPK3		Clathrin-mediated Endocytosis Signaling	1.67	0.0213796	0.0265	ARPC2,DNM1L,CLTA,ARPC4,AP1M1		Protein Ubiquitination Pathway	1.6	0.0251189	0.0397	UBE2L3,HSPA9,USP16,USP14,DNAJC18,DNAJB11,CUL2,CDC23,NEDD4L,UBE2D2		CNTF Signaling	1.79	0.0162181	0.0857	MTOR,RALA,JAK1,GAB1,PIK3R1,IL6ST
Galactose Degradation I (Leloir Pathway)	2.83	0.00148	1	GALK2,GALE,GALK1,GALT,GALM			Glutamate Biosynthesis II	1.62	0.0239883	1	GLUD1,		Interferon Signaling	1.61	0.0245471	0.069	IFNGR1,IFI35		Role of Osteoblasts, Osteoclasts and Chondrocytes in Rheumatoid Arthritis	1.59	0.025704	0.0415	CSNK1A1,AKT3,TNFRSF1B,TCF4,MAPK1,SMAD4,NFATC1,APC,PIK3C3		EIF2 Signaling	1.76	0.017378	0.0585	IGF1R,CDK11A,RPL8,EIF3E,RALA,RPL22,RPS23,ACTA2,AGO2,EIF3L,GAB1,PIK3R1
p53 Signaling	2.83	0.00148	0.41	GADD45B,SNAI2,PIK3R1,CDK4,HIF1A,PIK3R4,ST13,CCND1,FAS,PTEN,CHEK1,SCO2,CASP6,JUN,STAG1,THBS1,PIK3C3,CCNK,AKT3,CTNNB1,FRS2,CHEK2,ATM,PRKDC,HDAC9,PIK3C2B,AKT2,MED1,FGFR1,PERP,RPRM,BAX,SERPINE2,BCL2L1,MDM4,MAPK14,CCND2,GAB1,E2F1,PIK3CD,ATR,PML,DRAM1			Glutamate Degradation X	1.62	0.0239883	1	GLUD1,		Thyroid Hormone Biosynthesis	1.6	0.0251189	0.333	CTSD,		Nucleotide Excision Repair Pathway	1.59	0.025704	0.0909	POLR2D,POLR2G,ERCC3		Hypoxia Signaling in the Cardiovascular System	1.74	0.018197	0.0833	COPS5,CREB3,UBE2J2,EP300,UBE2W,NFKBIA
Aryl Hydrocarbon Receptor Signaling	2.75	0.00178	0.394	MAPK1,RBL1,CCND1,ARNT,GSTZ1,CTSD,CCND3,TGFB1,MAPK3,AHR,ALDH7A1,ATM,RBL2,MED1,CDK6,NFKB2,NCOA3,ALDH9A1,CCND2,E2F1,TGFB3,ALDH3B1,ALDH18A1,ALDH16A1,GSTP1,HSPB1,NQO2,CDK4,FAS,CHEK1,TGM2,ALDH2,CCNA2,HSP90B1,JUN,NCOA2,TGFB2,GSTM4,RXRB,ALDH5A1,CHEK2,GSTM1,BAX,GSTO1,AIP,MGST2,ATR,NFIB,CDKN1B,GSTO2			Xanthine and Xanthosine Salvage	1.62	0.0239883	1	PNP,		MIF-mediated Glucocorticoid Regulation	1.56	0.0275423	0.0645	TLR4,CD74		Role of Wnt/GSK-3b Signaling in the Pathogenesis of Influenza	1.54	0.0288403	0.0667	CSNK1A1,TCF4,CSNK1G3,APC		RhoA Signaling	1.68	0.020893	0.0684	IGF1R,BAIAP2,PLXNA1,CDC42EP4,SEMA3F,ACTA2,CDC42EP3,MYL9
Chronic Myeloid Leukemia Signaling	2.74	0.00182	0.402	RALA,BAD,MAPK1,PIK3R1,SOS2,CDK4,HDAC10,CRK,RBL1,PIK3R4,CCND1,TGFBR2,IKBKG,TGFB1,MAPK3,PIK3C3,TGFB2,SMAD4,AKT3,CHUK,FRS2,ATM,PIK3C2B,HDAC9,RBL2,AKT2,NRAS,MECOM,RRAS,FGFR1,CRKL,RALB,CDK6,IKBKE,NFKB2,RAP1A,SIN3A,BCL2L1,RRAS2,HDAC3,GAB1,E2F1,TGFB3,PIK3CD,CDKN1B			SPINK1 General Cancer Pathway	1.62	0.0239883	0.0735	RALB,Mt1,JAK2,Mt2,MAPK3		IL-8 Signaling	1.56	0.0275423	0.0248	PAK2,VASP,CCND1,BCL2L1,RRAS		Parkinson's Signaling	1.48	0.0331131	0.133	MAPK1,CASP3		TR/RXR Activation	1.68	0.020893	0.0737	PFKP,MTOR,THRA,EP300,GAB1,PIK3R1,SLC2A1
iNOS Signaling	2.71	0.00195	0.488	Calm1 (includes others),CAMK4,JAK1,MAPK1,MYD88,IKBKE,MAPK13,NFKB2,JAK2,HMGA1,MAPK11,TLR4,IKBKG,LY96,JUN,MAPK14,NFKBIA,CD14,CHUK,STAT1,NFKBIB			Guanosine Nucleotides Degradation III	1.56	0.0275423	0.182	PNP,NT5C2		Arginine Degradation I (Arginase Pathway)	1.48	0.0331131	0.25	OAT,		JAK/Stat Signaling	1.47	0.0338844	0.0538	AKT3,PIAS2,MAPK1,SOCS6,PIK3C3		Sertoli Cell-Sertoli Cell Junction Signaling	1.66	0.0218776	0.061	TUBB2A,TUBA1A,DLG1,TNFRSF1A,RALA,SPTA1,ACTA2,ITGA5,MAP3K3,SPTAN1
Insulin Receptor Signaling	2.68	0.00209	0.386	JAK1,MAPK1,BAD,SGK1,PIK3R1,SOS2,LIPE,PDPK1,NCK1,PIK3R4,PPP1R14B,PTEN,PPP1R7,MAPK3,TSC2,PPP1CA,FRS2,ATM,PIK3C2B,AKT2,RRAS,CRKL,FGFR1,RALB,VAMP2,RAP1A,CBL,GAB1,ASIC1,EIF2B5,PIK3CD,INSR,EIF2B4,RALA,PPP1R3C,PPP1CB,INPPL1,CRK,JAK2,EIF4EBP1,MTOR,PPP1R10,PIK3C3,RPS6KB2,AKT3,STX4,NRAS,GRB10,RRAS2,PRKCI,PRKAR2B,FOXO1,SYNJ1,EIF2B1			PTEN Signaling	1.51	0.030903	0.0565	NFKB2,RALB,BMPR1A,PTEN,SHARPIN,INSR,MAPK3		Regulation of Actin-based Motility by Rho	1.45	0.0354813	0.0349	ARPC2,PAK2,ARPC4		PPAR Signaling	1.47	0.0338844	0.0538	PDGFRB,AIP,TNFRSF1B,MAPK1,SRA1		Agrin Interactions at Neuromuscular Junction	1.66	0.0218776	0.08	EGFR,RALA,AGRN,ACTA2,ITGA5,DVL1
Endometrial Cancer Signaling	2.59	0.00257	0.431	RALA,BAD,MAPK1,PIK3R1,SOS2,CTNNA1,ILK,PDPK1,PIK3R4,CCND1,MLH1,PTEN,CASP9,PIK3C3,MAPK3,AKT3,CTNNB1,FRS2,ATM,PIK3C2B,AKT2,NRAS,RRAS,FGFR1,RALB,RAP1A,RRAS2,GAB1,APC2,LEF1,PIK3CD			Chemokine Signaling	1.48	0.0331131	0.0676	RALB,PLCB3,MAPK11,Ppp1r12b,MAPK3		Integrin Signaling	1.43	0.0371535	0.0228	ARPC2,PAK2,VASP,ARPC4,RRAS		Wnt/b-catenin Signaling	1.46	0.0346737	0.044	CSNK1A1,PPP2R5B,AKT3,TCF4,CSNK1G3,TLE1,APC		Cardiac Hypertrophy Signaling	1.61	0.0245471	0.0539	ADRA1B,MTOR,EP300,GNB1,MYL9,GAB1,PIK3R1,ADCY1,IGF1R,RALA,MAP3K3,ADCY9,FNBP1
Germ Cell-Sertoli Cell Junction Signaling	2.53	0.00295	0.371	MAPK1,PIK3R1,PDPK1,LIMK2,MAP3K4,PIK3R4,LIMK1,TGFBR2,RHOG,RHOB,TGFB1,MAPK3,Map3k7,JUP,FRS2,ATM,MAP3K2,PIK3C2B,TUBB3,CFL1,RRAS,FGFR1,TUBB2A,RALB,RHOJ,GSN,RAP1A,EPN2,CDH2,ACTA2,GAB1,TGFB3,PIK3CD,MAP2K3,FNBP1,EPN3,RALA,ILK,Actn3,CTNNA1,IQGAP1,TUBB2B,SORBS1,RHOD,PIK3C3,TGFB2,RHOU,CTNNB1,ITGB1,MAP2K7,EPN1,NRAS,TJP1,MAP3K1,TUBA4A,MAPK14,TUBA1A,RRAS2,TUBB6,PAK2,MAP3K3,CTNND1			IL-17A Signaling in Airway Cells	1.46	0.0346737	0.0667	NFKB2,PTEN,JAK2,MAPK11,MAPK3		Salvage Pathways of Pyrimidine Ribonucleotides	1.4	0.0398107	0.0333	PAK2,ACVR2A,AK4		Type I Diabetes Mellitus Signaling	1.45	0.0354813	0.0532	TNFRSF1B,CPE,MAPK1,CASP3,SOCS6		Folate Transformations I	1.57	0.0269153	0.222	MTR,MTHFR
Remodeling of Epithelial Adherens Junctions	2.51	0.00309	0.438	RALA,CTNNA1,Actn3,IQGAP1,CLIP1,TUBB2B,Mapre2,RAB5A,ARF6,HGF,CBLL1,EXOC2,CTNNB1,DNM2,ACTR2,TUBB3,MAPRE1,TUBB2A,TUBA4A,RAB7A,APC,MET,TUBA1A,ACTA2,TUBB6,ARPC2,ARPC4,CTNND1			Acute Phase Response Signaling	1.45	0.0354813	0.0513	NFKB2,RALB,JAK2,SERPINF1,MAPK11,SOCS2,ITIH2,MAPK3		Arginine Biosynthesis IV	1.39	0.040738	0.2	OAT,		Choline Degradation I	1.42	0.0380189	0.5	ALDH7A1,		Glutamine Biosynthesis I	1.54	0.0288403	1	GLUL,
Superpathway of Geranylgeranyldiphosphate Biosynthesis I (via Mevalonate)	2.49	0.00324	0.625	FDPS,MVD,PMVK,ACAT2,MVK,ACAT1,HMGCR,HMGCS1,HADHA,GGPS1			4-1BB Signaling in T Lymphocytes	1.42	0.0380189	0.0968	NFKB2,MAPK11,MAPK3		MIF Regulation of Innate Immunity	1.38	0.0416869	0.0513	TLR4,CD74		Androgen Signaling	1.41	0.0389045	0.0465	GNAS,POLR2D,MAPK1,GTF2E1,POLR2G,ERCC3		Methylglyoxal Degradation VI	1.54	0.0288403	1	LDHD,
IL-8 Signaling	2.48	0.00331	0.363	PLD2,MAPK1,PIK3R1,LIMK2,PIK3R4,CCND1,ITGB3,LIMK1,RAB11FIP2,ROCK2,GNB1,IKBKG,RHOG,RHOB,CCND3,MAPK3,ITGAV,GNA13,NFKBIB,FRS2,GNG12,PRKD1,ATM,PIK3C2B,AKT2,PLD3,RRAS,FGFR1,RALB,RHOJ,RAP1A,MYL9,BCL2L1,CCND2,ARAF,GAB1,GNB2,PIK3CD,FNBP1,RALA,VEGFB,IQGAP1,PDGFC,GNG7,EIF4EBP1,MTOR,JUN,GNG11,RHOD,PIK3C3,RHOU,AKT3,CHUK,LASP1,VASP,MYL12B,NRAS,GNAS,FLT1,ANGPT1,FLT4,GNAI1,IKBKE,BAX,GNAI2,ROCK1,PRKCI,RRAS2,PAK2,…			IL-17A Signaling in Fibroblasts	1.42	0.0380189	0.0968	NFKB2,MAPK11,MAPK3		Arginine Degradation VI (Arginase 2 Pathway)	1.31	0.0489779	0.167	OAT,		BAG2 Signaling Pathway	1.41	0.0389045	0.0769	HSPA9,MAPK1,CASP3		Myc Mediated Apoptosis Signaling	1.54	0.0288403	0.075	IGF1R,RALA,FAS,GAB1,PIK3R1,YWHAZ
AMPK Signaling	2.33	0.00468	0.356	MAPK1,PRKAB1,PIK3R1,CPT1B,PPP2R5B,CHRNB1,LIPE,PDPK1,MAPK13,PIK3R4,CCND1,FASN,TSC2,PRKAA1,FRS2,AKT1S1,ATM,PIK3C2B,AKT2,ACACB,SLC2A1,EEF2,FGFR1,CREB3,AK3,RAB8A,CREB3L4,MLST8,PFKM,ADRA1D,PPP2R1A,ADRA2A,GAB1,PPP2R3A,PPP2R2B,AK4,MAP2K3,ACACA,PIK3CD,INSR,PBRM1,CHRM4,MAPK11,EIF4EBP1,RAB22A,CCNA2,MTOR,PCK2,CRTC2,PIK3C3,CREB1,AKT3,ILKAP,EEF2K,ADRB2,GNAS,STRADA,RAB7A,SMARCE1,SMARCD1,PFKP,PPP2R5A,BRD7,PRKAR…			MIF-mediated Glucocorticoid Regulation	1.42	0.0380189	0.0968	NFKB2,CD14,MAPK3		Proline Biosynthesis II (from Arginine)	1.31	0.0489779	0.167	OAT,		PEDF Signaling	1.4	0.0398107	0.0515	AKT3,TCF4,MAPK1,ROCK1,PIK3C3		Germ Cell-Sertoli Cell Junction Signaling	1.5	0.0316228	0.0575	TUBB2A,TUBA1A,TNFRSF1A,RALA,ACTA2,GAB1,PIK3R1,CTNND1,MAP3K3,FNBP1
Osteoarthritis Pathway	2.32	0.00479	0.36	SIK3,PRKAB1,MMP3,AGER,FZD3,PTHLH,GDF5,TGFBR2,CASP9,RUNX2,TGFB1,PRKAA1,MYBBP1A,SMAD1,ADAMTS5,IL1RAP,SMAD2,DDIT4,CASP3,SMAD9,FGFR1,DCN,CREB3,PTCH1,COL2A1,ITGA5,ANXA2,CREB3L4,NFKB2,TCF3,S1PR3,TLR2,HDAC3,LEF1,JAG1,HTRA1,Tcf7,TCF4,FGF2,IL1RL1,CTNNA1,VEGFB,BMPR2,HIF1A,PDGFC,CASP6,MTOR,DDR2,CREB1,SPHK1,SMAD4,CHUK,TNFRSF1B,CTNNB1,ITGB1,DLX5,SMAD7,GREM1,FADD,TLR4,FZD8,SOX9,PTGS2,GLI1,TCF7L2,CASP7,PPARGC1A			IL-6 Signaling	1.39	0.040738	0.053	HSPB1,NFKB2,RALB,JAK2,CD14,MAPK11,MAPK3								Lymphotoxin Œ≤ Receptor Signaling	1.37	0.042658	0.0588	AKT3,MAPK1,CASP3,PIK3C3		p53 Signaling	1.47	0.0338844	0.0667	TNFRSF10A,SNAI2,JMY,EP300,FAS,GAB1,PIK3R1
Protein Kinase A Signaling	2.31	0.0049	0.333	PTPN5,PPP1R14B,GNB1,DUSP3,DUSP11,DUSP7,GNA13,PLCL1,NFKBIB,APEX1,PRKD1,GNG12,PTPRG,PPP1R1B,CREB3,PTCH1,PLCL2,NFKB2,PTPN3,TCF3,RAP1A,PTP4A1,PDE1C,MYL9,AKAP13,GNB2,ANAPC5,Tcf7,ANAPC2,TCF4,Calm1 (includes others),PDE7A,PTPN2,AKAP8,PTPN9,PPP1R3C,DUSP22,CDC23,GNG7,PLCH1,MPPE1,PLCD1,DUSP5,PTPN4,PTPRJ,CREB1,CTNNB1,MYL12B,MYL12A,MTMR3,PTPN7,GNAQ,ADCY6,ADD3,FLNC,ADCY1,DUSP18,PTGS2,CDC27,TCF7L2,AKAP1,MAPK1,…			Adenosine Nucleotides Degradation II	1.36	0.0436516	0.143	PNP,NT5C2								RANK Signaling in Osteoclasts	1.34	0.0457088	0.0495	AKT3,MAP3K2,MAPK1,NFATC1,PIK3C3		Melanocyte Development and Pigmentation Signaling	1.45	0.0354813	0.066	ADCY1,CREB3,EP300,RALA,GAB1,PIK3R1,ADCY9
Mevalonate Pathway I	2.31	0.0049	0.667	MVD,ACAT2,PMVK,MVK,ACAT1,HMGCR,HMGCS1,HADHA			Telomere Extension by Telomerase	1.36	0.0436516	0.143	RAD50,TNKS2								Apelin Muscle Signaling Pathway	1.33	0.0467735	0.111	AKT3,GNAS		Endocannabinoid Cancer Inhibition Pathway	1.45	0.0354813	0.0588	ADCY1,VIM,MTOR,SNAI2,CREB3,GAB1,PIK3R1,SMPD4,ADCY9
Mitotic Roles of Polo-Like Kinase	2.3	0.00501	0.433	ANAPC2,PTTG1,PPP2R5B,CDC7,CCNB2,CDC23,SMC1A,PLK4,HSP90B1,TGFB1,CHEK2,CDC25A,SMC3,ANAPC13,PPP2R5A,CCNB1,SLK,ANAPC4,PPP2R1A,PPP2R3A,CAPN1,PPP2R2B,ANAPC5,CDC26,PPP2R1B,CDC27			Vitamin-C Transport	1.36	0.0436516	0.143	GSTO2,GSTO1								Acute Myeloid Leukemia Signaling	1.32	0.047863	0.049	AKT3,TCF4,KITLG,MAPK1,PIK3C3		Regulation of eIF4 and p70S6K Signaling	1.41	0.0389045	0.0577	MTOR,EIF3E,RALA,RPS23,AGO2,EIF3L,GAB1,PIK3R1,ITGA5
Hypoxia Signaling in the Cardiovascular System	2.27	0.00537	0.417	EPO,UBE2N,UBE2W,HIF1A,UBE2F,ARNT,PTEN,HSP90B1,NFKBIA,JUN,EDN1,CREB1,UBE2V1,UBE2K,UBE2E3,NFKBIB,UBE2Q2,ATM,P4HB,UBE2M,COPS5,CREB3,BIRC6,CREB3L4,UBE2L3,UBE2D2,UBE2G1,HIF1AN,UBE2I,UBE2J2			Adenine and Adenosine Salvage I	1.32	0.047863	0.5	PNP,								Ephrin B Signaling	1.31	0.0489779	0.0563	GNAS,ITSN1,MAPK1,ROCK1		UVB-Induced MAPK Signaling	1.37	0.042658	0.0758	HIST1H3C,EGFR,MTOR,GAB1,PIK3R1
Apoptosis Signaling	2.27	0.00537	0.398	GAS2,RALA,BAD,MAPK1,DFFA,FAS,CASP6,IKBKG,NFKBIA,CASP9,MAPK3,BID,HTRA2,CHUK,TNFRSF1B,NFKBIB,CAPN5,MAP2K7,NRAS,CASP3,RRAS,RALB,BIRC6,IKBKE,NFKB2,BAX,RAP1A,ROCK1,BCL2L1,CAPNS1,RRAS2,CAPN1,CAPN2,SPTAN1,BCL2L11,CASP7,BIRC2			Flavin Biosynthesis IV (Mammalian)	1.32	0.047863	0.5	RFK,														Estrogen-Dependent Breast Cancer Signaling	1.34	0.0457088	0.0674	IGF1R,EGFR,CREB3,RALA,GAB1,PIK3R1
Arsenate Detoxification I (Glutaredoxin)	2.27	0.00537	1	GLRX2,AS3MT,PNP,GSTO1			Glutamine Degradation I	1.32	0.047863	0.5	GLS,														Mouse Embryonic Stem Cell Pluripotency	1.34	0.0457088	0.0625	FZD2,RALA,JAK1,GAB1,PIK3R1,DVL1,IL6ST
Small Cell Lung Cancer Signaling	2.26	0.0055	0.402	TRAF3,PIK3R1,CDK4,PIK3R4,CCND1,CDKN2B,PTEN,IKBKG,NFKBIA,CASP9,PIK3C3,BID,AKT3,CHUK,RXRB,NFKBIB,FRS2,ATM,PIK3C2B,AKT2,FHIT,FGFR1,CDK6,IKBKE,NFKB2,SIN3A,SKP2,PIAS3,BCL2L1,GAB1,E2F1,PIK3CD,CDKN1B,PTGS2,BIRC2			Guanine and Guanosine Salvage I	1.32	0.047863	0.5	PNP,														SPINK1 General Cancer Pathway	1.32	0.047863	0.0735	EGFR,RALA,JAK1,GAB1,PIK3R1
TWEAK Signaling	2.26	0.0055	0.486	TRAF3,CASP3,IKBKE,NFKB2,FADD,CASP6,TRADD,IKBKG,RIPK1,NFKBIA,CASP9,TNFSF12,BID,CHUK,NFKBIB,CASP7,BIRC2			Sulfate Activation for Sulfonation	1.32	0.047863	0.5	PAPSS2,														14-3-3-mediated Signaling	1.31	0.0489779	0.058	TUBB2A,VIM,TUBA1A,TNFRSF1A,RALA,GAB1,PIK3R1,YWHAZ
Phagosome Maturation	2.25	0.00562	0.378	B2M,VTI1A,VPS28,CTSO,ATP6V1C1,PRDX5,NAPG,VPS33B,DYNLT1,VPS37C,CTSF,TUBB2B,CTSZ,DYNC1LI1,CTSD,RAB5A,CTSH,PIK3C3,LAMP1,VAMP3,GOSR1,NAPA,VPS11,M6PR,CTSK,TUBB3,DCTN4,VPS41,TUBB2A,RAB7A,TUBA4A,VAMP2,ATP6V1A,TSG101,GPAA1,DYNLRB1,ATP6V0A1,ATP6V1E1,CTSA,TUBA1A,ATP6V1H,TUBB6,DYNC1LI2,ZBTB12,ATP6V0D1,ATP6V0A2,VPS37B,ATP6V1B2			Taurine Biosynthesis	1.32	0.047863	0.5	CDO1,
Sirtuin Signaling Pathway	2.16	0.00692	0.342	POLR2F,GABARAPL2,MAPK1,GTF3C2,CPT1B,NDUFB8,LDHB,NDUFB10,ATG9B,PDHA1,TOMM7,SOD2,SIRT6,GABARAPL1,MAPK3,XPC,ZBTB14,PRKAA1,NDUFA10,UQCRFS1,APEX1,ATG12,PPID,SLC2A1,TIMM44,HSF1,ATP5F1A,ZIC2,HIST1H3C,TIMM8B,NFKB2,AGTRAP,PFKM,TIMM17A,ACADL,H3F3A/H3F3B,TOMM22,E2F1,H1F0,XRCC5,TOMM40,NDUFA4,EPO,GABPB1,GADD45B,NDUFA7,HIF1A,NDUFA2,POLR1C,NDUFB9,MTOR,JUN,PCK2,CRTC2,PGAM1,H1FX,CLOCK,MAP1LC3A,MAP1LC3B,GOT2,TIMM8…			Parkinson's Signaling	1.31	0.0489779	0.133	MAPK11,SEPT5
Regulation of the Epithelial-Mesenchymal Transition Pathway	2.14	0.00724	0.354	WNT10B,JAK1,MAPK1,FZD3,PIK3R1,SOS2,PIK3R4,TGFBR2,PYGO1,TGFB1,MAPK3,FRS2,WNT5B,PDGFRB,ATM,ETS1,SMAD2,PIK3C2B,AKT2,TWIST2,NOTCH3,RRAS,FGFR1,SNAI1,RALB,NFKB2,ZEB1,TCF3,RAP1A,APC,FGF17,MET,CDH2,ARAF,GAB1,TGFB3,MAP2K3,LEF1,PIK3CD,JAG1,PDGFD,Tcf7,LOX,ID2,ADAM17,TCF4,RALA,SNAI2,PSENEN,FGF2,PARD6B,PSEN2,JAK2,HIF1A,PIK3C3,HGF,TGFB2,SMAD4,AKT3,CTNNB1,MAP2K7,NRAS,DVL1,FZD8,RRAS2,TCF7L2,WNT5A			Superpathway of Citrulline Metabolism	1.31	0.0489779	0.133	ALDH18A1,GLS
Mouse Embryonic Stem Cell Pluripotency	2.13	0.00741	0.382	ID2,TCF4,JAK1,RALA,MAPK1,FZD3,PIK3R1,SOS2,BMPR2,JAK2,MAPK13,PIK3R4,MAPK11,ID1,MAPK3,PIK3C3,SMAD4,AKT3,CTNNB1,SMAD1,FRS2,ATM,PIK3C2B,AKT2,NRAS,SMAD9,RRAS,FGFR1,RALB,DVL1,TCF3,RAP1A,ID3,APC,FZD8,MAPK14,RRAS2,GAB1,PIK3CD,LEF1,Tcf7,TCF7L2
Triacylglycerol Biosynthesis	2.11	0.00776	0.472	LCLAT1,LIPT2,LPCAT3,CRLS1,PLPPR2,AGPAT1,ELOVL1,ELOVL6,AGPAT4,GPAM,AGPAT5,LPCAT2,AGPAT2,MBOAT1,LPIN2,LPIN3,AGPAT3
Hereditary Breast Cancer Signaling	2.09	0.00813	0.366	NPM1,POLR2F,POLR2D,PIK3R1,HDAC10,DDB2,PIK3R4,CCND1,PTEN,XPC,FRS2,ATM,PIK3C2B,AKT2,RRAS,FGFR1,RALB,CDK6,POLR2H,RFC1,POLR2K,RAP1A,CCNB1,HDAC3,GAB1,H2AFX,E2F1,PIK3CD,RFC3,PBRM1,RALA,GADD45B,BARD1,CDK4,POLR2B,MLH1,RAD50,CHEK1,PIK3C3,RFC2,AKT3,CHEK2,HDAC9,PMS2,NRAS,SMARCE1,SMARCD1,FANCL,POLR2G,BRD7,RRAS2,ATR,SMARCC1
Sphingosine-1-phosphate Signaling	2.08	0.00832	0.375	MAPK1,PIK3R1,PIK3R4,PDGFC,PLCH1,PLCD1,CASP6,CASP9,RHOG,RHOB,RHOD,MAPK3,PIK3C3,RHOU,SPHK1,AKT3,GNA13,PLCL1,SMPD3,FRS2,ATM,PDGFRB,PIK3C2B,AKT2,CASP3,FGFR1,GNAI1,ADCY6,GNAQ,RHOJ,PLCL2,ASAH2,S1PR3,GNAI2,ADCY9,PLCB4,GAB1,ADCY1,S1PR1,PLCB3,PIK3CD,PDGFD,ADCY7,CASP7,FNBP1
Huntington's Disease Signaling	2.07	0.00851	0.343	POLR2F,POLR2D,MAPK1,VTI1A,SGK1,PIK3R1,Hspa1b,CLTB,SOS2,NAPG,PDPK1,HDAC10,PIK3R4,GNB1,CTSD,CASP9,CPLX2,MAPK3,VAMP3,TCERG1,FRS2,NAPA,GNG12,PRKD1,DNM2,ATM,CAPN5,PIK3C2B,AKT2,CASP3,ATP5F1A,FGFR1,HSPA9,CREB3,TBP,POLR2H,POLR2K,CREB3L4,VAMP2,GPAA1,TAF9B,BCL2L1,HDAC3,GAB1,CAPN1,PENK,GNB2,PLCB3,PIK3CD,CAPN2,SNCA,POLR2B,NGF,GNG7,TGM2,CASP6,MTOR,GNG11,JUN,IGF1,PIK3C3,CREB1,IGF1R,AKT3,DNAJB1,GOSR1,HDAC9,MAP2…
Chemokine Signaling	2.07	0.00851	0.408	CAMK1,Calm1 (includes others),CAMK4,RALA,MAPK1,PPP1CB,LIMK2,CCL5,MAPK13,MAPK11,LIMK1,ROCK2,Ppp1r12b,JUN,CAMK2D,MAPK3,NRAS,CFL1,RRAS,RALB,GNAI1,GNAQ,CCL11,RAP1A,GNAI2,PLCB4,RRAS2,MAPK14,PLCB3
IGF-1 Signaling	2.05	0.00891	0.378	JAK1,RALA,BAD,MAPK1,PIK3R1,SOS2,PDPK1,JAK2,PIK3R4,YWHAQ,JUN,CASP9,IGF1,MAPK3,PIK3C3,IGF1R,RPS6KB2,SOCS2,AKT3,FRS2,ATM,PIK3C2B,IGFBP6,AKT2,NRAS,YWHAB,RRAS,FGFR1,RALB,RAP1A,GRB10,PRKAR2B,PRKCI,RRAS2,NOV,GAB1,FOXO1,IGFBP3,PIK3CD,CYR61,SOCS7,SOCS5
CDP-diacylglycerol Biosynthesis I	2.03	0.00933	0.522	AGPAT4,GPAM,TAMM41,AGPAT5,LPCAT3,LPCAT2,LCLAT1,AGPAT2,CRLS1,MBOAT1,AGPAT1,AGPAT3
Acute Myeloid Leukemia Signaling	2.02	0.00955	0.384	RUNX1,TCF4,RALA,BAD,MAPK1,PIK3R1,SOS2,PIK3R4,CCND1,EIF4EBP1,MTOR,MAPK3,PIK3C3,RPS6KB2,AKT3,JUP,FRS2,ATM,PIK3C2B,AKT2,MAP2K7,NRAS,RRAS,FGFR1,RALB,NFKB2,TCF3,RAP1A,KITLG,RRAS2,GAB1,ARAF,PIK3CD,MAP2K3,LEF1,PML,Tcf7,TCF7L2
Role of Macrophages, Fibroblasts and Endothelial Cells in Rheumatoid Arthritis	2.02	0.00955	0.334	WNT10B,PIK3R1,CCND1,PLCL1,NFKBIB,FRS2,WNT5B,PRKD1,ATM,PIK3C2B,AKT2,RRAS,CREB3,RALB,PLCL2,TCF3,RAP1A,GAB1,PIK3CD,MAP2K3,PDGFD,Tcf7,TCF4,RALA,Calm1 (includes others),FGF2,IL1RL1,CEBPD,VEGFB,CEBPZ,CCL5,JAK2,PLCH1,PLCD1,TRADD,JUN,F2RL1,PIK3C3,CREB1,TNFRSF1B,CTNNB1,MYD88,DAAM1,IL15,GNAQ,IL16,TCF7L2,RYK,TRAF3,MMP3,MAPK1,FZD3,CSNK1A1,PIK3R4,ROCK2,IKBKG,CAMK2D,TGFB1,MAPK3,LTBR,IL1RAP,FGFR1,IL6R,CREB3L4,A…
TNFR1 Signaling	2.01	0.00977	0.438	MAP4K2,CASP3,MAP3K1,IKBKE,NFKB2,FADD,TANK,CASP6,TRADD,IKBKG,JUN,CASP9,NFKBIA,RIPK1,MADD,PAK2,BID,CHUK,NFKBIB,CASP7,BIRC2
Breast Cancer Regulation by Stathmin1	2.01	0.00977	0.348	CAMK1,MAPK1,PIK3R1,PPP2R5B,SOS2,ARHGEF1,LIMK2,PIK3R4,PPP1R14B,LIMK1,ROCK2,GNB1,CAMK2D,PPP1R7,MAPK3,GNA13,PPP1CA,FRS2,GNG12,PRKD1,ATM,PIK3C2B,TUBB3,RRAS,FGFR1,TUBB2A,RALB,RAP1A,ADCY9,PPP2R1A,GAB1,PPP2R3A,PPP2R2B,E2F1,GNB2,PLCB3,ARHGEF18,PIK3CD,ARHGEF9,RALA,CAMK4,Calm1 (includes others),PPP1R3C,PPP1CB,GNG7,TUBB2B,GNG11,PPP1R10,PIK3C3,NRAS,ARHGEF12,GNAS,ADCY6,GNAQ,TUBA4A,GNAI1,TSG101,PPP2R5A,GNAI2,R…
Death Receptor Signaling	2	0.01	0.389	GAS2,PARP12,DFFA,FAS,LIMK1,TANK,TRADD,CASP6,IKBKG,NFKBIA,CASP9,TNFSF12,BID,HTRA2,PARP11,CHUK,TNFRSF1B,NFKBIB,TNFRSF21,MAP2K7,CASP3,PARP10,IKBKE,TNKS2,NFKB2,ARHGDIB,FADD,ROCK1,RIPK1,ACTA2,CFLAR,SPTAN1,CASP7,BIRC2,HSPB1
Acute Phase Response Signaling	1.99	0.0102	0.359	MAPK1,PIK3R1,SOS2,PDPK1,SERPINA3,MAPK13,RBP1,IKBKG,SOD2,ITIH2,MAPK3,NFKBIB,IL1RAP,AKT2,C3,RRAS,IL6R,RALB,NFKB2,TCF3,RAP1A,CRABP1,HMOX2,IL18,IL1RN,PIK3CD,MAP2K3,CRABP2,SOCS5,TCF4,RALA,JAK2,MAPK11,NR3C1,C1R,TRADD,MTOR,NFKBIA,JUN,SOCS2,AKT3,CHUK,TNFRSF1B,AGT,MAP2K7,NRAS,MYD88,MAP3K1,SERPINF1,IKBKE,FTL,RRAS2,MAPK14,RIPK1,SOCS7
B Cell Receptor Signaling	1.96	0.011	0.352	MAPK1,BAD,PIK3R1,SOS2,PDPK1,MAPK13,MAP3K4,PIK3R4,BCL6,PTEN,IKBKG,CAMK2D,MAPK3,Map3k7,NFKBIB,FRS2,ATM,MAP3K2,ETS1,PIK3C2B,AKT2,CFL1,RRAS,FGFR1,RALB,CREB3,MALT1,NFKB2,CREB3L4,TCF3,RAP1A,BCL2L1,GAB1,PIK3CD,MAP2K3,RALA,CAMK4,Calm1 (includes others),INPPL1,MAPK11,MTOR,NFKBIA,JUN,PPP3CB,PIK3C3,CREB1,RPS6KB2,AKT3,CHUK,RASSF5,VAV2,MAP2K7,NRAS,CSK,MAP3K1,IKBKE,MAPK14,RRAS2,FOXO1,SYNJ1,DAPP1,MAP3K3
Integrin Signaling	1.95	0.0112	0.344	MAPK1,PIK3R1,ITGA8,SOS2,TLN1,NCK1,PIK3R4,ITGB3,PTEN,Ppp1r12b,TSPAN3,PARVB,RHOG,RHOB,ITGA11,ITGA9,MAPK3,ITGAV,CAV1,FRS2,ATM,CAPN5,PIK3C2B,ACTR2,AKT2,TSPAN5,RRAS,CRKL,FGFR1,RALB,ITGA5,RHOJ,BCAR3,GSN,RAP1A,MYL9,TLN2,GAB1,ACTA2,ARF3,CAPN1,ARPC2,CAPN2,PIK3CD,FNBP1,RALA,Actn3,ILK,PPP1CB,MYLK,CRK,ITGA10,ARF6,RHOD,PIK3C3,RHOU,AKT3,PFN2,ILKAP,VASP,MYL12B,MYL12A,ITGB1,PARVA,NRAS,ASAP1,GIT1,ROCK1,CAPNS1,RRA…
PPAR/RXR Activation	1.92	0.012	0.353	MAPK1,PRKAB1,CPT1B,SOS2,TGFBR2,IKBKG,TGFB1,FASN,MAPK3,PRKAA1,NFKBIB,PLCL1,IL1RAP,SMAD2,ACAA1,MED1,RRAS,RALB,NFKB2,PLCL2,RAP1A,NCOA3,ADCY9,ACADL,TGFB3,PLCB3,MAP2K3,INSR,MED23,RALA,IL1RL1,BMPR2,JAK2,PLCH1,PLCD1,HSP90B1,NFKBIA,JUN,TGFB2,CLOCK,SMAD4,CHUK,GOT2,MAP2K7,GNAS,NRAS,ADCY6,GNAQ,IKBKE,TGS1,AIP,PLCB4,MAPK14,PRKAR2B,RRAS2,ADCY1,ADCY7,ACVR2A,PPARGC1A
p70S6K Signaling	1.91	0.0123	0.363	RALA,JAK1,MAPK1,BAD,PIK3R1,PPP2R5B,SOS2,PDPK1,PIK3R4,PLCH1,PLCD1,YWHAQ,MTOR,F2RL1,PIK3C3,MAPK3,AKT3,EEF2K,BCAP31,PLCL1,FRS2,PRKD1,AGT,ATM,PIK3C2B,IL4R,AKT2,NRAS,EEF2,YWHAB,RRAS,FGFR1,RALB,GNAI1,GNAQ,PLCL2,RAP1A,PPP2R5A,GNAI2,PLCB4,PPP2R1A,RRAS2,PRKCI,GAB1,PPP2R3A,PPP2R2B,PLCB3,PIK3CD,PPP2R1B
FLT3 Signaling in Hematopoietic Progenitor Cells	1.91	0.0123	0.386	RALA,BAD,MAPK1,PIK3R1,SOS2,RPS6KA3,PDPK1,MAPK13,PIK3R4,MAPK11,EIF4EBP1,MTOR,MAPK3,PIK3C3,CREB1,AKT3,STAT1,FRS2,ATM,PIK3C2B,AKT2,NRAS,RRAS,FGFR1,RALB,CREB3,CREB3L4,RAP1A,MAPK14,CBL,RRAS2,GAB1,PIK3CD,RPS6KA4
FAT10 Cancer Signaling Pathway	1.91	0.0123	0.435	SMAD2,EEF1A1,AKT2,TCF4,BMPR2,IKBKE,NFKB2,TGFBR2,IKBKG,NFKBIA,ACKR3,TGFB1,TGFB3,TGFB2,AKT3,SMAD4,CHUK,TNFRSF1B,CTNNB1,ACVR2A
Non-Small Cell Lung Cancer Signaling	1.9	0.0126	0.388	RALA,BAD,MAPK1,PIK3R1,SOS2,CDK4,PDPK1,PIK3R4,CCND1,STK4,CASP9,MAPK3,PIK3C3,AKT3,RASSF5,RXRB,FRS2,RASSF1,ATM,PIK3C2B,AKT2,FHIT,NRAS,RRAS,FGFR1,RALB,CDK6,RAP1A,SIN3A,RRAS2,GAB1,E2F1,PIK3CD
IL-7 Signaling Pathway	1.9	0.0126	0.388	JAK1,BAD,MAPK1,PIK3R1,SOS2,PDPK1,MAPK13,PIK3R4,BCL6,MAPK11,CCND1,JUN,CCND3,HGF,MAPK3,PIK3C3,AKT3,STAT1,FRS2,CDC25A,ATM,PIK3C2B,AKT2,SLC2A1,FGFR1,BAX,MET,MAPK14,GAB1,FOXO6,FOXO1,PIK3CD,CDKN1B
HIPPO signaling	1.89	0.0129	0.392	TEAD4,SAV1,PPP1R3C,PPP2R5B,PPP1CB,LATS2,PPP1R14B,CSNK1E,YWHAQ,STK4,PPP1R10,PPP1R7,SMAD4,MOB1A,PPP1CA,SMAD1,TEAD2,AMOT,LATS1,RASSF1,SMAD2,YWHAB,PPP2R5A,SKP2,PPP2R1A,DLG5,PPP2R3A,PPP2R2B,SCRIB,BTRC,PPP2R1B
NRF2-mediated Oxidative Stress Response	1.89	0.0129	0.348	MAPK1,DNAJB4,PIK3R1,GCLC,PIK3R4,CLPP,GSTZ1,SOD2,SCARB1,MAPK3,DNAJC8,DNAJA3,FOSL1,UBE2E3,FRS2,CBR1,PRKD1,ATM,PIK3C2B,RRAS,FGFR1,RALB,DNAJC19,MAFF,DNAJB14,RAP1A,GAB1,ACTA2,STIP1,DNAJC18,MAP2K3,PIK3CD,ABCC4,GSTP1,FTH1,EPHX1,USP14,RALA,NQO2,HSPB8,DNAJA4,DNAJC13,JUN,DNAJC4,PIK3C3,UBE2K,GSTM4,DNAJB1,FKBP5,GSTM1,MAP2K7,NRAS,MAP3K1,SOD1,MAFK,GSTO1,DNAJC11,FTL,MAPK14,PRKCI,RRAS2,MGST2,DNAJB11,GSTO2,DNAJB5
Actin Nucleation by ARP-WASP Complex	1.88	0.0132	0.414	ITGB1,ACTR2,RALA,NRAS,PPP1R12C,RRAS,RALB,SOS2,ITGA5,WASF1,RHOJ,NCK1,RAP1A,ROCK2,ROCK1,RRAS2,RHOG,RHOB,RHOD,ARPC2,RHOU,VASP,ARPC4,FNBP1
Colorectal Cancer Metastasis Signaling	1.83	0.0148	0.336	WNT10B,JAK1,MAPK1,MMP3,BAD,FZD3,PIK3R1,SOS2,PIK3R4,CCND1,PTGER1,GNB1,TGFBR2,CASP9,RHOG,RHOB,TGFB1,MAPK3,FRS2,GNG12,WNT5B,ATM,SMAD2,PIK3C2B,AKT2,CASP3,RRAS,FGFR1,IL6R,RALB,RHOJ,NFKB2,TCF3,RAP1A,APC,TLR2,ADCY9,BCL2L1,MMP23B,GAB1,TGFB3,GNB2,LEF1,PIK3CD,Tcf7,FNBP1,TCF4,RALA,VEGFB,JAK2,PDGFC,GNG7,MLH1,GNG11,JUN,ARRB1,RHOD,PIK3C3,TGFB2,RHOU,SMAD4,AKT3,CTNNB1,STAT1,PTGER4,LRP5,NRAS,GNAS,MMP28,DVL1,ADCY6…
Renal Cell Carcinoma Signaling	1.81	0.0155	0.386	RALA,MAPK1,PIK3R1,SOS2,CRK,HIF1A,PIK3R4,ARNT,JUN,TGFB1,PIK3C3,HGF,MAPK3,AKT3,EGLN3,FRS2,ATM,ETS1,PIK3C2B,AKT2,NRAS,SLC2A1,RRAS,FGFR1,RALB,RAP1A,MET,RRAS2,GAB1,CUL2,PAK2,PIK3CD
Cyclins and Cell Cycle Regulation	1.8	0.0158	0.39	PPP2R5B,CDK4,CCNB2,HDAC10,CCND1,CDKN2B,CCNA2,CCND3,TGFB1,TGFB2,CDC25A,ATM,HDAC9,CDK7,CDK6,PPP2R5A,SIN3A,CCNB1,SKP2,PPP2R1A,CCND2,HDAC3,PPP2R3A,E2F1,PPP2R2B,TGFB3,BTRC,ATR,CDKN1B,PPP2R1B
Assembly of RNA Polymerase II Complex	1.79	0.0162	0.426	POLR2F,TAF6,POLR2D,CDK7,TBP,POLR2H,POLR2K,POLR2B,TAF9B,POLR2G,TAF4B,GTF2B,TAF6L,TAF5,GTF2H4,GTF2E1,ERCC3,DR1,GTF2H5,GTF2H1
Thrombin Signaling	1.75	0.0178	0.34	CAMK1,MAPK1,PIK3R1,PDPK1,ARHGEF1,MAPK13,PIK3R4,Ppp1r12b,ROCK2,GNB1,RHOG,CAMK2D,RHOB,MAPK3,GNA13,PLCL1,FRS2,GNG12,PRKD1,ATM,PIK3C2B,AKT2,RRAS,FGFR1,RALB,TBP,RHOJ,PLCL2,NFKB2,RAP1A,MYL9,ADCY9,GAB1,GNAO1,GNB2,PLCB3,PIK3CD,ARHGEF9,FNBP1,RALA,CAMK4,PPP1CB,MYLK,MAPK11,PLCH1,GNG7,PLCD1,GNG11,RHOD,PIK3C3,CREB1,RHOU,AKT3,MYL12B,MYL12A,NRAS,ARHGEF12,GNAS,ADCY6,GNAQ,GNAI1,GNAI2,ROCK1,PLCB4,MAPK14,PRKCI,RRAS…
Tumoricidal Function of Hepatic Natural Killer Cells	1.73	0.0186	0.5	FADD,M6PR,CASP6,SERPINB9,CASP9,CASP3,BID,BAX,DFFA,FAS,CASP7
VEGF Signaling	1.73	0.0186	0.368	RALA,EIF2B4,BAD,MAPK1,PIK3R1,SOS2,Actn3,VEGFB,HIF1A,PIK3R4,PDGFC,ARNT,ROCK2,MAPK3,PIK3C3,AKT3,FRS2,EIF1AY,ATM,PIK3C2B,AKT2,NRAS,FLT1,RRAS,FGFR1,RALB,FLT4,EIF2S3,RAP1A,ROCK1,BCL2L1,RRAS2,ACTA2,GAB1,FOXO1,EIF2B1,EIF2B5,PIK3CD,EIF1AX
14-3-3-mediated Signaling	1.71	0.0195	0.356	RALA,BAD,MAPK1,PIK3R1,PIK3R4,PLCH1,TUBB2B,YWHAQ,PLCD1,JUN,PIK3C3,MAPK3,TSC2,AKT3,PDCD6IP,PLCL1,FRS2,PRKD1,AKT1S1,ATM,PIK3C2B,AKT2,TUBB3,NRAS,YWHAB,RRAS,FGFR1,STRADA,EDC3,TUBB2A,RALB,TUBA4A,VIM,BAX,PLCL2,RAP1A,PLCB4,CBL,TUBA1A,PRKCI,RRAS2,TUBB6,GAB1,FOXO1,PLCB3,PIK3CD,CDKN1B,SNCA
Role of Osteoblasts, Osteoclasts and Chondrocytes in Rheumatoid Arthritis	1.7	0.02	0.336	WNT10B,MAPK1,MMP3,BAD,FZD3,PIK3R1,CSNK1A1,PIK3R4,ITGB3,IKBKG,CASP9,TGFB1,RUNX2,MAPK3,NFKBIB,FRS2,SMAD1,ADAMTS5,IL1RAP,WNT5B,ATM,PIK3C2B,AKT2,SMAD9,FGFR1,ITGA5,TCF3,GSN,APC,IL18,CBL,GAB1,IL1RN,MAP2K3,LEF1,PIK3CD,Tcf7,ADAM17,TCF4,CAMK4,SFRP2,Calm1 (includes others),IL1RL1,BMP3,BMPR2,TRADD,JUN,NFKBIA,IGF1,PPP3CB,DKK3,PIK3C3,SMAD4,AKT3,CHUK,CTNNB1,TNFRSF1B,ITGB1,LRP5,CTSK,MAP2K7,DLX5,CHP1,DVL1,IKBKE,…
L-cysteine Degradation III	1.7	0.02	1	MPST,GOT1,GOT2
Ceramide Signaling	1.69	0.0204	0.371	RALA,BAD,PIK3R1,SPHK2,PPP2R5B,PIK3R4,KSR1,CTSD,JUN,PIK3C3,MAPK3,SPHK1,AKT3,TNFRSF1B,SMPD3,FRS2,ATM,PIK3C2B,AKT2,NRAS,RRAS,FGFR1,MAP3K1,RALB,NFKB2,RAP1A,PPP2R5A,S1PR3,PPP2R1A,RRAS2,GAB1,PPP2R3A,PPP2R2B,S1PR1,PIK3CD,PPP2R1B
Thyroid Cancer Signaling	1.69	0.0204	0.422	TCF4,RALA,NRAS,MAPK1,GDNF,RRAS,RALB,NGF,TCF3,CCND1,RAP1A,RRAS2,NTRK3,MAPK3,LEF1,CTNNB1,RXRB,Tcf7,TCF7L2
Actin Cytoskeleton Signaling	1.68	0.0209	0.336	MYH9,MAPK1,PIK3R1,SOS2,ARHGEF1,LIMK2,TLN1,PIK3R4,SLC9A1,LIMK1,Ppp1r12b,ROCK2,MAPK3,GNA13,SSH2,FRS2,GNG12,ATM,PIK3C2B,ACTR2,TIAM1,CFL1,RRAS,CRKL,FGFR1,RALB,RDX,ITGA5,WASF1,GSN,RAP1A,APC,FGF17,MYL9,TIAM2,TLN2,GAB1,ACTA2,CYFIP1,ARPC2,CD14,PIK3CD,PDGFD,FGD3,RALA,FGF2,Actn3,PPP1CB,MYLK,CRK,IQGAP1,PDGFC,IQGAP2,DIAPH1,FLNA,PIK3C3,PFN2,MYL12B,MYL12A,VAV2,ITGB1,NRAS,ARHGEF12,CSK,BRK1,GIT1,ROCK1,RRAS2,APC2…
Antiproliferative Role of TOB in T Cell Signaling	1.68	0.0209	0.48	TGFBR2,PABPC1,SMAD2,CCNA2,MAPK1,TGFB1,PABPC4,TGFB3,TGFB2,SMAD4,CDKN1B,SKP2
Phosphatidylglycerol Biosynthesis II (Non-plastidic)	1.68	0.0209	0.48	AGPAT4,GPAM,TAMM41,AGPAT5,LPCAT3,LPCAT2,LCLAT1,AGPAT2,CRLS1,MBOAT1,AGPAT1,AGPAT3
Docosahexaenoic Acid (DHA) Signaling	1.68	0.0209	0.412	PIK3C2B,AKT2,CASP3,BAD,PIK3R1,FGFR1,SERPINF1,PDPK1,BAX,PIK3R4,APP,BCL2L1,CASP9,GAB1,FOXO1,PIK3C3,AKT3,BID,PIK3CD,FRS2,ATM
Zymosterol Biosynthesis	1.67	0.0214	0.8	HSD17B7,TM7SF2,CYP51A1,LBR
Glioblastoma Multiforme Signaling	1.67	0.0214	0.345	WNT10B,MAPK1,FZD3,PIK3R1,SOS2,PIK3R4,CCND1,PTEN,RHOG,RHOB,MAPK3,TSC2,PLCL1,FRS2,WNT5B,ATM,PDGFRB,PIK3C2B,AKT2,RRAS,FGFR1,RALB,CDK6,RHOJ,PLCL2,TCF3,RAP1A,APC,IGF2,GAB1,E2F1,PLCB3,PIK3CD,LEF1,PDGFD,FNBP1,RALA,CDK4,PDGFC,PLCH1,PLCD1,MTOR,IGF1,RHOD,PIK3C3,IGF1R,RHOU,AKT3,CTNNB1,NRAS,FZD8,PLCB4,RRAS2,FOXO1,NF1,CDKN1B,WNT5A
Angiopoietin Signaling	1.65	0.0224	0.376	RALA,BAD,PIK3R1,CRK,NCK1,PIK3R4,IKBKG,CASP9,NFKBIA,PIK3C3,AKT3,CHUK,NFKBIB,FRS2,ATM,PIK3C2B,AKT2,NRAS,ANGPT1,RRAS,DOK2,FGFR1,RALB,IKBKE,NFKB2,RAP1A,ANGPTL1,RRAS2,FOXO1,GAB1,PAK2,PIK3CD
Glioma Signaling	1.65	0.0224	0.358	CAMK4,Calm1 (includes others),CAMK1,RALA,MAPK1,PIK3R1,SOS2,CDK4,RBL1,PIK3R4,CCND1,CDKN2B,PDGFC,PTEN,MTOR,CAMK2D,IGF1,MAPK3,PIK3C3,IGF1R,AKT3,FRS2,PRKD1,PDGFRB,ATM,PIK3C2B,RBL2,AKT2,NRAS,RRAS,FGFR1,RALB,CDK6,RAP1A,IGF2R,SIN3A,IGF2,PRKCI,RRAS2,GAB1,E2F1,PIK3CD,PDGFD
Regulation of IL-2 Expression in Activated and Anergic T Lymphocytes	1.64	0.0229	0.378	Calm1 (includes others),CAMK4,RALA,MAPK1,SOS2,TGFBR2,IKBKG,NFKBIA,JUN,PPP3CB,TGFB1,MAPK3,TGFB2,SMAD4,CHUK,NFKBIB,VAV2,SMAD2,MAP2K7,NRAS,RRAS,MAP3K1,CHP1,RALB,IKBKE,NFKB2,MALT1,RAP1A,RRAS2,TGFB3,TRA
Inhibition of Angiogenesis by TSP1	1.63	0.0234	0.452	TGFBR2,HSPG2,CD47,AKT2,MAPK14,JUN,CASP3,MAPK1,THBS1,TGFB1,GUCY1A2,AKT3,MAPK13,MAPK11
IL-17A Signaling in Fibroblasts	1.63	0.0234	0.452	MAPK1,CEBPD,IKBKE,MAPK13,NFKB2,IL17RA,MAPK11,IKBKG,NFKBIA,MAPK14,JUN,MAPK3,CHUK,NFKBIB
CDK5 Signaling	1.62	0.024	0.367	RALA,MAPK1,PPP1R3C,PPP2R5B,PPP1CB,MAPK13,NGF,PPP1R14B,MAPK11,PPP1R10,PPP1R7,MAPK3,PPP1CA,ITGB1,GNAS,NRAS,RRAS,PPP1R1B,CABLES1,RALB,ADCY6,RAP1A,CACNA1A,PPP2R5A,FOSB,ADCY9,PPP2R1A,MAPK14,PRKAR2B,RRAS2,PPP2R3A,CAPN1,ADCY1,PPP2R2B,PPP2R1B,ADCY7
PI3K Signaling in B Lymphocytes	1.62	0.024	0.354	CAMK4,Calm1 (includes others),RALA,ATF7,MAPK1,PIK3R1,PDPK1,ATF6,PLEKHA4,PLCH1,PTEN,PLCD1,IKBKG,NFKBIA,CAMK2D,JUN,PPP3CB,MAPK3,CREB1,AKT3,CHUK,PLCL1,NFKBIB,VAV2,AKT2,IL4R,C3,NRAS,ATF1,RRAS,CHP1,RALB,IKBKE,MALT1,NFKB2,PLCL2,RAP1A,TLR4,PLCB4,CBL,PRKCI,RRAS2,DAPP1,PLCB3,PIK3CD,PLEKHA1
TR/RXR Activation	1.61	0.0245	0.368	CAMK4,PIK3R1,HIF1A,PIK3R4,MTOR,SCARB1,NCOA2,FASN,PIK3C3,SLC16A2,AKT3,TBL1XR1,RXRB,FRS2,ATM,PIK3C2B,AKT2,SLC2A1,GPS2,MED1,FGFR1,THRA,PFKP,NCOA3,LDLR,HDAC3,GAB1,SREBF2,SREBF1,NCOA1,PIK3CD,STRBP,ACACA,RCAN2,PPARGC1A
NF-Œ∫B Activation by Viruses	1.61	0.0245	0.368	RALA,MAPK1,PIK3R1,PIK3R4,ITGB3,IKBKG,NFKBIA,PIK3C3,MAPK3,ITGAV,AKT3,CHUK,NFKBIB,FRS2,PRKD1,ATM,ITGB1,PIK3C2B,AKT2,NRAS,RRAS,FGFR1,MAP3K1,RALB,TBP,ITGA5,IKBKE,NFKB2,RAP1A,PRKCI,RIPK1,RRAS2,GAB1,PIK3CD,EIF2AK2
Endocannabinoid Developing Neuron Pathway	1.61	0.0245	0.354	RALA,MAPK1,PIK3R1,MAPK13,PIK3R4,MAPK11,CCND1,GNG7,GNB1,MTOR,GNG11,MAPK3,PIK3C3,CREB1,AKT3,CTNNB1,FRS2,AKT1S1,ATM,PIK3C2B,AKT2,MAP2K7,NRAS,RRAS,FGFR1,RALB,CREB3,GNAI1,ADCY6,CREB3L4,RAP1A,MLST8,GNAI2,ADCY9,MAPK14,PRKAR2B,RRAS2,GAB1,ARAF,GNAO1,ADCY1,PIK3CD,MAP2K3,CDKN1B,ADCY7
UVA-Induced MAPK Signaling	1.61	0.0245	0.36	RALA,MAPK1,PIK3R1,RPS6KA3,PARP12,MAPK13,PIK3R4,MAPK11,PLCH1,PLCD1,MTOR,CASP9,JUN,MAPK3,PIK3C3,RPS6KB2,PARP11,PLCL1,STAT1,SMPD3,FRS2,ATM,PIK3C2B,NRAS,CASP3,RRAS,FGFR1,PARP10,RALB,TNKS2,PLCL2,RAP1A,BCL2L1,PLCB4,MAPK14,RRAS2,GAB1,PLCB3,PIK3CD,RPS6KA4
Cell Cycle: G1/S Checkpoint Regulation	1.6	0.0251	0.391	PAK1IP1,CDK4,HDAC10,RBL1,CCND1,CDKN2B,CCND3,TGFB1,TGFB2,SMAD4,ATM,CDC25A,HDAC9,RBL2,CDK6,SIN3A,SKP2,HDAC3,CCND2,FOXO1,E2F1,TGFB3,BTRC,ATR,CDKN1B
Apelin Endothelial Signaling Pathway	1.6	0.0251	0.355	CAMK4,Calm1 (includes others),RALA,PRKAB1,MAPK1,PIK3R1,HIF1A,PIK3R4,ARNT,MTOR,JUN,MAPK3,PIK3C3,RPS6KB2,PRKAA1,AKT3,GNA13,KLF2,FRS2,PRKD1,ATM,PIK3C2B,AKT2,NRAS,GNAS,ANGPT1,RRAS,FGFR1,RALB,GNAI1,ADCY6,NFKB2,RAP1A,GNAI2,ADCY9,PLCB4,PRKCI,RRAS2,GAB1,GNAO1,ADCY1,PLCB3,PIK3CD,ADCY7
Human Embryonic Stem Cell Pluripotency	1.59	0.0257	0.35	TCF4,WNT10B,FZD3,FGF2,PIK3R1,BMP3,BMPR2,PDPK1,NGF,PIK3R4,PDGFC,NOG,TGFBR2,TGFB1,PIK3C3,TGFB2,SPHK1,SMAD4,AKT3,CTNNB1,SMAD1,FRS2,WNT5B,PDGFRB,ATM,SMAD2,PIK3C2B,AKT2,GNAS,FGFR1,DVL1,SMAD7,TCF3,BMP5,APC,S1PR3,FZD8,GAB1,FOXO1,NTRK3,S1PR1,TGFB3,PIK3CD,LEF1,PDGFD,Tcf7,TCF7L2,WNT5A
IL-1 Signaling	1.59	0.0257	0.371	TOLLIP,MAPK1,MAPK13,MAPK11,GNG7,GNB1,IKBKG,JUN,GNG11,NFKBIA,GNA13,CHUK,NFKBIB,IL1RAP,GNG12,MAP2K7,GNAS,MYD88,MAP3K1,GNAQ,ADCY6,GNAI1,IKBKE,NFKB2,GNAI2,ADCY9,MAPK14,PRKAR2B,GNAO1,ADCY1,GNB2,MAP2K3,ADCY7
ILK Signaling	1.59	0.0257	0.339	MYH9,MAPK1,PIK3R1,PPP2R5B,PDPK1,PIK3R4,RICTOR,CCND1,PPP1R14B,PTEN,ITGB3,PARVB,RHOG,RHOB,MAPK3,FRS2,ATM,PIK3C2B,AKT2,CFL1,CASP3,FGFR1,SNAI1,CREB3,RHOJ,NFKB2,CREB3L4,MYL9,PPP2R1A,ACTA2,GAB1,PPP2R3A,PPP2R2B,PIK3CD,LEF1,RSU1,FNBP1,SNAI2,ILK,Actn3,VEGFB,HIF1A,PDGFC,MTOR,JUN,FLNA,RHOD,PIK3C3,CREB1,RHOU,AKT3,ILKAP,CTNNB1,ITGB1,PARVA,LIMS2,VIM,PPP2R5A,FLNC,RPS6KA4,PTGS2,PPP2R1B
Amyloid Processing	1.58	0.0263	0.408	CAPN5,AKT2,MAPK1,PSENEN,MARK1,CSNK1A1,BACE1,PSEN2,MAPK13,MAPK11,APP,CSNK1E,MAPK14,PRKAR2B,CAPNS1,CAPN1,MAPK3,AKT3,CAPN2,BACE2
CCR3 Signaling in Eosinophils	1.55	0.0282	0.352	CAMK4,Calm1 (includes others),RALA,MAPK1,PIK3R1,PPP1CB,LIMK2,MYLK,MAPK13,PIK3R4,MAPK11,GNG7,LIMK1,Ppp1r12b,ROCK2,GNB1,GNG11,MAPK3,PIK3C3,FRS2,PRKD1,GNG12,ATM,PIK3C2B,NRAS,GNAS,CFL1,RRAS,FGFR1,RALB,GNAI1,CCL11,RAP1A,GNAI2,ROCK1,PLA2G4A,PLCB4,MAPK14,PRKCI,RRAS2,GAB1,PAK2,GNB2,PLCB3,PIK3CD
Parkinson's Signaling	1.55	0.0282	0.533	CASP9,MAPK14,MAPK1,PARK7,CASP3,MAPK13,SNCA,MAPK11
Myc Mediated Apoptosis Signaling	1.55	0.0282	0.377	RALA,BAD,PIK3R1,SOS2,PIK3R4,FAS,YWHAQ,CASP9,IGF1,PIK3C3,IGF1R,BID,AKT3,FRS2,ATM,PIK3C2B,AKT2,NRAS,CASP3,RRAS,YWHAB,FGFR1,RALB,BAX,RAP1A,FADD,RRAS2,GAB1,PIK3CD
LPS-stimulated MAPK Signaling	1.53	0.0295	0.366	RALA,MAPK1,PIK3R1,MAPK13,PIK3R4,MAPK11,IKBKG,JUN,NFKBIA,PIK3C3,MAPK3,CREB1,CHUK,NFKBIB,FRS2,PRKD1,ATM,PIK3C2B,NRAS,ATF1,RRAS,FGFR1,RALB,IKBKE,NFKB2,RAP1A,TLR4,MAPK14,PRKCI,RRAS2,GAB1,CD14,PIK3CD,MAP2K3
NF-Œ∫B Signaling	1.53	0.0295	0.339	TRAF3,PIK3R1,PIK3R4,TGFBR2,IKBKG,LTBR,NFKBIB,FRS2,ATM,PDGFRB,PIK3C2B,AKT2,RRAS,FGFR1,RALB,NFKB2,MALT1,RAP1A,TLR2,IL18,GAB1,ARAF,IL1RN,PIK3CD,INSR,TRA,AZI2,RALA,UBE2N,BMPR2,NGF,TANK,TRADD,NFKBIA,PIK3C3,UBE2V1,IGF1R,AKT3,CHUK,TNFRSF1B,MAP2K7,NRAS,FLT1,MYD88,RELB,FLT4,MAP3K1,IGF2R,FADD,TLR4,RIPK1,RRAS2,TLR5,NTRK3,BTRC,EIF2AK2,TIRAP,MAP3K3
RAR Activation	1.52	0.0302	0.337	MAPK1,PIK3R1,PDPK1,MAPK13,RBP1,PTEN,TGFB1,SMAD1,PRKD1,SMAD2,AKT2,SMAD9,MED1,CDK7,NFKB2,CRABP1,ADCY9,ADH7,ERCC3,TGFB3,IGFBP3,NCOA1,GTF2H1,PIK3CD,PML,CRABP2,REL,PBRM1,ADH1C,JAK2,RPL7A,MAPK11,TRIM24,JUN,PNRC1,TGFB2,GTF2H5,SMAD4,AKT3,RXRB,MAPKAPK2,DHRS3,SRA1,IL3RA,RDH11,CSK,RELB,MAP3K1,SMAD7,SMARCE1,ADCY6,SMARCD1,BRD7,PRKCI,MAPK14,PRKAR2B,GTF2H4,ADCY1,SMARCC1,ADCY7,PPARGC1A
Lymphotoxin Œ≤ Receptor Signaling	1.52	0.0302	0.382	TRAF3,MAPK1,PIK3R1,PDPK1,PIK3R4,IKBKG,CASP9,NFKBIA,MAPK3,PIK3C3,AKT3,LTBR,CHUK,FRS2,ATM,PIK3C2B,AKT2,CASP3,FGFR1,RELB,IKBKE,NFKB2,BCL2L1,GAB1,PIK3CD,BIRC2
JAK/Stat Signaling	1.52	0.0302	0.367	PIAS2,JAK1,RALA,MAPK1,PIK3R1,SOS2,JAK2,PIK3R4,MTOR,JUN,PIK3C3,MAPK3,SOCS2,AKT3,STAT1,FRS2,ATM,PIK3C2B,AKT2,NRAS,RRAS,FGFR1,RALB,GNAQ,NFKB2,RAP1A,PIAS3,BCL2L1,RRAS2,GAB1,PIK3CD,SOCS7,SOCS5
Role of PI3K/AKT Signaling in the Pathogenesis of Influenza	1.51	0.0309	0.385	PIK3C2B,AKT2,MAPK1,CRKL,PIK3R1,FGFR1,GNAI1,CRK,NFKB2,IRF3,CCL5,PIK3R4,MLH1,GNAI2,NFKBIA,CASP9,GAB1,PIK3C3,MAPK3,AKT3,PIK3CD,NFKBIB,FRS2,PLAC8,ATM
autophagy	1.49	0.0324	0.396	STX17,ATG12,CTSK,VPS41,CTSO,ATG3,VPS33B,PIK3R4,CTSF,ATG9B,CTSZ,CTSD,MTOR,CTSA,WDFY3,CTSH,PIK3C3,LAMP1,MAP1LC3A,MAP1LC3B,VPS11
CD40 Signaling	1.47	0.0339	0.372	TRAF3,MAPK1,PIK3R1,MAPK13,PIK3R4,MAPK11,TANK,IKBKG,NFKBIA,JUN,MAPK3,PIK3C3,CHUK,MAPKAPK2,NFKBIB,FRS2,ATM,PIK3C2B,MAP2K7,ATF1,FGFR1,PTGS1,IKBKE,NFKB2,MAPK14,GAB1,MAP2K3,PIK3CD,PTGS2
Role of Tissue Factor in Cancer	1.46	0.0347	0.35	RALA,MAPK1,PIK3R1,RPS6KA3,LIMK2,JAK2,MAPK13,PIK3R4,MAPK11,PTEN,LIMK1,ITGB3,YES1,MTOR,ARRB1,F2RL1,MAPK3,PIK3C3,ITGAV,AKT3,GNA13,FRS2,ATM,ITGB1,PIK3C2B,AKT2,P4HB,NRAS,CFL1,CASP3,RRAS,FGFR1,RALB,GNAQ,PLAUR,RAP1A,BCL2L1,MAPK14,RRAS2,GAB1,PIK3CD,RPS6KA4,CYR61
NGF Signaling	1.46	0.0347	0.35	RALA,MAPK1,PIK3R1,SOS2,RPS6KA3,PDPK1,CRK,MAP3K4,NGF,PIK3R4,ROCK2,IKBKG,RHOG,MAPK3,PIK3C3,CREB1,RPS6KB2,Map3k7,AKT3,CHUK,SMPD3,FRS2,MAP3K2,ATM,PIK3C2B,AKT2,NRAS,RRAS,FGFR1,RALB,CREB3,MAP3K1,IKBKE,NFKB2,CREB3L4,BAX,RAP1A,ROCK1,RRAS2,GAB1,PIK3CD,RPS6KA4,MAP3K3
Type I Diabetes Mellitus Signaling	1.46	0.0347	0.362	JAK1,MAPK1,JAK2,MAPK13,MAPK11,FAS,TRADD,IKBKG,NFKBIA,CASP9,HLA-DMB,BID,SOCS2,CHUK,TNFRSF1B,NFKBIB,STAT1,PTPRN,IL1RAP,MAP2K7,ICA1,CASP3,MYD88,IKBKE,HSPD1,NFKB2,FADD,MAPK14,RIPK1,MAP2K3,SOCS7,SOCS5,CPE,TRA
Role of NFAT in Cardiac Hypertrophy	1.45	0.0355	0.329	CAMK1,MAPK1,PIK3R1,SOS2,CSNK1A1,HDAC10,MAPK13,PIK3R4,TGFBR2,GNB1,CAMK2D,TGFB1,MAPK3,PLCL1,FRS2,GNG12,PRKD1,ATM,PIK3C2B,AKT2,RRAS,FGFR1,RALB,PLCL2,RAP1A,CACNA1A,ADCY9,HDAC3,GAB1,TGFB3,GNB2,PLCB3,MAP2K3,PIK3CD,RALA,CAMK4,Calm1 (includes others),CACNB3,MAPK11,PLCH1,GNG7,PLCD1,GNG11,PPP3CB,IGF1,PIK3C3,IGF1R,TGFB2,AKT3,CACNB2,HDAC9,MAP2K7,NRAS,GNAS,CHP1,MAP3K1,ADCY6,GNAQ,GNAI1,SLC8A3,GNAI2,NKX2-5,PLCB…
RANK Signaling in Osteoclasts	1.43	0.0372	0.356	CAMK4,Calm1 (includes others),MAPK1,PIK3R1,MAPK13,MAP3K4,PIK3R4,MAPK11,IKBKG,JUN,NFKBIA,PPP3CB,MAPK3,PIK3C3,Map3k7,AKT3,CHUK,NFKBIB,FRS2,MAP3K2,ATM,PIK3C2B,AKT2,MAP2K7,FGFR1,CHP1,MAP3K1,IKBKE,NFKB2,GSN,MAPK14,CBL,GAB1,PIK3CD,MAP3K3,BIRC2
Melanoma Signaling	1.42	0.038	0.381	PIK3C2B,AKT2,RALA,NRAS,MAPK1,BAD,RRAS,PIK3R1,FGFR1,RALB,CDK4,PIK3R4,RAP1A,CCND1,PTEN,RRAS2,GAB1,PIK3C3,MAPK3,E2F1,AKT3,PIK3CD,FRS2,ATM
Heme Biosynthesis II	1.41	0.0389	0.625	UROD,FECH,ALAD,CPOX,HMBS
Semaphorin Signaling in Neurons	1.39	0.0407	0.392	ITGB1,ARHGEF12,FES,MAPK1,CFL1,DPYSL3,RHOJ,LIMK2,LIMK1,ROCK1,MET,ROCK2,RHOG,RHOB,RHOD,MAPK3,PAK2,RHOU,FNBP1,SEMA7A
Nucleotide Excision Repair Pathway	1.38	0.0417	0.424	POLR2F,POLR2D,CDK7,POLR2H,POLR2K,POLR2B,POLR2G,RPA3,GTF2H4,ERCC3,XPC,GTF2H5,GTF2H1,RAD23B
HIF1Œ± Signaling	1.38	0.0417	0.347	EPO,RALA,MMP3,MAPK1,PIK3R1,VEGFB,HIF1A,MAPK13,PIK3R4,MAPK11,PDGFC,LDHB,ARNT,JUN,EDN1,MAPK3,PIK3C3,EGLN3,AKT3,APEX1,FRS2,ATM,EGLN2,PIK3C2B,AKT2,NRAS,MMP28,SLC2A1,RRAS,FGFR1,COPS5,RALB,RAP1A,MAPK14,EGLN1,RRAS2,MMP23B,GAB1,CUL2,NCOA1,PIK3CD
IL-17 Signaling	1.36	0.0437	0.36	JAK1,RALA,MMP3,MAPK1,PIK3R1,JAK2,MAPK13,IL17RA,PIK3R4,MAPK11,JUN,PIK3C3,MAPK3,AKT3,MAPKAPK2,FRS2,ATM,PIK3C2B,AKT2,NRAS,RRAS,FGFR1,RALB,CCL11,RAP1A,RRAS2,MAPK14,GAB1,MAP2K3,PIK3CD,PTGS2
CNTF Signaling	1.35	0.0447	0.373	PIK3C2B,RALA,NRAS,JAK1,MAPK1,RRAS,CNTF,PIK3R1,FGFR1,RALB,RPS6KA3,JAK2,PIK3R4,RAP1A,MTOR,RRAS2,GAB1,PIK3C3,MAPK3,RPS6KB2,PIK3CD,RPS6KA4,STAT1,FRS2,ATM
Production of Nitric Oxide and Reactive Oxygen Species in Macrophages	1.35	0.0447	0.331	JAK1,APOB,MAPK1,PIK3R1,PPP2R5B,MAPK13,MAP3K4,PIK3R4,PPP1R14B,IKBKG,RHOG,RHOB,PPP1R7,MAPK3,Map3k7,NFKBIB,PPP1CA,FRS2,PRKD1,ATM,MAP3K2,PIK3C2B,AKT2,FGFR1,RHOJ,NFKB2,RAP1A,TLR2,PPP2R1A,GAB1,PPP2R3A,PPP2R2B,PIK3CD,FNBP1,APOD,PPP1R3C,PPP1CB,JAK2,MAPK11,NFKBIA,JUN,PPP1R10,RHOD,PIK3C3,RHOU,AKT3,CHUK,STAT1,TNFRSF1B,MAP2K7,MAP3K1,IKBKE,PPP2R5A,TLR4,PRKCI,MAPK14,MAP3K3,PPP2R1B,CLU
Glucocorticoid Receptor Signaling	1.34	0.0457	0.317	POLR2F,POLR2D,JAK1,MAPK1,PRKAB1,SGK1,PIK3R1,Hspa1b,SOS2,SLPI,MAPK13,PIK3R4,TGFBR2,IKBKG,TGFB1,MAPK3,PRKAA1,NFKBIB,FRS2,ATM,SMAD2,PIK3C2B,AKT2,RRAS,MED1,CDK7,FGFR1,HSPA9,RALB,TBP,POLR2H,POLR2K,RAP1A,NCOA3,TAF9B,TAF4B,BCL2L1,POU2F1,TAF5,GAB1,IL1RN,ERCC3,TGFB3,NCOA1,GTF2H1,PIK3CD,TRA,UBE2I,PBRM1,RALA,GTF2F2,JAK2,CCL5,POLR2B,MAPK11,NR3C1,GTF2B,HSP90B1,NFKBIA,JUN,PCK2,PPP3CB,NCOA2,PIK3C3,ANXA1,CREB1,T…
Ovarian Cancer Signaling	1.34	0.0457	0.338	TCF4,RALA,WNT10B,MAPK1,FZD3,PIK3R1,CDK4,VEGFB,PIK3R4,PDGFC,CCND1,MLH1,PTEN,MTOR,ARRB1,EDN1,PIK3C3,MAPK3,RPS6KB2,AKT3,CTNNB1,FRS2,WNT5B,ATM,PIK3C2B,PMS2,AKT2,NRAS,RRAS,FGFR1,DVL1,PTGS1,RALB,TCF3,RAP1A,SIN3A,APC,FZD8,RRAS2,PRKAR2B,GAB1,E2F1,EDNRA,PIK3CD,LEF1,PTGS2,Tcf7,TCF7L2,WNT5A
GADD45 Signaling	1.33	0.0468	0.474	CCND2,GADD45B,CCND3,CDK4,ATR,MAP3K4,CCND1,ATM,CCNB1
DNA damage-induced 14-3-3œÉ Signaling	1.33	0.0468	0.474	AKT2,RAD9A,HUS1,AKT3,CCNB2,ATR,ATM,RAD1,CCNB1
BMP signaling pathway	1.32	0.0479	0.364	RALA,CAMK4,MAPK1,BMP3,BMPR2,MAPK13,MAPK11,NOG,JUN,RUNX2,MAPK3,CREB1,SMAD4,SMAD1,FST,NRAS,SMAD9,RRAS,RALB,SMAD7,GREM1,NFKB2,BMP5,RAP1A,NKX2-5,RRAS2,PRKAR2B,MAPK14
PPAR Signaling	1.31	0.049	0.356	RALA,MAPK1,IL1RL1,SOS2,PDGFC,HSP90B1,IKBKG,NFKBIA,JUN,MAPK3,CHUK,NFKBIB,TNFRSF1B,IL1RAP,PDGFRB,SRA1,NRAS,RRAS,MED1,RALB,IKBKE,NFKB2,RAP1A,AIP,IL18,RRAS2,IL1RN,NCOA1,INSR,PTGS2,PDGFD,PPARGC1A
