# Supplementary material for: Epigenetic inheritance of circadian period in clonal cells
Source: eLife. 2020 May 27;9:e54186. doi: 10.7554/eLife.54186 (PMC7289596; doi:10.7554/eLife.54186)
Supplement: Figure 5—source data 1. [file elife-54186-fig5-data1.xlsx]

## Sheet: S1_DMRs
DMR_Chr	DMR_Start	DMR_End	PVal	QVal	Diff(SP-LP_Meth.Difference.Percentage)	Upstream_Chr	Upstream_Start	Upstream_End	Upstream_Gene	Upstream_Strand	Distance_to_UpstreamTSS	Downstream_Chr	Downstream_Start	Downstream_End	Downstream_Gene	Downstream_Strand	Distance_to_DownstreamTSS
chr1	3670001	3671000	1.67285e-09	1.10126e-07	0.392745	chr1	3214481	3671498	uc007aeu.1_Xkr4	-	0	chr1	4290845	4409241	uc007aew.1_Rp1	-	619846
chr1	3671001	3672000	1.17488e-06	1.79907e-05	0.398933	chr1	3214481	3671498	uc007aeu.1_Xkr4	-	0	chr1	4290845	4409241	uc007aew.1_Rp1	-	618846
chr1	3740001	3741000	6.37416e-05	0.000446749	-0.287567	chr1	3214481	3671498	uc007aeu.1_Xkr4	-	-68504	chr1	4290845	4409241	uc007aew.1_Rp1	-	549846
chr1	4041001	4042000	2.58174e-07	5.42615e-06	-0.271716	chr1	3214481	3671498	uc007aeu.1_Xkr4	-	-369504	chr1	4290845	4409241	uc007aew.1_Rp1	-	248846
chr1	4306001	4307000	2.57373e-11	4.27803e-09	-0.814921	chr1	4290845	4409241	uc007aew.1_Rp1	-	0	chr1	4343506	4360314	uc007aex.2_Rp1	-	36507
chr1	4492001	4493000	3.06842e-12	7.62828e-10	0.414729	chr1	4490927	4497354	uc033fhy.1_Sox17	-	0	chr1	4773199	4785726	uc007afd.3_Mrpl15	-	280200
chr1	4493001	4494000	1.52263e-12	4.23225e-10	0.384266	chr1	4490927	4497354	uc033fhy.1_Sox17	-	0	chr1	4773199	4785726	uc007afd.3_Mrpl15	-	279200
chr1	4496001	4497000	8.82346e-05	0.000581149	0.338553	chr1	4490927	4497354	uc033fhy.1_Sox17	-	0	chr1	4773199	4785726	uc007afd.3_Mrpl15	-	276200
chr1	4695001	4696000	2.99211e-05	0.000240852	-0.344069	chr1	4490927	4497354	uc033fhy.1_Sox17	-	-197648	chr1	4773199	4785726	uc007afd.3_Mrpl15	-	77200
chr1	4986001	4987000	1.66422e-09	1.09775e-07	0.45572	chr1	4909575	5070285	uc007afl.2_Rgs20	-	0	chr1	5083172	5099777	uc007afm.1_Atp6v1h	+	96173
chr1	5024001	5025000	4.15748e-06	4.92547e-05	-0.348335	chr1	4909575	5070285	uc007afl.2_Rgs20	-	0	chr1	5083172	5099777	uc007afm.1_Atp6v1h	+	58173
chr1	5166001	5167000	6.21627e-11	8.64524e-09	0.474017	chr1	5083172	5162549	uc007afn.1_Atp6v1h	+	-3453	chr1	5588492	5606133	uc007afo.2_Oprk1	+	421493
chr1	6213001	6214000	2.00569e-05	0.000174625	-0.36244	chr1	5913706	5917398	uc011whw.1_Npbwr1	-	-295604	chr1	6214661	6276104	uc007afr.2_Rb1cc1	+	662
chr1	6826001	6827000	0.000196511	0.00111814	-0.254917	chr1	6730050	6860940	uc007aga.1_St18	+	0	chr1	7088919	7173628	uc007agb.1_Pcmtd1	+	261920
chr1	7105001	7106000	0.000705371	0.00319348	0.309687	chr1	7088919	7173628	uc011why.1_Pcmtd1	+	0	chr1	7160084	7173628	uc007agd.1_Pcmtd1	+	54085
chr1	7122001	7123000	0.000280487	0.00149505	0.476074	chr1	7088919	7173628	uc011why.1_Pcmtd1	+	0	chr1	7160084	7173628	uc007agd.1_Pcmtd1	+	37085
chr1	7306001	7307000	2.90142e-05	0.000235131	-0.28872	chr1	7160084	7173628	uc007agd.1_Pcmtd1	+	-132374	chr1	7349405	7397869	uc007age.1_AK043789	-	42406
chr1	7681001	7682000	4.48695e-07	8.40199e-06	-0.44867	chr1	7375887	7397869	uc007agf.1_AK142999	-	-283133	chr1	8028518	8028555	uc029qmr.1_AB351889	-	346519
chr1	7682001	7683000	0.000137701	0.000836706	-0.296968	chr1	7375887	7397869	uc007agf.1_AK142999	-	-284133	chr1	8028518	8028555	uc029qmr.1_AB351889	-	345519
chr1	7756001	7757000	0.000366848	0.00186606	0.41689	chr1	7375887	7397869	uc007agf.1_AK142999	-	-358133	chr1	8028518	8028555	uc029qmr.1_AB351889	-	271519
chr1	8236001	8237000	2.57714e-05	0.000213702	0.305882	chr1	8179496	8179520	uc029qms.1_AB351889	-	-56482	chr1	8362660	8470519	uc007agg.1_Sntg1	-	125661
chr1	8373001	8374000	2.38131e-06	3.16341e-05	0.47275	chr1	8362660	9299730	uc011whz.1_Sntg1	-	0	chr1	8424720	8424766	uc029qmt.1_AB352479	-	50721
chr1	8468001	8469000	3.16962e-07	6.39188e-06	0.319042	chr1	8362660	9299730	uc011whz.1_Sntg1	-	0	chr1	8950563	9299730	uc011wib.1_Sntg1	-	481564
chr1	8700001	8701000	0.00205966	0.0077023	0.293616	chr1	8362660	9299730	uc011whz.1_Sntg1	-	0	chr1	8950563	9299730	uc011wib.1_Sntg1	-	249564
chr1	8720001	8721000	0.00722239	0.0215381	0.268447	chr1	8362660	9299730	uc011whz.1_Sntg1	-	0	chr1	8950563	9299730	uc011wib.1_Sntg1	-	229564
chr1	9357001	9358000	2.07681e-08	7.56101e-07	-0.574189	chr1	8950563	9299730	uc011wib.1_Sntg1	-	-57272	chr1	9545407	9547455	uc007agk.2_Rrs1	+	187408
chr1	9985001	9986000	5.83975e-07	1.0337e-05	-0.304714	chr1	9968625	10009130	uc007ahc.1_Ppp1r42	-	0	chr1	9995062	10009130	uc007ahd.1_Ppp1r42	-	9063
chr1	10055001	10056000	0.000137739	0.000836861	-0.26904	chr1	10046492	10136768	uc011wih.1_Cspp1	+	0	chr1	10137506	10232670	uc007ahn.1_Arfgef1	-	81507
chr1	10451001	10452000	0.00212564	0.00790559	0.366521	chr1	10324718	10719945	uc007ahr.2_Cpa6	-	0	chr1	10708386	10708415	uc029qmw.1_Mir467e	-	256387
chr1	10529001	10530000	0.000299457	0.00157863	0.360853	chr1	10324718	10719945	uc007ahr.2_Cpa6	-	0	chr1	10708386	10708415	uc029qmw.1_Mir467e	-	178387
chr1	11281001	11282000	3.23634e-05	0.000256565	0.323812	chr1	11263962	11303682	uc007ahv.2_Prex2	+	0	chr1	11414104	11596317	uc011wii.1_A830018L16Rik	+	132105
chr1	12704001	12705000	1.42379e-07	3.41573e-06	-0.418672	chr1	12692429	12860372	uc007aib.2_Sulf1	+	0	chr1	12718544	12822916	uc007aic.1_Sulf1	+	13545
chr1	12871001	12872000	2.42457e-06	3.21149e-05	0.310717	chr1	12866549	12991135	uc007aif.1_Slco5a1	-	0	chr1	12878594	12990963	uc007aig.1_Slco5a1	-	6595
chr1	12939001	12940000	0.00727103	0.021657	-0.26994	chr1	12878594	12991135	uc007aii.1_Slco5a1	-	0	chr1	13113427	13127163	uc007aik.1_Prdm14	-	173428
chr1	12990001	12991000	5.69568e-08	1.6604e-06	0.265772	chr1	12878594	12991135	uc007aii.1_Slco5a1	-	0	chr1	13113427	13127163	uc007aik.1_Prdm14	-	122428
chr1	13020001	13021000	2.93516e-07	6.01297e-06	0.374348	chr1	12878594	12991135	uc007aii.1_Slco5a1	-	-28867	chr1	13113427	13127163	uc007aik.1_Prdm14	-	92428
chr1	13054001	13055000	9.63241e-82	6.42572e-78	-0.757261	chr1	12878594	12991135	uc007aii.1_Slco5a1	-	-62867	chr1	13113427	13127163	uc007aik.1_Prdm14	-	58428
chr1	13089001	13090000	1.07374e-05	0.000105766	0.267689	chr1	12878594	12991135	uc007aii.1_Slco5a1	-	-97867	chr1	13113427	13127163	uc007aik.1_Prdm14	-	23428
chr1	13104001	13105000	7.87219e-08	2.14171e-06	0.301921	chr1	12878594	12991135	uc007aii.1_Slco5a1	-	-112867	chr1	13113427	13127163	uc007aik.1_Prdm14	-	8428
chr1	13126001	13127000	1.52217e-09	1.02465e-07	0.259228	chr1	13113427	13127163	uc007aik.1_Prdm14	-	0	chr1	13139158	13372439	uc007ail.1_Ncoa2	-	12159
chr1	13223001	13224000	6.76498e-13	2.1388e-10	-0.412177	chr1	13184605	13374083	uc007air.1_Ncoa2	-	0	chr1	13343587	13347054	uc007ais.1_AK171953	-	119588
chr1	14092001	14093000	0.00542703	0.0170379	0.283241	chr1	13785684	13786929	uc011wil.1_Gm5523	-	-305073	chr1	14168957	14304570	uc007aiw.1_Eya1	-	75958
chr1	14748001	14749000	7.30956e-11	9.86412e-09	-0.495221	chr1	14168957	14310199	uc007aiz.1_Eya1	-	-437803	chr1	14753345	14755966	uc007aja.2_Msc	-	4346
chr1	15548001	15549000	0.017407	0.0442394	-0.25687	chr1	15312451	15714214	uc007aje.1_Kcnb2	+	0	chr1	15805645	15822013	uc007ajf.2_Terf1	+	256646
chr1	15757001	15758000	4.3871e-06	5.14071e-05	0.533675	chr1	15312451	15714214	uc007aje.1_Kcnb2	+	-42788	chr1	15805645	15822013	uc007ajf.2_Terf1	+	47646
chr1	15965001	15966000	1.20176e-05	0.00011579	-0.395342	chr1	15853861	15892722	uc007ajj.1_Sbspon	-	-72280	chr1	16065978	16093041	uc029qmy.1_4930444P10Rik	-	99979
chr1	15996001	15997000	6.52749e-46	1.45148e-42	0.45105	chr1	15853861	15892722	uc007ajj.1_Sbspon	-	-103280	chr1	16065978	16093041	uc029qmy.1_4930444P10Rik	-	68979
chr1	16092001	16093000	1.14771e-08	4.7792e-07	0.373094	chr1	16065978	16093041	uc029qmz.1_4930444P10Rik	-	0	chr1	16101295	16104433	uc007ajl.3_Rpl7	-	8296
chr1	16093001	16094000	3.95599e-05	0.000301935	0.31219	chr1	16065978	16093041	uc029qmz.1_4930444P10Rik	-	0	chr1	16101295	16104433	uc007ajl.3_Rpl7	-	7296
chr1	16269001	16270000	4.83758e-07	8.93443e-06	0.529585	chr1	16228809	16519302	uc007ajo.2_Stau2	-	0	chr1	16344197	16519302	uc007ajq.2_Stau2	-	74198
chr1	16616001	16617000	2.77106e-05	0.000226344	0.35006	chr1	16584157	16619338	uc007aju.2_Ube2w	-	0	chr1	16642764	16656865	uc007ajv.1_Tceb1	-	25765
chr1	17251001	17252000	0.000391765	0.00196825	0.362815	chr1	17168404	17173103	uc007akd.1_AK135932	+	-77899	chr1	17352057	17352103	uc029qnb.1_AB350106	-	100058
chr1	17303001	17304000	0.00389961	0.0129986	-0.320276	chr1	17168404	17173103	uc007akd.1_AK135932	+	-129899	chr1	17352057	17352103	uc029qnb.1_AB350106	-	48058
chr1	17542001	17543000	0.000104162	0.000666168	-0.566103	chr1	17352057	17352103	uc029qnb.1_AB350106	-	-189899	chr1	17601900	17630939	uc007ake.2_Pi15	+	58901
chr1	18058001	18059000	1.74528e-09	1.13846e-07	0.355628	chr1	17727416	17766207	uc007akh.1_Crispld1	+	-291795	chr1	18115190	18137052	uc007aki.1_Crisp4	-	56191
chr1	18233001	18234000	0.000338203	0.00174434	0.251586	chr1	18210052	18223564	uc007akl.1_Defb44-ps	-	-9438	chr1	18236472	18237443	uc007akm.1_Defb18	-	2473
chr1	19096001	19097000	1.13737e-05	0.000110801	0.393202	chr1	18260523	18265138	uc007ako.1_Gm15386	-	-830864	chr1	19103021	19166332	uc007akp.1_Tfap2d	+	6022
chr1	19097001	19098000	1.77467e-07	4.05761e-06	0.424988	chr1	18260523	18265138	uc007ako.1_Gm15386	-	-831864	chr1	19103021	19166332	uc007akp.1_Tfap2d	+	5022
chr1	19109001	19110000	3.60983e-07	7.06254e-06	0.302316	chr1	19103021	19166332	uc007akp.1_Tfap2d	+	0	chr1	19208913	19238845	uc007akq.2_Tfap2b	+	98914
chr1	19111001	19112000	0.000289945	0.00153679	0.265942	chr1	19103021	19166332	uc007akp.1_Tfap2d	+	0	chr1	19208913	19238845	uc007akq.2_Tfap2b	+	96914
chr1	19122001	19123000	0.000587699	0.00274879	0.439668	chr1	19103021	19166332	uc007akp.1_Tfap2d	+	0	chr1	19208913	19238845	uc007akq.2_Tfap2b	+	85914
chr1	19187001	19188000	5.49172e-06	6.17963e-05	0.375263	chr1	19103021	19166332	uc007akp.1_Tfap2d	+	-20670	chr1	19208913	19238845	uc007akq.2_Tfap2b	+	20914
chr1	19234001	19235000	5.03117e-08	1.5073e-06	0.328106	chr1	19213926	19238845	uc007aku.2_Tfap2b	+	0	chr1	19284788	19284836	uc029qnc.1_AB353040	+	49789
chr1	19380001	19381000	8.06816e-07	1.33498e-05	0.396978	chr1	19284788	19284836	uc029qnc.1_AB353040	+	-95166	chr1	20057778	20618057	uc007akv.1_Pkhd1	-	676779
chr1	20142001	20143000	0.000100844	0.000648952	0.344161	chr1	20057778	20618057	uc007akv.1_Pkhd1	-	0	chr1	20356453	20392300	uc029qnd.1_4930486I03Rik	+	213454
chr1	20551001	20552000	1.71758e-07	3.96145e-06	-0.410016	chr1	20057778	20618057	uc007akv.1_Pkhd1	-	0	chr1	20592952	20618057	uc007akw.1_Pkhd1	-	40953
chr1	20719001	20720000	9.91364e-06	9.9137e-05	-0.533731	chr1	20669881	20682958	uc029qne.1_miR-133	+	-36044	chr1	20730904	20734496	uc007aky.1_Il17a	+	10905
chr1	20773001	20774000	2.5505e-05	0.000211989	-0.281901	chr1	20742680	20742719	uc029qnf.1_AB351293	-	-30283	chr1	20777145	20779554	uc007akz.2_Il17f	-	3146
chr1	20798001	20799000	6.01226e-09	2.93735e-07	-0.548516	chr1	20777145	20784270	uc007ala.2_Il17f	-	-13732	chr1	20803011	20803381	uc007alb.1_AK205147	+	4012
chr1	20954001	20955000	0.00331243	0.0113676	0.264046	chr1	20951625	20990841	uc007alf.2_Efhc1	+	0	chr1	21001396	21079225	uc007alg.2_Tram2	-	46397
chr1	21073001	21074000	0.000255148	0.00138444	0.259511	chr1	21001396	21079225	uc007alg.2_Tram2	-	0	chr1	21166497	21187627	uc007alh.1_AK138554	+	92498
chr1	21268001	21269000	6.5157e-09	3.11881e-07	0.347851	chr1	21240584	21265575	uc033fih.1_Gsta3	+	-2427	chr1	21285245	21298312	uc007alm.1_Gm4956	-	16246
chr1	21673001	21674000	1.24664e-05	0.000119299	-0.34049	chr1	21398402	21961942	uc011wio.1_Kcnq5	-	0	chr1	22288421	22315843	uc007alr.1_Rims1	-	614422
chr1	21960001	21961000	1.35849e-12	3.82919e-10	0.53076	chr1	21398402	21961942	uc011wio.1_Kcnq5	-	0	chr1	22288421	22315843	uc007alr.1_Rims1	-	327422
chr1	21961001	21962000	2.34561e-11	3.97479e-09	0.608026	chr1	21398402	21961942	uc011wio.1_Kcnq5	-	0	chr1	22288421	22315843	uc007alr.1_Rims1	-	326422
chr1	21962001	21963000	1.12596e-10	1.38243e-08	0.492137	chr1	21398402	21961942	uc011wio.1_Kcnq5	-	-60	chr1	22288421	22315843	uc007alr.1_Rims1	-	325422
chr1	22012001	22013000	2.16247e-06	2.92275e-05	-0.319712	chr1	21398402	21961942	uc011wio.1_Kcnq5	-	-50060	chr1	22288421	22315843	uc007alr.1_Rims1	-	275422
chr1	22208001	22209000	8.05452e-06	8.37717e-05	0.315146	chr1	21398402	21961942	uc011wio.1_Kcnq5	-	-246060	chr1	22288421	22315843	uc007alr.1_Rims1	-	79422
chr1	22238001	22239000	7.23152e-07	1.22243e-05	0.322208	chr1	21398402	21961942	uc011wio.1_Kcnq5	-	-276060	chr1	22288421	22315843	uc007alr.1_Rims1	-	49422
chr1	22257001	22258000	3.23067e-09	1.82486e-07	-0.678927	chr1	21398402	21961942	uc011wio.1_Kcnq5	-	-295060	chr1	22288421	22315843	uc007alr.1_Rims1	-	30422
chr1	22533001	22534000	9.13827e-11	1.17609e-08	0.308586	chr1	22468190	22805724	uc029qnm.1_Rims1	-	0	chr1	22593275	22805724	uc007aly.1_Rims1	-	59276
chr1	22534001	22535000	9.97386e-07	1.57667e-05	0.276914	chr1	22468190	22805724	uc029qnm.1_Rims1	-	0	chr1	22593275	22805724	uc007aly.1_Rims1	-	58276
chr1	22805001	22806000	5.50076e-10	4.68251e-08	0.532331	chr1	22593275	22805724	uc007aly.1_Rims1	-	0	chr1	23100473	23102253	uc007alz.1_4933415F23Rik	-	294474
chr1	22806001	22807000	6.09318e-09	2.96532e-07	0.321044	chr1	22593275	22805724	uc007aly.1_Rims1	-	-278	chr1	23100473	23102253	uc007alz.1_4933415F23Rik	-	293474
chr1	23012001	23013000	2.20803e-05	0.000188576	0.265538	chr1	22593275	22805724	uc007aly.1_Rims1	-	-206278	chr1	23100473	23102253	uc007alz.1_4933415F23Rik	-	87474
chr1	23154001	23155000	4.42027e-08	1.36534e-06	0.311665	chr1	23100473	23102253	uc007alz.1_4933415F23Rik	-	-51749	chr1	23272268	23272339	uc011wip.1_Mir30a	+	117269
chr1	23214001	23215000	2.34821e-07	5.03205e-06	-0.426075	chr1	23100473	23102253	uc007alz.1_4933415F23Rik	-	-111749	chr1	23272268	23272339	uc011wip.1_Mir30a	+	57269
chr1	23247001	23248000	9.96912e-08	2.57865e-06	0.289412	chr1	23100473	23102253	uc007alz.1_4933415F23Rik	-	-144749	chr1	23272268	23272339	uc011wip.1_Mir30a	+	24269
chr1	23722001	23723000	8.88063e-07	1.43861e-05	0.258554	chr1	23391748	23397772	uc007amc.1_AK090150	-	-324230	chr1	23761925	23815740	uc007amd.1_B3gat2	+	38926
chr1	23827001	23828000	1.04273e-06	1.63311e-05	-0.323169	chr1	23761925	23847858	uc007ame.1_B3gat2	+	0	chr1	23844845	23909736	uc007amf.1_Smap1	-	16846
chr1	23987001	23988000	3.55342e-07	6.97606e-06	0.29538	chr1	23845626	23922289	uc007amh.1_Smap1	-	-64713	chr1	23995938	24005640	uc007amj.2_1110058L19Rik	-	7939
chr1	24323001	24324000	3.70195e-06	4.49352e-05	-0.27428	chr1	24279769	24587437	uc007amr.1_Col19a1	-	0	chr1	24613970	24614812	uc007ams.1_Atpase6	-	289971
chr1	24766001	24767000	4.8341e-43	1.01836e-39	-0.263371	chr1	24678925	24766301	uc007amu.1_Lmbrd1	+	0	chr1	25067475	25229100	uc007amv.2_Bai3	-	300476
chr1	25016001	25017000	9.81136e-07	1.55724e-05	-0.447538	chr1	24678925	24766301	uc007amu.1_Lmbrd1	+	-249701	chr1	25067475	25229100	uc007amv.2_Bai3	-	50476
chr1	25992001	25993000	7.67366e-05	0.000519015	-0.395914	chr1	25934307	25934335	uc011wit.1_AB349959	+	-57667	chr1	26681800	26687460	uc007amz.2_4931408C20Rik	-	688801
chr1	26499001	26500000	1.73121e-06	2.44608e-05	0.364827	chr1	25934307	25934335	uc011wit.1_AB349959	+	-564667	chr1	26681800	26687460	uc007amz.2_4931408C20Rik	-	181801
chr1	27304001	27305000	3.89986e-06	4.68133e-05	0.329795	chr1	26681800	26687460	uc007amz.2_4931408C20Rik	-	-616542	chr1	27392075	27392105	uc029qno.1_DQ690302	+	87076
chr1	28024001	28025000	8.76299e-07	1.42359e-05	-0.495609	chr1	27884045	27902187	uc007ana.1_AK050085	+	-121815	chr1	28776121	28780252	uc007anb.1_Gm597	-	751122
chr1	28064001	28065000	0.0047927	0.0154044	-0.368438	chr1	27884045	27902187	uc007ana.1_AK050085	+	-161815	chr1	28776121	28780252	uc007anb.1_Gm597	-	711122
chr1	28932001	28933000	7.99473e-08	2.16466e-06	-0.619611	chr1	28776121	28780252	uc007anb.1_Gm597	-	-151750	chr1	29421487	29421612	uc033fii.1_Mir6342	+	488488
chr1	29559001	29560000	0.0179492	0.0453553	0.280267	chr1	29421487	29421612	uc033fii.1_Mir6342	+	-137390	chr1	30718553	30719961	uc007anc.1_AK087209	-	1158554
chr1	29722001	29723000	6.55742e-09	3.13428e-07	-0.253192	chr1	29421487	29421612	uc033fii.1_Mir6342	+	-300390	chr1	30718553	30719961	uc007anc.1_AK087209	-	995554
chr1	30258001	30259000	1.32969e-06	1.98603e-05	0.617128	chr1	29421487	29421612	uc033fii.1_Mir6342	+	-836390	chr1	30718553	30719961	uc007anc.1_AK087209	-	459554
chr1	30410001	30411000	2.97568e-05	0.000239799	-0.42506	chr1	29421487	29421612	uc033fii.1_Mir6342	+	-988390	chr1	30718553	30719961	uc007anc.1_AK087209	-	307554
chr1	30515001	30516000	3.7748e-05	0.000290734	0.518561	chr1	29421487	29421612	uc033fii.1_Mir6342	+	-1093390	chr1	30718553	30719961	uc007anc.1_AK087209	-	202554
chr1	30598001	30599000	0.000470578	0.00229155	0.262408	chr1	29421487	29421612	uc033fii.1_Mir6342	+	-1176390	chr1	30718553	30719961	uc007anc.1_AK087209	-	119554
chr1	30638001	30639000	3.40391e-08	1.11312e-06	0.268485	chr1	29421487	29421612	uc033fii.1_Mir6342	+	-1216390	chr1	30718553	30719961	uc007anc.1_AK087209	-	79554
chr1	30743001	30744000	6.79209e-06	7.32059e-05	-0.324453	chr1	30718553	30719961	uc007anc.1_AK087209	-	-23041	chr1	30770331	30770795	uc007and.1_AK188812	+	26332
chr1	31472001	31473000	0.00136039	0.0054766	0.276528	chr1	31264846	31268061	uc011wiu.1_Gm4850	+	-203941	chr1	32067645	32067693	uc029qnp.1_AB353040	+	594646
chr1	31688001	31689000	1.10796e-05	0.000108443	0.297925	chr1	31264846	31268061	uc011wiu.1_Gm4850	+	-419941	chr1	32067645	32067693	uc029qnp.1_AB353040	+	378646
chr1	31966001	31967000	5.85213e-07	1.03534e-05	-0.435626	chr1	31264846	31268061	uc011wiu.1_Gm4850	+	-697941	chr1	32067645	32067693	uc029qnp.1_AB353040	+	100646
chr1	32172001	32173000	1.73448e-07	3.99215e-06	0.285041	chr1	32067645	32067693	uc029qnp.1_AB353040	+	-104309	chr1	32172805	32657738	uc007anp.1_Khdrbs2	+	0
chr1	32306001	32307000	8.51337e-06	8.77098e-05	-0.459184	chr1	32172805	32657738	uc007anp.1_Khdrbs2	+	0	chr1	32519562	32520999	uc011wiv.1_Gm9839	-	212563
chr1	32752001	32753000	1.73356e-05	0.000155474	0.4284	chr1	32172805	32657738	uc007anp.1_Khdrbs2	+	-94264	chr1	33453807	33669794	uc007anq.2_Prim2	-	700808
chr1	33631001	33632000	4.39718e-07	8.26921e-06	-0.421531	chr1	33453807	33669794	uc007anq.2_Prim2	-	0	chr1	33669823	33670712	uc007ant.3_1700001G17Rik	+	37824
chr1	33749001	33750000	0.000187899	0.00107843	0.329678	chr1	33745483	33757750	uc007any.1_Bag2	-	0	chr1	33761752	33814427	uc007anz.1_Zfp451	-	11753
chr1	33825001	33826000	4.63178e-06	5.37767e-05	-0.268457	chr1	33801959	33814427	uc007aob.1_Zfp451	-	-10575	chr1	33835898	33838914	uc011wiy.1_Gm15455	-	9899
chr1	33831001	33832000	0.016355	0.0420752	-0.303212	chr1	33801959	33814427	uc007aob.1_Zfp451	-	-16575	chr1	33835898	33838914	uc011wiy.1_Gm15455	-	3899
chr1	34103001	34104000	1.52336e-05	0.000140207	0.487917	chr1	34011824	34308662	uc007aoj.2_Dst	+	0	chr1	34117358	34117431	uc033fij.1_Mir6896	+	13359
chr1	34239001	34240000	0.00144268	0.00575278	0.351981	chr1	34011824	34308662	uc007aoj.2_Dst	+	0	chr1	34287186	34308662	uc007aoo.2_Dst	+	47187
chr1	34240001	34241000	0.00329357	0.0113147	0.327803	chr1	34011824	34308662	uc007aoj.2_Dst	+	0	chr1	34287186	34308662	uc007aoo.2_Dst	+	46187
chr1	34742001	34743000	4.20198e-10	3.82765e-08	0.618622	chr1	34721923	34812754	uc007apf.1_Arhgef4	+	0	chr1	34801721	34808911	uc007apg.1_Arhgef4	+	58722
chr1	34777001	34778000	1.5465e-06	2.23545e-05	0.25876	chr1	34721923	34812754	uc007apf.1_Arhgef4	+	0	chr1	34801721	34808911	uc007apg.1_Arhgef4	+	23722
chr1	34778001	34779000	0.000201045	0.00113942	0.318476	chr1	34721923	34812754	uc007apf.1_Arhgef4	+	0	chr1	34801721	34808911	uc007apg.1_Arhgef4	+	22722
chr1	34877001	34878000	0.000338637	0.00174628	-0.318309	chr1	34849958	34879585	uc007apl.1_Plekhb2	+	0	chr1	35522613	35522633	uc033fim.1_Mir7669	-	644614
chr1	34884001	34885000	6.64957e-07	1.14347e-05	0.462911	chr1	34849958	34879585	uc007apl.1_Plekhb2	+	-4417	chr1	35522613	35522633	uc033fim.1_Mir7669	-	637614
chr1	34945001	34946000	2.17537e-05	0.000186359	0.41896	chr1	34849958	34879585	uc007apl.1_Plekhb2	+	-65417	chr1	35522613	35522633	uc033fim.1_Mir7669	-	576614
chr1	35135001	35136000	0.0142662	0.0376604	-0.259865	chr1	34849958	34879585	uc007apl.1_Plekhb2	+	-255417	chr1	35522613	35522633	uc033fim.1_Mir7669	-	386614
chr1	35786001	35787000	4.07722e-06	4.85116e-05	0.695824	chr1	35522613	35522633	uc033fim.1_Mir7669	-	-263369	chr1	35879844	35881119	uc007apm.1_AK003327	+	92845
chr1	36128001	36129000	1.30135e-06	1.9504e-05	-0.481007	chr1	36068399	36106446	uc007apn.2_Hs6st1	+	-21556	chr1	36140027	36165811	uc007apo.2_Uggt1	-	11028
chr1	36246001	36247000	2.69176e-06	3.4837e-05	0.486449	chr1	36179253	36244302	uc007apr.2_Uggt1	-	-1700	chr1	36264601	36273425	uc007aps.1_Neurl3	-	17602
chr1	36255001	36256000	0.000568543	0.00267491	0.258818	chr1	36179253	36244302	uc007apr.2_Uggt1	-	-10700	chr1	36264601	36273425	uc007aps.1_Neurl3	-	8602
chr1	36305001	36306000	7.86847e-05	0.000529667	0.391526	chr1	36268956	36273425	uc007apt.1_Neurl3	-	-31577	chr1	36307732	36324029	uc007apu.2_Arid5a	+	1733
chr1	36450001	36451000	4.67691e-08	1.42182e-06	-0.253712	chr1	36423185	36445239	uc007aqf.1_Lman2l	-	-4763	chr1	36471596	36508776	uc007aqg.2_Cnnm4	+	20597
chr1	36611001	36612000	0.000174824	0.00101624	0.280078	chr1	36599970	36683183	uc007aqv.3_Fam178b	-	0	chr1	36691486	36693388	uc007aqw.1_Cox5b	+	79487
chr1	36737001	36738000	8.10629e-08	2.18845e-06	0.281656	chr1	36714537	36757960	uc007aqy.2_4933424G06Rik	+	0	chr1	36761797	36782820	uc007aqz.2_Zap70	+	23798
chr1	36764001	36765000	0.000500562	0.00241017	0.298825	chr1	36761797	36782820	uc007aqz.2_Zap70	+	0	chr1	36764514	36782820	uc033fir.1_Zap70	+	0
chr1	36768001	36769000	4.2532e-07	8.05817e-06	0.328413	chr1	36766933	36782820	uc033fis.1_Zap70	+	0	chr1	36778983	36782820	uc007ara.2_Zap70	+	9984
chr1	36789001	36790000	3.49703e-07	6.89375e-06	0.304411	chr1	36779653	36782820	uc007arb.2_Zap70	+	-6182	chr1	36792188	36808476	uc007arc.1_Tmem131	-	2189
chr1	36947001	36948000	2.9858e-08	1.00579e-06	0.263748	chr1	36792188	36939527	uc007ard.1_Tmem131	-	-7475	chr1	37029315	37063649	uc007are.1_Vwa3b	+	81316
chr1	37044001	37045000	1.03933e-07	2.66233e-06	0.410398	chr1	37029315	37076995	uc011wjo.1_Vwa3b	+	0	chr1	37157332	37187605	uc011wjp.1_4921511C04Rik	+	112333
chr1	37087001	37088000	6.20914e-06	6.80927e-05	-0.257675	chr1	37029315	37076995	uc011wjo.1_Vwa3b	+	-10007	chr1	37157332	37187605	uc011wjp.1_4921511C04Rik	+	69333
chr1	37117001	37118000	3.09611e-05	0.000247391	-0.314065	chr1	37029315	37076995	uc011wjo.1_Vwa3b	+	-40007	chr1	37157332	37187605	uc011wjp.1_4921511C04Rik	+	39333
chr1	37132001	37133000	0.000525564	0.00250883	0.327078	chr1	37029315	37076995	uc011wjo.1_Vwa3b	+	-55007	chr1	37157332	37187605	uc011wjp.1_4921511C04Rik	+	24333
chr1	37142001	37143000	0.000614783	0.0028522	0.256651	chr1	37029315	37076995	uc011wjo.1_Vwa3b	+	-65007	chr1	37157332	37187605	uc011wjp.1_4921511C04Rik	+	14333
chr1	37218001	37219000	1.26371e-06	1.90784e-05	0.424506	chr1	37175485	37187605	uc007arh.2_4921511C04Rik	+	-30397	chr1	37218277	37263384	uc033fit.1_Cnga3	+	0
chr1	37455001	37456000	2.58492e-06	3.37408e-05	-0.349239	chr1	37439339	37541013	uc007arv.2_Mgat4a	-	0	chr1	37485850	37488605	uc011wjs.1_4930594C11Rik	-	29851
chr1	37623001	37624000	0.000619686	0.00287129	-0.285785	chr1	37611676	37626068	uc007arw.1_2010300C02Rik	-	0	chr1	37637860	37719811	uc007ary.1_2010300C02Rik	-	13861
chr1	37647001	37648000	6.8148e-07	1.16617e-05	0.356268	chr1	37637860	37719811	uc007ary.1_2010300C02Rik	-	0	chr1	37754775	37865079	uc007arz.1_Tsga10	-	106776
chr1	37866001	37867000	7.93045e-08	2.15347e-06	-0.352913	chr1	37865298	37871388	uc007asg.1_AK039030	+	0	chr1	37872205	37876298	uc007ash.2_Lipt1	+	5206
chr1	37912001	37913000	4.27761e-08	1.33355e-06	-0.503026	chr1	37905922	37916493	uc007ask.1_Lyg2	-	0	chr1	37946737	37957759	uc007asl.1_Lyg1	-	33738
chr1	38679001	38680000	0.000186379	0.00107106	0.333997	chr1	38177326	38664955	uc007ass.2_Aff3	-	-14047	chr1	38793343	38796463	uc029qnv.1_BC096025	-	113344
chr1	38830001	38831000	3.09226e-07	6.2668e-06	0.269501	chr1	38794508	38821215	uc007asx.1_Lonrf2	-	-8787	chr1	38863872	38898160	uc007asy.1_Chst10	-	32873
chr1	38865001	38866000	3.13353e-07	6.32929e-06	0.268516	chr1	38863872	38898160	uc011wjt.1_Chst10	-	0	chr1	38870142	38898160	uc007ata.1_Chst10	-	4143
chr1	38973001	38974000	5.04611e-06	5.76244e-05	-0.279984	chr1	38939148	38950276	uc007atb.1_Nms	+	-22726	chr1	38987813	38997236	uc007atc.1_Pdcl3	+	13814
chr1	39080001	39081000	9.81502e-06	9.82916e-05	0.31848	chr1	38987813	38997236	uc007atc.1_Pdcl3	+	-82766	chr1	39186895	39186992	uc033fiv.1_Mir6349	-	105896
chr1	39101001	39102000	2.04578e-07	4.52245e-06	0.400507	chr1	38987813	38997236	uc007atc.1_Pdcl3	+	-103766	chr1	39186895	39186992	uc033fiv.1_Mir6349	-	84896
chr1	39105001	39106000	1.21185e-08	4.98305e-07	-0.449699	chr1	38987813	38997236	uc007atc.1_Pdcl3	+	-107766	chr1	39186895	39186992	uc033fiv.1_Mir6349	-	80896
chr1	39171001	39172000	1.53031e-12	4.24767e-10	0.688402	chr1	38987813	38997236	uc007atc.1_Pdcl3	+	-173766	chr1	39186895	39186992	uc033fiv.1_Mir6349	-	14896
chr1	39215001	39216000	0.000237173	0.00130341	0.4	chr1	39194271	39363240	uc007atd.2_Npas2	+	0	chr1	39367850	39371366	uc007ate.2_Rpl31	+	151851
chr1	39458001	39459000	5.08942e-05	0.000371084	0.539945	chr1	39373315	39478747	uc007ath.2_Tbc1d8	-	0	chr1	39535553	39546877	uc007ati.1_Cnot11	+	76554
chr1	39474001	39475000	0.000153051	0.000911247	-0.283041	chr1	39373315	39478747	uc007ath.2_Tbc1d8	-	0	chr1	39535553	39546877	uc007ati.1_Cnot11	+	60554
chr1	39480001	39481000	2.83726e-07	5.84774e-06	0.619582	chr1	39373315	39478747	uc007ath.2_Tbc1d8	-	-1255	chr1	39535553	39546877	uc007ati.1_Cnot11	+	54554
chr1	39607001	39608000	3.1929e-06	3.99094e-05	-0.351681	chr1	39551295	39577347	uc007atl.3_Rnf149	-	-29655	chr1	39618405	39651182	uc007atm.1_Creg2	-	10406
chr1	39628001	39629000	1.789e-05	0.000159251	0.287	chr1	39618405	39651182	uc007atm.1_Creg2	-	0	chr1	39665300	39720989	uc007atn.2_Rfx8	-	36301
chr1	39643001	39644000	0.000378109	0.00191225	0.346424	chr1	39618405	39651182	uc007atm.1_Creg2	-	0	chr1	39665300	39720989	uc007atn.2_Rfx8	-	21301
chr1	39796001	39797000	4.49184e-12	1.04077e-09	-0.306759	chr1	39665300	39720989	uc007atn.2_Rfx8	-	-75013	chr1	39804140	39805332	uc007ato.2_Gm3646	-	7141
chr1	39839001	39840000	1.65333e-05	0.000149712	-0.315525	chr1	39804140	39805332	uc007ato.2_Gm3646	-	-33670	chr1	39842427	39847330	uc007atp.1_1700066B17Rik	-	2428
chr1	39941001	39942000	2.45455e-10	2.53908e-08	-0.307137	chr1	39900912	40026310	uc011wjx.1_Map4k4	+	0	chr1	40076211	40085851	uc007att.2_Gm16894	-	134212
chr1	40064001	40065000	3.21877e-08	1.06544e-06	-0.562161	chr1	39900912	40026310	uc011wjx.1_Map4k4	+	-37692	chr1	40076211	40085851	uc007att.2_Gm16894	-	11212
chr1	40314001	40315000	0.00119834	0.00493346	-0.379814	chr1	40266585	40316177	uc007atw.1_Il1r1	+	0	chr1	40324626	40365471	uc007atx.1_Il1rl2	+	9627
chr1	40315001	40316000	2.92512e-10	2.90233e-08	-0.29089	chr1	40266585	40316177	uc007atw.1_Il1r1	+	0	chr1	40324626	40365471	uc007atx.1_Il1rl2	+	8627
chr1	40324001	40325000	3.6313e-07	7.09416e-06	0.596188	chr1	40266585	40316177	uc007atw.1_Il1r1	+	-7825	chr1	40324689	40365471	uc007aty.1_Il1rl2	+	0
chr1	40697001	40698000	3.36939e-07	6.69887e-06	0.373832	chr1	40681711	40768885	uc007aun.1_Slc9a2	+	0	chr1	40772039	40790657	uc007auo.1_Mfsd9	-	74040
chr1	40744001	40745000	5.28075e-06	5.98463e-05	0.325941	chr1	40681711	40768885	uc007aun.1_Slc9a2	+	0	chr1	40772039	40790657	uc007auo.1_Mfsd9	-	27040
chr1	40925001	40926000	3.3197e-05	0.00026188	0.313435	chr1	40805600	40855267	uc007auq.1_Tmem182	+	-69735	chr1	41167559	41181252	uc029qny.1_4930448I06Rik	-	241560
chr1	40968001	40969000	5.53997e-06	6.22238e-05	0.320663	chr1	40805600	40855267	uc007auq.1_Tmem182	+	-112735	chr1	41167559	41181252	uc029qny.1_4930448I06Rik	-	198560
chr1	41002001	41003000	1.04233e-07	2.66721e-06	0.373267	chr1	40805600	40855267	uc007auq.1_Tmem182	+	-146735	chr1	41167559	41181252	uc029qny.1_4930448I06Rik	-	164560
chr1	41003001	41004000	1.29403e-10	1.53148e-08	-0.644624	chr1	40805600	40855267	uc007auq.1_Tmem182	+	-147735	chr1	41167559	41181252	uc029qny.1_4930448I06Rik	-	163560
chr1	41159001	41160000	2.90445e-05	0.000235328	0.385127	chr1	40805600	40855267	uc007auq.1_Tmem182	+	-303735	chr1	41167559	41181252	uc029qny.1_4930448I06Rik	-	7560
chr1	41740001	41741000	0.0029703	0.0104028	0.332543	chr1	41167559	41181252	uc029qny.1_4930448I06Rik	-	-558750	chr1	42648199	42667672	uc007aur.1_Pou3f3os	-	907200
chr1	41941001	41942000	5.48609e-05	0.000394623	0.443554	chr1	41167559	41181252	uc029qny.1_4930448I06Rik	-	-759750	chr1	42648199	42667672	uc007aur.1_Pou3f3os	-	706200
chr1	42005001	42006000	0.00221393	0.00818061	0.309504	chr1	41167559	41181252	uc029qny.1_4930448I06Rik	-	-823750	chr1	42648199	42667672	uc007aur.1_Pou3f3os	-	642200
chr1	42237001	42238000	4.31714e-07	8.15383e-06	0.298598	chr1	41167559	41181252	uc029qny.1_4930448I06Rik	-	-1055750	chr1	42648199	42667672	uc007aur.1_Pou3f3os	-	410200
chr1	42257001	42258000	3.81717e-09	2.06913e-07	0.44281	chr1	41167559	41181252	uc029qny.1_4930448I06Rik	-	-1075750	chr1	42648199	42667672	uc007aur.1_Pou3f3os	-	390200
chr1	42354001	42355000	0.000479407	0.00232594	0.25602	chr1	41167559	41181252	uc029qny.1_4930448I06Rik	-	-1172750	chr1	42648199	42667672	uc007aur.1_Pou3f3os	-	293200
chr1	42369001	42370000	0.000136995	0.00083318	0.251388	chr1	41167559	41181252	uc029qny.1_4930448I06Rik	-	-1187750	chr1	42648199	42667672	uc007aur.1_Pou3f3os	-	278200
chr1	42540001	42541000	1.22877e-08	5.03296e-07	-0.294843	chr1	41167559	41181252	uc029qny.1_4930448I06Rik	-	-1358750	chr1	42648199	42667672	uc007aur.1_Pou3f3os	-	107200
chr1	42616001	42617000	0.00230756	0.00846095	0.319859	chr1	41167559	41181252	uc029qny.1_4930448I06Rik	-	-1434750	chr1	42648199	42667672	uc007aur.1_Pou3f3os	-	31200
chr1	42651001	42652000	8.65069e-08	2.29944e-06	0.341814	chr1	42648199	42694825	uc007auu.1_Pou3f3os	-	0	chr1	42693031	42694825	uc007auv.1_Pou3f3os	-	41032
chr1	43006001	43007000	4.11579e-06	4.88805e-05	-0.368912	chr1	42952871	43035449	uc007avd.2_Gpr45	+	0	chr1	43032198	43033320	uc033fiy.1_Gpr45	+	25199
chr1	43338001	43339000	2.45234e-06	3.23842e-05	-0.297516	chr1	43123070	43196761	uc007avl.2_Fhl2	-	-141241	chr1	43445750	43462222	uc007avn.1_Nck2	+	106751
chr1	43655001	43656000	0.000831713	0.00365517	0.391682	chr1	43445750	43570518	uc007avo.2_Nck2	+	-84484	chr1	43730601	43742564	uc007avp.2_1500015O10Rik	+	74602
chr1	44198001	44199000	1.32657e-07	3.22805e-06	-0.34085	chr1	44147743	44181260	uc007awi.2_Ercc5	+	-16742	chr1	44204069	44218931	uc007awk.1_Mettl21e	-	5070
chr1	45171001	45172000	1.12101e-08	4.6885e-07	-0.379113	chr1	44551670	44796836	uc007awn.2_Gulp1	+	-374166	chr1	45311537	45325018	uc007awp.2_Col3a1	+	139538
chr1	45459001	45460000	1.09733e-06	1.70211e-05	0.588322	chr1	45414198	45503282	uc007aws.1_Col5a2	-	0	chr1	45611670	45611696	uc011wkd.2_AB345950	+	151671
chr1	46041001	46042000	1.90997e-06	2.64617e-05	0.315742	chr1	46020414	46030437	uc011wkm.1_Gm4776	-	-10565	chr1	46066737	46373550	uc007awx.2_Dnah7b	+	24738
chr1	46192001	46193000	7.15525e-06	7.62454e-05	-0.407694	chr1	46066737	46373550	uc007awx.2_Dnah7b	+	0	chr1	46235247	46271175	uc007awy.2_Dnah7b	+	42248
chr1	46799001	46800000	0.000427513	0.00211624	-0.385256	chr1	46791827	46807463	uc007axb.1_BC048766	+	0	chr1	46807543	46853509	uc007axc.1_Slc39a10	-	7544
chr1	46887001	46888000	7.70201e-05	0.000520546	-0.479694	chr1	46807543	46853509	uc007axc.1_Slc39a10	-	-33493	chr1	47467020	47467125	uc033fiz.1_Mir6350	-	579021
chr1	47097001	47098000	6.19012e-09	2.99646e-07	-0.384109	chr1	46807543	46853509	uc007axc.1_Slc39a10	-	-243493	chr1	47467020	47467125	uc033fiz.1_Mir6350	-	369021
chr1	47218001	47219000	1.04745e-08	4.45154e-07	-0.544917	chr1	46807543	46853509	uc007axc.1_Slc39a10	-	-364493	chr1	47467020	47467125	uc033fiz.1_Mir6350	-	248021
chr1	47489001	47490000	5.20927e-06	5.91636e-05	0.347268	chr1	47467020	47467125	uc033fiz.1_Mir6350	-	-21877	chr1	47658850	47658908	uc007axe.1_AK219219	+	168851
chr1	47829001	47830000	0.000273961	0.00146715	-0.31386	chr1	47658850	47658908	uc007axe.1_AK219219	+	-170094	chr1	49244615	49340431	uc007axf.1_C230029F24Rik	+	1414616
chr1	47896001	47897000	0.00011536	0.00072488	0.397501	chr1	47658850	47658908	uc007axe.1_AK219219	+	-237094	chr1	49244615	49340431	uc007axf.1_C230029F24Rik	+	1347616
chr1	47903001	47904000	0.00178766	0.00686472	-0.316266	chr1	47658850	47658908	uc007axe.1_AK219219	+	-244094	chr1	49244615	49340431	uc007axf.1_C230029F24Rik	+	1340616
chr1	48540001	48541000	0.000544475	0.00258229	0.337782	chr1	47658850	47658908	uc007axe.1_AK219219	+	-881094	chr1	49244615	49340431	uc007axf.1_C230029F24Rik	+	703616
chr1	48859001	48860000	0.0107094	0.0297578	-0.332078	chr1	47658850	47658908	uc007axe.1_AK219219	+	-1200094	chr1	49244615	49340431	uc007axf.1_C230029F24Rik	+	384616
chr1	48860001	48861000	1.52846e-06	2.21577e-05	-0.437	chr1	47658850	47658908	uc007axe.1_AK219219	+	-1201094	chr1	49244615	49340431	uc007axf.1_C230029F24Rik	+	383616
chr1	49081001	49082000	6.27198e-05	0.000440993	-0.253835	chr1	47658850	47658908	uc007axe.1_AK219219	+	-1422094	chr1	49244615	49340431	uc007axf.1_C230029F24Rik	+	162616
chr1	50926001	50927000	2.43884e-05	0.000204192	0.333077	chr1	50909961	50979920	uc007axi.1_Tmeff2	+	0	chr1	50927522	51187270	uc007axj.1_Tmeff2	+	523
chr1	51463001	51464000	0.000175939	0.00102145	0.275096	chr1	51457933	51458931	uc007axl.1_AK006937	-	-4071	chr1	51466006	51478399	uc007axm.1_Nabp1	-	2007
chr1	51633001	51634000	2.18001e-07	4.74326e-06	0.397085	chr1	51507085	51596718	uc007axq.1_AK043869	-	-36284	chr1	51749765	51915974	uc007axr.2_Myo1b	-	115766
chr1	52008001	52009000	3.93564e-05	0.000300657	0.33986	chr1	51987147	52107184	uc011wkn.1_Stat4	+	0	chr1	52008243	52107184	uc007axx.1_Stat4	+	0
chr1	52033001	52034000	5.87815e-06	6.51772e-05	0.319566	chr1	52008243	52107184	uc007axx.1_Stat4	+	0	chr1	52119437	52137852	uc007axy.1_Stat1	+	85438
chr1	52034001	52035000	0.000159559	0.000943135	-0.29374	chr1	52008243	52107184	uc007axx.1_Stat4	+	0	chr1	52119437	52137852	uc007axy.1_Stat1	+	84438
chr1	52137001	52138000	0.000498505	0.00240218	0.407166	chr1	52119621	52161865	uc007ayc.2_Stat1	+	0	chr1	52144077	52161865	uc007ayd.2_Stat1	+	6078
chr1	52287001	52288000	2.95143e-06	3.7462e-05	-0.263445	chr1	52185280	52233232	uc011wko.1_Gls	-	-53770	chr1	52455848	52500448	uc007ayh.2_Nab1	-	167849
chr1	52392001	52393000	1.04234e-06	1.63264e-05	0.374619	chr1	52185280	52233232	uc011wko.1_Gls	-	-158770	chr1	52455848	52500448	uc007ayh.2_Nab1	-	62849
chr1	52396001	52397000	1.29218e-19	9.04204e-17	-0.334824	chr1	52185280	52233232	uc011wko.1_Gls	-	-162770	chr1	52455848	52500448	uc007ayh.2_Nab1	-	58849
chr1	52415001	52416000	2.62117e-07	5.49114e-06	-0.252585	chr1	52185280	52233232	uc011wko.1_Gls	-	-181770	chr1	52455848	52500448	uc007ayh.2_Nab1	-	39849
chr1	52478001	52479000	1.19642e-05	0.00011538	0.361154	chr1	52455848	52500448	uc007ayh.2_Nab1	-	0	chr1	52522537	52522564	uc029qoi.1_DQ715306	+	43538
chr1	52612001	52613000	0.00181101	0.00693864	0.271484	chr1	52522537	52522564	uc029qoi.1_DQ715306	+	-89438	chr1	52630704	52651919	uc007ayk.3_Tmem194b	+	17705
chr1	53012001	53013000	2.89881e-06	3.69323e-05	-0.327666	chr1	52925126	52963260	uc007ays.1_1700019D03Rik	-	-48742	chr1	53061662	53068079	uc007ayt.1_Mstn	+	48663
chr1	53013001	53014000	4.57108e-06	5.32077e-05	0.461822	chr1	52925126	52963260	uc007ays.1_1700019D03Rik	-	-49742	chr1	53061662	53068079	uc007ayt.1_Mstn	+	47663
chr1	53706001	53707000	1.22885e-06	1.86534e-05	0.328192	chr1	53698029	53706784	uc007azi.1_Dnah7a	-	0	chr1	53755511	53785215	uc007azj.2_Stk17b	-	48512
chr1	54231001	54232000	0.00277776	0.00984534	0.44011	chr1	53941495	54195034	uc007azm.1_Hecw2	-	-35968	chr1	54250682	54278961	uc007azn.1_Ccdc150	+	18683
chr1	54232001	54233000	0.000277464	0.00148222	-0.38328	chr1	53941495	54195034	uc007azm.1_Hecw2	-	-36968	chr1	54250682	54278961	uc007azn.1_Ccdc150	+	17683
chr1	54327001	54328000	4.88963e-29	5.65636e-26	-0.261499	chr1	54250682	54368727	uc011wkx.1_Ccdc150	+	0	chr1	54397580	54438971	uc007azp.1_Gtf3c3	-	69581
chr1	54508001	54509000	0.000327765	0.00170037	-0.25142	chr1	54472999	54557684	uc011wky.2_Pgap1	-	0	chr1	54524283	54557684	uc007azr.3_Pgap1	-	15284
chr1	54676001	54677000	2.40694e-09	1.44827e-07	-0.34349	chr1	54645339	54926387	uc011wkz.1_Ankrd44	-	0	chr1	54681728	54736816	uc007azt.1_AK015376	+	4729
chr1	54841001	54842000	8.2547e-05	0.000550812	-0.29567	chr1	54760886	54926387	uc007azv.2_Ankrd44	-	0	chr1	54985169	54991115	uc007azw.2_Sf3b1	-	143170
chr1	55185001	55186000	0.00449663	0.0146202	0.269291	chr1	55170159	55226782	uc007bag.1_Rftn2	-	0	chr1	55206335	55226782	uc007bah.1_Rftn2	-	20336
chr1	55325001	55326000	3.01651e-07	6.14465e-06	0.284452	chr1	55300068	55363469	uc007bal.1_Boll	-	0	chr1	55346256	55363469	uc007bam.1_Boll	-	20257
chr1	55380001	55381000	0.00113049	0.0046992	0.272595	chr1	55346256	55363469	uc007bam.1_Boll	-	-16533	chr1	55405945	55754285	uc007ban.2_Plcl1	+	24946
chr1	55708001	55709000	0.000135308	0.00082477	-0.42832	chr1	55405945	55754285	uc007ban.2_Plcl1	+	0	chr1	55931240	55972098	uc007bao.2_9130227L01Rik	+	222241
chr1	55902001	55903000	1.27128e-05	0.000121215	0.346486	chr1	55405945	55754285	uc007ban.2_Plcl1	+	-147717	chr1	55931240	55972098	uc007bao.2_9130227L01Rik	+	28241
chr1	55979001	55980000	4.19089e-05	0.000316484	-0.347446	chr1	55960913	55972098	uc007bap.2_9130227L01Rik	+	-6904	chr1	56018977	56020203	uc007baq.1_AK005643	+	38978
chr1	56977001	56978000	8.95046e-12	1.81527e-09	0.449464	chr1	56971468	57042513	uc007bat.2_9130024F11Rik	+	0	chr1	57200644	57214996	uc007bav.2_BC055402	-	222645
chr1	57267001	57268000	0.00125614	0.00513027	-0.251121	chr1	57200644	57214996	uc007bav.2_BC055402	-	-52006	chr1	57352969	57353005	uc029qop.1_DQ699876	-	84970
chr1	57421001	57422000	2.19098e-10	2.32737e-08	-0.572378	chr1	57406547	57415958	uc007bbc.2_9430016H08Rik	+	-5044	chr1	57774860	57948397	uc007bbd.2_Spats2l	+	352861
chr1	57439001	57440000	7.8841e-09	3.5966e-07	-0.332899	chr1	57406547	57415958	uc007bbc.2_9430016H08Rik	+	-23044	chr1	57774860	57948397	uc007bbd.2_Spats2l	+	334861
chr1	57473001	57474000	2.685e-08	9.24702e-07	-0.252459	chr1	57406547	57415958	uc007bbc.2_9430016H08Rik	+	-57044	chr1	57774860	57948397	uc007bbd.2_Spats2l	+	300861
chr1	57505001	57506000	5.35927e-09	2.68875e-07	-0.344784	chr1	57406547	57415958	uc007bbc.2_9430016H08Rik	+	-89044	chr1	57774860	57948397	uc007bbd.2_Spats2l	+	268861
chr1	57700001	57701000	0.00013336	0.000814982	-0.388739	chr1	57406547	57415958	uc007bbc.2_9430016H08Rik	+	-284044	chr1	57774860	57948397	uc007bbd.2_Spats2l	+	73861
chr1	57939001	57940000	0.000210679	0.00118268	0.276714	chr1	57845570	57948397	uc007bbe.2_Spats2l	+	0	chr1	57955100	57969524	uc011wlh.1_Kctd18	-	15101
chr1	58087001	58088000	7.86407e-05	0.000529478	-0.311598	chr1	58029968	58106410	uc007bbl.1_Aox1	+	0	chr1	58113135	58200452	uc007bbm.1_Aox3	+	25136
chr1	58238001	58239000	3.66443e-06	4.45577e-05	0.347353	chr1	58210396	58268596	uc007bbo.1_Aox4	+	0	chr1	58278325	58379264	uc007bbp.1_Aox2	+	39326
chr1	58256001	58257000	0.000947911	0.00406828	-0.298255	chr1	58210396	58268596	uc007bbo.1_Aox4	+	0	chr1	58278325	58379264	uc007bbp.1_Aox2	+	21326
chr1	58300001	58301000	2.58314e-06	3.37264e-05	0.458915	chr1	58278325	58379264	uc007bbp.1_Aox2	+	0	chr1	58393096	58406548	uc007bbq.1_Bzw1	+	92097
chr1	58448001	58449000	9.89095e-07	1.56677e-05	-0.278924	chr1	58447633	58462276	uc007bcb.1_Nif3l1	+	0	chr1	58462770	58501426	uc007bcc.1_Orc2	-	13771
chr1	58499001	58500000	1.52009e-68	6.47259e-65	-0.401321	chr1	58462770	58505109	uc007bce.2_Orc2	-	0	chr1	58505147	58517530	uc007bcf.1_AK144771	+	5148
chr1	58659001	58660000	1.36533e-05	0.000128345	-0.317432	chr1	58658362	58692445	uc011wlm.2_Als2cr12	-	0	chr1	58711507	58759203	uc007bcn.2_Cflar	+	51508
chr1	58720001	58721000	0.00032804	0.00170157	-0.276679	chr1	58713295	58723070	uc007bcr.1_Cflar	+	0	chr1	58795373	58847503	uc007bcs.1_Casp8	+	74374
chr1	59240001	59241000	2.13338e-05	0.000183508	-0.515102	chr1	59191622	59237231	uc007bdn.2_Als2	-	-2771	chr1	59256906	59352369	uc007bdq.2_Cdk15	+	15907
chr1	59610001	59611000	4.61031e-16	2.62117e-13	-0.734949	chr1	59516263	59634509	uc007bdv.1_Gm973	+	0	chr1	59639433	59670834	uc007bdx.1_Sumo1	-	28434
chr1	59982001	59983000	3.17474e-07	6.40027e-06	-0.374978	chr1	59913005	59985348	uc011wlt.2_Fam117b	+	0	chr1	59989067	60043087	uc007beb.1_Ica1l	-	6068
chr1	59994001	59995000	0.0119966	0.0326655	-0.299058	chr1	59989067	60043184	uc007bec.1_Ica1l	-	0	chr1	60020790	60043184	uc007bed.1_Ica1l	-	25791
chr1	60081001	60082000	8.32213e-08	2.23017e-06	-0.3641	chr1	60076867	60098500	uc007beg.2_Wdr12	-	0	chr1	60098246	60153953	uc007beh.2_Carf	+	16247
chr1	61103001	61104000	1.82783e-07	4.15128e-06	0.418677	chr1	60977913	61000321	uc011wlz.2_Icos	+	-102681	chr1	61378431	61395904	uc029qot.1_9530026F06Rik	+	274432
chr1	61180001	61181000	0.00160168	0.00627381	-0.337154	chr1	60977913	61000321	uc011wlz.2_Icos	+	-179681	chr1	61378431	61395904	uc029qot.1_9530026F06Rik	+	197432
chr1	61419001	61420000	1.94564e-06	2.68554e-05	-0.392593	chr1	61378431	61395904	uc029qot.1_9530026F06Rik	+	-23098	chr1	61638823	61769859	uc007bfc.2_Pard3b	+	218824
chr1	61635001	61636000	0.00234176	0.00856329	0.271472	chr1	61378431	61395904	uc029qot.1_9530026F06Rik	+	-239098	chr1	61638823	61769859	uc007bfc.2_Pard3b	+	2824
chr1	62293001	62294000	1.10573e-05	0.000108273	0.393207	chr1	62010306	62642284	uc011wma.1_Pard3b	+	0	chr1	62703316	62739932	uc007bfi.1_Nrp2	+	409317
chr1	62380001	62381000	1.99926e-06	2.74667e-05	0.258453	chr1	62010306	62642284	uc011wma.1_Pard3b	+	0	chr1	62703316	62739932	uc007bfi.1_Nrp2	+	322317
chr1	62567001	62568000	2.9155e-05	0.000235966	0.282051	chr1	62010306	62642284	uc011wma.1_Pard3b	+	0	chr1	62703316	62739932	uc007bfi.1_Nrp2	+	135317
chr1	62840001	62841000	1.52234e-06	2.20914e-05	0.402947	chr1	62703316	62818692	uc007bfo.1_Nrp2	+	-21310	chr1	63047800	63114267	uc011wmb.1_Ino80d	-	206801
chr1	62917001	62918000	2.05925e-06	2.8146e-05	-0.27659	chr1	62703316	62818692	uc007bfo.1_Nrp2	+	-98310	chr1	63047800	63114267	uc011wmb.1_Ino80d	-	129801
chr1	62986001	62987000	5.13881e-10	4.45601e-08	0.317162	chr1	62703316	62818692	uc007bfo.1_Nrp2	+	-167310	chr1	63047800	63114267	uc011wmb.1_Ino80d	-	60801
chr1	62995001	62996000	3.25847e-05	0.000258017	0.483604	chr1	62703316	62818692	uc007bfo.1_Nrp2	+	-176310	chr1	63047800	63114267	uc011wmb.1_Ino80d	-	51801
chr1	63266001	63267000	1.2937e-05	0.000122943	-0.251343	chr1	63200357	63314575	uc033fjf.1_Zdbf2	+	0	chr1	63273268	63314575	uc007bgb.2_Zdbf2	+	6269
chr1	63446001	63447000	5.48127e-09	2.74017e-07	0.424981	chr1	63445903	63596515	uc007bgg.1_Adam23	+	0	chr1	63567848	63596515	uc007bgh.1_Adam23	+	120849
chr1	63614001	63615000	9.00828e-05	0.000591046	0.255993	chr1	63567848	63596515	uc011wmf.1_Adam23	+	-17487	chr1	63622850	63686927	uc007bgi.1_Dytn	-	7851
chr1	63677001	63678000	5.6027e-06	6.27712e-05	0.314037	chr1	63622850	63686927	uc007bgi.1_Dytn	-	0	chr1	63698826	63730318	uc007bgj.1_Mdh1b	-	20827
chr1	63806001	63807000	1.92704e-05	0.000168969	-0.272737	chr1	63754908	63769267	uc029qow.1_4933402D24Rik	-	-36735	chr1	63964726	63968999	uc007bgm.1_Gm13749	+	157727
chr1	64531001	64532000	7.98387e-06	8.32099e-05	0.45594	chr1	64041925	64121426	uc007bgq.1_Klf7	-	-409576	chr1	64532803	64604548	uc007bgr.1_Creb1	+	804
chr1	64615001	64616000	2.05876e-07	4.54311e-06	0.444192	chr1	64606479	64617206	uc007bgv.1_Mettl21a	-	0	chr1	64679868	64690659	uc007bgw.2_2810408I11Rik	-	63869
chr1	64649001	64650000	2.48647e-05	0.000207598	0.374227	chr1	64606479	64617206	uc007bgv.1_Mettl21a	-	-31796	chr1	64679868	64690659	uc007bgw.2_2810408I11Rik	-	29869
chr1	65177001	65178000	4.80801e-05	0.000354186	0.407616	chr1	65158615	65186479	uc011wmj.1_Idh1	-	0	chr1	65186682	65205706	uc007bho.1_Pikfyve	+	8683
chr1	65318001	65319000	1.06203e-05	0.000104855	-0.279391	chr1	65311256	65389244	uc007bhu.1_Pth2r	+	0	chr1	65926521	65928304	uc007bhv.1_Crygf	+	607522
chr1	65904001	65905000	0.00254531	0.00915882	-0.314299	chr1	65311256	65389244	uc007bhu.1_Pth2r	+	-514758	chr1	65926521	65928304	uc007bhv.1_Crygf	+	21522
chr1	66672001	66673000	8.66284e-07	1.41075e-05	0.274949	chr1	66468446	66699148	uc007bih.2_Unc80	+	0	chr1	66679563	66699148	uc007bii.2_Unc80	+	6564
chr1	67265001	67266000	1.13951e-05	0.000110967	-0.299796	chr1	67250613	67324376	uc007bja.1_BC108272	+	0	chr1	68039965	69108059	uc007bjb.1_Erbb4	-	773966
chr1	67617001	67618000	0.000266721	0.00143587	-0.371664	chr1	67250613	67324376	uc007bja.1_BC108272	+	-292626	chr1	68039965	69108059	uc007bjb.1_Erbb4	-	421966
chr1	68928001	68929000	0.00182115	0.00696895	0.344846	chr1	68039965	69108059	uc007bjb.1_Erbb4	-	0	chr1	69531209	69685960	uc007bjd.2_Ikzf2	-	602210
chr1	68995001	68996000	1.72592e-06	2.4412e-05	0.395889	chr1	68039965	69108059	uc007bjb.1_Erbb4	-	0	chr1	69531209	69685960	uc007bjd.2_Ikzf2	-	535210
chr1	69111001	69112000	0.000228943	0.00126653	-0.542521	chr1	68039965	69108059	uc007bjb.1_Erbb4	-	-2943	chr1	69531209	69685960	uc007bjd.2_Ikzf2	-	419210
chr1	69788001	69789000	3.36874e-05	0.000265091	-0.303128	chr1	69681570	69687140	uc029qoy.1_Ikzf2	-	-100862	chr1	69826969	69926250	uc033fjj.1_Spag16	+	37970
chr1	69826001	69827000	6.5981e-08	1.8627e-06	0.326162	chr1	69681570	69687140	uc029qoy.1_Ikzf2	-	-138862	chr1	69826969	70725132	uc007bjh.2_Spag16	+	0
chr1	69827001	69828000	1.48464e-09	1.00525e-07	0.275254	chr1	69826969	70725132	uc007bjh.2_Spag16	+	0	chr1	69951614	70725132	uc007bji.2_Spag16	+	123615
chr1	69951001	69952000	0.000163475	0.000961949	0.280944	chr1	69826969	70725132	uc007bjh.2_Spag16	+	0	chr1	69951614	70725132	uc007bji.2_Spag16	+	0
chr1	70279001	70280000	0.00120672	0.00496246	-0.339736	chr1	69951614	70725132	uc007bji.2_Spag16	+	0	chr1	70725714	70732202	uc007bjj.1_Vwc2l	+	445715
chr1	70643001	70644000	0.000921501	0.00397359	0.295967	chr1	69951614	70725132	uc007bji.2_Spag16	+	0	chr1	70725714	70732202	uc007bjj.1_Vwc2l	+	81715
chr1	70726001	70727000	1.56496e-09	1.04571e-07	0.48114	chr1	70725922	70885397	uc011wmo.1_Vwc2l	+	0	chr1	70728698	70885397	uc011wmp.1_Vwc2l	+	1699
chr1	70839001	70840000	4.13695e-08	1.29972e-06	0.304569	chr1	70728698	70885397	uc011wmp.1_Vwc2l	+	0	chr1	71027534	71102972	uc007bjm.2_Bard1	-	187535
chr1	70954001	70955000	1.66515e-07	3.86145e-06	-0.438905	chr1	70728698	70885397	uc011wmp.1_Vwc2l	+	-68605	chr1	71027534	71102972	uc007bjm.2_Bard1	-	72535
chr1	71434001	71435000	0.00208136	0.00776935	0.26733	chr1	71361742	71414910	uc007bjq.1_Abca12	-	-19092	chr1	71557155	71563198	uc007bjr.2_Atic	+	122156
chr1	71815001	71816000	1.63172e-05	0.000148069	-0.255508	chr1	71653156	71662843	uc007bkf.1_Apol7d	+	-152159	chr1	71888111	71891204	uc011wmr.1_Gm8883	+	72112
chr1	72233001	72234000	2.01888e-07	4.47387e-06	0.378631	chr1	72159232	72212307	uc007bkg.2_Mreg	-	-20695	chr1	72243992	72274869	uc007bkh.1_AK084284	+	9993
chr1	72566001	72567000	3.49794e-09	1.93647e-07	-0.43825	chr1	72427111	72536564	uc007bkn.1_March4	-	-29438	chr1	72583250	72591886	uc007bko.2_Smarcal1	+	16251
chr1	72878001	72879000	2.06876e-06	2.82412e-05	-0.273316	chr1	72858064	72874865	uc007bkx.1_Igfbp5	-	-3137	chr1	72951531	72960904	uc007bky.1_AK048274	+	72532
chr1	73000001	73001000	0.000174592	0.00101507	-0.317556	chr1	72951531	72960904	uc007bky.1_AK048274	+	-39098	chr1	73015074	73015899	uc007bkz.2_Tnp1	-	14075
chr1	73038001	73039000	6.35601e-06	6.93877e-05	-0.327475	chr1	73024585	73025508	uc007bla.2_1700027A15Rik	+	-12494	chr1	73391384	73407569	uc007blb.1_Pinc	-	352385
chr1	73046001	73047000	9.6115e-06	9.67474e-05	-0.270508	chr1	73024585	73025508	uc007bla.2_1700027A15Rik	+	-20494	chr1	73391384	73407569	uc007blb.1_Pinc	-	344385
chr1	73116001	73117000	1.79135e-05	0.000159386	-0.43583	chr1	73024585	73025508	uc007bla.2_1700027A15Rik	+	-90494	chr1	73391384	73407569	uc007blb.1_Pinc	-	274385
chr1	73117001	73118000	2.00301e-17	1.23722e-14	-0.370003	chr1	73024585	73025508	uc007bla.2_1700027A15Rik	+	-91494	chr1	73391384	73407569	uc007blb.1_Pinc	-	273385
chr1	73244001	73245000	1.97067e-12	5.23754e-10	-0.786671	chr1	73024585	73025508	uc007bla.2_1700027A15Rik	+	-218494	chr1	73391384	73407569	uc007blb.1_Pinc	-	146385
chr1	73291001	73292000	3.644e-05	0.000282432	-0.262837	chr1	73024585	73025508	uc007bla.2_1700027A15Rik	+	-265494	chr1	73391384	73407569	uc007blb.1_Pinc	-	99385
chr1	73392001	73393000	1.24682e-05	0.000119308	-0.315409	chr1	73391384	73407569	uc007blb.1_Pinc	-	0	chr1	73395333	73407569	uc007blc.1_Pinc	-	2334
chr1	73453001	73454000	9.15753e-06	9.30246e-05	-0.394113	chr1	73398967	73430779	uc029qpc.1_D530049I02Rik	+	-22223	chr1	73618380	73864466	uc007bld.2_6030407O03Rik	-	164381
chr1	73479001	73480000	1.19959e-05	0.000115627	-0.388458	chr1	73398967	73430779	uc029qpc.1_D530049I02Rik	+	-48223	chr1	73618380	73864466	uc007bld.2_6030407O03Rik	-	138381
chr1	73520001	73521000	2.09884e-08	7.61902e-07	-0.556972	chr1	73398967	73430779	uc029qpc.1_D530049I02Rik	+	-89223	chr1	73618380	73864466	uc007bld.2_6030407O03Rik	-	97381
chr1	73806001	73807000	0.00197881	0.00745933	-0.293262	chr1	73618380	73864466	uc007bld.2_6030407O03Rik	-	0	chr1	73910230	73937333	uc007blf.2_Tns1	-	103231
chr1	73854001	73855000	5.02545e-12	1.14084e-09	-0.351064	chr1	73618380	73864466	uc007bld.2_6030407O03Rik	-	0	chr1	73910230	73937333	uc007blf.2_Tns1	-	55231
chr1	73864001	73865000	4.83197e-09	2.47381e-07	0.404758	chr1	73618380	73864466	uc007bld.2_6030407O03Rik	-	0	chr1	73910230	73937333	uc007blf.2_Tns1	-	45231
chr1	74103001	74104000	0.000708712	0.0032065	0.30251	chr1	73910230	74124449	uc011wmx.2_Tns1	-	0	chr1	74125540	74148230	uc007blk.2_Rufy4	+	21541
chr1	74332001	74333000	1.86182e-13	6.74877e-11	0.453458	chr1	74285033	74353692	uc007blu.1_Pnkd	+	0	chr1	74332609	74353692	uc007blw.1_Pnkd	+	0
chr1	74333001	74334000	0.000340714	0.00175489	0.343229	chr1	74332609	74353692	uc007blw.1_Pnkd	+	0	chr1	74362107	74369321	uc007blx.1_Catip	+	28108
chr1	74371001	74372000	5.72483e-07	1.01795e-05	-0.304151	chr1	74362441	74369321	uc011wna.1_Catip	+	-1681	chr1	74375202	74386051	uc007bly.2_Slc11a1	+	3203
chr1	74481001	74482000	1.79409e-09	1.16321e-07	0.319381	chr1	74452686	74505803	uc007bme.1_Usp37	-	0	chr1	74506059	74530842	uc007bmf.2_Rqcd1	+	24060
chr1	74610001	74611000	2.86826e-06	3.66223e-05	0.353746	chr1	74601638	74636893	uc011wnc.1_Stk36	+	0	chr1	74622829	74636893	uc007bmw.1_Stk36	+	11830
chr1	74718001	74719000	3.90193e-06	4.68353e-05	0.426883	chr1	74713573	74737890	uc007bna.1_Cyp27a1	+	0	chr1	74738921	74748955	uc007bnb.2_Prkag3	-	19922
chr1	74816001	74817000	1.34664e-07	3.26944e-06	0.34284	chr1	74792018	74804175	uc007bnf.2_Wnt10a	+	-11827	chr1	74816746	74816817	uc033fjm.1_TRNA-Gly	-	0
chr1	74825001	74826000	7.27645e-06	7.71917e-05	-0.374506	chr1	74816746	74816817	uc033fjm.1_TRNA-Gly	-	-8185	chr1	74855028	74857732	uc007bng.2_Cdk5r2	+	29029
chr1	74854001	74855000	0.000118315	0.000740175	-0.582483	chr1	74816746	74816817	uc033fjm.1_TRNA-Gly	-	-37185	chr1	74855028	74857732	uc007bng.2_Cdk5r2	+	29
chr1	75139001	75140000	8.90314e-05	0.000585496	0.262227	chr1	75135214	75142697	uc007bns.1_Cnppd1	-	0	chr1	75142785	75147909	uc007bnt.1_Fam134a	+	2786
chr1	75169001	75170000	5.25636e-08	1.55982e-06	0.425477	chr1	75168734	75171626	uc007bnw.2_Zfand2b	+	0	chr1	75171640	75180283	uc007bnx.1_Abcb6	-	1641
chr1	75218001	75219000	2.51251e-11	4.19369e-09	0.36503	chr1	75214973	75219253	uc007bok.1_Tuba4a	-	0	chr1	75220094	75223654	uc007bol.1_A630095N17Rik	-	1095
chr1	75237001	75238000	0.000265385	0.00142994	0.251802	chr1	75236701	75245692	uc011wnm.1_Dnajb2	+	0	chr1	75247040	75264208	uc007boq.1_Ptprn	-	9041
chr1	75283001	75284000	0.00050729	0.00243671	0.385067	chr1	75272201	75278380	uc011wno.1_Resp18	-	-4622	chr1	75307939	75317017	uc007bow.2_Dnpep	-	23940
chr1	75312001	75313000	0.000266314	0.00143391	0.281572	chr1	75308564	75317637	uc011wnp.1_Dnpep	-	0	chr1	75360291	75368579	uc007box.2_Des	+	47292
chr1	75352001	75353000	3.92512e-05	0.000299991	-0.271297	chr1	75308564	75317637	uc011wnp.1_Dnpep	-	-34365	chr1	75360291	75368579	uc007box.2_Des	+	7292
chr1	75383001	75384000	2.55086e-06	3.33987e-05	-0.295051	chr1	75382113	75404565	uc007bpa.1_Speg	+	0	chr1	75384964	75389104	uc007bpb.1_Speg	+	965
chr1	75450001	75451000	1.81676e-06	2.54234e-05	0.268948	chr1	75436146	75443176	uc007bpf.1_Gmppa	+	-6826	chr1	75450509	75474340	uc007bpg.1_Asic4	+	0
chr1	75480001	75481000	0.000155458	0.000923055	0.309161	chr1	75479579	75485693	uc007bpm.2_Tmem198	+	0	chr1	75485824	75506452	uc007bpn.2_Obsl1	-	4825
chr1	75504001	75505000	9.68731e-06	9.73196e-05	0.319069	chr1	75501671	75506452	uc007bpr.2_Obsl1	-	0	chr1	75507076	75510354	uc007bps.1_Inha	+	2077
chr1	75517001	75518000	8.76823e-09	3.88921e-07	0.531792	chr1	75507076	75510354	uc007bps.1_Inha	+	-6648	chr1	75521528	75537335	uc007bpt.2_Stk11ip	+	3529
chr1	75564001	75565000	1.69569e-09	1.1141e-07	0.59331	chr1	75547943	75559431	uc007bpx.2_Slc4a3	+	-4571	chr1	76489132	76502028	uc007bpy.1_Gm17751	+	924133
chr1	75850001	75851000	0.00208115	0.00776887	-0.31941	chr1	75547943	75559431	uc007bpx.2_Slc4a3	+	-290571	chr1	76489132	76502028	uc007bpy.1_Gm17751	+	638133
chr1	76191001	76192000	0.00341651	0.0116597	0.359967	chr1	75547943	75559431	uc007bpx.2_Slc4a3	+	-631571	chr1	76489132	76502028	uc007bpy.1_Gm17751	+	297133
chr1	76306001	76307000	0.000217735	0.00121544	-0.320558	chr1	75547943	75559431	uc007bpx.2_Slc4a3	+	-746571	chr1	76489132	76502028	uc007bpy.1_Gm17751	+	182133
chr1	77256001	77257000	1.11062e-08	4.65675e-07	0.362506	chr1	76509559	76509643	uc033fjq.1_Mir6343	+	-746359	chr1	77367184	77515088	uc007bpz.1_Epha4	-	110185
chr1	77962001	77963000	4.10532e-06	4.87793e-05	0.487171	chr1	77396796	77515088	uc007bqa.1_Epha4	-	-446914	chr1	78101266	78197136	uc007bqb.2_Pax3	-	138267
chr1	78103001	78104000	0.000193783	0.0011056	0.345018	chr1	78101266	78197136	uc007bqc.2_Pax3	-	0	chr1	78183457	78197136	uc007bqd.1_Pax3	-	79458
chr1	78181001	78182000	2.63953e-09	1.5564e-07	0.730023	chr1	78101266	78197136	uc007bqc.2_Pax3	-	0	chr1	78183457	78197136	uc007bqd.1_Pax3	-	1458
chr1	78187001	78188000	0.0134397	0.0358699	0.289593	chr1	78183457	78197136	uc007bqd.1_Pax3	-	0	chr1	78297794	78297866	uc033fjs.1_TRNA-Pro	+	109795
chr1	78193001	78194000	0.00124473	0.00509252	0.293881	chr1	78183457	78197136	uc007bqd.1_Pax3	-	0	chr1	78297794	78297866	uc033fjs.1_TRNA-Pro	+	103795
chr1	78204001	78205000	1.76929e-07	4.04945e-06	0.28131	chr1	78183457	78197136	uc007bqd.1_Pax3	-	-6866	chr1	78297794	78297866	uc033fjs.1_TRNA-Pro	+	92795
chr1	78315001	78316000	1.98687e-08	7.29592e-07	-0.439978	chr1	78310345	78420286	uc007bqe.1_Sgpp2	+	0	chr1	78417957	78488897	uc007bqf.2_Farsb	-	101958
chr1	78316001	78317000	8.0615e-05	0.000540317	0.294041	chr1	78310345	78420286	uc007bqe.1_Sgpp2	+	0	chr1	78417957	78488897	uc007bqf.2_Farsb	-	100958
chr1	78361001	78362000	4.9207e-10	4.32296e-08	-0.339876	chr1	78310345	78420286	uc007bqe.1_Sgpp2	+	0	chr1	78417957	78488897	uc007bqf.2_Farsb	-	55958
chr1	78364001	78365000	1.10932e-06	1.71791e-05	0.326612	chr1	78310345	78420286	uc007bqe.1_Sgpp2	+	0	chr1	78417957	78488897	uc007bqf.2_Farsb	-	52958
chr1	78419001	78420000	0.00297554	0.0104174	-0.357046	chr1	78417957	78488897	uc007bqf.2_Farsb	-	0	chr1	78424744	78488897	uc007bqg.2_Farsb	-	4745
chr1	78523001	78524000	1.68403e-10	1.89871e-08	-0.504179	chr1	78511168	78606964	uc007bqk.1_Mogat1	+	0	chr1	78537671	78538173	uc007bqm.2_Mogat1	+	13672
chr1	78631001	78632000	0.000266153	0.00143327	0.293857	chr1	78511168	78606964	uc007bqk.1_Mogat1	+	-24038	chr1	78657824	78667601	uc007bqn.2_Utp14b	+	25825
chr1	78763001	78764000	4.68244e-09	2.41642e-07	-0.283476	chr1	78657824	78707743	uc011wnu.1_Acsl3	+	-55259	chr1	78816948	78820025	uc007bqq.1_Kcne4	+	52949
chr1	78907001	78908000	0.000249622	0.00135962	-0.305322	chr1	78816948	78820025	uc007bqq.1_Kcne4	+	-86977	chr1	79434668	79440090	uc007bqr.1_Scg2	-	526669
chr1	79084001	79085000	0.0184975	0.046494	0.29922	chr1	78816948	78820025	uc007bqq.1_Kcne4	+	-263977	chr1	79434668	79440090	uc007bqr.1_Scg2	-	349669
chr1	79213001	79214000	0.0117808	0.0321882	0.278701	chr1	78816948	78820025	uc007bqq.1_Kcne4	+	-392977	chr1	79434668	79440090	uc007bqr.1_Scg2	-	220669
chr1	79407001	79408000	1.24634e-07	3.07593e-06	-0.348961	chr1	78816948	78820025	uc007bqq.1_Kcne4	+	-586977	chr1	79434668	79440090	uc007bqr.1_Scg2	-	26669
chr1	79439001	79440000	0.0145833	0.0383518	0.253126	chr1	79434668	79440090	uc007bqs.1_Scg2	-	0	chr1	79507935	79507956	uc029qpj.1_AB349811	+	67936
chr1	79531001	79532000	1.86436e-06	2.5979e-05	-0.362792	chr1	79507935	79507956	uc029qpj.1_AB349811	+	-23046	chr1	79606875	79671972	uc011wnw.1_Ap1s3	-	74876
chr1	79613001	79614000	1.42217e-06	2.0923e-05	-0.299382	chr1	79606875	79671972	uc011wnw.1_Ap1s3	-	0	chr1	79702261	79761769	uc007bqu.2_Wdfy1	-	88262
chr1	79760001	79761000	4.19917e-07	7.97241e-06	0.338893	chr1	79726402	79761769	uc007bqw.2_Wdfy1	-	0	chr1	79776017	79778546	uc007bqx.1_Mrpl44	+	15018
chr1	79762001	79763000	0.000152936	0.000910671	-0.341442	chr1	79726402	79761769	uc007bqw.2_Wdfy1	-	-233	chr1	79776017	79778546	uc007bqx.1_Mrpl44	+	13018
chr1	79818001	79819000	3.3255e-07	6.63733e-06	-0.41948	chr1	79815107	79858665	uc007bra.2_Serpine2	-	0	chr1	80198698	80213944	uc007brb.2_Fam124b	-	379699
chr1	79908001	79909000	1.06386e-05	0.000105	-0.520394	chr1	79815107	79858665	uc007bra.2_Serpine2	-	-49337	chr1	80198698	80213944	uc007brb.2_Fam124b	-	289699
chr1	79926001	79927000	3.75728e-11	5.79701e-09	-0.295924	chr1	79815107	79858665	uc007bra.2_Serpine2	-	-67337	chr1	80198698	80213944	uc007brb.2_Fam124b	-	271699
chr1	79927001	79928000	1.13487e-06	1.74828e-05	-0.534244	chr1	79815107	79858665	uc007bra.2_Serpine2	-	-68337	chr1	80198698	80213944	uc007brb.2_Fam124b	-	270699
chr1	79977001	79978000	0.000121612	0.000756757	-0.305091	chr1	79815107	79858665	uc007bra.2_Serpine2	-	-118337	chr1	80198698	80213944	uc007brb.2_Fam124b	-	220699
chr1	79995001	79996000	3.36907e-11	5.31066e-09	-0.432986	chr1	79815107	79858665	uc007bra.2_Serpine2	-	-136337	chr1	80198698	80213944	uc007brb.2_Fam124b	-	202699
chr1	80039001	80040000	3.29069e-10	3.17225e-08	-0.866293	chr1	79815107	79858665	uc007bra.2_Serpine2	-	-180337	chr1	80198698	80213944	uc007brb.2_Fam124b	-	158699
chr1	80053001	80054000	0.000488581	0.0023627	-0.377318	chr1	79815107	79858665	uc007bra.2_Serpine2	-	-194337	chr1	80198698	80213944	uc007brb.2_Fam124b	-	144699
chr1	80091001	80092000	1.40366e-05	0.000131187	-0.403526	chr1	79815107	79858665	uc007bra.2_Serpine2	-	-232337	chr1	80198698	80213944	uc007brb.2_Fam124b	-	106699
chr1	80135001	80136000	3.83936e-07	7.4238e-06	-0.547359	chr1	79815107	79858665	uc007bra.2_Serpine2	-	-276337	chr1	80198698	80213944	uc007brb.2_Fam124b	-	62699
chr1	80159001	80160000	4.76911e-08	1.44436e-06	-0.27157	chr1	79815107	79858665	uc007bra.2_Serpine2	-	-300337	chr1	80198698	80213944	uc007brb.2_Fam124b	-	38699
chr1	80173001	80174000	0.000539236	0.00256218	-0.454372	chr1	79815107	79858665	uc007bra.2_Serpine2	-	-314337	chr1	80198698	80213944	uc007brb.2_Fam124b	-	24699
chr1	80238001	80239000	0.00011929	0.000745085	-0.284615	chr1	80198698	80213944	uc007brb.2_Fam124b	-	-24058	chr1	80266817	80340430	uc007brc.1_Cul3	-	27818
chr1	80377001	80378000	8.72916e-06	8.95045e-05	-0.388842	chr1	80266817	80340430	uc007brd.1_Cul3	-	-36572	chr1	80445931	80475660	uc029qpk.1_1700016L21Rik	+	67932
chr1	80520001	80521000	0.0118586	0.0323664	-0.286233	chr1	80501067	80758553	uc007brg.3_Dock10	-	0	chr1	80523715	80592856	uc007brf.1_Dock10	-	2716
chr1	80538001	80539000	6.50709e-06	7.07245e-05	-0.380882	chr1	80523715	80592856	uc007brf.1_Dock10	-	0	chr1	80592516	80665352	uc007brh.3_Dock10	-	53517
chr1	80597001	80598000	2.62279e-06	3.41194e-05	-0.388144	chr1	80592516	80665352	uc007brh.3_Dock10	-	0	chr1	80645705	80758553	uc007bri.2_Dock10	-	47706
chr1	80663001	80664000	4.06474e-08	1.28105e-06	-0.653543	chr1	80645705	80758553	uc007bri.2_Dock10	-	0	chr1	81076949	81300096	uc007brj.1_Nyap2	+	412950
chr1	80741001	80742000	1.51001e-07	3.57628e-06	-0.453345	chr1	80645705	80758553	uc007bri.2_Dock10	-	0	chr1	81076949	81300096	uc007brj.1_Nyap2	+	334950
chr1	81024001	81025000	8.10204e-05	0.00054238	-0.323907	chr1	80645705	80758553	uc007bri.2_Dock10	-	-265449	chr1	81076949	81300096	uc007brj.1_Nyap2	+	51950
chr1	81156001	81157000	2.76804e-07	5.73639e-06	-0.344155	chr1	81077406	81341764	uc007brn.1_Nyap2	+	0	chr1	82131915	82132019	uc033fjw.1_Mir6344	+	974916
chr1	82538001	82539000	2.03762e-09	1.27592e-07	-0.411855	chr1	82450722	82586849	uc033fjz.1_Col4a4	-	0	chr1	82585126	82585146	uc029qpl.1_FW313009	-	46127
chr1	82797001	82798000	7.19609e-06	7.65869e-05	0.25409	chr1	82756648	82768456	uc007bsd.1_Tm4sf20	-	-28546	chr1	82839482	82896275	uc007bse.1_Agfg1	+	41483
chr1	82935001	82936000	0.000779983	0.00347035	-0.268134	chr1	82880007	82896275	uc007bsh.1_Agfg1	+	-38727	chr1	83012522	83038448	uc007bsi.2_Slc19a3	-	76523
chr1	83038001	83039000	0.000165256	0.00097049	0.281265	chr1	83012522	83038448	uc007bsj.2_Slc19a3	-	0	chr1	83116765	83119166	uc007bsm.2_Ccl20	+	77766
chr1	83621001	83622000	1.14172e-06	1.75761e-05	0.531516	chr1	83265126	83408200	uc007bsr.2_Sphkap	-	-212802	chr1	83843601	83911571	uc007bss.1_AK017086	-	221602
chr1	83708001	83709000	0.000597022	0.00278393	-0.275778	chr1	83265126	83408200	uc007bsr.2_Sphkap	-	-299802	chr1	83843601	83911571	uc007bss.1_AK017086	-	134602
chr1	83710001	83711000	0.000402969	0.00201508	-0.283819	chr1	83265126	83408200	uc007bsr.2_Sphkap	-	-301802	chr1	83843601	83911571	uc007bss.1_AK017086	-	132602
chr1	83910001	83911000	3.07023e-07	6.23056e-06	0.306606	chr1	83843601	83911571	uc007bss.1_AK017086	-	0	chr1	84036292	84284645	uc007bst.2_Pid1	-	125293
chr1	84284001	84285000	1.319e-09	9.18241e-08	0.357727	chr1	84157128	84284645	uc007bsv.2_Pid1	-	0	chr1	84369838	84696221	uc007bsw.1_Dner	-	84839
chr1	84302001	84303000	1.35389e-05	0.000127512	0.269204	chr1	84115331	84341110	uc007bsu.1_Pid1	-	0	chr1	84369838	84696221	uc007bsw.1_Dner	-	66839
chr1	84483001	84484000	4.21275e-07	7.99213e-06	-0.393082	chr1	84369838	84696221	uc007bsw.1_Dner	-	0	chr1	84533943	84696221	uc007bsx.1_Dner	-	49944
chr1	84653001	84654000	7.03655e-10	5.65093e-08	0.251392	chr1	84533943	84696221	uc007bsx.1_Dner	-	0	chr1	84695838	84695915	uc029qpm.1_Mir5126	+	41839
chr1	84694001	84695000	0.00150181	0.00594755	0.326637	chr1	84533943	84696221	uc007bsx.1_Dner	-	0	chr1	84695838	84695915	uc029qpm.1_Mir5126	+	839
chr1	84929001	84930000	0.00305478	0.010646	-0.34006	chr1	84906704	84935083	uc007btd.1_Slc16a14	-	0	chr1	84965292	84966164	uc007bte.1_BC038927	+	35293
chr1	85547001	85548000	2.05759e-07	4.54103e-06	0.369819	chr1	85539029	85552185	uc007bty.1_Csprs	+	0	chr1	85551310	85552182	uc029qqx.1_BC038927	+	3311
chr1	85617001	85618000	9.78244e-07	1.55392e-05	-0.311744	chr1	85600702	85645036	uc007buc.1_Sp140	+	0	chr1	85650049	85683118	uc007bud.1_Sp100	+	32050
chr1	85629001	85630000	7.90634e-06	8.25781e-05	-0.42076	chr1	85600702	85645036	uc007buc.1_Sp140	+	0	chr1	85650049	85683118	uc007bud.1_Sp100	+	20050
chr1	85767001	85768000	1.90672e-07	4.28557e-06	0.528534	chr1	85751947	85752074	uc033fkb.1_Mir8096	+	-14928	chr1	85775270	85784694	uc033fkc.1_9930111H07Rik	+	7271
chr1	85789001	85790000	6.83544e-07	1.1688e-05	-0.279405	chr1	85775270	85784694	uc033fkc.1_9930111H07Rik	+	-4308	chr1	85793446	85851577	uc007bum.2_Cab39	+	3447
chr1	85861001	85862000	4.95974e-05	0.000363184	0.436503	chr1	85793446	85851577	uc007bum.2_Cab39	+	-9425	chr1	85894509	85908698	uc011wof.1_Itm2c	+	32510
chr1	85870001	85871000	7.63215e-06	8.02084e-05	0.250628	chr1	85793446	85851577	uc007bum.2_Cab39	+	-18425	chr1	85894509	85908698	uc011wof.1_Itm2c	+	23510
chr1	85884001	85885000	3.58546e-06	4.37718e-05	0.524982	chr1	85793446	85851577	uc007bum.2_Cab39	+	-32425	chr1	85894509	85908698	uc011wof.1_Itm2c	+	9510
chr1	85929001	85930000	6.55515e-06	7.11464e-05	0.38329	chr1	85928482	85931756	uc007bup.2_4933407L21Rik	+	0	chr1	85939536	85961055	uc007buq.1_Gpr55	-	9537
chr1	85935001	85936000	2.1507e-06	2.91077e-05	-0.405309	chr1	85928482	85931756	uc007bup.2_4933407L21Rik	+	-3246	chr1	85939536	85961055	uc007buq.1_Gpr55	-	3537
chr1	86342001	86343000	8.76642e-07	1.42396e-05	0.286646	chr1	86303220	86307305	uc007bvk.2_B3gnt7	+	-34697	chr1	86344718	86359455	uc007bvl.1_Ncl	-	1719
chr1	86531001	86532000	2.46717e-07	5.23372e-06	0.447539	chr1	86526735	86530698	uc007bvp.1_Ptma	+	-304	chr1	86543014	86582501	uc007bvq.1_Pde6d	-	11015
chr1	86537001	86538000	0.00312083	0.0108321	0.275019	chr1	86526735	86530698	uc007bvp.1_Ptma	+	-6304	chr1	86543014	86582501	uc007bvq.1_Pde6d	-	5015
chr1	87175001	87176000	0.000345487	0.00177532	-0.435186	chr1	87147654	87156356	uc007bwc.2_Ecel1	-	-18646	chr1	87183492	87188404	uc007bwe.2_Prss56	+	7493
chr1	87286001	87287000	1.10267e-08	4.63118e-07	0.493358	chr1	87264363	87310791	uc007bwo.1_Efhd1	+	0	chr1	87326997	87355722	uc007bwp.2_Gigyf2	+	39998
chr1	87344001	87345000	1.24258e-05	0.000118989	-0.264662	chr1	87326997	87450810	uc007bwt.2_Gigyf2	+	0	chr1	87386283	87394729	uc007bwu.2_Kcnj13	-	41284
chr1	87394001	87395000	1.05769e-08	4.48461e-07	-0.359585	chr1	87386283	87394729	uc007bwu.2_Kcnj13	-	0	chr1	87404993	87419179	uc007bwv.1_Gigyf2	+	9994
chr1	87473001	87474000	0.000168335	0.000985562	0.3459	chr1	87470263	87475459	uc011woo.1_3110079O15Rik	+	0	chr1	87476828	87510362	uc007bwx.2_Ngef	-	2829
chr1	87521001	87522000	8.59153e-09	3.83882e-07	0.447636	chr1	87476828	87573870	uc007bwy.2_Ngef	-	0	chr1	87574026	87597840	uc011wop.1_Neu2	+	52027
chr1	87541001	87542000	5.3107e-05	0.00038447	0.437138	chr1	87476828	87573870	uc007bwy.2_Ngef	-	0	chr1	87574026	87597840	uc011wop.1_Neu2	+	32027
chr1	87658001	87659000	0.000336731	0.00173827	0.335789	chr1	87620311	87720508	uc007bxf.2_Inpp5d	+	0	chr1	87676238	87720508	uc007bxg.2_Inpp5d	+	17239
chr1	87715001	87716000	1.68496e-08	6.40668e-07	-0.481994	chr1	87676238	87720508	uc007bxh.2_Inpp5d	+	0	chr1	87756010	87767983	uc007bxi.2_Atg16l1	+	40011
chr1	87733001	87734000	2.3746e-07	5.07771e-06	0.294209	chr1	87676238	87720508	uc007bxh.2_Inpp5d	+	-12494	chr1	87756010	87767983	uc007bxi.2_Atg16l1	+	22011
chr1	88367001	88368000	1.17728e-07	2.94399e-06	0.382733	chr1	88306661	88388851	uc029qrl.1_Trpm8	+	0	chr1	88407018	88426438	uc007byq.1_Spp2	+	39019
chr1	88561001	88562000	0.00421902	0.013868	-0.297293	chr1	88551516	88562166	uc007bys.2_Gm19589	+	0	chr1	88673124	88701876	uc011woz.1_Arl4c	-	111125
chr1	88689001	88690000	5.36484e-07	9.67256e-06	0.322298	chr1	88673124	88701876	uc011woz.1_Arl4c	-	0	chr1	88698225	88702191	uc007byt.1_Arl4c	-	8226
chr1	88819001	88820000	3.72168e-05	0.000287362	0.350072	chr1	88754889	88755733	uc007byu.1_2410088K16Rik	+	-63269	chr1	89016112	89022210	uc029qrm.1_1700067G17Rik	+	196113
chr1	88962001	88963000	8.73607e-09	3.88173e-07	0.268474	chr1	88754889	88755733	uc007byu.1_2410088K16Rik	+	-206269	chr1	89016112	89022210	uc029qrm.1_1700067G17Rik	+	53113
chr1	89107001	89108000	0.000210069	0.00118009	-0.43144	chr1	89070461	89153793	uc007byv.1_Sh3bp4	+	0	chr1	89360343	89406133	uc029qrn.1_C030007H22Rik	-	252344
chr1	89210001	89211000	0.00529424	0.016696	0.336481	chr1	89070461	89153793	uc007byv.1_Sh3bp4	+	-56209	chr1	89360343	89406133	uc029qrn.1_C030007H22Rik	-	149344
chr1	89230001	89231000	1.7076e-24	1.54721e-21	0.272802	chr1	89070461	89153793	uc007byv.1_Sh3bp4	+	-76209	chr1	89360343	89406133	uc029qrn.1_C030007H22Rik	-	129344
chr1	89279001	89280000	1.93891e-07	4.33747e-06	0.255217	chr1	89070461	89153793	uc007byv.1_Sh3bp4	+	-125209	chr1	89360343	89406133	uc029qrn.1_C030007H22Rik	-	80344
chr1	89581001	89582000	1.2579e-12	3.6066e-10	0.354699	chr1	89454810	89895282	uc007byx.1_Agap1	+	0	chr1	89627752	89895282	uc007byy.1_Agap1	+	45753
chr1	89784001	89785000	8.16626e-07	1.34721e-05	-0.294976	chr1	89766305	89834588	uc011wpa.1_Agap1	+	0	chr1	89927955	89929185	uc029qro.1_AK138361	-	142956
chr1	89913001	89914000	0.000116438	0.000730578	0.336007	chr1	89627752	89895282	uc007byy.1_Agap1	+	-17720	chr1	89927955	89929185	uc029qro.1_AK138361	-	13956
chr1	90261001	90262000	3.56677e-10	3.37499e-08	-0.410472	chr1	90203979	90215722	uc033fkj.1_Ackr3	+	-45280	chr1	90603424	90613341	uc007bzi.1_Cops8	+	341425
chr1	90335001	90336000	6.5764e-09	3.1396e-07	-0.365728	chr1	90203979	90215722	uc033fkj.1_Ackr3	+	-119280	chr1	90603424	90613341	uc007bzi.1_Cops8	+	267425
chr1	90461001	90462000	1.19443e-11	2.28829e-09	-0.527608	chr1	90203979	90215722	uc033fkj.1_Ackr3	+	-245280	chr1	90603424	90613341	uc007bzi.1_Cops8	+	141425
chr1	90972001	90973000	6.31756e-06	6.90396e-05	-0.284362	chr1	90958132	90969620	uc007bzo.2_Rab17	-	-2382	chr1	90998726	91108672	uc007bzp.2_Lrrfip1	+	25727
chr1	91088001	91089000	6.19012e-05	0.000436295	0.403487	chr1	91053443	91128944	uc011wpe.1_Lrrfip1	+	0	chr1	91111212	91117322	uc007bzu.2_Lrrfip1	+	22213
chr1	91110001	91111000	2.71804e-08	9.33031e-07	0.555556	chr1	91053443	91128944	uc011wpe.1_Lrrfip1	+	0	chr1	91111212	91117322	uc007bzu.2_Lrrfip1	+	213
chr1	91222001	91223000	8.18725e-07	1.34915e-05	0.680975	chr1	91179821	91225196	uc007bzx.2_Ramp1	+	0	chr1	91250318	91286025	uc007bzy.1_Ube2f	+	27319
chr1	91272001	91273000	0.00101664	0.00430808	0.283273	chr1	91250565	91286025	uc007cac.1_Ube2f	+	0	chr1	91298337	91305454	uc007cad.1_Scly	+	25338
chr1	91282001	91283000	9.15217e-06	9.29748e-05	-0.263231	chr1	91250565	91286025	uc007cac.1_Ube2f	+	0	chr1	91298337	91305454	uc007cad.1_Scly	+	15338
chr1	91366001	91367000	8.83654e-06	9.03417e-05	0.33945	chr1	91362204	91362414	uc029qrq.1_AK199574	+	-3588	chr1	91366429	91374217	uc007caj.1_Fam132b	+	0
chr1	91484001	91485000	2.21963e-06	2.98829e-05	-0.37006	chr1	91433227	91459328	uc007caw.1_Per2	-	-24674	chr1	91494667	91529307	uc007cax.2_Traf3ip1	+	9668
chr1	91499001	91500000	7.13706e-10	5.71102e-08	-0.303168	chr1	91494667	91529307	uc007cax.2_Traf3ip1	+	0	chr1	91518261	91529307	uc007cay.2_Traf3ip1	+	18262
chr1	91674001	91675000	7.05949e-05	0.000485082	0.442634	chr1	91541079	91559590	uc007cbc.1_Asb1	+	-114412	chr1	91798527	91802937	uc011wpi.1_AK028549	-	123528
chr1	91804001	91805000	1.18055e-08	4.88346e-07	0.503597	chr1	91801476	91848027	uc007cbd.1_Twist2	+	0	chr1	91929801	91930561	uc029qrt.1_Hdac4	-	124802
chr1	91805001	91806000	1.54479e-07	3.6414e-06	0.387554	chr1	91801476	91848027	uc007cbd.1_Twist2	+	0	chr1	91929801	91930561	uc029qrt.1_Hdac4	-	123802
chr1	91888001	91889000	2.88161e-05	0.000233771	-0.375687	chr1	91801476	91848027	uc007cbd.1_Twist2	+	-39975	chr1	91929801	91930561	uc029qrt.1_Hdac4	-	40802
chr1	91893001	91894000	9.94188e-13	2.9652e-10	0.491693	chr1	91801476	91848027	uc007cbd.1_Twist2	+	-44975	chr1	91929801	91930561	uc029qrt.1_Hdac4	-	35802
chr1	92058001	92059000	1.27104e-12	3.62869e-10	-0.729891	chr1	91932748	92180341	uc007cbg.2_Hdac4	-	0	chr1	92439718	92473758	uc007cbh.1_Ndufa10	-	380719
chr1	92203001	92204000	1.186e-12	3.44486e-10	-0.35111	chr1	91932748	92180341	uc007cbg.2_Hdac4	-	-22661	chr1	92439718	92473758	uc007cbh.1_Ndufa10	-	235719
chr1	92314001	92315000	5.44624e-08	1.60404e-06	-0.446507	chr1	91932748	92180341	uc007cbg.2_Hdac4	-	-133661	chr1	92439718	92473758	uc007cbh.1_Ndufa10	-	124719
chr1	92338001	92339000	0.000220473	0.00122768	-0.411846	chr1	91932748	92180341	uc007cbg.2_Hdac4	-	-157661	chr1	92439718	92473758	uc007cbh.1_Ndufa10	-	100719
chr1	92348001	92349000	7.55687e-07	1.26587e-05	-0.26009	chr1	91932748	92180341	uc007cbg.2_Hdac4	-	-167661	chr1	92439718	92473758	uc007cbh.1_Ndufa10	-	90719
chr1	92490001	92491000	0.00048828	0.00236137	0.422061	chr1	92479680	92480619	uc007cbi.1_Olfr1416	-	-9383	chr1	92490817	92491753	uc007cbj.1_Olfr1415	-	0
chr1	92651001	92652000	9.71088e-07	1.54448e-05	-0.48597	chr1	92644217	92648841	uc007cbr.1_Otos	-	-2161	chr1	92831685	92860196	uc007cbs.1_Gpc1	+	179686
chr1	92666001	92667000	0.00172774	0.00667494	0.266757	chr1	92644217	92648841	uc007cbr.1_Otos	-	-17161	chr1	92831685	92860196	uc007cbs.1_Gpc1	+	164686
chr1	92755001	92756000	2.99534e-06	3.78956e-05	-0.35254	chr1	92644217	92648841	uc007cbr.1_Otos	-	-106161	chr1	92831685	92860196	uc007cbs.1_Gpc1	+	75686
chr1	92846001	92847000	0.00480425	0.0154348	0.303407	chr1	92831685	92860196	uc007cbs.1_Gpc1	+	0	chr1	92850377	92850443	uc011wpk.1_Mir149	+	3378
chr1	92881001	92882000	0.000152193	0.000907141	0.400908	chr1	92870128	92902906	uc011wpl.1_Ankmy1	-	0	chr1	92906988	92908620	uc007cbu.1_Dusp28	+	24989
chr1	92885001	92886000	0.000126055	0.000778853	0.338258	chr1	92870128	92902906	uc011wpl.1_Ankmy1	-	0	chr1	92906988	92908620	uc007cbu.1_Dusp28	+	20989
chr1	92970001	92971000	1.88427e-08	6.9946e-07	0.457086	chr1	92933542	92950590	uc011wpn.1_9430060I03Rik	-	-19412	chr1	92973118	92986391	uc007cbz.2_Gpr35	+	2119
chr1	93034001	93035000	9.32723e-05	0.000608185	0.464734	chr1	93015455	93101865	uc007cdh.2_Kif1a	-	0	chr1	93135239	93145421	uc007cdi.2_Agxt	+	100240
chr1	93053001	93054000	0.000566957	0.00266899	0.336187	chr1	93015455	93101865	uc007cdh.2_Kif1a	-	0	chr1	93135239	93145421	uc007cdi.2_Agxt	+	81240
chr1	93103001	93104000	2.02338e-08	7.40285e-07	0.482754	chr1	93015455	93101865	uc007cdh.2_Kif1a	-	-1137	chr1	93135239	93145421	uc007cdi.2_Agxt	+	31240
chr1	93170001	93171000	0.00632948	0.0193225	0.258859	chr1	93151354	93160948	uc007cdk.2_2310007B03Rik	-	-9054	chr1	93215898	93231072	uc007cdl.1_AK086911	+	44899
chr1	93182001	93183000	1.61622e-07	3.77422e-06	0.30565	chr1	93151354	93160948	uc007cdk.2_2310007B03Rik	-	-21054	chr1	93215898	93231072	uc007cdl.1_AK086911	+	32899
chr1	93261001	93262000	6.25818e-05	0.000440239	-0.309136	chr1	93235896	93296448	uc007cdm.1_Sned1	+	0	chr1	93274548	93274610	uc033fkr.1_Mir6901	+	12549
chr1	93373001	93374000	6.47605e-09	3.10912e-07	-0.337046	chr1	93343644	93367618	uc007cdv.1_Ppp1r7	+	-5384	chr1	93373895	93404304	uc033fku.1_Ano7	+	0
chr1	93392001	93393000	3.24953e-08	1.07314e-06	0.347212	chr1	93373895	93404304	uc033fku.1_Ano7	+	0	chr1	93405939	93445652	uc007cdx.1_Hdlbp	-	12940
chr1	93557001	93558000	5.96046e-06	6.58963e-05	0.268482	chr1	93512103	93621976	uc007cec.2_Farp2	+	0	chr1	93620750	93635727	uc007ced.1_Stk25	-	62751
chr1	94080001	94081000	0.000179692	0.00103954	-0.291917	chr1	94038304	94052553	uc007cev.1_Pdcd1	-	-27449	chr1	94171233	94171254	uc029qsd.1_AB349811	+	90234
chr1	94586001	94587000	0.000132069	0.000808746	0.28411	chr1	94171233	94171254	uc029qsd.1_AB349811	+	-414748	chr1	94771941	94771985	uc029qse.1_AB353040	+	184942
chr1	94696001	94697000	0.000270003	0.0014501	0.357388	chr1	94171233	94171254	uc029qsd.1_AB349811	+	-524748	chr1	94771941	94771985	uc029qse.1_AB353040	+	74942
chr1	94802001	94803000	1.17281e-05	0.000113519	0.332974	chr1	94797441	94802472	uc007cew.1_4930440C22Rik	+	0	chr1	95313627	95327945	uc007cex.2_Fam174a	+	510628
chr1	96008001	96009000	1.17116e-05	0.000113409	0.252249	chr1	95990658	96021758	uc029qsg.1_1700063A18Rik	-	0	chr1	96345095	96345116	uc029qsh.1_JA187517	-	336096
chr1	96872001	96873000	2.81922e-09	1.64109e-07	0.310664	chr1	96818783	96872171	uc007cfc.1_Slco4c1	-	0	chr1	96872220	96881230	uc007cfd.1_AK035520	+	0
chr1	97682001	97683000	9.66687e-06	9.7147e-05	0.417275	chr1	97643901	97662018	uc011wpw.1_D1Ertd622e	-	-19984	chr1	97706042	97723834	uc007cfi.3_Ppip5k2	-	23043
chr1	98235001	98236000	3.10607e-10	3.03225e-08	0.405616	chr1	98131466	98144655	uc007cft.1_1810006J02Rik	+	-90347	chr1	98421123	98509380	uc007cfu.2_Slco6d1	+	185124
chr1	98589001	98590000	1.2537e-06	1.89647e-05	0.258668	chr1	98421123	98516988	uc007cfw.2_Slco6d1	+	-72014	chr1	98589552	98765813	uc007cfx.1_AK144617	+	0
chr1	98664001	98665000	0.00055622	0.00262716	-0.505668	chr1	98589552	98765813	uc007cfx.1_AK144617	+	0	chr1	99130748	99130796	uc029qsj.1_AB353040	+	465749
chr1	99894001	99895000	2.13086e-05	0.000183331	0.358207	chr1	99772764	100485942	uc007cfy.1_Cntnap5b	+	0	chr1	100097760	100485942	uc007cfz.1_Cntnap5b	+	202761
chr1	100055001	100056000	9.27593e-05	0.00060553	-0.289952	chr1	99772764	100485942	uc007cfy.1_Cntnap5b	+	0	chr1	100097760	100485942	uc007cfz.1_Cntnap5b	+	41761
chr1	100147001	100148000	3.51898e-06	4.31048e-05	-0.54902	chr1	100097760	100485942	uc007cfz.1_Cntnap5b	+	0	chr1	101155767	101175202	uc007cgb.2_Gm20268	+	1007768
chr1	101210001	101211000	0.000264051	0.00142429	0.433707	chr1	101155767	101175202	uc007cgb.2_Gm20268	+	-34800	chr1	103213249	103213285	uc029qsk.1_AB335791	-	2002250
chr1	101630001	101631000	0.00204441	0.00765484	-0.328449	chr1	101155767	101175202	uc007cgb.2_Gm20268	+	-454800	chr1	103213249	103213285	uc029qsk.1_AB335791	-	1582250
chr1	101940001	101941000	5.50403e-05	0.000395586	0.371675	chr1	101155767	101175202	uc007cgb.2_Gm20268	+	-764800	chr1	103213249	103213285	uc029qsk.1_AB335791	-	1272250
chr1	101987001	101988000	7.36995e-07	1.24069e-05	-0.286908	chr1	101155767	101175202	uc007cgb.2_Gm20268	+	-811800	chr1	103213249	103213285	uc029qsk.1_AB335791	-	1225250
chr1	102001001	102002000	6.87348e-07	1.1735e-05	0.47437	chr1	101155767	101175202	uc007cgb.2_Gm20268	+	-825800	chr1	103213249	103213285	uc029qsk.1_AB335791	-	1211250
chr1	102809001	102810000	2.15832e-11	3.72684e-09	0.510912	chr1	101155767	101175202	uc007cgb.2_Gm20268	+	-1633800	chr1	103213249	103213285	uc029qsk.1_AB335791	-	403250
chr1	103006001	103007000	2.96595e-09	1.70175e-07	0.368118	chr1	101155767	101175202	uc007cgb.2_Gm20268	+	-1830800	chr1	103213249	103213285	uc029qsk.1_AB335791	-	206250
chr1	104193001	104194000	0.000999838	0.00424923	0.317148	chr1	103213249	103213285	uc029qsk.1_AB335791	-	-979717	chr1	104656857	104656896	uc029qsl.1_AB335737	-	462858
chr1	104226001	104227000	0.000144675	0.000870756	0.271516	chr1	103213249	103213285	uc029qsk.1_AB335791	-	-1012717	chr1	104656857	104656896	uc029qsl.1_AB335737	-	429858
chr1	104769001	104770000	6.49238e-06	7.05954e-05	0.298039	chr1	104768818	104995481	uc007cgc.1_Cdh20	+	0	chr1	105276916	105356710	uc011wpy.1_Rnf152	-	506917
chr1	104881001	104882000	0.000553038	0.00261491	-0.303329	chr1	104768818	104995481	uc007cgc.1_Cdh20	+	0	chr1	105276916	105356710	uc011wpy.1_Rnf152	-	394917
chr1	105021001	105022000	2.78273e-05	0.000227178	-0.332039	chr1	104768818	104995481	uc007cgc.1_Cdh20	+	-25521	chr1	105276916	105356710	uc011wpy.1_Rnf152	-	254917
chr1	105048001	105049000	0.0132089	0.035367	0.289809	chr1	104768818	104995481	uc007cgc.1_Cdh20	+	-52521	chr1	105276916	105356710	uc011wpy.1_Rnf152	-	227917
chr1	105141001	105142000	0.00467548	0.0150963	0.317309	chr1	104768818	104995481	uc007cgc.1_Cdh20	+	-145521	chr1	105276916	105356710	uc011wpy.1_Rnf152	-	134917
chr1	105429001	105430000	0.000595346	0.00277755	-0.442862	chr1	105356006	105361630	uc007cge.1_AK039635	+	-67372	chr1	105518421	105569165	uc011wqa.2_Pign	-	88422
chr1	105662001	105663000	1.4373e-08	5.66916e-07	-0.318438	chr1	105646630	105663676	uc007cgh.2_Pign	-	0	chr1	105663860	105665150	uc007cgi.2_2310035C23Rik	+	861
chr1	105972001	105973000	3.64538e-05	0.000282506	0.285817	chr1	105780722	105847981	uc007cgp.1_Tnfrsf11a	+	-124021	chr1	105990405	106034079	uc007cgq.3_Zcchc2	+	17406
chr1	106036001	106037000	3.27556e-06	4.07195e-05	-0.385126	chr1	106006014	106034079	uc007cgs.3_Zcchc2	+	-1923	chr1	106152624	106171524	uc029qsp.1_Gm20753	-	115625
chr1	106392001	106393000	7.27287e-06	7.71619e-05	-0.338019	chr1	106171868	106394245	uc007cgv.2_Phlpp1	+	0	chr1	106538177	106714290	uc007cgw.2_Bcl2	-	145178
chr1	106542001	106543000	2.50458e-05	0.000208787	0.47277	chr1	106541944	106575045	uc007cgx.1_AK085305	+	0	chr1	106711773	106714290	uc011wqb.2_Bcl2	-	168774
chr1	106875001	106876000	2.85675e-08	9.69858e-07	-0.742134	chr1	106870233	106883348	uc007chb.1_Serpinb5	+	0	chr1	106934448	106957080	uc007chc.2_Serpinb12	+	58449
chr1	106876001	106877000	5.65534e-06	6.32039e-05	-0.282576	chr1	106870233	106883348	uc007chb.1_Serpinb5	+	0	chr1	106934448	106957080	uc007chc.2_Serpinb12	+	57449
chr1	107064001	107065000	0.00112704	0.00468788	0.297959	chr1	107045586	107052303	uc007chg.2_Serpinb3a	-	-11699	chr1	107078192	107083480	uc007chh.1_Serpinb3d	-	13193
chr1	107325001	107326000	0.000311933	0.00163343	0.257876	chr1	107271200	107278371	uc007chk.2_Serpinb3c	-	-46631	chr1	107362313	107380475	uc007chl.1_Serpinb11	+	36314
chr1	107411001	107412000	1.25471e-06	1.89727e-05	-0.29838	chr1	107362313	107380475	uc007chl.1_Serpinb11	+	-30527	chr1	107422688	107452689	uc007chm.2_Serpinb7	+	10689
chr1	107675001	107676000	4.0172e-07	7.70072e-06	-0.298771	chr1	107590005	107608978	uc007cht.2_Serpinb8	+	-66024	chr1	107917258	107950947	uc007chu.1_D830032E09Rik	+	241259
chr1	108597001	108598000	1.63385e-06	2.33689e-05	-0.400483	chr1	107917258	107950947	uc011wqh.1_D830032E09Rik	+	-646055	chr1	108905310	108905349	uc029qsq.1_AB349811	+	307311
chr1	109310001	109311000	1.75453e-07	4.02673e-06	-0.436077	chr1	108905310	108905349	uc029qsq.1_AB349811	+	-404653	chr1	109982326	110065797	uc007chv.1_Cdh7	+	671327
chr1	111428001	111429000	8.37139e-08	2.24037e-06	0.288225	chr1	110889194	110977372	uc007chx.1_Cdh19	-	-450630	chr1	111858701	111864918	uc007chy.1_Dsel	-	429702
chr1	111461001	111462000	0.00219747	0.00813042	0.340707	chr1	110889194	110977372	uc007chx.1_Cdh19	-	-483630	chr1	111858701	111864918	uc007chy.1_Dsel	-	396702
chr1	112416001	112417000	6.82575e-07	1.16754e-05	0.285015	chr1	111858701	111864918	uc007chy.1_Dsel	-	-551084	chr1	115668987	115684619	uc007chz.1_AK043174	-	3251988
chr1	112816001	112817000	2.83215e-07	5.8381e-06	0.526542	chr1	111858701	111864918	uc007chy.1_Dsel	-	-951084	chr1	115668987	115684619	uc007chz.1_AK043174	-	2851988
chr1	113900001	113901000	0.000183439	0.00105662	0.306217	chr1	111858701	111864918	uc007chy.1_Dsel	-	-2035084	chr1	115668987	115684619	uc007chz.1_AK043174	-	1767988
chr1	114065001	114066000	0.000110925	0.000701815	-0.256786	chr1	111858701	111864918	uc007chy.1_Dsel	-	-2200084	chr1	115668987	115684619	uc007chz.1_AK043174	-	1602988
chr1	114206001	114207000	8.27321e-07	1.36104e-05	0.392545	chr1	111858701	111864918	uc007chy.1_Dsel	-	-2341084	chr1	115668987	115684619	uc007chz.1_AK043174	-	1461988
chr1	115068001	115069000	1.30804e-05	0.000123953	-0.365337	chr1	111858701	111864918	uc007chy.1_Dsel	-	-3203084	chr1	115668987	115684619	uc007chz.1_AK043174	-	599988
chr1	115395001	115396000	0.000263532	0.00142195	0.254255	chr1	111858701	111864918	uc007chy.1_Dsel	-	-3530084	chr1	115668987	115684619	uc007chz.1_AK043174	-	272988
chr1	115397001	115398000	0.000173732	0.00101092	0.362038	chr1	111858701	111864918	uc007chy.1_Dsel	-	-3532084	chr1	115668987	115684619	uc007chz.1_AK043174	-	270988
chr1	115641001	115642000	0.00129192	0.00524845	0.275389	chr1	111858701	111864918	uc007chy.1_Dsel	-	-3776084	chr1	115668987	115684619	uc007chz.1_AK043174	-	26988
chr1	116158001	116159000	4.42381e-05	0.000330828	0.264192	chr1	115685136	116580674	uc007cia.1_Cntnap5a	+	0	chr1	117473009	117473047	uc029qss.1_AB350709	-	1314010
chr1	116707001	116708000	0.0133505	0.0356826	-0.266242	chr1	115685136	116580674	uc007cia.1_Cntnap5a	+	-126328	chr1	117473009	117473047	uc029qss.1_AB350709	-	765010
chr1	116774001	116775000	0.000246695	0.00134624	0.25498	chr1	115685136	116580674	uc007cia.1_Cntnap5a	+	-193328	chr1	117473009	117473047	uc029qss.1_AB350709	-	698010
chr1	117912001	117913000	3.60414e-05	0.000279797	-0.339974	chr1	117656733	117656761	uc029qst.1_AB349505	-	-255241	chr1	118298517	118311132	uc007cib.1_Tsn	-	385518
chr1	117919001	117920000	0.00154066	0.0060728	-0.349838	chr1	117656733	117656761	uc029qst.1_AB349505	-	-262241	chr1	118298517	118311132	uc007cib.1_Tsn	-	378518
chr1	117953001	117954000	0.0151246	0.0395264	0.26403	chr1	117656733	117656761	uc029qst.1_AB349505	-	-296241	chr1	118298517	118311132	uc007cib.1_Tsn	-	344518
chr1	117954001	117955000	0.0133769	0.0357408	0.260687	chr1	117656733	117656761	uc029qst.1_AB349505	-	-297241	chr1	118298517	118311132	uc007cib.1_Tsn	-	343518
chr1	118180001	118181000	1.10297e-05	0.000108059	-0.253056	chr1	117656733	117656761	uc029qst.1_AB349505	-	-523241	chr1	118298517	118311132	uc007cib.1_Tsn	-	117518
chr1	118279001	118280000	4.17157e-06	4.93626e-05	0.40957	chr1	117656733	117656761	uc029qst.1_AB349505	-	-622241	chr1	118298517	118311132	uc007cib.1_Tsn	-	18518
chr1	118589001	118590000	2.65709e-08	9.17667e-07	-0.280843	chr1	118389057	118609462	uc007cij.2_Clasp1	+	0	chr1	118627944	118637766	uc007cik.1_Tfcp2l1	+	37945
chr1	118658001	118659000	0.000591954	0.002765	0.428669	chr1	118627944	118685168	uc007cil.1_Tfcp2l1	+	0	chr1	118834060	119053619	uc007cim.1_Gli2	-	175061
chr1	118719001	118720000	0.000749498	0.00335658	0.317693	chr1	118627944	118685168	uc007cil.1_Tfcp2l1	+	-33834	chr1	118834060	119053619	uc007cim.1_Gli2	-	114061
chr1	118720001	118721000	0.00223801	0.00825219	-0.333062	chr1	118627944	118685168	uc007cil.1_Tfcp2l1	+	-34834	chr1	118834060	119053619	uc007cim.1_Gli2	-	113061
chr1	118841001	118842000	0.0131975	0.0353416	0.325454	chr1	118834060	119053619	uc007cim.1_Gli2	-	0	chr1	118848382	119053619	uc007cin.1_Gli2	-	6383
chr1	119075001	119076000	1.32728e-05	0.000125432	0.530123	chr1	118848382	119053619	uc011wqr.1_Gli2	-	-21383	chr1	119329199	119385581	uc007ciq.1_AK039419	+	253200
chr1	119197001	119198000	0.00225395	0.00830099	-0.28068	chr1	118848382	119053619	uc011wqr.1_Gli2	-	-143383	chr1	119329199	119385581	uc007ciq.1_AK039419	+	131200
chr1	119409001	119410000	1.2576e-06	1.90048e-05	-0.276941	chr1	119329199	119385581	uc007ciq.1_AK039419	+	-23421	chr1	119415464	119422248	uc007cir.1_Inhbb	-	5465
chr1	119444001	119445000	1.07188e-05	0.000105641	0.291804	chr1	119415464	119422248	uc007cir.1_Inhbb	-	-21754	chr1	119470304	119504782	uc007cis.2_Ralb	-	25305
chr1	119491001	119492000	1.10778e-05	0.000108437	-0.4531	chr1	119470304	119504782	uc007cis.2_Ralb	-	0	chr1	119520092	119526359	uc007cit.1_AK053246	-	28093
chr1	119550001	119551000	1.60332e-08	6.1611e-07	0.254544	chr1	119545032	119649000	uc011wqs.1_Epb4.1l5	-	0	chr1	119594823	119648617	uc007cix.2_Epb4.1l5	-	43824
chr1	119891001	119892000	2.37086e-08	8.36375e-07	0.427225	chr1	119658092	119837071	uc007ciz.1_Ptpn4	-	-53931	chr1	119907898	119913168	uc007cja.2_Tmem177	-	15899
chr1	120338001	120339000	4.51114e-07	8.44138e-06	-0.30533	chr1	120226415	120271082	uc007cjj.1_Steap3	-	-66920	chr1	120340581	120343174	uc007cjk.1_C1ql2	+	1582
chr1	120479001	120480000	0.00177375	0.00682189	0.27762	chr1	120474537	120505084	uc007cjl.1_Marco	-	0	chr1	120602486	120607991	uc007cjm.2_En1	+	122487
chr1	120545001	120546000	2.68148e-06	3.47339e-05	0.292105	chr1	120474537	120505084	uc007cjl.1_Marco	-	-39918	chr1	120602486	120607991	uc007cjm.2_En1	+	56487
chr1	121082001	121083000	4.69317e-08	1.42567e-06	-0.328686	chr1	120602486	120607991	uc007cjm.2_En1	+	-474011	chr1	121087404	121120975	uc007cjn.2_Celrr	+	4405
chr1	121290001	121291000	0.00306432	0.0106726	-0.326953	chr1	121087404	121120975	uc033fkz.1_Celrr	+	-169027	chr1	121304352	121312325	uc011wqv.1_Insig2	-	13353
chr1	121551001	121552000	2.00246e-05	0.00017439	-0.261983	chr1	121509772	121528465	uc011wqx.1_Htr5b	-	-22537	chr1	121553834	121567980	uc007cjw.2_Ddx18	-	1835
chr1	122094001	122095000	0.000173937	0.00101191	0.385239	chr1	121553834	121567980	uc007cjw.2_Ddx18	-	-526022	chr1	123332137	124045559	uc007cjx.2_Dpp10	-	1237138
chr1	122592001	122593000	0.0139263	0.0369268	-0.30765	chr1	121553834	121567980	uc007cjw.2_Ddx18	-	-1024022	chr1	123332137	124045559	uc007cjx.2_Dpp10	-	739138
chr1	123200001	123201000	0.000768244	0.00342666	0.333969	chr1	121553834	121567980	uc007cjw.2_Ddx18	-	-1632022	chr1	123332137	124045559	uc007cjx.2_Dpp10	-	131138
chr1	123645001	123646000	0.00651964	0.0197952	0.329595	chr1	123332137	124045559	uc007cjx.2_Dpp10	-	0	chr1	123693982	123694003	uc029qsu.1_AB349811	+	47983
chr1	124270001	124271000	1.27938e-05	0.000121837	-0.406942	chr1	123332137	124045559	uc007cjx.2_Dpp10	-	-224443	chr1	124505756	124846039	uc007cjy.1_AK043935	-	234757
chr1	124538001	124539000	3.65891e-06	4.45111e-05	-0.30408	chr1	124505756	124846039	uc007cjy.1_AK043935	-	0	chr1	124643323	124643367	uc029qsv.1_AB349653	+	104324
chr1	124607001	124608000	0.000120032	0.000749065	0.429941	chr1	124505756	124846039	uc007cjy.1_AK043935	-	0	chr1	124643323	124643367	uc029qsv.1_AB349653	+	35324
chr1	125205001	125206000	0.000398375	0.00199559	0.263689	chr1	125176228	125176261	uc007ckd.2_DQ549908	+	-28741	chr1	125392904	125435727	uc007cke.2_Actr3	-	186905
chr1	125331001	125332000	2.71024e-07	5.63879e-06	-0.301974	chr1	125176228	125176261	uc007ckd.2_DQ549908	+	-154741	chr1	125392904	125435727	uc007cke.2_Actr3	-	60905
chr1	125779001	125780000	0.000526607	0.00251291	0.514874	chr1	125676995	125873861	uc007ckh.2_Gpr39	+	0	chr1	125872041	125911365	uc007cki.1_Lypd1	-	92042
chr1	125886001	125887000	0.000386948	0.0019485	-0.352094	chr1	125872041	125912214	uc007ckj.1_Lypd1	-	0	chr1	125913635	126382185	uc011wqy.1_Nckap5	-	26636
chr1	125974001	125975000	3.61624e-08	1.16583e-06	-0.644947	chr1	125913635	126830632	uc007ckn.1_Nckap5	-	0	chr1	126628871	126628915	uc029qtb.1_AB352792	-	653872
chr1	126269001	126270000	0.00943449	0.0268462	0.284095	chr1	125913635	126830632	uc007ckn.1_Nckap5	-	0	chr1	126628871	126628915	uc029qtb.1_AB352792	-	358872
chr1	126277001	126278000	1.22284e-08	5.01329e-07	-0.674835	chr1	125913635	126830632	uc007ckn.1_Nckap5	-	0	chr1	126628871	126628915	uc029qtb.1_AB352792	-	350872
chr1	126353001	126354000	0.000120293	0.000750504	-0.2752	chr1	125913635	126830632	uc007ckn.1_Nckap5	-	0	chr1	126628871	126628915	uc029qtb.1_AB352792	-	274872
chr1	126406001	126407000	0.000185357	0.00106604	0.31066	chr1	125913635	126830632	uc007ckn.1_Nckap5	-	0	chr1	126628871	126628915	uc029qtb.1_AB352792	-	221872
chr1	126492001	126493000	0.00885171	0.0254797	0.321032	chr1	125913635	126830632	uc007ckn.1_Nckap5	-	0	chr1	126628871	126628915	uc029qtb.1_AB352792	-	135872
chr1	127054001	127055000	0.00012754	0.000786018	0.478874	chr1	126872202	126876589	uc007cko.1_AK016413	-	-177413	chr1	127204985	127388212	uc007ckp.1_Mgat5	+	149986
chr1	127067001	127068000	2.86699e-05	0.000232755	0.337184	chr1	126872202	126876589	uc007cko.1_AK016413	-	-190413	chr1	127204985	127388212	uc007ckp.1_Mgat5	+	136986
chr1	127528001	127529000	0.00242785	0.00881082	0.538177	chr1	127490341	127678021	uc011wqz.1_Tmem163	-	0	chr1	127592394	127592431	uc029qtc.1_AB349653	+	63395
chr1	127575001	127576000	1.99142e-09	1.25603e-07	-0.49937	chr1	127490341	127678021	uc011wqz.1_Tmem163	-	0	chr1	127592394	127592431	uc029qtc.1_AB349653	+	16395
chr1	127619001	127620000	2.10684e-06	2.86381e-05	-0.335546	chr1	127490341	127678021	uc011wqz.1_Tmem163	-	0	chr1	127729412	127767564	uc007ckv.1_Acmsd	+	109413
chr1	127660001	127661000	1.07081e-10	1.32775e-08	-0.444237	chr1	127490341	127678021	uc011wqz.1_Tmem163	-	0	chr1	127729412	127767564	uc007ckv.1_Acmsd	+	68413
chr1	127748001	127749000	2.10569e-08	7.64066e-07	-0.381933	chr1	127729412	127767564	uc007ckv.1_Acmsd	+	0	chr1	127753616	127774054	uc007ckw.2_2900009J06Rik	-	4617
chr1	127855001	127856000	2.48839e-09	1.48523e-07	0.419772	chr1	127815270	127840290	uc011wra.1_Map3k19	-	-14712	chr1	127868772	127943876	uc007clc.2_Rab3gap1	+	12773
chr1	128367001	128368000	2.92249e-06	3.71914e-05	0.319783	chr1	128363706	128417416	uc007clp.2_Dars	-	0	chr1	128412117	128417416	uc007clr.2_Dars	-	44118
chr1	128621001	128622000	8.64827e-07	1.40884e-05	0.456722	chr1	128588198	128592299	uc007clt.1_Cxcr4	-	-28703	chr1	129273303	129431053	uc007clu.2_Thsd7b	+	651304
chr1	128727001	128728000	0.00395066	0.0131401	-0.415031	chr1	128588198	128592299	uc007clt.1_Cxcr4	-	-134703	chr1	129273303	129431053	uc007clu.2_Thsd7b	+	545304
chr1	129273001	129274000	3.48784e-06	4.27941e-05	0.383381	chr1	128588198	128592299	uc007clt.1_Cxcr4	-	-680703	chr1	129273303	130219278	uc007clv.2_Thsd7b	+	0
chr1	129274001	129275000	8.74834e-08	2.32169e-06	0.312767	chr1	129273303	130219278	uc007clv.2_Thsd7b	+	0	chr1	129915538	130183181	uc007clw.1_Thsd7b	+	640539
chr1	129405001	129406000	0.000122175	0.000759598	-0.271095	chr1	129273303	130219278	uc007clv.2_Thsd7b	+	0	chr1	129915538	130183181	uc007clw.1_Thsd7b	+	509539
chr1	130006001	130007000	3.84421e-18	2.47374e-15	-0.264064	chr1	129915538	130183181	uc007clw.1_Thsd7b	+	0	chr1	130388527	130422999	uc007clx.1_Daf2	-	381528
chr1	130271001	130272000	7.81441e-06	8.17801e-05	-0.587611	chr1	129273303	130219278	uc007clv.2_Thsd7b	+	-51724	chr1	130388527	130422999	uc007clx.1_Daf2	-	116528
chr1	130273001	130274000	0.00313603	0.0108745	-0.317039	chr1	129273303	130219278	uc007clv.2_Thsd7b	+	-53724	chr1	130388527	130422999	uc007clx.1_Daf2	-	114528
chr1	130462001	130463000	4.15648e-06	4.92486e-05	0.33332	chr1	130448915	130462740	uc029qte.1_Cd55	-	0	chr1	130576705	130629606	uc007cmb.2_Zp3r	-	113706
chr1	130488001	130489000	0.000249222	0.00135777	-0.337074	chr1	130448915	130462740	uc029qte.1_Cd55	-	-25262	chr1	130576705	130629606	uc007cmb.2_Zp3r	-	87706
chr1	130490001	130491000	0.000186294	0.0010706	-0.347768	chr1	130448915	130462740	uc029qte.1_Cd55	-	-27262	chr1	130576705	130629606	uc007cmb.2_Zp3r	-	85706
chr1	130734001	130735000	9.30104e-06	9.41956e-05	0.259262	chr1	130731975	130744622	uc007cmi.2_AA986860	+	0	chr1	130740271	130744622	uc007cmj.2_AA986860	+	5272
chr1	130793001	130794000	4.06036e-09	2.16691e-07	0.286715	chr1	130740271	130744622	uc007cmj.2_AA986860	+	-48380	chr1	130800901	130814740	uc007cmk.1_Fcamr	+	6902
chr1	130878001	130879000	8.76667e-07	1.42396e-05	0.281262	chr1	130865776	130880790	uc007cmn.1_Faim3	+	0	chr1	130882073	130885996	uc007cmo.1_Il24	-	3074
chr1	131059001	131060000	1.13527e-08	4.7343e-07	-0.512318	chr1	131053703	131097543	uc007cmv.1_Mapkapk2	-	0	chr1	131128440	131138234	uc007cmw.1_Dyrk3	-	68441
chr1	131118001	131119000	2.9618e-06	3.75674e-05	-0.314483	chr1	131053703	131097543	uc007cmv.1_Mapkapk2	-	-20459	chr1	131128440	131138234	uc007cmw.1_Dyrk3	-	9441
chr1	131301001	131302000	5.96772e-05	0.000423303	0.405959	chr1	131294987	131333070	uc007cni.1_Srgap2	-	0	chr1	131329513	131525593	uc011wrq.1_Srgap2	-	27514
chr1	131544001	131545000	9.32857e-09	4.078e-07	-0.43135	chr1	131527988	131539872	uc007cnk.1_Fam72a	+	-4130	chr1	131599113	131612000	uc007cnl.1_Avpr1b	+	54114
chr1	131600001	131601000	1.0079e-08	4.31925e-07	-0.317127	chr1	131599113	131612000	uc007cnl.1_Avpr1b	+	0	chr1	131638313	131651545	uc007cnm.1_Ctse	+	37314
chr1	131868001	131869000	7.53452e-09	3.48316e-07	-0.273409	chr1	131867518	131872889	uc007cnw.2_Rab7l1	+	0	chr1	131910457	131936321	uc007cnx.2_Nucks1	+	41458
chr1	132188001	132189000	0.000116301	0.000729948	0.267044	chr1	132113546	132139685	uc007coh.2_Cdk18	-	-48317	chr1	132191435	132209546	uc007coi.2_Lemd1	+	2436
chr1	132196001	132197000	6.84615e-06	7.36457e-05	-0.612833	chr1	132191435	132257382	uc007cok.2_Lemd1	+	0	chr1	132198087	132198184	uc011wrv.1_Mir135b	+	1088
chr1	132233001	132234000	0.000147148	0.000882878	0.27381	chr1	132226313	132257382	uc007com.2_Lemd1	+	0	chr1	132298625	132307357	uc007con.1_Klhdc8a	+	64626
chr1	132319001	132320000	7.27986e-08	2.01648e-06	0.291088	chr1	132316124	132333488	uc007cop.2_Nuak2	+	0	chr1	132342022	132349262	uc007coq.1_AK155877	+	22023
chr1	132330001	132331000	0.000231157	0.00127652	0.336509	chr1	132316124	132333488	uc007cop.2_Nuak2	+	0	chr1	132342022	132349262	uc007coq.1_AK155877	+	11023
chr1	132368001	132369000	1.96651e-09	1.24542e-07	0.346857	chr1	132356314	132391281	uc007cot.1_Tmcc2	-	0	chr1	132417452	132449975	uc011wrw.1_Dstyk	+	48453
chr1	132377001	132378000	9.90178e-11	1.24945e-08	-0.774933	chr1	132356314	132391281	uc007cot.1_Tmcc2	-	0	chr1	132417452	132449975	uc011wrw.1_Dstyk	+	39453
chr1	132412001	132413000	5.89603e-05	0.000418916	0.27643	chr1	132356314	132391281	uc007cot.1_Tmcc2	-	-20721	chr1	132417452	132449975	uc011wrw.1_Dstyk	+	4453
chr1	132455001	132456000	1.27129e-10	1.50813e-08	-0.33544	chr1	132454574	132457639	uc007cov.1_Dstyk	+	0	chr1	132477366	132504490	uc007cow.2_Rbbp5	+	21367
chr1	132514001	132515000	2.42217e-06	3.20868e-05	0.280967	chr1	132509426	132523485	uc007cpc.1_Cntn2	-	0	chr1	132564689	132642858	uc011wrx.1_Nfasc	-	49690
chr1	132539001	132540000	6.1317e-05	0.000432864	0.450151	chr1	132509424	132542940	uc007cpb.1_Cntn2	-	0	chr1	132564689	132642858	uc011wrx.1_Nfasc	-	24690
chr1	132562001	132563000	5.5713e-05	0.000399548	0.26739	chr1	132509424	132542940	uc007cpb.1_Cntn2	-	-19062	chr1	132564689	132642858	uc011wrx.1_Nfasc	-	1690
chr1	132582001	132583000	1.00675e-12	2.99821e-10	0.696145	chr1	132564689	132741797	uc007cpf.2_Nfasc	-	0	chr1	132599845	132741797	uc007cpg.2_Nfasc	-	16846
chr1	132653001	132654000	3.24543e-06	4.04404e-05	-0.456476	chr1	132599845	132741797	uc007cpg.2_Nfasc	-	0	chr1	132668594	132694593	uc007cph.1_BC040754	+	14595
chr1	132679001	132680000	0.00119385	0.00491805	-0.29071	chr1	132668594	132694593	uc007cph.1_BC040754	+	0	chr1	132729352	132732826	uc029qth.1_Gm10538	+	49353
chr1	132761001	132762000	1.93881e-07	4.33747e-06	-0.320027	chr1	132599845	132741797	uc007cpg.2_Nfasc	-	-19205	chr1	132880354	132940005	uc007cpi.2_Lrrn2	+	118355
chr1	132767001	132768000	7.91257e-09	3.6063e-07	-0.649261	chr1	132599845	132741797	uc007cpg.2_Nfasc	-	-25205	chr1	132880354	132940005	uc007cpi.2_Lrrn2	+	112355
chr1	132821001	132822000	1.27595e-07	3.13201e-06	-0.290919	chr1	132599845	132741797	uc007cpg.2_Nfasc	-	-79205	chr1	132880354	132940005	uc007cpi.2_Lrrn2	+	58355
chr1	132885001	132886000	7.57325e-07	1.26805e-05	0.347837	chr1	132880354	132940005	uc007cpi.2_Lrrn2	+	0	chr1	132937198	132939391	uc033flc.1_Lrrn2	+	51199
chr1	132975001	132976000	1.4007e-07	3.37369e-06	-0.341912	chr1	132880354	132940005	uc007cpi.2_Lrrn2	+	-34997	chr1	132986671	132988651	uc007cpj.3_AB349340	-	10672
chr1	133024001	133025000	4.34378e-05	0.000326025	-0.265119	chr1	132989844	133030583	uc007cpp.1_Mdm4	-	0	chr1	133033961	133034034	uc033fld.1_TRNA-Lys	+	8962
chr1	133033001	133034000	3.35679e-05	0.00026439	0.327739	chr1	132989844	133030583	uc007cpp.1_Mdm4	-	-2419	chr1	133033961	133034034	uc033fld.1_TRNA-Lys	+	0
chr1	133130001	133131000	2.33567e-05	0.00019732	0.263935	chr1	133046011	133108688	uc011wry.1_Pik3c2b	+	-21314	chr1	133131165	133139800	uc007cpt.2_Ppp1r15b	+	166
chr1	133205001	133206000	5.41639e-07	9.74006e-06	-0.376044	chr1	133131343	133139800	uc007cps.2_Ppp1r15b	+	-65202	chr1	133246096	133303435	uc007cpu.2_Plekha6	+	40097
chr1	133304001	133305000	0.000358495	0.00183116	0.271615	chr1	133272208	133303435	uc007cpx.2_Plekha6	+	-567	chr1	133309822	133323026	uc007cqa.1_Golt1a	+	4823
chr1	133356001	133357000	6.15699e-07	1.0768e-05	-0.61539	chr1	133350565	133360323	uc007cqf.1_Ren2	+	0	chr1	133363571	133374723	uc011wsa.2_Etnk2	+	6572
chr1	133366001	133367000	1.90644e-06	2.64182e-05	-0.276102	chr1	133365331	133380319	uc007cqi.3_Etnk2	+	0	chr1	133382299	133390645	uc007cqj.1_Sox13	-	15300
chr1	133408001	133409000	4.13514e-07	7.88e-06	-0.428428	chr1	133382299	133424212	uc007cqk.1_Sox13	-	0	chr1	133603870	133610280	uc007cql.2_Snrpe	-	194871
chr1	133409001	133410000	0.000236762	0.00130165	0.284529	chr1	133382299	133424212	uc007cqk.1_Sox13	-	0	chr1	133603870	133610280	uc007cql.2_Snrpe	-	193871
chr1	133571001	133572000	3.39371e-06	4.18805e-05	-0.464795	chr1	133382299	133424212	uc007cqk.1_Sox13	-	-146790	chr1	133603870	133610280	uc007cql.2_Snrpe	-	31871
chr1	133572001	133573000	3.69609e-08	1.18654e-06	0.368652	chr1	133382299	133424212	uc007cqk.1_Sox13	-	-147790	chr1	133603870	133610280	uc007cql.2_Snrpe	-	30871
chr1	133677001	133678000	2.0549e-07	4.53709e-06	0.325183	chr1	133654236	133661399	uc007cqq.2_Zc3h11a	-	-15603	chr1	133679028	133690016	uc007cqt.2_Lax1	-	1029
chr1	133692001	133693000	0.000752342	0.0033667	0.28843	chr1	133679028	133690108	uc007cqs.2_Lax1	-	-1894	chr1	133702673	133753749	uc007cqu.3_Atp2b4	-	9674
chr1	133773001	133774000	7.38424e-05	0.000503181	-0.316748	chr1	133737989	133800754	uc007cqx.1_Atp2b4	-	0	chr1	133897193	133907173	uc007cqy.2_Optc	-	123194
chr1	134423001	134424000	0.00980485	0.0276904	-0.269162	chr1	134415759	134432341	uc007cry.1_Adipor1	+	0	chr1	134455554	134466570	uc007crz.1_Klhl12	+	31555
chr1	134492001	134493000	7.98537e-11	1.05975e-08	-0.33457	chr1	134455554	134490873	uc007csb.1_Klhl12	+	-1129	chr1	134494659	134507884	uc007csc.1_Rabif	+	1660
chr1	134551001	134552000	0.00120815	0.00496691	0.299267	chr1	134540944	134547183	uc011wsf.1_4931440L10Rik	-	-3819	chr1	134560177	134606791	uc007csf.2_Kdm5b	+	8178
chr1	134639001	134640000	2.21326e-05	0.000188933	0.25621	chr1	134560177	134632878	uc011wsg.1_Kdm5b	+	-6124	chr1	134646680	134741976	uc007csi.1_Syt2	+	6681
chr1	134683001	134684000	1.01905e-06	1.60444e-05	-0.345716	chr1	134646680	134749417	uc007csj.1_Syt2	+	0	chr1	134709299	134749417	uc007csk.1_Syt2	+	25300
chr1	134697001	134698000	1.78237e-09	1.15914e-07	0.260302	chr1	134646680	134749417	uc007csj.1_Syt2	+	0	chr1	134709299	134749417	uc007csk.1_Syt2	+	11300
chr1	134801001	134802000	5.09106e-06	5.80615e-05	0.643528	chr1	134779722	134803721	uc007cso.3_Ppp1r12b	-	0	chr1	134962564	134974179	uc007csp.2_Ube2t	+	160565
chr1	134976001	134977000	0.0014769	0.00586551	-0.273805	chr1	134962564	134974179	uc033flk.1_Ube2t	+	-1823	chr1	134986352	135105276	uc007csq.1_Lgr6	-	9353
chr1	135057001	135058000	0.0111839	0.0308384	0.287256	chr1	134986352	135105276	uc007csq.1_Lgr6	-	0	chr1	135108497	135132575	uc007csr.2_Ptprv	-	50498
chr1	135234001	135235000	0.003659	0.0123329	0.331176	chr1	135160249	135167681	uc007csv.2_Gpr37l1	-	-66321	chr1	135253573	135258472	uc007csw.2_Elf3	-	18574
chr1	135236001	135237000	7.03012e-05	0.000483712	0.61998	chr1	135160249	135167681	uc007csv.2_Gpr37l1	-	-68321	chr1	135253573	135258472	uc007csw.2_Elf3	-	16574
chr1	135241001	135242000	1.30536e-05	0.000123769	0.504771	chr1	135160249	135167681	uc007csv.2_Gpr37l1	-	-73321	chr1	135253573	135258472	uc007csw.2_Elf3	-	11574
chr1	135358001	135359000	4.32111e-10	3.90715e-08	0.297335	chr1	135324812	135368065	uc007cta.1_Lmod1	+	0	chr1	135371246	135371760	uc029qtj.1_AK181950	-	12247
chr1	135359001	135360000	9.74637e-05	0.000630727	0.309409	chr1	135324812	135368065	uc007cta.1_Lmod1	+	0	chr1	135371246	135371760	uc029qtj.1_AK181950	-	11247
chr1	135617001	135618000	1.12688e-07	2.84137e-06	-0.30611	chr1	135606446	135688105	uc007ctn.1_AK158038	-	0	chr1	135729196	135752229	uc007cto.1_Csrp1	+	111197
chr1	135635001	135636000	4.26468e-08	1.33104e-06	0.298288	chr1	135606446	135688105	uc007ctn.1_AK158038	-	0	chr1	135729196	135752229	uc007cto.1_Csrp1	+	93197
chr1	135637001	135638000	1.7211e-06	2.43576e-05	-0.507304	chr1	135606446	135688105	uc007ctn.1_AK158038	-	0	chr1	135729196	135752229	uc007cto.1_Csrp1	+	91197
chr1	135686001	135687000	5.42664e-13	1.76589e-10	0.541654	chr1	135606446	135688105	uc007ctn.1_AK158038	-	0	chr1	135729196	135752229	uc007cto.1_Csrp1	+	42197
chr1	135719001	135720000	7.52162e-08	2.06855e-06	-0.258831	chr1	135606446	135688105	uc007ctn.1_AK158038	-	-30897	chr1	135729196	135752229	uc007cto.1_Csrp1	+	9197
chr1	135759001	135760000	9.24193e-05	0.000603751	0.279759	chr1	135729196	135752229	uc007cto.1_Csrp1	+	-6773	chr1	135766084	135769134	uc007ctq.2_Phlda3	+	6085
chr1	135891001	135892000	2.3479e-06	3.12753e-05	-0.45272	chr1	135872949	135919024	uc011wss.1_Pkp1	-	0	chr1	135953577	135963242	uc007cud.2_Igfn1	-	61578
chr1	135918001	135919000	2.18335e-08	7.85596e-07	0.259842	chr1	135872949	135919024	uc011wss.1_Pkp1	-	0	chr1	135953577	135963242	uc007cud.2_Igfn1	-	34578
chr1	136040001	136041000	0.000122603	0.000761554	0.650945	chr1	136019657	136035030	uc011wsx.1_Tmem9	+	-4972	chr1	136050803	136051370	uc033fly.1_Ascl5	+	9804
chr1	136142001	136143000	0.00100448	0.00426517	0.391051	chr1	136131400	136178014	uc007cum.1_Kif21b	+	0	chr1	136181651	136190712	uc007cun.1_Mroh3	-	38652
chr1	136205001	136206000	0.000214583	0.00120063	0.345204	chr1	136181651	136190712	uc007cun.1_Mroh3	-	-14290	chr1	136213521	136234280	uc007cuo.2_5730559C18Rik	-	7522
chr1	136264001	136265000	1.14049e-05	0.000111019	0.454115	chr1	136258913	136260873	uc011wsy.1_Gpr25	-	-3129	chr1	136268122	136282499	uc011wsz.1_Camsap2	-	3123
chr1	136361001	136362000	4.77005e-08	1.44443e-06	-0.405072	chr1	136277193	136346104	uc011wta.1_Camsap2	-	-14898	chr1	136411915	136415519	uc007cus.1_9230116N13Rik	-	49916
chr1	136445001	136446000	1.18668e-06	1.81426e-05	-0.267296	chr1	136415270	136440220	uc007cuu.2_Ddx59	+	-4782	chr1	136467847	136531511	uc007cuv.1_Kif14	+	21848
chr1	136657001	136658000	1.08509e-09	7.88799e-08	-0.396743	chr1	136624900	136630391	uc007cux.2_Zfp281	+	-26611	chr1	136683395	136690805	uc029qtl.1_Gm19705	+	25396
chr1	136684001	136685000	3.31165e-07	6.62092e-06	-0.377833	chr1	136683628	136690805	uc029qtm.1_Gm19705	+	0	chr1	136696210	136725728	uc007cuy.1_Gm16880	+	11211
chr1	137190001	137191000	1.88143e-06	2.6164e-05	-0.58973	chr1	137031386	137031406	uc029qtn.1_JA187517	-	-158596	chr1	137928388	137969240	uc007cvd.1_AK076660	-	737389
chr1	137389001	137390000	7.2892e-08	2.01823e-06	0.693948	chr1	137031386	137031406	uc029qtn.1_JA187517	-	-357596	chr1	137928388	137969240	uc007cvd.1_AK076660	-	538389
chr1	137390001	137391000	1.67948e-05	0.000151559	0.589912	chr1	137031386	137031406	uc029qtn.1_JA187517	-	-358596	chr1	137928388	137969240	uc007cvd.1_AK076660	-	537389
chr1	138136001	138137000	1.61488e-05	0.000146848	0.325263	chr1	138119472	138175305	uc007cvk.2_Ptprc	-	0	chr1	138190215	138192093	uc007cvl.1_AK040222	-	53216
chr1	138186001	138187000	1.1373e-07	2.86233e-06	0.384895	chr1	138119472	138175305	uc007cvk.2_Ptprc	-	-10697	chr1	138190215	138192093	uc007cvl.1_AK040222	-	3216
chr1	138609001	138610000	3.39293e-06	4.1876e-05	0.396814	chr1	138513747	138619696	uc007cvo.1_Nek7	-	0	chr1	138640094	138682075	uc007cvp.1_Gm5833	-	30095
chr1	138847001	138848000	0.000516349	0.00247339	0.417928	chr1	138825193	138847344	uc007cvt.1_Lhx9	-	0	chr1	138851978	138856519	uc007cvv.1_2310009B15Rik	-	3979
chr1	138848001	138849000	0.00292887	0.0102812	0.383392	chr1	138825185	138847579	uc007cvs.1_Lhx9	-	-423	chr1	138851978	138856519	uc007cvv.1_2310009B15Rik	-	2979
chr1	138930001	138931000	7.59406e-06	7.98835e-05	-0.304436	chr1	138876273	138876950	uc007cvx.1_AK006139	-	-53052	chr1	138963708	139063715	uc007cvy.2_Dennd1b	+	32709
chr1	138990001	138991000	1.22178e-10	1.46502e-08	0.380488	chr1	138967720	139176042	uc007cvz.2_Dennd1b	+	0	chr1	139121754	139176042	uc011wtc.1_Dennd1b	+	130755
chr1	139236001	139237000	0.000127982	0.000788326	-0.373052	chr1	139229537	139377076	uc007cwd.1_Crb1	-	0	chr1	139245616	139255760	uc007cwe.1_Crb1	-	8617
chr1	139318001	139319000	0.000162401	0.000956739	0.286059	chr1	139245616	139377076	uc007cwf.1_Crb1	-	0	chr1	139379451	139402852	uc029qto.1_4933436E23Rik	+	60452
chr1	139926001	139927000	3.8578e-05	0.00029576	0.529074	chr1	139810291	140018921	uc007cwr.1_Cfhr2	-	0	chr1	140085854	140183411	uc007cws.1_Cfh	-	158855
chr1	140206001	140207000	0.000277501	0.00148234	0.389054	chr1	140145218	140183411	uc007cwu.1_Cfh	-	-22591	chr1	140246256	140610261	uc011wth.1_Kcnt2	+	39257
chr1	140722001	140723000	0.000576473	0.00270494	-0.258518	chr1	140570175	140656402	uc029qtp.1_4930590L20Rik	-	-65600	chr1	140796241	140796265	uc029qtq.1_AB351889	-	73242
chr1	141800001	141801000	2.2818e-07	4.91923e-06	-0.558675	chr1	141277296	141277317	uc029qtr.1_JA187517	+	-522685	chr1	143604100	143606608	uc011wti.1_AK153645	-	1803101
chr1	141867001	141868000	0.0012928	0.00525128	-0.311313	chr1	141277296	141277317	uc029qtr.1_JA187517	+	-589685	chr1	143604100	143606608	uc011wti.1_AK153645	-	1736101
chr1	142273001	142274000	0.00015999	0.000945165	-0.323345	chr1	141277296	141277317	uc029qtr.1_JA187517	+	-995685	chr1	143604100	143606608	uc011wti.1_AK153645	-	1330101
chr1	142466001	142467000	3.19629e-05	0.000254017	-0.259792	chr1	141277296	141277317	uc029qtr.1_JA187517	+	-1188685	chr1	143604100	143606608	uc011wti.1_AK153645	-	1137101
chr1	142977001	142978000	5.23569e-09	2.63932e-07	-0.461419	chr1	141277296	141277317	uc029qtr.1_JA187517	+	-1699685	chr1	143604100	143606608	uc011wti.1_AK153645	-	626101
chr1	145305001	145306000	8.2049e-07	1.35161e-05	0.465811	chr1	144752840	144775421	uc007cxl.1_Rgs18	-	-529581	chr1	145528950	145528978	uc029qtt.1_AB350709	+	222951
chr1	145509001	145510000	0.0154688	0.040251	-0.350847	chr1	144752840	144775421	uc007cxl.1_Rgs18	-	-733581	chr1	145528950	145528978	uc029qtt.1_AB350709	+	18951
chr1	145519001	145520000	6.65052e-05	0.000462233	0.308004	chr1	144752840	144775421	uc007cxl.1_Rgs18	-	-743581	chr1	145528950	145528978	uc029qtt.1_AB350709	+	8951
chr1	145844001	145845000	2.61968e-07	5.4886e-06	-0.387296	chr1	145534296	145534324	uc029qtv.1_AB350709	+	-309678	chr1	146419435	146495041	uc007cxm.1_AK158929	-	574436
chr1	146306001	146307000	3.78918e-07	7.34594e-06	-0.336186	chr1	145534296	145534324	uc029qtv.1_AB350709	+	-771678	chr1	146419435	146495041	uc007cxm.1_AK158929	-	112436
chr1	146870001	146871000	3.94309e-06	4.7202e-05	-0.290125	chr1	146497686	146902472	uc007cxq.2_Brinp3	+	0	chr1	147763815	147763836	uc029qtw.1_JA187517	-	892816
chr1	147827001	147828000	0.00940917	0.0267858	0.271927	chr1	147763815	147763836	uc029qtw.1_JA187517	-	-63166	chr1	148578225	148578246	uc029qtx.1_JA187517	-	750226
chr1	147928001	147929000	0.000128222	0.000789611	0.263841	chr1	147763815	147763836	uc029qtw.1_JA187517	-	-164166	chr1	148578225	148578246	uc029qtx.1_JA187517	-	649226
chr1	148096001	148097000	4.51357e-09	2.3511e-07	-0.292254	chr1	147763815	147763836	uc029qtw.1_JA187517	-	-332166	chr1	148578225	148578246	uc029qtx.1_JA187517	-	481226
chr1	148314001	148315000	4.23479e-08	1.3236e-06	-0.500448	chr1	147763815	147763836	uc029qtw.1_JA187517	-	-550166	chr1	148578225	148578246	uc029qtx.1_JA187517	-	263226
chr1	148522001	148523000	0.00208068	0.00776811	0.250105	chr1	147763815	147763836	uc029qtw.1_JA187517	-	-758166	chr1	148578225	148578246	uc029qtx.1_JA187517	-	55226
chr1	149250001	149251000	9.67905e-06	9.72512e-05	-0.320074	chr1	148578225	148578246	uc029qtx.1_JA187517	-	-671756	chr1	149420981	149449950	uc007cxs.1_AK042726	-	169982
chr1	149477001	149478000	2.57113e-05	0.000213333	0.340817	chr1	149420981	149449950	uc007cxs.1_AK042726	-	-27052	chr1	149829621	149961284	uc007cxt.1_Pla2g4a	-	351622
chr1	149545001	149546000	3.81783e-11	5.85931e-09	0.264763	chr1	149420981	149449950	uc007cxs.1_AK042726	-	-95052	chr1	149829621	149961284	uc007cxt.1_Pla2g4a	-	283622
chr1	149658001	149659000	0.000848732	0.00371576	-0.522141	chr1	149420981	149449950	uc007cxs.1_AK042726	-	-208052	chr1	149829621	149961284	uc007cxt.1_Pla2g4a	-	170622
chr1	150269001	150270000	4.69435e-09	2.42132e-07	-0.304367	chr1	150159042	150164948	uc033fmh.1_Lincrna-cox2	-	-104054	chr1	150319416	150333903	uc007cxx.2_Pdc	+	49417
chr1	150894001	150895000	2.47962e-06	3.26741e-05	0.314668	chr1	150873747	150993435	uc007cyl.1_Hmcn1	-	0	chr1	151138033	151144095	uc029qtz.1_C730036E19Rik	+	243034
chr1	151227001	151228000	0.00105216	0.00443196	-0.264908	chr1	151138033	151144095	uc029qtz.1_C730036E19Rik	+	-82907	chr1	151344497	151356798	uc007cym.1_Ivns1abp	+	116498
chr1	151244001	151245000	2.12815e-09	1.31492e-07	-0.293829	chr1	151138033	151144095	uc029qtz.1_C730036E19Rik	+	-99907	chr1	151344497	151356798	uc007cym.1_Ivns1abp	+	99498
chr1	151335001	151336000	6.93854e-06	7.44476e-05	-0.261446	chr1	151138033	151144095	uc029qtz.1_C730036E19Rik	+	-190907	chr1	151344497	151356798	uc007cym.1_Ivns1abp	+	8498
chr1	151541001	151542000	5.62887e-06	6.2996e-05	0.537675	chr1	151469405	151500823	uc007cyy.1_Rnf2	-	-40179	chr1	151571372	151690182	uc011wtn.1_Fam129a	+	29373
chr1	151817001	151818000	4.0716e-08	1.28301e-06	0.457145	chr1	151755373	151822328	uc011wtq.1_Edem3	+	0	chr1	151852402	152090320	uc007czd.2_1700025G04Rik	-	34403
chr1	151878001	151879000	0.000795789	0.0035282	0.251102	chr1	151852402	152090320	uc007czd.2_1700025G04Rik	-	0	chr1	151884523	152090320	uc007cze.2_1700025G04Rik	-	5524
chr1	152256001	152257000	6.68287e-06	7.22661e-05	-0.561818	chr1	151884523	152090320	uc007cze.2_1700025G04Rik	-	-165682	chr1	152370735	152386682	uc007czf.2_Tsen15	-	113736
chr1	152419001	152420000	0.000864932	0.00377373	0.351792	chr1	152399866	152510695	uc011wtr.1_Colgalt2	+	0	chr1	152517529	152625111	uc007czh.1_Rgl1	-	97530
chr1	152497001	152498000	2.82495e-10	2.83101e-08	-0.486488	chr1	152399866	152510695	uc011wtr.1_Colgalt2	+	0	chr1	152517529	152625111	uc007czh.1_Rgl1	-	19530
chr1	152674001	152675000	5.2693e-08	1.56251e-06	0.510244	chr1	152517529	152625111	uc007czh.1_Rgl1	-	-48891	chr1	152750550	152757544	uc007czi.1_Apobec4	+	75551
chr1	152797001	152798000	6.57444e-05	0.000458059	-0.462277	chr1	152768860	152775580	uc007czk.2_Arpc5	+	-21422	chr1	152807256	152836990	uc007czm.1_Ncf2	+	9257
chr1	153092001	153093000	0.000296424	0.00156504	0.394485	chr1	152955100	153119261	uc011wts.1_Nmnat2	+	0	chr1	153122755	153186447	uc007czr.1_Lamc2	-	29756
chr1	153180001	153181000	3.47881e-06	4.26964e-05	0.559784	chr1	153157308	153186447	uc007czt.1_Lamc2	-	0	chr1	153218921	153332786	uc007czu.1_Lamc1	-	37922
chr1	153273001	153274000	0.0038265	0.0127964	-0.273558	chr1	153218921	153332786	uc007czu.1_Lamc1	-	0	chr1	153404185	153407790	uc007czv.2_E330020D12Rik	-	130186
chr1	153322001	153323000	2.80099e-05	0.00022837	0.270488	chr1	153218921	153332786	uc007czu.1_Lamc1	-	0	chr1	153404185	153407790	uc007czv.2_E330020D12Rik	-	81186
chr1	153345001	153346000	6.6511e-05	0.000462258	0.41194	chr1	153218921	153332786	uc007czu.1_Lamc1	-	-12216	chr1	153404185	153407790	uc007czv.2_E330020D12Rik	-	58186
chr1	153346001	153347000	1.99033e-05	0.00017353	0.501407	chr1	153218921	153332786	uc007czu.1_Lamc1	-	-13216	chr1	153404185	153407790	uc007czv.2_E330020D12Rik	-	57186
chr1	153621001	153622000	0.000160689	0.000948763	0.365771	chr1	153503015	153549714	uc007dac.1_Npl	-	-71288	chr1	153653036	153697665	uc007dad.1_Rgs8	+	31037
chr1	153698001	153699000	8.7181e-06	8.94186e-05	0.406848	chr1	153653036	153697665	uc007dad.1_Rgs8	+	-337	chr1	153721239	153737829	uc029que.1_C230024C17Rik	-	22240
chr1	153793001	153794000	9.18535e-42	1.82005e-38	-0.316116	chr1	153792620	153821573	uc007dal.2_Rgsl1	-	0	chr1	153849541	153851195	uc007dam.1_5830403L16Rik	-	55542
chr1	153807001	153808000	9.72792e-07	1.54657e-05	0.430486	chr1	153792620	153821573	uc007dal.2_Rgsl1	-	0	chr1	153849541	153851195	uc007dam.1_5830403L16Rik	-	41542
chr1	153877001	153878000	0.00227935	0.00837763	-0.287904	chr1	153850616	153900208	uc007dan.1_AK044033	-	0	chr1	153891645	153893060	uc007dap.2_Teddm1	+	13646
chr1	153964001	153965000	1.55575e-05	0.000142488	-0.294471	chr1	153899928	153909723	uc007daq.2_Glul	+	-54279	chr1	154037596	154116153	uc007dar.1_AK043564	-	72597
chr1	154148001	154149000	2.54872e-07	5.36917e-06	-0.311087	chr1	154048108	154117951	uc007das.1_AK154552	-	-30051	chr1	154201186	154205674	uc029qug.1_Zfp648	+	52187
chr1	154200001	154201000	1.0549e-05	0.00010428	0.570542	chr1	154048108	154117951	uc007das.1_AK154552	-	-82051	chr1	154201186	154205674	uc029qug.1_Zfp648	+	187
chr1	154283001	154284000	1.03868e-06	1.62779e-05	-0.391399	chr1	154255688	154270416	uc007dau.1_4930532M18Rik	+	-12586	chr1	154392518	154725920	uc007dav.1_Cacna1e	-	108519
chr1	154427001	154428000	1.22567e-05	0.000117657	0.262675	chr1	154392518	154725920	uc007dav.1_Cacna1e	-	0	chr1	155063522	155083264	uc007daw.1_AK029591	-	635523
chr1	154535001	154536000	7.42066e-05	0.000505285	0.271021	chr1	154392518	154725920	uc007dav.1_Cacna1e	-	0	chr1	155063522	155083264	uc007daw.1_AK029591	-	527523
chr1	154725001	154726000	8.00373e-09	3.63378e-07	-0.41064	chr1	154392518	154725920	uc007dav.1_Cacna1e	-	0	chr1	155063522	155083264	uc007daw.1_AK029591	-	337523
chr1	154726001	154727000	6.88027e-09	3.25055e-07	0.374163	chr1	154392518	154725920	uc007dav.1_Cacna1e	-	-82	chr1	155063522	155083264	uc007daw.1_AK029591	-	336523
chr1	155245001	155246000	0.00283333	0.0100039	0.284886	chr1	155212470	155232740	uc007dbe.1_BC034090	-	-12262	chr1	155275656	155417444	uc007dbf.1_Xpr1	-	29657
chr1	155283001	155284000	1.41141e-08	5.58999e-07	-0.493728	chr1	155282182	155417444	uc007dbh.1_Xpr1	-	0	chr1	155520172	155527108	uc007dbi.1_AK147021	-	236173
chr1	155442001	155443000	2.36393e-06	3.14449e-05	0.321118	chr1	155282182	155417444	uc007dbh.1_Xpr1	-	-24558	chr1	155520172	155527108	uc007dbi.1_AK147021	-	77173
chr1	155562001	155563000	1.54843e-09	1.03606e-07	0.40511	chr1	155558119	155687233	uc011wtw.1_Acbd6	+	0	chr1	155701693	155742027	uc007dbn.2_Lhx4	-	138694
chr1	155724001	155725000	0.000471841	0.00229647	0.253386	chr1	155701693	155742027	uc007dbn.2_Lhx4	-	0	chr1	155778154	155812899	uc007dbo.1_Qsox1	-	53155
chr1	155790001	155791000	0.000257603	0.00139571	0.257522	chr1	155778154	155812899	uc011wtx.1_Qsox1	-	0	chr1	155801446	155812899	uc007dbq.1_Qsox1	-	10447
chr1	156111001	156112000	8.32134e-10	6.42737e-08	0.631549	chr1	156075955	156205026	uc033fmn.1_Fam163a	-	0	chr1	156255295	156301906	uc007dcf.3_Tdrd5	-	143296
chr1	156204001	156205000	4.74869e-09	2.43929e-07	0.270694	chr1	156075955	156205026	uc033fmn.1_Fam163a	-	0	chr1	156255295	156301906	uc007dcf.3_Tdrd5	-	50296
chr1	156264001	156265000	1.16493e-06	1.78621e-05	0.257751	chr1	156255295	156303606	uc029quj.1_Tdrd5	-	0	chr1	156310734	156328035	uc007dch.1_Nphs2	+	45735
chr1	156277001	156278000	3.62153e-12	8.75326e-10	-0.646592	chr1	156255295	156303606	uc029quj.1_Tdrd5	-	0	chr1	156310734	156328035	uc007dch.1_Nphs2	+	32735
chr1	156640001	156641000	0.00494291	0.0157956	0.274765	chr1	156558786	156649619	uc011wug.1_Abl2	+	0	chr1	156653616	156674339	uc007dcn.2_Tor3a	-	12617
chr1	156705001	156706000	0.0123458	0.033444	0.27812	chr1	156701641	156718910	uc007dcr.1_Fam20b	-	0	chr1	156804165	156813568	uc007dcs.2_Ralgps2	-	98166
chr1	157120001	157121000	5.71768e-07	1.01704e-05	-0.276933	chr1	157099147	157108645	uc007ddf.1_Tex35	-	-11357	chr1	157135182	157412595	uc007ddg.2_Rasal2	-	14183
chr1	157261001	157262000	0.00118499	0.00488908	0.29966	chr1	157135182	157412595	uc007ddg.2_Rasal2	-	0	chr1	157284983	157412595	uc007ddh.2_Rasal2	-	22984
chr1	157443001	157444000	0.000140279	0.000848946	0.29176	chr1	157412351	157420236	uc007ddi.1_2810025M15Rik	+	-22766	chr1	157458581	157488733	uc007ddj.1_BC026585	+	14582
chr1	157825001	157826000	0.00236866	0.00864097	0.331215	chr1	157526169	157568424	uc007ddn.2_Sec16b	+	-256578	chr1	158245268	158356229	uc007ddp.2_Brinp2	-	419269
chr1	158206001	158207000	0.0134145	0.0358172	-0.301966	chr1	157526169	157568424	uc007ddn.2_Sec16b	+	-637578	chr1	158245268	158356229	uc007ddp.2_Brinp2	-	38269
chr1	158249001	158250000	0.00217183	0.00804957	-0.305051	chr1	158245268	158356260	uc007ddq.2_Brinp2	-	0	chr1	158362303	158610171	uc007ddr.3_Astn1	+	112304
chr1	158296001	158297000	2.97679e-06	3.77145e-05	0.323572	chr1	158245268	158356260	uc007ddq.2_Brinp2	-	0	chr1	158362303	158610171	uc007ddr.3_Astn1	+	65304
chr1	158356001	158357000	0.000192205	0.00109836	0.253141	chr1	158245268	158356260	uc007ddq.2_Brinp2	-	0	chr1	158362303	158610171	uc007ddr.3_Astn1	+	5304
chr1	158481001	158482000	0.00455967	0.0147877	0.251269	chr1	158362303	158691786	uc007ddu.3_Astn1	+	0	chr1	158505624	158505733	uc011wuk.1_Mir488	+	23625
chr1	159150001	159151000	1.61568e-06	2.31472e-05	0.48206	chr1	159135396	159166387	uc007ddy.1_AK016192	+	0	chr1	159232325	159347580	uc007ddz.1_Rfwd2	+	81326
chr1	159551001	159552000	5.43067e-06	6.12436e-05	-0.381017	chr1	159523768	159924922	uc007dea.2_Tnr	+	0	chr1	160044379	160072782	uc007deb.2_4930523C07Rik	+	492380
chr1	159585001	159586000	0.000168595	0.000986708	-0.27603	chr1	159523768	159924922	uc007dea.2_Tnr	+	0	chr1	160044379	160072782	uc007deb.2_4930523C07Rik	+	458380
chr1	159655001	159656000	1.33091e-06	1.98741e-05	-0.373837	chr1	159523768	159924922	uc007dea.2_Tnr	+	0	chr1	160044379	160072782	uc007deb.2_4930523C07Rik	+	388380
chr1	159670001	159671000	0.00104641	0.00441229	0.315782	chr1	159523768	159924922	uc007dea.2_Tnr	+	0	chr1	160044379	160072782	uc007deb.2_4930523C07Rik	+	373380
chr1	159800001	159801000	4.67434e-05	0.000345879	0.288788	chr1	159523768	159924922	uc007dea.2_Tnr	+	0	chr1	160044379	160072782	uc007deb.2_4930523C07Rik	+	243380
chr1	160183001	160184000	0.00419383	0.0138009	-0.265196	chr1	160085031	160153575	uc007dee.2_Tnn	-	-29427	chr1	160195259	160201186	uc007def.1_Mrps14	+	11260
chr1	160377001	160378000	9.31403e-05	0.000607601	0.391898	chr1	160256571	160792938	uc007dej.2_Rabgap1l	-	0	chr1	160576667	160577753	uc011wum.1_Gpr52	-	198668
chr1	161186001	161187000	0.000449044	0.00220412	-0.30325	chr1	161142711	161170507	uc007dfj.2_Ankrd45	+	-15495	chr1	161240111	161251166	uc007dfl.1_Prdx6	-	53112
chr1	161323001	161324000	0.000905269	0.003916	0.290552	chr1	161240111	161251166	uc007dfm.1_Prdx6	-	-71836	chr1	161395437	161418206	uc007dfn.2_Tnfsf4	+	71438
chr1	161471001	161472000	0.000233144	0.00128533	0.312323	chr1	161395437	161418206	uc007dfn.2_Tnfsf4	+	-52796	chr1	161494656	161505290	uc007dfo.2_Tnfsf18	+	22657
chr1	161906001	161907000	0.00414403	0.013666	0.258039	chr1	161890447	161900913	uc007dfv.1_AK135878	+	-5089	chr1	161942088	161969148	uc007dfw.2_4930558K02Rik	-	35089
chr1	161907001	161908000	2.5916e-08	8.99967e-07	-0.485081	chr1	161890447	161900913	uc007dfv.1_AK135878	+	-6089	chr1	161942088	161969148	uc007dfw.2_4930558K02Rik	-	34089
chr1	162109001	162110000	2.33956e-05	0.000197541	-0.316879	chr1	162016452	162134752	uc007dge.1_Dnm3	-	0	chr1	162217622	162225550	uc007dgf.1_Dnm3os	+	107623
chr1	162203001	162204000	8.64807e-09	3.85417e-07	0.252669	chr1	162006139	162295638	uc007dgd.1_Dnm3	-	0	chr1	162217622	162225550	uc007dgf.1_Dnm3os	+	13623
chr1	162243001	162244000	4.70098e-07	8.72725e-06	-0.256602	chr1	162006139	162295638	uc007dgd.1_Dnm3	-	0	chr1	162318170	162478034	uc007dgg.2_Dnm3	-	74171
chr1	162404001	162405000	0.00523349	0.0165443	0.295863	chr1	162318170	162478034	uc007dgg.2_Dnm3	-	0	chr1	162533671	162548345	uc007dgh.1_Mettl13	-	128672
chr1	162447001	162448000	3.27555e-06	4.07195e-05	0.438862	chr1	162318170	162478034	uc007dgg.2_Dnm3	-	0	chr1	162533671	162548345	uc007dgh.1_Mettl13	-	85672
chr1	162938001	162939000	0.0173678	0.0441576	0.261302	chr1	162916550	162937515	uc007dhd.1_Fmo6	-	-487	chr1	162941053	162941074	uc029qun.1_JA187517	-	2054
chr1	163506001	163507000	8.20573e-09	3.70531e-07	0.366094	chr1	163384908	163403641	uc007dhn.1_Gorab	-	-102361	chr1	163702992	163725232	uc011wus.1_Mettl11b	-	195993
chr1	164012001	164013000	0.000302501	0.00159201	0.265149	chr1	163994944	163997244	uc007dhw.2_Mettl18	+	-14758	chr1	164048233	164057677	uc007dhx.1_Sele	+	35234
chr1	164140001	164141000	3.46605e-08	1.12918e-06	0.44732	chr1	164115263	164150026	uc007dhz.2_Selp	+	0	chr1	164144704	164150026	uc033fms.1_Selp	+	3705
chr1	164144001	164145000	8.52789e-05	0.000565328	0.446582	chr1	164115263	164150026	uc007dhz.2_Selp	+	0	chr1	164144704	164150026	uc033fms.1_Selp	+	0
chr1	164159001	164160000	1.02326e-09	7.55843e-08	0.467464	chr1	164151858	164220274	uc007dic.1_F5	+	0	chr1	164249045	164265385	uc007did.2_Slc19a2	+	89046
chr1	164227001	164228000	9.15146e-06	9.29724e-05	0.333757	chr1	164151858	164220274	uc007dic.1_F5	+	-6728	chr1	164249045	164265385	uc007did.2_Slc19a2	+	21046
chr1	164275001	164276000	0.00137073	0.00551145	0.304331	chr1	164249045	164265385	uc007die.2_Slc19a2	+	-9617	chr1	164275597	164287847	uc007dif.2_Ccdc181	+	0
chr1	165089001	165090000	4.4328e-05	0.000331314	-0.302152	chr1	165066616	165091930	uc007div.2_4930568G15Rik	-	0	chr1	165137852	165160773	uc007diw.1_Tbx19	-	47853
chr1	165129001	165130000	2.87281e-30	3.54894e-27	-0.366839	chr1	165066616	165091930	uc007div.2_4930568G15Rik	-	-37072	chr1	165137852	165160773	uc007diw.1_Tbx19	-	7853
chr1	165135001	165136000	5.25856e-07	9.53247e-06	-0.278382	chr1	165066616	165091930	uc007div.2_4930568G15Rik	-	-43072	chr1	165137852	165160773	uc007diw.1_Tbx19	-	1853
chr1	165316001	165317000	1.35843e-05	0.000127855	0.310097	chr1	165302622	165321851	uc011wuy.1_Gpr161	+	0	chr1	165329500	165460463	uc007djb.2_Dcaf6	-	12501
chr1	165427001	165428000	7.8392e-05	0.000528176	0.420432	chr1	165329500	165460463	uc007djb.2_Dcaf6	-	0	chr1	165460636	165464651	uc007djc.1_AK008044	+	32637
chr1	165656001	165657000	1.0885e-05	0.000106948	-0.328782	chr1	165648944	165708094	uc007djk.1_Rcsd1	-	0	chr1	165704521	165709732	uc007djl.1_AK020768	-	47522
chr1	166000001	166001000	0.000178111	0.00103208	-0.254841	chr1	165931661	166002634	uc007dkg.1_Pou2f1	-	0	chr1	166098147	166127898	uc007dkh.2_Dusp27	-	97148
chr1	166004001	166005000	2.71089e-07	5.63956e-06	0.480257	chr1	165931661	166002634	uc007dkg.1_Pou2f1	-	-1368	chr1	166098147	166127898	uc007dkh.2_Dusp27	-	93148
chr1	166159001	166160000	9.7844e-10	7.31757e-08	0.555989	chr1	166130459	166166510	uc007dkj.1_Gpa33	+	0	chr1	166201384	166238744	uc007dkk.1_Mael	-	41385
chr1	166183001	166184000	1.20935e-06	1.84174e-05	0.283716	chr1	166130459	166166510	uc007dkj.1_Gpa33	+	-16492	chr1	166201384	166238744	uc007dkk.1_Mael	-	17385
chr1	166254001	166255000	2.16775e-11	3.7399e-09	0.430942	chr1	166201384	166238744	uc007dkk.1_Mael	-	-15258	chr1	166254138	166316832	uc011wvj.1_Ildr2	+	0
chr1	166309001	166310000	4.70615e-07	8.73315e-06	0.335832	chr1	166254138	166316832	uc011wvj.1_Ildr2	+	0	chr1	166379166	166384108	uc007dkl.2_Tada1	+	69167
chr1	166450001	166451000	9.52895e-09	4.14117e-07	-0.810162	chr1	166395396	166409828	uc007dko.2_Pogk	-	-40174	chr1	166483612	166497588	uc011wvl.1_Gm4846	-	32613
chr1	166509001	166510000	1.48061e-06	2.16254e-05	0.610606	chr1	166483612	166497588	uc011wvl.1_Gm4846	-	-11414	chr1	166628970	166647693	uc011wvm.1_Gm4847	-	118971
chr1	166856001	166857000	1.26544e-06	1.90917e-05	-0.532315	chr1	166662054	166681845	uc011wvn.1_Fmo9	-	-174157	chr1	166974022	166999730	uc007dkr.2_Gm16701	-	117023
chr1	166933001	166934000	1.66407e-10	1.87776e-08	0.506794	chr1	166662054	166681845	uc011wvn.1_Fmo9	-	-251157	chr1	166974022	166999730	uc007dkr.2_Gm16701	-	40023
chr1	167000001	167001000	6.61053e-09	3.14914e-07	0.362761	chr1	166974022	166999730	uc007dkr.2_Gm16701	-	-272	chr1	167001416	167091302	uc007dks.2_Fam78b	+	417
chr1	167001001	167002000	1.77468e-07	4.05761e-06	0.372021	chr1	166974022	166999730	uc007dkr.2_Gm16701	-	-1272	chr1	167001416	167091302	uc011wvo.1_Fam78b	+	0
chr1	167340001	167341000	4.4976e-06	5.24838e-05	0.323391	chr1	167308669	167333978	uc007dkv.1_Tmco1	+	-6024	chr1	167349990	167368530	uc007dkx.1_Aldh9a1	+	8991
chr1	167433001	167434000	0.00667176	0.020186	-0.312532	chr1	167372383	167393797	uc007dky.1_Mgst3	-	-39205	chr1	167445674	167466780	uc007dkz.1_Lrrc52	-	11675
chr1	167516001	167517000	2.39935e-06	3.1839e-05	0.476555	chr1	167445674	167466780	uc007dkz.1_Lrrc52	-	-49222	chr1	167598361	167639623	uc007dla.2_Rxrg	+	81362
chr1	167638001	167639000	2.05251e-07	4.53282e-06	-0.29821	chr1	167618264	167639623	uc007dlb.2_Rxrg	+	0	chr1	167689557	167848733	uc007dlc.1_Lmx1a	+	50558
chr1	167649001	167650000	1.61433e-15	8.70818e-13	-0.579527	chr1	167618264	167639623	uc007dlb.2_Rxrg	+	-9379	chr1	167689557	167848733	uc007dlc.1_Lmx1a	+	39558
chr1	167802001	167803000	1.12015e-07	2.8294e-06	-0.457776	chr1	167689557	167848733	uc007dlc.1_Lmx1a	+	0	chr1	168119363	168432258	uc007dld.1_Pbx1	-	316364
chr1	167969001	167970000	7.75933e-05	0.000523836	-0.389366	chr1	167689557	167848733	uc007dlc.1_Lmx1a	+	-120269	chr1	168119363	168432258	uc007dld.1_Pbx1	-	149364
chr1	168003001	168004000	1.02961e-08	4.39533e-07	-0.283585	chr1	167689557	167848733	uc007dlc.1_Lmx1a	+	-154269	chr1	168119363	168432258	uc007dld.1_Pbx1	-	115364
chr1	168260001	168261000	0.000562561	0.00265178	-0.302927	chr1	168208342	168432258	uc007dlg.1_Pbx1	-	0	chr1	168335990	168337319	uc007dlh.1_BC039791	-	74991
chr1	168384001	168385000	3.71802e-06	4.50766e-05	0.564108	chr1	168208342	168432258	uc007dlg.1_Pbx1	-	0	chr1	168424441	168432258	uc007dli.1_Pbx1	-	39442
chr1	169806001	169807000	7.54241e-08	2.07342e-06	0.359156	chr1	169741476	169747642	uc007dln.1_Rgs4	-	-58360	chr1	169928938	169934653	uc007dlo.1_1700084C01Rik	+	121939
chr1	170255001	170256000	8.40042e-11	1.10457e-08	-0.495235	chr1	170232870	170251587	uc007dmb.1_Sh2d1b2	+	-3415	chr1	170277323	170285662	uc007dmc.1_Sh2d1b1	+	21324
chr1	170395001	170396000	0.000341593	0.00175883	0.325772	chr1	170372667	170589849	uc007dmh.1_Nos1ap	-	0	chr1	170644531	170682789	uc007dmi.2_Olfml2b	+	248532
chr1	171128001	171129000	7.76293e-06	8.13404e-05	-0.293439	chr1	171121660	171126967	uc007dna.1_1700009P17Rik	+	-1035	chr1	171129156	171150603	uc007dnb.2_Sdhc	-	157
chr1	171133001	171134000	5.16215e-11	7.50276e-09	-0.273078	chr1	171129156	171150603	uc007dnb.2_Sdhc	-	0	chr1	171150712	171161123	uc007dnc.1_Mpz	+	16713
chr1	171279001	171280000	2.77091e-08	9.47932e-07	0.302407	chr1	171276991	171281186	uc007dns.1_Ppox	-	0	chr1	171281952	171287961	uc011wwa.1_Usp21	-	1953
chr1	171419001	171420000	2.15967e-08	7.796e-07	0.405836	chr1	171411327	171418757	uc007dok.1_Usf1	+	-245	chr1	171419032	171420352	uc011wwd.1_Tstd1	+	0
chr1	171439001	171440000	2.11515e-05	0.00018223	-0.287603	chr1	171437560	171464593	uc007doo.1_F11r	+	0	chr1	171503477	171504750	uc007dop.1_Alyref2	+	63478
chr1	171550001	171551000	2.30097e-08	8.17772e-07	0.335002	chr1	171518123	171535294	uc007doq.2_Itln1	-	-14708	chr1	171559192	171578250	uc007dor.1_Cd244	+	8193
chr1	171606001	171607000	0.00284915	0.0100491	-0.257747	chr1	171588612	171607410	uc011wwg.2_Ly9	-	0	chr1	171632402	171648999	uc007dov.1_Slamf7	-	25403
chr1	171645001	171646000	4.73236e-08	1.43542e-06	0.292439	chr1	171636228	171649007	uc007doy.1_Slamf7	-	0	chr1	171669438	171669511	uc033fny.1_TRNA-His	+	23439
chr1	171885001	171886000	1.90068e-13	6.85369e-11	0.689224	chr1	171839696	171890718	uc007dpf.3_Cd84	+	0	chr1	171917536	171943868	uc007dpg.1_Slamf6	+	31537
chr1	172053001	172054000	0.000193186	0.00110274	0.261712	chr1	172052291	172057596	uc007dpj.2_Nhlh1	-	0	chr1	172053895	172054297	uc033fnz.1_Nhlh1	-	0
chr1	172061001	172062000	0.00243727	0.0088394	0.289201	chr1	172052291	172057596	uc007dpj.2_Nhlh1	-	-3406	chr1	172066012	172082749	uc007dpk.2_Ncstn	-	4013
chr1	172078001	172079000	4.25901e-07	8.06459e-06	-0.257645	chr1	172066012	172082749	uc007dpk.2_Ncstn	-	0	chr1	172082528	172093560	uc007dpl.2_Copa	+	3529
chr1	172146001	172147000	3.83805e-08	1.22159e-06	-0.590792	chr1	172126754	172136497	uc011wwj.1_Pex19	+	-9505	chr1	172148014	172173430	uc007dpr.2_Dcaf8	+	1015
chr1	172154001	172155000	1.35992e-05	0.000127942	0.281038	chr1	172148177	172196393	uc007dpx.2_Dcaf8	+	0	chr1	172196728	172206781	uc007dpy.1_Pea15a	-	41729
chr1	172193001	172194000	5.84864e-06	6.49471e-05	-0.266951	chr1	172148177	172196393	uc007dpx.2_Dcaf8	+	0	chr1	172196728	172206781	uc007dpy.1_Pea15a	-	2729
chr1	172205001	172206000	6.58884e-08	1.86061e-06	0.274394	chr1	172196728	172206781	uc007dpy.1_Pea15a	-	0	chr1	172209893	172213955	uc007dpz.2_Casq1	-	3894
chr1	172271001	172272000	2.46673e-07	5.23336e-06	-0.26278	chr1	172261631	172319835	uc007dqb.1_Igsf8	+	0	chr1	172271708	172298064	uc011wwl.1_Atp1a2	-	0
chr1	172277001	172278000	0.00109292	0.00457106	0.252444	chr1	172271708	172298064	uc011wwl.1_Atp1a2	-	0	chr1	172284308	172298064	uc007dqd.1_Atp1a2	-	6309
chr1	172293001	172294000	0.00286795	0.0101033	0.260005	chr1	172284308	172298064	uc007dqd.1_Atp1a2	-	0	chr1	172312406	172319835	uc007dqe.1_Igsf8	+	18407
chr1	172353001	172354000	4.51625e-07	8.44935e-06	-0.250391	chr1	172341209	172374085	uc007dqj.1_Kcnj10	+	0	chr1	172368920	172370060	uc033foa.1_Kcnj10	+	14921
chr1	172364001	172365000	9.63323e-08	2.5096e-06	0.347856	chr1	172341209	172374085	uc007dqj.1_Kcnj10	+	0	chr1	172368920	172370060	uc033foa.1_Kcnj10	+	3921
chr1	172378001	172379000	3.17235e-05	0.000252506	-0.260989	chr1	172376530	172384099	uc007dqk.2_Pigm	+	0	chr1	172475359	172478409	uc007dql.2_Slamf9	+	96360
chr1	172431001	172432000	1.35353e-07	3.28377e-06	-0.379965	chr1	172376530	172384099	uc007dqk.2_Pigm	+	-46903	chr1	172475359	172478409	uc007dql.2_Slamf9	+	43360
chr1	172455001	172456000	2.73431e-08	9.37489e-07	0.36048	chr1	172376530	172384099	uc007dqk.2_Pigm	+	-70903	chr1	172475359	172478409	uc007dql.2_Slamf9	+	19360
chr1	172550001	172551000	1.75759e-05	0.000157063	0.352286	chr1	172541619	172550806	uc007dqr.1_4933439K11Rik	-	0	chr1	172555937	172563717	uc007dqs.2_Vsig8	+	4938
chr1	172562001	172563000	0.000919754	0.00396794	0.288147	chr1	172559905	172563717	uc007dqt.2_Vsig8	+	0	chr1	172581376	172590568	uc007dqu.1_Slamf8	-	18377
chr1	172782001	172783000	0.000433707	0.00214155	-0.338628	chr1	172698055	172699966	uc011wwq.1_Crp	+	-82036	chr1	172893960	172895054	uc007dqy.2_Apcs	-	110961
chr1	172898001	172899000	0.000163612	0.000962586	0.263462	chr1	172893960	172895054	uc007dqy.2_Apcs	-	-2948	chr1	172956767	172957817	uc007dqz.2_Olfr16	+	57768
chr1	173431001	173432000	0.00110011	0.00459543	0.289468	chr1	173420603	173466036	uc011wws.1_Aim2	+	0	chr1	173455333	173462320	uc033foc.1_Aim2	+	23334
chr1	173878001	173879000	9.25696e-06	9.38537e-05	0.533706	chr1	173857219	173880187	uc007drz.2_Mndal	-	0	chr1	173896354	173913127	uc007dsa.1_Mnda	-	17355
chr1	174018001	174019000	5.43833e-07	9.77336e-06	0.303605	chr1	174011997	174031755	uc007dsm.2_Ifi205	-	0	chr1	174041932	174042936	uc007dsn.2_Olfr433	+	22933
chr1	174061001	174062000	8.10107e-07	1.3391e-05	-0.257499	chr1	174050374	174051313	uc007dso.1_Olfr432	+	-9689	chr1	174069299	174070253	uc007dsp.1_Olfr430	+	7300
chr1	174369001	174370000	5.28762e-06	5.98971e-05	-0.296087	chr1	174368918	174369848	uc007dsz.1_Olfr417	+	0	chr1	174391045	174392055	uc007dta.2_Olfr248	+	21046
chr1	174654001	174655000	1.67734e-05	0.00015142	-0.360465	chr1	174612506	174700408	uc007dte.1_Fmn2	+	0	chr1	174833784	174921819	uc007dtf.1_Grem2	-	178785
chr1	175169001	175170000	1.46535e-13	5.50202e-11	0.454842	chr1	175059075	175492545	uc007dtl.2_Rgs7	-	0	chr1	175574308	175578415	uc007dtm.1_AK136128	+	404309
chr1	175647001	175648000	1.14406e-07	2.87637e-06	0.346277	chr1	175632192	175660853	uc011wxd.1_Kmo	+	0	chr1	175662420	175692632	uc007dtq.2_Opn3	-	14421
chr1	175667001	175668000	3.82955e-05	0.000294021	0.270737	chr1	175662420	175692632	uc007dtq.2_Opn3	-	0	chr1	175682237	175688353	uc007dtr.2_Chml	-	14238
chr1	176455001	176456000	1.37294e-06	2.03543e-05	0.340229	chr1	176430110	176527269	uc007dua.1_AK158658	-	0	chr1	176733652	176750511	uc007dub.1_Cep170	-	277653
chr1	176940001	176941000	4.38569e-06	5.13965e-05	0.477324	chr1	176814659	177020432	uc007duj.2_Sdccag8	+	0	chr1	177022114	177248767	uc007duk.2_Akt3	-	81115
chr1	177294001	177295000	4.25928e-05	0.000320849	-0.333914	chr1	177022114	177248767	uc007duk.2_Akt3	-	-45235	chr1	177442406	177450764	uc007dul.2_Zbtb18	+	147407
chr1	177295001	177296000	1.49811e-06	2.18093e-05	0.297631	chr1	177022114	177248767	uc007duk.2_Akt3	-	-46235	chr1	177442406	177450764	uc007dul.2_Zbtb18	+	146407
chr1	177322001	177323000	4.74066e-05	0.000350166	0.335626	chr1	177022114	177248767	uc007duk.2_Akt3	-	-73235	chr1	177442406	177450764	uc007dul.2_Zbtb18	+	119407
chr1	177360001	177361000	8.60616e-06	8.85155e-05	0.423601	chr1	177022114	177248767	uc007duk.2_Akt3	-	-111235	chr1	177442406	177450764	uc007dul.2_Zbtb18	+	81407
chr1	177463001	177464000	1.77219e-07	4.05424e-06	0.335542	chr1	177458965	177461203	uc007duo.1_AK082514	+	-1799	chr1	177467377	177476267	uc007dup.1_AK156859	+	3378
chr1	177572001	177573000	0.00094912	0.00407224	0.259417	chr1	177467377	177476267	uc007dup.1_AK156859	+	-95735	chr1	177641541	177642943	uc007duq.2_2310043L19Rik	-	68542
chr1	177623001	177624000	9.18072e-06	9.32081e-05	-0.30446	chr1	177467377	177476267	uc007dup.1_AK156859	+	-146735	chr1	177641541	177642943	uc007duq.2_2310043L19Rik	-	17542
chr1	178124001	178125000	3.00212e-07	6.1232e-06	-0.316379	chr1	177991434	178172704	uc007duw.2_Gm16432	+	0	chr1	178187416	178252597	uc007dux.1_Desi2	+	62417
chr1	178634001	178635000	7.61238e-06	8.00341e-05	0.281107	chr1	178529124	178932857	uc007dvh.2_Kif26b	+	0	chr1	178937109	178939199	uc007dvi.1_BC023483	+	302110
chr1	179552001	179553000	0.000414021	0.00206148	0.303596	chr1	179546528	179627473	uc007dvo.1_Cnst	+	0	chr1	179668230	179687184	uc007dvp.1_Sccpdh	+	115231
chr1	179613001	179614000	0.00839559	0.0243909	-0.285072	chr1	179546528	179627473	uc007dvo.1_Cnst	+	0	chr1	179668230	179687184	uc007dvp.1_Sccpdh	+	54231
chr1	179859001	179860000	1.01462e-09	7.51216e-08	-0.38071	chr1	179744903	179804015	uc011wxn.1_Ahctf1	-	-54987	chr1	179961088	180101272	uc007dvs.2_Cdc42bpa	+	101089
chr1	180280001	180281000	0.000173727	0.00101092	0.374254	chr1	180232523	180256300	uc007dwe.1_Psen2	-	-23702	chr1	180326968	180330549	uc007dwf.1_Gm5069	-	45969
chr1	180332001	180333000	6.91977e-08	1.93413e-06	0.366484	chr1	180330475	180423659	uc007dwg.1_Itpkb	+	0	chr1	180432372	180483504	uc007dwh.2_6330403A02Rik	-	99373
chr1	180354001	180355000	0.00861736	0.0249223	0.288254	chr1	180330475	180423659	uc007dwg.1_Itpkb	+	0	chr1	180432372	180483504	uc007dwh.2_6330403A02Rik	-	77373
chr1	180437001	180438000	3.37791e-05	0.000265656	-0.373819	chr1	180432372	180483504	uc007dwh.2_6330403A02Rik	-	0	chr1	180568974	180601254	uc007dwi.1_Parp1	+	130975
chr1	180463001	180464000	1.03614e-06	1.62471e-05	-0.435181	chr1	180432372	180483504	uc007dwh.2_6330403A02Rik	-	0	chr1	180568974	180601254	uc007dwi.1_Parp1	+	104975
chr1	180647001	180648000	1.09387e-08	4.6029e-07	-0.345397	chr1	180641333	180690687	uc011wxp.1_Lin9	+	0	chr1	180679501	180688867	uc007dwn.1_Lin9	+	31502
chr1	180694001	180695000	0.00361921	0.0122254	0.323784	chr1	180693047	180697034	uc007dwp.1_Mixl1	-	0	chr1	180726042	180754204	uc007dwq.2_Acbd3	+	31043
chr1	180705001	180706000	2.72701e-06	3.52105e-05	-0.316891	chr1	180693047	180697034	uc007dwp.1_Mixl1	-	-7968	chr1	180726042	180754204	uc007dwq.2_Acbd3	+	20043
chr1	180706001	180707000	0.000164361	0.000966196	-0.388349	chr1	180693047	180697034	uc007dwp.1_Mixl1	-	-8968	chr1	180726042	180754204	uc007dwq.2_Acbd3	+	19043
chr1	180911001	180912000	0.000203175	0.00114927	0.312271	chr1	180904273	180908088	uc007dwv.2_Pycr2	+	-2914	chr1	180935038	180938401	uc007dww.1_Lefty1	+	23039
chr1	180937001	180938000	0.000376416	0.00190543	0.300578	chr1	180935038	180938401	uc007dww.1_Lefty1	+	0	chr1	180942517	180975104	uc007dwx.1_Tmem63a	+	4518
chr1	180945001	180946000	5.08592e-07	9.28004e-06	0.453126	chr1	180944081	180975104	uc007dwy.1_Tmem63a	+	0	chr1	180989555	181017495	uc007dwz.1_Ephx1	-	43556
chr1	181134001	181135000	2.43356e-07	5.17779e-06	0.283658	chr1	181130737	181144157	uc007dxd.1_Nvl	-	0	chr1	181150930	181168994	uc007dxe.2_Cnih4	+	15931
chr1	181241001	181242000	0.000653024	0.00299789	0.355014	chr1	181198846	181211978	uc007dxg.2_Wdr26	-	-29024	chr1	181352627	181460641	uc007dxh.2_Cnih3	+	110628
chr1	181274001	181275000	0.000180866	0.00104485	0.260844	chr1	181198846	181211978	uc007dxg.2_Wdr26	-	-62024	chr1	181352627	181460641	uc007dxh.2_Cnih3	+	77628
chr1	181477001	181478000	1.12194e-08	4.69043e-07	-0.279588	chr1	181352627	181460641	uc011wxs.1_Cnih3	+	-16361	chr1	181509632	181511451	uc011wxt.1_Ccdc121	-	31633
chr1	181516001	181517000	7.09756e-07	1.20494e-05	-0.251928	chr1	181509632	181511451	uc011wxt.1_Ccdc121	-	-4551	chr1	181564583	181564605	uc029qux.1_AB341833	-	47584
chr1	181590001	181591000	2.0048e-05	0.000174564	0.285437	chr1	181564583	181564605	uc029qux.1_AB341833	-	-25397	chr1	181653378	181678008	uc007dxj.1_AK139544	+	62379
chr1	181769001	181770000	1.55457e-06	2.24485e-05	0.279303	chr1	181741035	181769674	uc007dxl.1_Dnah14	+	0	chr1	181813457	181815774	uc007dxm.1_AK133142	+	43458
chr1	181864001	181865000	0.000241855	0.00132438	-0.287514	chr1	181815314	181842401	uc007dxo.2_Lbr	-	-21601	chr1	181896385	182019980	uc007dxp.2_Enah	-	31386
chr1	181922001	181923000	1.98278e-06	2.72702e-05	-0.3922	chr1	181896385	182019980	uc007dxs.2_Enah	-	0	chr1	181956110	182019980	uc007dxt.1_Enah	-	33111
chr1	182223001	182224000	2.70698e-07	5.63435e-06	0.394721	chr1	182157177	182158098	uc011wxu.1_Vmn1r1	-	-64904	chr1	182275769	182282759	uc007dxw.1_Degs1	-	51770
chr1	182224001	182225000	3.31339e-06	4.11016e-05	0.255705	chr1	182157177	182158098	uc011wxu.1_Vmn1r1	-	-65904	chr1	182275769	182282759	uc007dxw.1_Degs1	-	50770
chr1	182256001	182257000	1.24686e-05	0.000119308	0.303462	chr1	182157177	182158098	uc011wxu.1_Vmn1r1	-	-97904	chr1	182275769	182282759	uc007dxw.1_Degs1	-	18770
chr1	182301001	182302000	0.000211559	0.00118655	0.430691	chr1	182300833	182303289	uc007dxz.2_1700047M11Rik	+	0	chr1	182313101	182318387	uc007dya.1_Fbxo28	-	11102
chr1	182365001	182366000	7.61364e-05	0.000515845	0.357222	chr1	182313101	182341606	uc007dyb.1_Fbxo28	-	-23396	chr1	182409166	182462436	uc007dyc.1_Trp53bp2	+	43167
chr1	182500001	182501000	0.00320968	0.0110847	0.274377	chr1	182467258	182517483	uc007dye.2_Capn2	-	0	chr1	182565006	182606526	uc007dyh.2_Capn8	+	64007
chr1	182550001	182551000	2.35734e-08	8.32781e-07	-0.313715	chr1	182467258	182517483	uc007dye.2_Capn2	-	-32519	chr1	182565006	182606526	uc007dyh.2_Capn8	+	14007
chr1	182609001	182610000	0.000355429	0.00181876	-0.333525	chr1	182565006	182632352	uc011wxv.1_Capn8	+	0	chr1	182747125	182749180	uc007dyj.1_4922505E12Rik	-	137126
chr1	182627001	182628000	1.62423e-08	6.22472e-07	0.293943	chr1	182565006	182632352	uc011wxv.1_Capn8	+	0	chr1	182747125	182749180	uc007dyj.1_4922505E12Rik	-	119126
chr1	182639001	182640000	1.18648e-09	8.45911e-08	0.425001	chr1	182565006	182632352	uc011wxv.1_Capn8	+	-6650	chr1	182747125	182749180	uc007dyj.1_4922505E12Rik	-	107126
chr1	182642001	182643000	5.92033e-06	6.5553e-05	0.371864	chr1	182565006	182632352	uc011wxv.1_Capn8	+	-9650	chr1	182747125	182749180	uc007dyj.1_4922505E12Rik	-	104126
chr1	182649001	182650000	2.74427e-06	3.53781e-05	0.403303	chr1	182565006	182632352	uc011wxv.1_Capn8	+	-16650	chr1	182747125	182749180	uc007dyj.1_4922505E12Rik	-	97126
chr1	182689001	182690000	1.15145e-10	1.40682e-08	0.331049	chr1	182565006	182632352	uc011wxv.1_Capn8	+	-56650	chr1	182747125	182749180	uc007dyj.1_4922505E12Rik	-	57126
chr1	182714001	182715000	0.004284	0.014045	0.522006	chr1	182565006	182632352	uc011wxv.1_Capn8	+	-81650	chr1	182747125	182749180	uc007dyj.1_4922505E12Rik	-	32126
chr1	182835001	182836000	2.14468e-07	4.6893e-06	0.479464	chr1	182764905	182895654	uc007dyk.1_Susd4	+	0	chr1	182954787	182976044	uc007dyl.1_Tlr5	+	118788
chr1	182866001	182867000	0.000237453	0.00130451	0.516129	chr1	182764905	182895654	uc007dyk.1_Susd4	+	0	chr1	182954787	182976044	uc007dyl.1_Tlr5	+	87788
chr1	182936001	182937000	2.97416e-05	0.000239696	-0.259287	chr1	182764905	182895654	uc007dyk.1_Susd4	+	-40348	chr1	182954787	182976044	uc007dyl.1_Tlr5	+	17788
chr1	183116001	183117000	6.27308e-10	5.18768e-08	0.612328	chr1	183096192	183147557	uc008ico.2_Disp1	-	0	chr1	183276341	183297008	uc008icq.1_Brox	-	159342
chr1	183211001	183212000	2.08689e-08	7.58529e-07	-0.516529	chr1	183086263	183221529	uc008icn.1_Disp1	-	0	chr1	183276341	183297008	uc008icq.1_Brox	-	64342
chr1	183439001	183440000	1.11853e-05	0.000109307	0.278453	chr1	183418502	183437053	uc012bop.1_Hhipl2	+	-1949	chr1	184033031	184033998	uc011wxw.1_1700056E22Rik	-	593032
chr1	183552001	183553000	0.000636832	0.00293666	0.304476	chr1	183418502	183437053	uc012bop.1_Hhipl2	+	-114949	chr1	184033031	184033998	uc011wxw.1_1700056E22Rik	-	480032
chr1	184209001	184210000	0.000267677	0.00143993	-0.38189	chr1	184034460	184075636	uc007dym.1_Dusp10	+	-133366	chr1	184527840	184557691	uc029qvb.1_1700112H15Rik	-	317841
chr1	184216001	184217000	7.17427e-05	0.000491551	0.32437	chr1	184034460	184075636	uc007dym.1_Dusp10	+	-140366	chr1	184527840	184557691	uc029qvb.1_1700112H15Rik	-	310841
chr1	184271001	184272000	0.000107634	0.000684301	0.350317	chr1	184034460	184075636	uc007dym.1_Dusp10	+	-195366	chr1	184527840	184557691	uc029qvb.1_1700112H15Rik	-	255841
chr1	184306001	184307000	0.000901658	0.00390367	-0.297355	chr1	184034460	184075636	uc007dym.1_Dusp10	+	-230366	chr1	184527840	184557691	uc029qvb.1_1700112H15Rik	-	220841
chr1	184764001	184765000	4.4629e-05	0.000333079	0.28048	chr1	184727144	184732493	uc007dyn.2_Hlx	-	-31509	chr1	184786766	184811313	uc007dyo.1_Marc1	-	21767
chr1	184782001	184783000	0.000238689	0.00131016	0.251711	chr1	184727144	184732493	uc007dyn.2_Hlx	-	-49509	chr1	184786766	184811313	uc007dyo.1_Marc1	-	3767
chr1	184903001	184904000	0.000975127	0.00416356	-0.32323	chr1	184896423	184999549	uc011wxy.1_Mark1	-	0	chr1	185204167	185286746	uc007dyu.2_Rab3gap2	+	300168
chr1	185045001	185046000	0.003672	0.0123659	0.303076	chr1	184896423	184999549	uc011wxy.1_Mark1	-	-45453	chr1	185204167	185286746	uc007dyu.2_Rab3gap2	+	158168
chr1	185361001	185362000	6.5054e-07	1.12408e-05	0.459118	chr1	185332158	185357769	uc007dzd.1_Bpnt1	+	-3233	chr1	185363094	185401668	uc007dze.1_Eprs	+	1095
chr1	185374001	185375000	5.98284e-05	0.000424095	0.3564	chr1	185367530	185374450	uc007dzh.1_Eprs	+	0	chr1	185429356	185441819	uc007dzi.2_9630028B13Rik	-	54357
chr1	185413001	185414000	1.47283e-09	1.00018e-07	0.285855	chr1	185363094	185428355	uc007dzg.1_Eprs	+	0	chr1	185429356	185441819	uc007dzi.2_9630028B13Rik	-	15357
chr1	185515001	185516000	2.27611e-08	8.11139e-07	0.486182	chr1	185497305	185498014	uc011wyd.1_5033404E19Rik	+	-16988	chr1	186087731	186117310	uc007dzm.2_Lyplal1	-	571732
chr1	185692001	185693000	0.000494053	0.0023844	0.258849	chr1	185497305	185498014	uc011wyd.1_5033404E19Rik	+	-193988	chr1	186087731	186117310	uc007dzm.2_Lyplal1	-	394732
chr1	185787001	185788000	0.000351717	0.00180246	-0.362896	chr1	185497305	185498014	uc011wyd.1_5033404E19Rik	+	-288988	chr1	186087731	186117310	uc007dzm.2_Lyplal1	-	299732
chr1	186466001	186467000	7.89913e-08	2.147e-06	0.453288	chr1	186087731	186117310	uc007dzm.2_Lyplal1	-	-348692	chr1	186511881	186558681	uc007dzn.1_AK042551	-	44882
chr1	186671001	186672000	0.000140578	0.000850447	0.310965	chr1	186623185	186705992	uc007dzp.2_Tgfb2	-	0	chr1	186721086	186749358	uc007dzq.2_Rrp15	-	49087
chr1	186833001	186834000	1.14582e-08	4.77232e-07	0.354153	chr1	186749395	186752921	uc007dzr.1_AK020767	+	-80081	chr1	186967415	186970627	uc007dzs.1_D1Pas1	+	133416
chr1	186903001	186904000	1.84795e-05	0.000163387	0.345578	chr1	186749395	186752921	uc007dzr.1_AK020767	+	-150081	chr1	186967415	186970627	uc007dzs.1_D1Pas1	+	63416
chr1	187389001	187390000	0.000242581	0.00132744	0.353028	chr1	187215510	187351429	uc011wyf.1_Gpatch2	+	-37573	chr1	187609005	188214884	uc007eaa.2_Esrrg	+	219006
chr1	187408001	187409000	1.62896e-07	3.79865e-06	0.318611	chr1	187215510	187351429	uc011wyf.1_Gpatch2	+	-56573	chr1	187609005	188214884	uc007eaa.2_Esrrg	+	200006
chr1	187536001	187537000	8.84112e-06	9.03793e-05	0.279569	chr1	187215510	187351429	uc011wyf.1_Gpatch2	+	-184573	chr1	187609005	188214884	uc007eaa.2_Esrrg	+	72006
chr1	187645001	187646000	8.78616e-06	8.99646e-05	0.283737	chr1	187609005	188214884	uc007eaa.2_Esrrg	+	0	chr1	187997826	188214884	uc007eab.2_Esrrg	+	351827
chr1	187697001	187698000	9.03812e-05	0.000592538	-0.26196	chr1	187609005	188214884	uc007eaa.2_Esrrg	+	0	chr1	187997826	188214884	uc007eab.2_Esrrg	+	299827
chr1	187704001	187705000	3.41733e-06	4.21019e-05	0.277491	chr1	187609005	188214884	uc007eaa.2_Esrrg	+	0	chr1	187997826	188214884	uc007eab.2_Esrrg	+	292827
chr1	187705001	187706000	4.11887e-05	0.00031194	0.355242	chr1	187609005	188214884	uc007eaa.2_Esrrg	+	0	chr1	187997826	188214884	uc007eab.2_Esrrg	+	291827
chr1	187782001	187783000	1.60085e-08	6.15278e-07	0.446596	chr1	187609005	188214884	uc007eaa.2_Esrrg	+	0	chr1	187997826	188214884	uc007eab.2_Esrrg	+	214827
chr1	187811001	187812000	1.0997e-09	7.9768e-08	0.574139	chr1	187609005	188214884	uc007eaa.2_Esrrg	+	0	chr1	187997826	188214884	uc007eab.2_Esrrg	+	185827
chr1	187997001	187998000	1.06204e-11	2.08582e-09	0.439643	chr1	187609005	188214884	uc007eaa.2_Esrrg	+	0	chr1	187997826	188214884	uc011wyg.2_Esrrg	+	0
chr1	187998001	187999000	4.78408e-07	8.85278e-06	0.28883	chr1	187997826	188214884	uc011wyg.2_Esrrg	+	0	chr1	188006575	188008990	uc007eac.1_9330162B11Rik	-	7576
chr1	188004001	188005000	7.62429e-12	1.59773e-09	0.342893	chr1	187997826	188214884	uc011wyg.2_Esrrg	+	0	chr1	188006575	188008990	uc007eac.1_9330162B11Rik	-	1576
chr1	188050001	188051000	3.77682e-05	0.000290833	0.438104	chr1	187997826	188214884	uc011wyg.2_Esrrg	+	0	chr1	188262022	188357520	uc007ead.1_Ush2a	+	211023
chr1	188069001	188070000	5.9523e-09	2.91537e-07	0.328938	chr1	187997826	188214884	uc011wyg.2_Esrrg	+	0	chr1	188262022	188357520	uc007ead.1_Ush2a	+	192023
chr1	188420001	188421000	0.0153916	0.0400872	-0.321814	chr1	188262837	188965039	uc007eaf.1_Ush2a	+	0	chr1	188537697	188678687	uc007eag.1_Ush2a	+	116698
chr1	188454001	188455000	0.00030415	0.00159929	-0.443896	chr1	188262837	188965039	uc007eaf.1_Ush2a	+	0	chr1	188537697	188678687	uc007eag.1_Ush2a	+	82698
chr1	188630001	188631000	2.84115e-06	3.63458e-05	0.374998	chr1	188537697	188678687	uc007eag.1_Ush2a	+	0	chr1	188941405	188941479	uc033fok.1_TRNA-Asn	+	310406
chr1	188905001	188906000	0.00145919	0.0058075	0.293153	chr1	188262837	188965039	uc007eaf.1_Ush2a	+	0	chr1	188941405	188941479	uc033fok.1_TRNA-Asn	+	35406
chr1	188939001	188940000	0.000692309	0.00314594	0.260424	chr1	188262837	188965039	uc007eaf.1_Ush2a	+	0	chr1	188941405	188941479	uc033fok.1_TRNA-Asn	+	1406
chr1	189075001	189076000	0.000616262	0.002858	0.311064	chr1	188980798	189007840	uc007eaj.1_Kctd3	-	-67162	chr1	189207929	189343353	uc007eak.2_Kcnk2	-	131930
chr1	189189001	189190000	3.99475e-09	2.14041e-07	0.51991	chr1	188980798	189007840	uc007eaj.1_Kctd3	-	-181162	chr1	189207929	189343353	uc007eak.2_Kcnk2	-	17930
chr1	189575001	189576000	0.000475315	0.00231029	0.358035	chr1	189207929	189402273	uc007ean.2_Kcnk2	-	-172729	chr1	189640613	189688086	uc007eao.2_Cenpf	-	64614
chr1	189606001	189607000	6.24002e-09	3.01425e-07	0.591714	chr1	189207929	189402273	uc007ean.2_Kcnk2	-	-203729	chr1	189640613	189688086	uc007eao.2_Cenpf	-	33614
chr1	189985001	189986000	2.40226e-05	0.00020161	-0.327412	chr1	189880491	189922288	uc007eax.1_Smyd2	-	-62714	chr1	190118260	190121147	uc007eba.1_AK083547	-	132261
chr1	189989001	189990000	1.99626e-07	4.4375e-06	0.272018	chr1	189880491	189922288	uc007eax.1_Smyd2	-	-66714	chr1	190118260	190121147	uc007eba.1_AK083547	-	128261
chr1	190018001	190019000	8.38376e-06	8.66197e-05	0.280381	chr1	189880491	189922288	uc007eax.1_Smyd2	-	-95714	chr1	190118260	190121147	uc007eba.1_AK083547	-	99261
chr1	190155001	190156000	2.61704e-05	0.000216244	-0.311907	chr1	190121776	190170680	uc033fol.1_Prox1	-	0	chr1	190160521	190169399	uc007ebc.2_Prox1	-	4522
chr1	190175001	190176000	5.93282e-08	1.71207e-06	0.334721	chr1	190170295	190217276	uc007ebd.1_AK142161	+	0	chr1	190419332	190444845	uc007ebe.1_BC030469	-	243333
chr1	190181001	190182000	0.000808712	0.00357228	0.313278	chr1	190170295	190217276	uc007ebd.1_AK142161	+	0	chr1	190419332	190444845	uc007ebe.1_BC030469	-	237333
chr1	190232001	190233000	5.16521e-06	5.87532e-05	-0.277815	chr1	190170295	190217276	uc007ebd.1_AK142161	+	-14726	chr1	190419332	190444845	uc007ebe.1_BC030469	-	186333
chr1	190259001	190260000	4.85064e-09	2.48069e-07	0.368252	chr1	190170295	190217276	uc007ebd.1_AK142161	+	-41726	chr1	190419332	190444845	uc007ebe.1_BC030469	-	159333
chr1	190694001	190695000	5.59332e-05	0.000400924	0.304801	chr1	190419332	190444845	uc007ebe.1_BC030469	-	-249157	chr1	190772878	190834098	uc007ebf.1_Rps6kc1	-	77879
chr1	190742001	190743000	2.6958e-11	4.41636e-09	0.483527	chr1	190419332	190444845	uc007ebe.1_BC030469	-	-297157	chr1	190772878	190834098	uc007ebf.1_Rps6kc1	-	29879
chr1	190838001	190839000	1.31885e-07	3.21524e-06	0.315449	chr1	190798447	190911770	uc007ebh.2_Rps6kc1	-	0	chr1	190925107	190946491	uc007ebj.2_Angel2	+	86108
chr1	190991001	190992000	3.66766e-10	3.44117e-08	0.329116	chr1	190947645	190979296	uc007ebs.2_Vash2	-	-11706	chr1	191005831	191008455	uc007ebt.1_Mfsd7b	-	13832
chr1	190995001	190996000	2.0156e-08	7.38111e-07	0.327206	chr1	190947645	190979296	uc007ebs.2_Vash2	-	-15706	chr1	191005831	191008455	uc007ebt.1_Mfsd7b	-	9832
chr1	191184001	191185000	8.82049e-05	0.000580972	0.264358	chr1	191170296	191218039	uc011wyt.1_Atf3	-	0	chr1	191224473	191225686	uc007ecf.1_AK021325	+	39474
chr1	191186001	191187000	0.00848658	0.0246106	0.251351	chr1	191170296	191218039	uc011wyt.1_Atf3	-	0	chr1	191224473	191225686	uc007ecf.1_AK021325	+	37474
chr1	191407001	191408000	1.48114e-07	3.52291e-06	-0.306141	chr1	191351980	191397041	uc007eci.1_Ppp2r5a	-	-9961	chr1	191537364	191541562	uc007ecj.1_Dtl	-	129365
chr1	191650001	191651000	0.00229948	0.00843813	0.31136	chr1	191575733	191621691	uc007ecr.1_Ints7	+	-28311	chr1	191718023	191784257	uc007ecs.3_Lpgat1	+	67024
chr1	191837001	191838000	3.08895e-11	4.92878e-09	-0.285569	chr1	191827137	191833049	uc011wyv.1_Nek2	+	-3953	chr1	191890230	191899129	uc007ecz.1_AK076925	-	52231
chr1	191840001	191841000	0.0184916	0.0464822	0.261229	chr1	191827137	191833049	uc011wyv.1_Nek2	+	-6953	chr1	191890230	191899129	uc007ecz.1_AK076925	-	49231
chr1	191946001	191947000	9.68437e-07	1.54124e-05	0.310744	chr1	191906780	191913247	uc007edc.1_Slc30a1	+	-32755	chr1	191977372	191988282	uc007edd.2_Rd3	+	30373
chr1	192154001	192155000	3.39325e-08	1.11104e-06	-0.268124	chr1	192136897	192151025	uc007edm.1_Gm10516	+	-2977	chr1	192190871	192510158	uc007edn.1_Kcnh1	+	35872
chr1	192347001	192348000	1.40426e-05	0.000131231	-0.412956	chr1	192190871	192510158	uc007edo.1_Kcnh1	+	0	chr1	192512827	192771219	uc007edp.2_Hhat	-	164828
chr1	192477001	192478000	7.13722e-07	1.20996e-05	-0.562502	chr1	192190871	192510158	uc007edo.1_Kcnh1	+	0	chr1	192512827	192771219	uc007edp.2_Hhat	-	34828
chr1	192512001	192513000	0.00111986	0.00466324	0.344015	chr1	192190871	192510158	uc007edo.1_Kcnh1	+	-1844	chr1	192512827	192771219	uc007edp.2_Hhat	-	0
chr1	193131001	193132000	0.016635	0.0426572	-0.26623	chr1	193104402	193130251	uc011wyz.1_Diexf	-	-751	chr1	193153111	193166868	uc007edx.1_Irf6	+	21112
chr1	193147001	193148000	1.28647e-06	1.93259e-05	0.343078	chr1	193104402	193130251	uc011wyz.1_Diexf	-	-16751	chr1	193153111	193166868	uc007edx.1_Irf6	+	5112
chr1	193174001	193175000	2.42893e-07	5.17161e-06	-0.287648	chr1	193173576	193177832	uc011wzb.1_A130010J15Rik	+	0	chr1	193174341	193175133	uc033fom.1_A130010J15Rik	+	0
chr1	193384001	193385000	1.45369e-10	1.68164e-08	-0.660895	chr1	193346345	193370282	uc007eel.1_Camk1g	-	-13720	chr1	193507239	193509803	uc007eem.1_miR-205	-	122240
chr1	194096001	194097000	1.7511e-07	4.01978e-06	0.370004	chr1	193507239	193509803	uc007eem.1_miR-205	-	-586199	chr1	194212186	194222759	uc029qvi.1_4930503O07Rik	-	115187
chr1	194474001	194475000	1.97817e-07	4.40953e-06	0.292305	chr1	194212186	194222759	uc029qvi.1_4930503O07Rik	-	-251243	chr1	194619828	194816868	uc007een.1_Plxna2	+	144829
chr1	194912001	194913000	7.04515e-05	0.000484463	-0.640441	chr1	194804709	194816868	uc007eeo.1_Plxna2	+	-95134	chr1	194938820	194961292	uc007eep.2_Cd34	+	25821
chr10	3172001	3173000	1.86324e-07	4.21143e-06	-0.488775	chr10	3125090	3133193	uc029qvj.1_B020014A21Rik	-	-38809	chr10	3256207	3267771	uc011wzv.1_H60c	-	83208
chr10	3242001	3243000	9.8427e-07	1.5611e-05	0.274897	chr10	3125090	3133193	uc029qvj.1_B020014A21Rik	-	-108809	chr10	3256207	3267771	uc011wzv.1_H60c	-	13208
chr10	3366001	3367000	2.04507e-13	7.34787e-11	0.593323	chr10	3256207	3267771	uc029qvk.1_H60c	-	-98231	chr10	3366149	3464975	uc007ehr.1_Ppp1r14c	+	0
chr10	3367001	3368000	3.87094e-08	1.22985e-06	0.435999	chr10	3366149	3464975	uc007ehr.1_Ppp1r14c	+	0	chr10	3540278	3554877	uc007ehp.1_Iyd	+	172279
chr10	3740001	3741000	9.47697e-06	9.56337e-05	0.252982	chr10	3540278	3554877	uc007ehp.1_Iyd	+	-185125	chr10	3740664	3938579	uc007ehn.1_Plekhg1	+	0
chr10	3835001	3836000	3.4627e-09	1.91909e-07	0.290571	chr10	3740664	3938579	uc007ehn.1_Plekhg1	+	0	chr10	3872666	3967302	uc007ehl.2_Plekhg1	+	36667
chr10	3874001	3875000	1.29177e-08	5.22682e-07	-0.454385	chr10	3872666	3967302	uc007ehl.2_Plekhg1	+	0	chr10	3973074	4156130	uc007ehj.2_Mthfd1l	+	98075
chr10	4012001	4013000	4.15777e-05	0.000314339	0.289807	chr10	3973074	4167081	uc011wzu.1_Mthfd1l	+	0	chr10	4266328	4359471	uc007ehi.2_Akap12	+	253329
chr10	4028001	4029000	3.2221e-08	1.06602e-06	0.531636	chr10	3973074	4167081	uc011wzu.1_Mthfd1l	+	0	chr10	4266328	4359471	uc007ehi.2_Akap12	+	237329
chr10	4088001	4089000	3.55524e-06	4.34718e-05	0.291762	chr10	3973074	4167081	uc011wzu.1_Mthfd1l	+	0	chr10	4266328	4359471	uc007ehi.2_Akap12	+	177329
chr10	4188001	4189000	2.43567e-09	1.46336e-07	0.375613	chr10	3973074	4167081	uc011wzu.1_Mthfd1l	+	-20921	chr10	4266328	4359471	uc007ehi.2_Akap12	+	77329
chr10	4347001	4348000	9.78159e-08	2.54218e-06	0.366662	chr10	4266328	4359471	uc007ehi.2_Akap12	+	0	chr10	4347767	4359471	uc007ehh.1_Akap12	+	0
chr10	4362001	4363000	1.6022e-05	0.000145907	0.317453	chr10	4347767	4359471	uc007ehh.1_Akap12	+	-2531	chr10	4367073	4387462	uc007ehg.2_Zbtb2	-	4074
chr10	4376001	4377000	2.52342e-07	5.32877e-06	-0.332768	chr10	4367073	4388108	uc007ehf.2_Zbtb2	-	0	chr10	4403168	4429166	uc011wzt.1_Rmnd1	-	26169
chr10	4418001	4419000	5.31731e-11	7.64471e-09	-0.495866	chr10	4403168	4432352	uc007ehd.2_Rmnd1	-	0	chr10	4426093	4432352	uc007ehc.2_Rmnd1	-	7094
chr10	4490001	4491000	0.000220956	0.00122985	0.292688	chr10	4432604	4455140	uc007egz.1_1700052N19Rik	+	-34862	chr10	4509871	4561111	uc011wzs.1_Ccdc170	+	18872
chr10	4576001	4577000	0.000588941	0.0027535	0.364891	chr10	4509871	4561111	uc011wzs.1_Ccdc170	+	-14891	chr10	4612045	4857515	uc007egx.2_Esr1	+	35046
chr10	4636001	4637000	2.57642e-08	8.95473e-07	0.542595	chr10	4612045	5003761	uc007egw.1_Esr1	+	0	chr10	4710157	5003761	uc007egu.2_Esr1	+	73158
chr10	5203001	5204000	8.73826e-08	2.31994e-06	0.655782	chr10	5020195	5194707	uc007egq.2_Syne1	-	-8295	chr10	5324384	5367659	uc007egp.1_Syne1	-	120385
chr10	5481001	5482000	5.95206e-09	2.91537e-07	-0.29753	chr10	5360673	5551482	uc007egm.1_Syne1	-	0	chr10	5593727	5606791	uc007egl.2_Myct1	+	111728
chr10	5550001	5551000	1.10903e-07	2.8047e-06	0.444961	chr10	5360673	5551482	uc007egm.1_Syne1	-	0	chr10	5593727	5606791	uc007egl.2_Myct1	+	42728
chr10	5568001	5569000	1.77191e-08	6.67312e-07	0.491511	chr10	5360673	5551482	uc007egm.1_Syne1	-	-16520	chr10	5593727	5606791	uc007egl.2_Myct1	+	24728
chr10	5680001	5681000	6.48766e-05	0.000452959	0.320153	chr10	5639217	5647614	uc007egk.1_Vip	+	-32388	chr10	5799157	5805465	uc007egj.1_Fbxo5	-	118158
chr10	5681001	5682000	0.000415059	0.00206557	0.365571	chr10	5639217	5647614	uc007egk.1_Vip	+	-33388	chr10	5799157	5805465	uc007egj.1_Fbxo5	-	117158
chr10	6440001	6441000	7.47431e-07	1.2553e-05	-0.363784	chr10	5825663	5922400	uc007egh.2_Rgs17	-	-517602	chr10	6758592	6850107	uc007efy.1_Oprm1	+	317593
chr10	6979001	6980000	0.000171442	0.00100007	0.272117	chr10	6917553	6980465	uc007efs.1_Ipcef1	-	0	chr10	7119061	7135506	uc007efc.1_Cnksr3	-	139062
chr10	6980001	6981000	2.05594e-07	4.53795e-06	0.273476	chr10	6917553	6980465	uc007efs.1_Ipcef1	-	0	chr10	7119061	7135506	uc007efc.1_Cnksr3	-	138062
chr10	7024001	7025000	1.84986e-07	4.1874e-06	0.333551	chr10	6911542	7052479	uc007efd.1_Ipcef1	-	0	chr10	7119061	7135506	uc007efc.1_Cnksr3	-	94062
chr10	7093001	7094000	6.86062e-12	1.47226e-09	-0.393209	chr10	6911542	7052479	uc007efd.1_Ipcef1	-	-40523	chr10	7119061	7135506	uc007efc.1_Cnksr3	-	25062
chr10	7144001	7145000	3.02017e-06	3.81427e-05	-0.251765	chr10	7119061	7212237	uc007efb.1_Cnksr3	-	0	chr10	7444872	7473477	uc029qvm.1_Ulbp1	-	299873
chr10	7258001	7259000	7.21553e-05	0.000494091	-0.308542	chr10	7119061	7212237	uc007efb.1_Cnksr3	-	-45765	chr10	7444872	7473477	uc029qvm.1_Ulbp1	-	185873
chr10	7323001	7324000	4.03121e-08	1.27199e-06	-0.407967	chr10	7119061	7212237	uc007efb.1_Cnksr3	-	-110765	chr10	7444872	7473477	uc029qvm.1_Ulbp1	-	120873
chr10	7492001	7493000	2.15684e-06	2.9171e-05	0.338888	chr10	7446182	7473477	uc029qvp.1_Ulbp1	-	-18525	chr10	7589799	7608639	uc007ehv.2_Lrp11	+	96800
chr10	7709001	7710000	3.85649e-09	2.0848e-07	-0.289368	chr10	7691246	7716461	uc011wzy.1_Lats1	+	0	chr10	7725999	7763150	uc007eii.2_Katna1	+	16000
chr10	7847001	7848000	1.56246e-07	3.677e-06	-0.389711	chr10	7832469	7870397	uc007eiq.2_Zc3h12d	+	0	chr10	7905647	7956123	uc007eir.2_Tab2	-	57648
chr10	7848001	7849000	1.72313e-10	1.92975e-08	0.336302	chr10	7832469	7870397	uc007eiq.2_Zc3h12d	+	0	chr10	7905647	7956123	uc007eir.2_Tab2	-	56648
chr10	7888001	7889000	2.32403e-05	0.000196568	0.2726	chr10	7832469	7870397	uc007eiq.2_Zc3h12d	+	-17605	chr10	7905647	7956123	uc007eir.2_Tab2	-	16648
chr10	8191001	8192000	2.01535e-06	2.76445e-05	-0.361342	chr10	7905647	7956123	uc007eir.2_Tab2	-	-234879	chr10	8204752	8302242	uc011xaa.1_Ust	-	12753
chr10	8224001	8225000	2.14507e-06	2.90532e-05	0.276059	chr10	8204752	8518825	uc007eit.1_Ust	-	0	chr10	8722218	8886070	uc007eiu.1_Sash1	-	497219
chr10	8270001	8271000	0.00205758	0.0076952	0.324351	chr10	8204752	8518825	uc007eit.1_Ust	-	0	chr10	8722218	8886070	uc007eiu.1_Sash1	-	451219
chr10	8277001	8278000	7.37882e-06	7.80832e-05	0.294582	chr10	8204752	8518825	uc007eit.1_Ust	-	0	chr10	8722218	8886070	uc007eiu.1_Sash1	-	444219
chr10	8491001	8492000	0.000157118	0.000931555	0.361082	chr10	8204752	8518825	uc007eit.1_Ust	-	0	chr10	8722218	8886070	uc007eiu.1_Sash1	-	230219
chr10	8560001	8561000	8.72734e-09	3.88e-07	-0.381543	chr10	8204752	8518825	uc007eit.1_Ust	-	-41177	chr10	8722218	8886070	uc007eiu.1_Sash1	-	161219
chr10	8592001	8593000	6.16812e-09	2.9889e-07	0.508429	chr10	8204752	8518825	uc007eit.1_Ust	-	-73177	chr10	8722218	8886070	uc007eiu.1_Sash1	-	129219
chr10	8617001	8618000	0.00118506	0.00488926	-0.288485	chr10	8204752	8518825	uc007eit.1_Ust	-	-98177	chr10	8722218	8886070	uc007eiu.1_Sash1	-	104219
chr10	8625001	8626000	8.99498e-09	3.96683e-07	0.256286	chr10	8204752	8518825	uc007eit.1_Ust	-	-106177	chr10	8722218	8886070	uc007eiu.1_Sash1	-	96219
chr10	8728001	8729000	6.73564e-10	5.47676e-08	-0.422536	chr10	8722218	8886070	uc007eiu.1_Sash1	-	0	chr10	8813721	8886070	uc007eiv.1_Sash1	-	84722
chr10	8757001	8758000	1.69112e-07	3.91112e-06	0.467637	chr10	8722218	8886070	uc007eiu.1_Sash1	-	0	chr10	8813721	8886070	uc007eiv.1_Sash1	-	55722
chr10	8762001	8763000	5.2634e-07	9.53865e-06	0.342438	chr10	8722218	8886070	uc007eiu.1_Sash1	-	0	chr10	8813721	8886070	uc007eiv.1_Sash1	-	50722
chr10	9252001	9253000	0.000464598	0.002268	0.280627	chr10	8813721	8886070	uc007eiv.1_Sash1	-	-365932	chr10	9627258	9675208	uc007eiw.1_Samd5	-	374259
chr10	9434001	9435000	3.37266e-05	0.000265316	-0.41544	chr10	8813721	8886070	uc007eiv.1_Sash1	-	-547932	chr10	9627258	9675208	uc007eiw.1_Samd5	-	192259
chr10	9673001	9674000	5.61284e-07	1.00267e-05	-0.393415	chr10	9627258	9675208	uc007eiw.1_Samd5	-	0	chr10	9684721	9691909	uc007eix.2_Gm6150	+	10722
chr10	10057001	10058000	1.80948e-05	0.000160624	0.414045	chr10	9755546	9901040	uc007eiz.2_Stxbp5	-	-155962	chr10	10234993	10258699	uc007ejd.1_AK016412	+	176994
chr10	10718001	10719000	4.86002e-05	0.000357215	0.269449	chr10	10686058	11082331	uc007ejj.2_Grm1	-	0	chr10	10748929	10755650	uc007ejk.1_4930567K20Rik	+	29930
chr10	11050001	11051000	2.98156e-09	1.70923e-07	0.591467	chr10	10686058	11082331	uc007ejj.2_Grm1	-	0	chr10	11149429	11154526	uc007ejn.1_Shprh	+	98430
chr10	11326001	11327000	2.83905e-06	3.63249e-05	0.417651	chr10	11281586	11297969	uc011xad.1_Fbxo30	+	-28033	chr10	11343431	11345852	uc007eju.1_Epm2a	+	16432
chr10	11450001	11451000	0.00185045	0.00706217	-0.250018	chr10	11343444	11457477	uc007ejv.1_Epm2a	+	0	chr10	11693790	11693814	uc029qvs.1_AB350869	-	242791
chr10	11489001	11490000	3.87937e-06	4.66345e-05	0.375963	chr10	11343444	11457477	uc007ejv.1_Epm2a	+	-31525	chr10	11693790	11693814	uc029qvs.1_AB350869	-	203791
chr10	11690001	11691000	0.000191454	0.00109488	0.289216	chr10	11343444	11457477	uc007ejv.1_Epm2a	+	-232525	chr10	11693790	11693814	uc029qvs.1_AB350869	-	2791
chr10	11784001	11785000	0.0167887	0.0429775	-0.28134	chr10	11693790	11693814	uc029qvs.1_AB350869	-	-90188	chr10	12382187	12861735	uc007ejw.1_Utrn	-	597188
chr10	12376001	12377000	1.93168e-05	0.000169301	0.266572	chr10	11693790	11693814	uc029qvs.1_AB350869	-	-682188	chr10	12382187	12861735	uc007ejw.1_Utrn	-	5188
chr10	12466001	12467000	6.05821e-13	1.9438e-10	-0.764244	chr10	12385517	12614891	uc007ejx.1_Utrn	-	0	chr10	12501354	12614891	uc007ejy.1_Utrn	-	34355
chr10	12823001	12824000	0.000425227	0.00210701	-0.280622	chr10	12720818	12869365	uc007eke.1_Utrn	-	0	chr10	12916645	12923127	uc007ekf.2_B230208H11Rik	-	92646
chr10	13197001	13198000	2.27424e-05	0.000193183	0.276591	chr10	13178637	13193137	uc007ekp.1_Ltv1	-	-3865	chr10	13207716	13324160	uc007ekq.2_Phactr2	-	9717
chr10	13284001	13285000	3.18685e-10	3.09451e-08	0.34975	chr10	13207716	13474396	uc007eks.2_Phactr2	-	0	chr10	13501027	13513098	uc007eku.1_Fuca2	+	216028
chr10	13427001	13428000	1.43653e-05	0.000133704	0.262492	chr10	13207716	13474396	uc007eks.2_Phactr2	-	0	chr10	13501027	13513098	uc007eku.1_Fuca2	+	73028
chr10	13429001	13430000	0.00393631	0.0131004	0.273478	chr10	13207716	13474396	uc007eks.2_Phactr2	-	0	chr10	13501027	13513098	uc007eku.1_Fuca2	+	71028
chr10	13469001	13470000	1.08748e-07	2.76151e-06	-0.255554	chr10	13207716	13474396	uc007eks.2_Phactr2	-	0	chr10	13501027	13513098	uc007eku.1_Fuca2	+	31028
chr10	13500001	13501000	0.000255778	0.00138759	0.358984	chr10	13207716	13474396	uc007eks.2_Phactr2	-	-25606	chr10	13501027	13513098	uc007eku.1_Fuca2	+	28
chr10	13868001	13869000	5.1314e-08	1.53127e-06	0.546531	chr10	13826503	13868830	uc007ele.1_Aig1	-	0	chr10	13871279	13879208	uc007elf.1_AK075633	+	2280
chr10	13869001	13870000	1.07864e-09	7.85826e-08	0.368707	chr10	13826503	13868830	uc007ele.1_Aig1	-	-172	chr10	13871279	13879208	uc007elf.1_AK075633	+	1280
chr10	13901001	13902000	5.32519e-08	1.57674e-06	-0.340183	chr10	13871279	13879208	uc007elf.1_AK075633	+	-21794	chr10	13966076	14151378	uc007elg.1_Hivep2	+	64077
chr10	14269001	14270000	2.51382e-12	6.43333e-10	0.62926	chr10	13966378	14151378	uc007elj.1_Hivep2	+	-117624	chr10	14402584	14545036	uc007elk.1_Gpr126	-	132585
chr10	14289001	14290000	2.26592e-12	5.88164e-10	-0.41612	chr10	13966378	14151378	uc007elj.1_Hivep2	+	-137624	chr10	14402584	14545036	uc007elk.1_Gpr126	-	112585
chr10	14544001	14545000	1.01907e-08	4.35128e-07	0.320576	chr10	14402584	14545036	uc007elk.1_Gpr126	-	0	chr10	14655332	14705489	uc007ell.1_Vta1	-	110333
chr10	14570001	14571000	1.24991e-07	3.0817e-06	0.507649	chr10	14402584	14545036	uc007elk.1_Gpr126	-	-24966	chr10	14655332	14705489	uc007ell.1_Vta1	-	84333
chr10	14677001	14678000	1.70755e-08	6.46846e-07	-0.312439	chr10	14655332	14705489	uc007elm.1_Vta1	-	0	chr10	14705608	14759019	uc007eln.1_1700016L04Rik	+	27609
chr10	14893001	14894000	0.0186989	0.0468927	0.35339	chr10	14760288	14770556	uc011xam.1_Nmbr	+	-122446	chr10	15300391	15312376	uc007elq.1_AK035829	+	406392
chr10	14911001	14912000	3.88597e-07	7.49365e-06	0.467012	chr10	14760288	14770556	uc011xam.1_Nmbr	+	-140446	chr10	15300391	15312376	uc007elq.1_AK035829	+	388392
chr10	14931001	14932000	3.42595e-08	1.11866e-06	0.394949	chr10	14760288	14770556	uc011xam.1_Nmbr	+	-160446	chr10	15300391	15312376	uc007elq.1_AK035829	+	368392
chr10	14991001	14992000	0.00662832	0.0200762	0.326598	chr10	14760288	14770556	uc011xam.1_Nmbr	+	-220446	chr10	15300391	15312376	uc007elq.1_AK035829	+	308392
chr10	15004001	15005000	7.16747e-05	0.000491236	0.266329	chr10	14760288	14770556	uc011xam.1_Nmbr	+	-233446	chr10	15300391	15312376	uc007elq.1_AK035829	+	295392
chr10	16015001	16016000	7.63904e-07	1.27718e-05	-0.336772	chr10	15791776	15807065	uc007elr.1_AK021178	+	-207937	chr10	16951093	17095782	uc007els.2_Gm20125	-	935094
chr10	16145001	16146000	5.76339e-06	6.41678e-05	0.291512	chr10	15791776	15807065	uc007elr.1_AK021178	+	-337937	chr10	16951093	17095782	uc007els.2_Gm20125	-	805094
chr10	17717001	17718000	5.60921e-10	4.74655e-08	-0.29293	chr10	17110679	17110723	uc029qvv.1_JA187517	+	-606279	chr10	17723227	17725674	uc007elt.2_Cited2	+	5228
chr10	18160001	18161000	2.45408e-07	5.21149e-06	0.462505	chr10	18129021	18210890	uc011xan.1_Ect2l	-	0	chr10	18213684	18234981	uc007eme.1_Ccdc28a	-	52685
chr10	18181001	18182000	0.00182173	0.00697051	0.298484	chr10	18129021	18210890	uc011xan.1_Ect2l	-	0	chr10	18213684	18234981	uc007eme.1_Ccdc28a	-	31685
chr10	18395001	18396000	1.03244e-07	2.64863e-06	-0.272229	chr10	18216783	18234981	uc007emf.1_Ccdc28a	-	-160021	chr10	18407637	18421140	uc007emg.1_Nhsl1	+	11638
chr10	18589001	18590000	4.33408e-10	3.9144e-08	-0.468314	chr10	18588010	18743758	uc007emo.1_D10Bwg1379e	-	0	chr10	18743470	18837979	uc007emp.1_AK139076	+	153471
chr10	18591001	18592000	6.72114e-06	7.26016e-05	0.300762	chr10	18588010	18743758	uc007emo.1_D10Bwg1379e	-	0	chr10	18743470	18837979	uc007emp.1_AK139076	+	151471
chr10	18592001	18593000	1.37978e-08	5.49079e-07	0.437281	chr10	18588010	18743758	uc007emo.1_D10Bwg1379e	-	0	chr10	18743470	18837979	uc007emp.1_AK139076	+	150471
chr10	18709001	18710000	7.76639e-05	0.000524171	0.251657	chr10	18588010	18743758	uc007emo.1_D10Bwg1379e	-	0	chr10	18743470	18837979	uc007emp.1_AK139076	+	33471
chr10	19251001	19252000	3.96379e-07	7.61803e-06	0.40008	chr10	19167237	19207947	uc007end.2_Gm20139	+	-43055	chr10	19356538	19358604	uc007ene.1_Olig3	+	104539
chr10	19295001	19296000	4.03154e-08	1.27199e-06	0.260991	chr10	19167237	19207947	uc007end.2_Gm20139	+	-87055	chr10	19356538	19358604	uc007ene.1_Olig3	+	60539
chr10	19335001	19336000	0.000517201	0.00247671	0.306521	chr10	19167237	19207947	uc007end.2_Gm20139	+	-127055	chr10	19356538	19358604	uc007ene.1_Olig3	+	20539
chr10	19358001	19359000	7.01734e-09	3.30595e-07	0.367806	chr10	19356538	19358604	uc007ene.1_Olig3	+	0	chr10	19486714	19507311	uc007enf.1_AK029599	+	127715
chr10	19574001	19575000	0.013747	0.0365379	0.253658	chr10	19486714	19507311	uc007enf.1_AK029599	+	-66691	chr10	19591957	19610225	uc007eng.1_Ifngr1	+	16958
chr10	19851001	19852000	2.58928e-09	1.53628e-07	0.279161	chr10	19847916	19851459	uc007enk.1_Slc35d3	-	0	chr10	19860089	19907674	uc007enl.2_Pex7	-	8090
chr10	19922001	19923000	5.71573e-08	1.66435e-06	0.263686	chr10	19860089	19907674	uc011xay.1_Pex7	-	-14328	chr10	19934525	20142750	uc007enm.2_Map3k5	+	11526
chr10	19995001	19996000	0.000126029	0.000778767	-0.278559	chr10	19934525	20142750	uc011xaz.1_Map3k5	+	0	chr10	20148919	20257538	uc007enn.2_Map7	+	152920
chr10	20315001	20316000	5.10035e-09	2.5828e-07	0.401721	chr10	20312468	20342501	uc007env.1_Bclaf1	+	0	chr10	20322968	20344613	uc007enw.1_Bclaf1	+	6969
chr10	20409001	20410000	0.00152188	0.00601217	-0.373119	chr10	20398003	20725068	uc007eob.2_Pde7b	-	0	chr10	20479626	20725068	uc007eoc.2_Pde7b	-	69627
chr10	20700001	20701000	6.47513e-05	0.000452274	0.289321	chr10	20479626	20725068	uc007eoc.2_Pde7b	-	0	chr10	20952546	20966021	uc011xbc.1_Ahi1	+	251547
chr10	21252001	21253000	9.22674e-06	9.35994e-05	0.256531	chr10	21186943	21188617	uc007eok.1_AK041716	+	-63385	chr10	21295978	21311198	uc007eol.2_Hbs1l	+	42979
chr10	21343001	21344000	3.68519e-05	0.000284995	-0.274572	chr10	21295978	21368889	uc007eoo.1_Hbs1l	+	0	chr10	21377299	21396578	uc007eoq.1_Aldh8a1	+	33300
chr10	21679001	21680000	0.000130122	0.000798759	0.317332	chr10	21593144	21622375	uc007eos.2_1700020N01Rik	+	-56627	chr10	21690844	21693978	uc007eot.1_Gm5420	+	10845
chr10	21910001	21911000	1.98392e-09	1.25272e-07	-0.40588	chr10	21882183	21999902	uc007eov.2_Sgk1	+	0	chr10	21978671	21999902	uc011xbf.1_Sgk1	+	67672
chr10	22273001	22274000	5.44108e-10	4.64355e-08	0.255065	chr10	22264242	22302835	uc007epi.1_AK153639	-	0	chr10	22273473	22371114	uc011xbo.1_Raet1d	+	0
chr10	22290001	22291000	2.11771e-05	0.000182411	0.367832	chr10	22273473	22371114	uc011xbo.1_Raet1d	+	0	chr10	22306719	22312942	uc007epk.2_C920009B18Rik	+	15720
chr10	22307001	22308000	5.22824e-10	4.50999e-08	-0.344502	chr10	22306719	22321765	uc007epl.2_C920009B18Rik	+	0	chr10	22361893	22374139	uc007epm.1_Raet1d	+	53894
chr10	22441001	22442000	2.87351e-06	3.66777e-05	0.371135	chr10	22402812	22407470	uc007epn.2_Gm10825	+	-33532	chr10	22645010	22703880	uc007epo.2_Slc2a12	+	203011
chr10	22540001	22541000	0.000209775	0.00117887	0.296609	chr10	22402812	22407470	uc007epn.2_Gm10825	+	-132532	chr10	22645010	22703880	uc007epo.2_Slc2a12	+	104011
chr10	22645001	22646000	1.65038e-06	2.35465e-05	0.306347	chr10	22402812	22407470	uc007epn.2_Gm10825	+	-237532	chr10	22645010	22703880	uc007epo.2_Slc2a12	+	0
chr10	22697001	22698000	7.3095e-07	1.233e-05	-0.278548	chr10	22645010	22703880	uc007epo.2_Slc2a12	+	0	chr10	22703876	22731447	uc007epp.2_Tbpl1	-	5877
chr10	22765001	22766000	6.69447e-05	0.000464772	0.334922	chr10	22703876	22731933	uc007epq.2_Tbpl1	-	-33069	chr10	22815748	22823330	uc007epr.1_AK033378	+	49749
chr10	22785001	22786000	0.00139143	0.00558186	-0.339682	chr10	22703876	22731933	uc007epq.2_Tbpl1	-	-53069	chr10	22815748	22823330	uc007epr.1_AK033378	+	29749
chr10	22791001	22792000	1.24098e-08	5.06638e-07	0.283262	chr10	22703876	22731933	uc007epq.2_Tbpl1	-	-59069	chr10	22815748	22823330	uc007epr.1_AK033378	+	23749
chr10	22908001	22909000	0.00534432	0.0168247	-0.251313	chr10	22815748	22823330	uc007epr.1_AK033378	+	-84672	chr10	23104167	23349903	uc007ept.1_Eya4	-	195168
chr10	23259001	23260000	6.08309e-05	0.0004301	-0.250543	chr10	23104167	23350786	uc007epu.1_Eya4	-	0	chr10	23611262	23622148	uc007epv.1_AK019688	-	351263
chr10	23686001	23687000	1.38206e-05	0.000129568	0.329325	chr10	23659962	23660020	uc029qwh.1_AB335713	-	-25982	chr10	23777082	23777154	uc033fox.1_TRNA-Trp	-	90083
chr10	23720001	23721000	2.26493e-06	3.0354e-05	0.440171	chr10	23659962	23660020	uc029qwh.1_AB335713	-	-59982	chr10	23777082	23777154	uc033fox.1_TRNA-Trp	-	56083
chr10	23870001	23871000	1.06432e-07	2.71338e-06	-0.318132	chr10	23851461	23869843	uc007eqb.2_Vnn3	+	-159	chr10	23894687	23905343	uc007eqc.2_Vnn1	+	23688
chr10	23970001	23971000	1.00305e-10	1.26489e-08	-0.278024	chr10	23960493	23961537	uc007eqg.1_Taar4	+	-8465	chr10	23970705	23971719	uc007eqh.1_Taar5	+	0
chr10	23978001	23979000	6.32785e-11	8.78682e-09	0.504318	chr10	23970705	23971719	uc007eqh.1_Taar5	+	-6283	chr10	23984608	23985646	uc007eqi.1_Taar6	-	5609
chr10	24052001	24053000	3.28106e-07	6.56895e-06	0.475857	chr10	24049509	24050586	uc007eqn.1_Taar7f	+	-1416	chr10	24076499	24077534	uc007eqo.1_Taar8a	+	23500
chr10	24086001	24087000	3.09368e-08	1.03447e-06	-0.330152	chr10	24076499	24077534	uc007eqo.1_Taar8a	+	-8468	chr10	24091259	24092294	uc007eqp.1_Taar8b	-	4260
chr10	24221001	24222000	1.74496e-07	4.01074e-06	0.324335	chr10	24149329	24188959	uc007eqt.1_Stx7	+	-32043	chr10	24223516	24302783	uc007equ.1_Moxd1	+	1517
chr10	24333001	24334000	1.4925e-08	5.83381e-07	-0.321937	chr10	24223516	24302783	uc007equ.1_Moxd1	+	-30219	chr10	24589304	24595812	uc007eqv.1_AK014660	-	255305
chr10	24888001	24889000	9.95165e-07	1.57451e-05	0.258146	chr10	24869985	24913529	uc007erf.2_Med23	+	0	chr10	24910663	24910733	uc033foy.1_Mir6905	+	21664
chr10	25004001	25005000	1.12692e-05	0.000110015	0.49216	chr10	24915206	24927470	uc007erg.2_Arg1	-	-76532	chr10	25119885	25119930	uc029qwk.1_AB349811	+	114886
chr10	25005001	25006000	2.81238e-83	2.25135e-79	-0.808498	chr10	24915206	24927470	uc007erg.2_Arg1	-	-77532	chr10	25119885	25119930	uc029qwk.1_AB349811	+	113886
chr10	25016001	25017000	8.71155e-08	2.31438e-06	0.294042	chr10	24915206	24927470	uc007erg.2_Arg1	-	-88532	chr10	25119885	25119930	uc029qwk.1_AB349811	+	102886
chr10	25064001	25065000	9.2083e-05	0.00060194	0.291649	chr10	24915206	24927470	uc007erg.2_Arg1	-	-136532	chr10	25119885	25119930	uc029qwk.1_AB349811	+	54886
chr10	25257001	25258000	2.73768e-05	0.00022414	0.27671	chr10	25169089	25299163	uc007eri.1_Akap7	-	0	chr10	25279328	25299163	uc011xbv.1_Akap7	-	21329
chr10	25350001	25351000	1.73537e-07	3.99375e-06	-0.340176	chr10	25279328	25299163	uc011xbv.1_Akap7	-	-50839	chr10	25359797	25523518	uc007erk.2_Epb4.1l2	+	8798
chr10	25751001	25752000	1.4784e-09	1.00229e-07	-0.51775	chr10	25527942	25536272	uc007erv.2_Smlr1	-	-214730	chr10	25779313	25837437	uc029qwl.1_4930401C15Rik	-	27314
chr10	25835001	25836000	1.92112e-06	2.65848e-05	-0.375757	chr10	25779313	25837437	uc029qwl.1_4930401C15Rik	-	0	chr10	25894466	25894505	uc029qwm.1_Mir680-3	-	58467
chr10	26014001	26015000	4.47754e-06	5.22831e-05	0.519572	chr10	25991185	26079052	uc007erw.2_Tmem200a	-	0	chr10	26078254	26079447	uc011xbw.1_Gm9767	+	63255
chr10	26077001	26078000	0.00375201	0.0125907	-0.262133	chr10	25991185	26079052	uc007erw.2_Tmem200a	-	0	chr10	26078254	26079447	uc011xbw.1_Gm9767	+	255
chr10	26302001	26303000	5.79408e-05	0.000412889	-0.294276	chr10	26275451	26375971	uc007esc.1_L3mbtl3	-	0	chr10	26333857	26375971	uc007esd.1_L3mbtl3	-	30858
chr10	26680001	26681000	0.00201771	0.00757467	-0.31406	chr10	26673445	26674651	uc011xby.1_Gm8709	-	-5351	chr10	26695604	26695654	uc011xbz.1_AB335823	+	14605
chr10	26752001	26753000	4.65638e-05	0.000344831	-0.252443	chr10	26746706	26746767	uc029qwr.1_AB335922	+	-5235	chr10	26772511	26918648	uc007ese.1_Arhgap18	+	19512
chr10	26913001	26914000	9.71955e-05	0.000629292	0.35023	chr10	26772511	26918648	uc007ese.1_Arhgap18	+	0	chr10	26981284	27212254	uc007esf.2_Lama2	-	67285
chr10	27155001	27156000	1.3153e-05	0.000124487	0.301598	chr10	26981284	27616942	uc033fpa.1_Lama2	-	0	chr10	27264407	27616942	uc007esh.1_Lama2	-	108408
chr10	28091001	28092000	5.71826e-12	1.27154e-09	0.520479	chr10	28074819	28597397	uc011xcb.1_Ptprk	+	0	chr10	28668394	28764039	uc007eso.1_Themis	+	576395
chr10	28225001	28226000	2.38098e-05	0.000200303	-0.280498	chr10	28074819	28597397	uc011xcb.1_Ptprk	+	0	chr10	28668394	28764039	uc007eso.1_Themis	+	442395
chr10	28645001	28646000	0.00106191	0.00446484	-0.387092	chr10	28074819	28597397	uc011xcb.1_Ptprk	+	-47605	chr10	28668394	28764039	uc007eso.1_Themis	+	22395
chr10	28812001	28813000	2.47798e-09	1.48122e-07	-0.278733	chr10	28668394	28882749	uc007esq.1_Themis	+	0	chr10	28921962	28923507	uc011xcc.1_4930519F09Rik	-	108963
chr10	28887001	28888000	4.58133e-10	4.08761e-08	0.393077	chr10	28668394	28882749	uc007esq.1_Themis	+	-4253	chr10	28921962	28923507	uc011xcc.1_4930519F09Rik	-	33963
chr10	29019001	29020000	8.63618e-09	3.85195e-07	0.557774	chr10	28972287	28986306	uc007ess.2_2310057J18Rik	-	-32696	chr10	29143995	29199628	uc007est.1_Soga3	+	123996
chr10	29146001	29147000	1.4485e-09	9.86676e-08	0.368589	chr10	29143995	29199628	uc007esu.1_Soga3	+	0	chr10	29211642	29230779	uc007esv.2_9330159F19Rik	+	64643
chr10	30328001	30329000	2.67711e-05	0.000220253	-0.342586	chr10	30196008	30200540	uc007etd.2_Cenpw	-	-127462	chr10	30534224	30600749	uc007ete.1_Trmt11	-	205225
chr10	32385001	32386000	0.000848988	0.00371648	-0.401099	chr10	31950578	32889915	uc007ety.2_Nkain2	-	0	chr10	33083482	33196317	uc007etz.2_Trdn	+	697483
chr10	32890001	32891000	1.22411e-07	3.03568e-06	0.509443	chr10	31950578	32889915	uc007ety.2_Nkain2	-	-87	chr10	33083482	33196317	uc007etz.2_Trdn	+	192483
chr10	33269001	33270000	6.95253e-05	0.000479284	-0.294594	chr10	33083482	33476709	uc011xcl.1_Trdn	+	0	chr10	33512333	33624600	uc007eue.1_Clvs2	-	242334
chr10	33623001	33624000	2.43154e-11	4.09957e-09	-0.391343	chr10	33594310	33624600	uc007euf.1_Clvs2	-	0	chr10	33766423	33782115	uc011xcm.1_Gm4794	-	142424
chr10	33704001	33705000	3.34713e-06	4.14334e-05	-0.345129	chr10	33594310	33624600	uc007euf.1_Clvs2	-	-79402	chr10	33766423	33782115	uc011xcm.1_Gm4794	-	61424
chr10	34022001	34023000	0.000355735	0.00182013	0.273239	chr10	33996554	34019616	uc007eun.1_Rwdd1	-	-2386	chr10	34037596	34109815	uc007euo.1_Trappc3l	+	14597
chr10	34128001	34129000	1.91843e-09	1.22356e-07	0.428627	chr10	34126066	34127972	uc007eur.2_Fam26f	-	-30	chr10	34151392	34207551	uc007eus.1_Dse	-	22393
chr10	34645001	34646000	1.26513e-06	1.90917e-05	-0.303175	chr10	34483399	34611230	uc007evb.2_Frk	+	-33772	chr10	35710554	35711559	uc033fpd.1_Amd2	-	1064555
chr10	34775001	34776000	2.59353e-07	5.44414e-06	-0.279459	chr10	34483399	34611230	uc007evb.2_Frk	+	-163772	chr10	35710554	35711559	uc033fpd.1_Amd2	-	934555
chr10	35521001	35522000	3.55066e-05	0.00027659	0.273783	chr10	34483399	34611230	uc007evb.2_Frk	+	-909772	chr10	35710554	35711559	uc033fpd.1_Amd2	-	188555
chr10	35634001	35635000	8.37268e-05	0.000557087	-0.256387	chr10	34483399	34611230	uc007evb.2_Frk	+	-1022772	chr10	35710554	35711559	uc033fpd.1_Amd2	-	75555
chr10	35875001	35876000	0.000555282	0.00262418	-0.282795	chr10	35710554	35711559	uc033fpd.1_Amd2	-	-163443	chr10	36506806	36834394	uc007evc.1_Hs3st5	+	630807
chr10	35877001	35878000	8.528e-07	1.39379e-05	-0.311653	chr10	35710554	35711559	uc033fpd.1_Amd2	-	-165443	chr10	36506806	36834394	uc007evc.1_Hs3st5	+	628807
chr10	35982001	35983000	2.05399e-08	7.49433e-07	-0.329546	chr10	35710554	35711559	uc033fpd.1_Amd2	-	-270443	chr10	36506806	36834394	uc007evc.1_Hs3st5	+	523807
chr10	36015001	36016000	2.89966e-05	0.000235017	-0.26824	chr10	35710554	35711559	uc033fpd.1_Amd2	-	-303443	chr10	36506806	36834394	uc007evc.1_Hs3st5	+	490807
chr10	36257001	36258000	3.2288e-07	6.48248e-06	-0.271919	chr10	35710554	35711559	uc033fpd.1_Amd2	-	-545443	chr10	36506806	36834394	uc007evc.1_Hs3st5	+	248807
chr10	36327001	36328000	3.17011e-08	1.05317e-06	-0.315742	chr10	35710554	35711559	uc033fpd.1_Amd2	-	-615443	chr10	36506806	36834394	uc007evc.1_Hs3st5	+	178807
chr10	36393001	36394000	4.34063e-08	1.34743e-06	-0.495797	chr10	35710554	35711559	uc033fpd.1_Amd2	-	-681443	chr10	36506806	36834394	uc007evc.1_Hs3st5	+	112807
chr10	36492001	36493000	2.16511e-06	2.92591e-05	-0.252986	chr10	35710554	35711559	uc033fpd.1_Amd2	-	-780443	chr10	36506806	36834394	uc007evc.1_Hs3st5	+	13807
chr10	36506001	36507000	2.24373e-10	2.36832e-08	0.489934	chr10	35710554	35711559	uc033fpd.1_Amd2	-	-794443	chr10	36506806	36834394	uc011xcs.1_Hs3st5	+	0
chr10	36507001	36508000	5.10138e-15	2.6245e-12	0.621811	chr10	36506806	36834394	uc011xcs.1_Hs3st5	+	0	chr10	36974543	36996111	uc007eve.1_Hdac2	+	466544
chr10	36748001	36749000	0.00124009	0.00507675	-0.309312	chr10	36506806	36834394	uc011xcs.1_Hs3st5	+	0	chr10	36974543	36996111	uc007eve.1_Hdac2	+	225544
chr10	36948001	36949000	1.81192e-05	0.000160777	0.314455	chr10	36506806	36834394	uc011xcs.1_Hs3st5	+	-113608	chr10	36974543	36996111	uc007eve.1_Hdac2	+	25544
chr10	38803001	38804000	5.49784e-05	0.000395241	-0.367707	chr10	38295073	38313846	uc007evk.1_AK081794	-	-489156	chr10	38820540	38821779	uc011xct.1_Rfpl4b	-	16541
chr10	38895001	38896000	4.9527e-11	7.272e-09	-0.355071	chr10	38820540	38821779	uc011xct.1_Rfpl4b	-	-73223	chr10	38965514	39034249	uc007evm.2_Lama4	+	69515
chr10	39358001	39359000	2.32594e-07	4.99449e-06	-0.284595	chr10	39150970	39163794	uc011xcu.1_Wisp3	-	-194208	chr10	39369798	39565374	uc007evx.2_Fyn	+	10799
chr10	39974001	39975000	2.38476e-05	0.000200528	0.318633	chr10	39968152	39986646	uc011xcx.1_BC021785	-	0	chr10	40001572	40025268	uc007ewl.2_AI317395	-	26573
chr10	39975001	39976000	5.09087e-06	5.80615e-05	0.32446	chr10	39968152	39986646	uc011xcx.1_BC021785	-	0	chr10	40001572	40025268	uc007ewl.2_AI317395	-	25573
chr10	39990001	39991000	1.42564e-06	2.09633e-05	0.322943	chr10	39968152	39986646	uc011xcx.1_BC021785	-	-3356	chr10	40001572	40025268	uc007ewl.2_AI317395	-	10573
chr10	40502001	40503000	5.1432e-08	1.53429e-06	-0.311753	chr10	40349307	40483818	uc007ewy.2_Cdk19	+	-18184	chr10	40570361	40604132	uc007ewz.1_Slc22a16	+	67362
chr10	40630001	40631000	0.00681362	0.0205339	0.272818	chr10	40570361	40604132	uc007ewz.1_Slc22a16	+	-25870	chr10	40630010	40681847	uc007exc.2_Ddo	+	0
chr10	40812001	40813000	3.08155e-09	1.7525e-07	0.29057	chr10	40683281	40811083	uc007exd.1_Mettl24	+	-919	chr10	40831621	40883143	uc007exe.3_Cdc40	-	18622
chr10	41415001	41416000	3.34982e-08	1.099e-06	0.394938	chr10	41188171	41303241	uc007exk.1_Fig4	-	-111761	chr10	41450357	41453468	uc007exl.2_Zbtb24	+	34358
chr10	41571001	41572000	8.68009e-05	0.000573613	-0.261733	chr10	41568015	41576476	uc007exy.1_5730435O14Rik	+	0	chr10	41718839	41809663	uc007exz.2_Cep57l1	-	146840
chr10	41607001	41608000	7.98992e-05	0.000536597	0.362017	chr10	41538848	41587753	uc007exw.2_Ccdc162	-	-19249	chr10	41718839	41809663	uc007exz.2_Cep57l1	-	110840
chr10	41640001	41641000	2.99447e-08	1.0082e-06	0.350395	chr10	41538848	41587753	uc007exw.2_Ccdc162	-	-52249	chr10	41718839	41809663	uc007exz.2_Cep57l1	-	77840
chr10	41958001	41959000	0.000488813	0.0023635	0.254562	chr10	41914989	42018382	uc007eyh.3_Armc2	-	0	chr10	41999809	42018382	uc007eyi.2_Armc2	-	40810
chr10	42006001	42007000	1.26047e-24	1.15713e-21	-0.262545	chr10	41999809	42018382	uc007eyi.2_Armc2	-	0	chr10	42018215	42018810	uc007eyj.1_AK006037	+	11216
chr10	42071001	42072000	0.000523113	0.00249939	-0.347141	chr10	42018215	42018810	uc007eyj.1_AK006037	+	-52192	chr10	42181846	42184716	uc007eyk.2_AB335951	-	109847
chr10	42085001	42086000	2.98946e-05	0.000240697	-0.362701	chr10	42018215	42018810	uc007eyj.1_AK006037	+	-66192	chr10	42181846	42184716	uc007eyk.2_AB335951	-	95847
chr10	42094001	42095000	2.04715e-10	2.2062e-08	-0.264686	chr10	42018215	42018810	uc007eyj.1_AK006037	+	-75192	chr10	42181846	42184716	uc007eyk.2_AB335951	-	86847
chr10	42170001	42171000	1.39183e-05	0.000130277	-0.316331	chr10	42018215	42018810	uc007eyj.1_AK006037	+	-151192	chr10	42181846	42184716	uc007eyk.2_AB335951	-	10847
chr10	42308001	42309000	4.53141e-07	8.46664e-06	0.382464	chr10	42247445	42276742	uc007eyp.1_Foxo3	-	-31260	chr10	42312584	42478565	uc007eyq.1_Lace1	-	3585
chr10	42346001	42347000	4.44369e-05	0.000331893	0.286301	chr10	42312584	42478565	uc011xdh.1_Lace1	-	0	chr10	42502053	42535369	uc007eyr.2_Snx3	+	155054
chr10	42420001	42421000	0.000902097	0.00390533	0.261153	chr10	42312584	42478565	uc011xdh.1_Lace1	-	0	chr10	42502053	42535369	uc007eyr.2_Snx3	+	81054
chr10	42633001	42634000	0.00213073	0.00792115	0.275508	chr10	42561970	42583588	uc007eyt.1_Nr2e1	-	-49414	chr10	42678915	42699991	uc007eyu.2_Ostm1	+	44916
chr10	42726001	42727000	4.01095e-13	1.36052e-10	-0.783352	chr10	42678915	42702462	uc007eyv.2_Ostm1	+	-23540	chr10	42740538	42758660	uc007eyw.1_AK035573	-	13539
chr10	42923001	42924000	2.20354e-07	4.78193e-06	-0.385904	chr10	42860511	42960782	uc011xdi.1_Scml4	+	0	chr10	42934337	42960782	uc007ezd.2_Scml4	+	10338
chr10	43010001	43011000	1.14884e-05	0.000111681	-0.313287	chr10	43002499	43174530	uc007ezf.1_Sobp	-	0	chr10	43020981	43174530	uc007ezg.1_Sobp	-	9982
chr10	43011001	43012000	2.69518e-06	3.48731e-05	0.475711	chr10	43002499	43174530	uc007ezf.1_Sobp	-	0	chr10	43020981	43174530	uc007ezg.1_Sobp	-	8982
chr10	43021001	43022000	4.71498e-06	5.45875e-05	0.341079	chr10	43020981	43174530	uc007ezg.1_Sobp	-	0	chr10	43174698	43176565	uc011xdj.2_9030612E09Rik	+	152699
chr10	43035001	43036000	7.85065e-07	1.30569e-05	0.285599	chr10	43020981	43174530	uc007ezg.1_Sobp	-	0	chr10	43174698	43176565	uc011xdj.2_9030612E09Rik	+	138699
chr10	43713001	43714000	4.50143e-06	5.25192e-05	-0.422333	chr10	43593426	43630913	uc007ezm.2_F830002L21Rik	+	-82089	chr10	43746157	43765836	uc029qwy.1_1700027J07Rik	+	32158
chr10	43814001	43815000	4.75923e-07	8.81119e-06	0.257111	chr10	43746157	43765836	uc029qwy.1_1700027J07Rik	+	-48166	chr10	43835163	43835211	uc029qwz.1_AB351889	-	20164
chr10	43815001	43816000	0.0176704	0.0447854	0.334113	chr10	43746157	43765836	uc029qwy.1_1700027J07Rik	+	-49166	chr10	43835163	43835211	uc029qwz.1_AB351889	-	19164
chr10	43832001	43833000	0.000357602	0.00182803	0.31846	chr10	43746157	43765836	uc029qwy.1_1700027J07Rik	+	-66166	chr10	43835163	43835211	uc029qwz.1_AB351889	-	2164
chr10	43883001	43884000	0.00018851	0.00108116	-0.341991	chr10	43880913	43901736	uc007ezo.1_Qrsl1	-	0	chr10	43901806	43947862	uc007ezp.1_Rtn4ip1	+	17807
chr10	44005001	44006000	1.33658e-08	5.36263e-07	-0.285721	chr10	43950306	44004846	uc007ezq.2_Aim1	-	-156	chr10	44170446	44219585	uc007ezs.2_Speer5-ps1	+	164447
chr10	44097001	44098000	3.51956e-14	1.55146e-11	-0.277226	chr10	43950306	44004846	uc007ezq.2_Aim1	-	-92156	chr10	44170446	44219585	uc007ezs.2_Speer5-ps1	+	72447
chr10	44453001	44454000	1.60156e-06	2.29894e-05	-0.43654	chr10	44446716	44528501	uc007ezw.1_Prdm1	-	0	chr10	45067213	45158995	uc007ezx.1_Prep	+	613214
chr10	44510001	44511000	2.80971e-06	3.6045e-05	0.299068	chr10	44446716	44528501	uc007ezw.1_Prdm1	-	0	chr10	45067213	45158995	uc007ezx.1_Prep	+	556214
chr10	44842001	44843000	1.61047e-06	2.30907e-05	0.315497	chr10	44446716	44528501	uc007ezw.1_Prdm1	-	-313501	chr10	45067213	45158995	uc007ezx.1_Prep	+	224214
chr10	44892001	44893000	1.50861e-09	1.01702e-07	0.331917	chr10	44446716	44528501	uc007ezw.1_Prdm1	-	-363501	chr10	45067213	45158995	uc007ezx.1_Prep	+	174214
chr10	44902001	44903000	0.0003214	0.00167329	0.381731	chr10	44446716	44528501	uc007ezw.1_Prdm1	-	-373501	chr10	45067213	45158995	uc007ezx.1_Prep	+	164214
chr10	44997001	44998000	1.95998e-06	2.70235e-05	0.363766	chr10	44446716	44528501	uc007ezw.1_Prdm1	-	-468501	chr10	45067213	45158995	uc007ezx.1_Prep	+	69214
chr10	45272001	45273000	4.65246e-07	8.65082e-06	0.330246	chr10	45067213	45158995	uc007ezx.1_Prep	+	-113007	chr10	45289304	45318450	uc007ezy.1_Popdc3	+	16305
chr10	45292001	45293000	4.52917e-05	0.000337082	-0.400572	chr10	45289304	45318450	uc011xdo.1_Popdc3	+	0	chr10	45335761	45369708	uc007ezz.1_Bves	+	42762
chr10	45311001	45312000	0.00262364	0.0093936	0.290895	chr10	45289304	45318450	uc011xdo.1_Popdc3	+	0	chr10	45335761	45369708	uc007ezz.1_Bves	+	23762
chr10	45572001	45573000	0.00121748	0.00500086	0.298855	chr10	45418362	45486395	uc007fab.1_Lin28b	-	-85607	chr10	45577828	45712345	uc007fad.2_Hace1	+	4829
chr10	45759001	45760000	6.16675e-06	6.76983e-05	-0.25343	chr10	45672538	45712345	uc007faf.2_Hace1	+	-46657	chr10	45807703	45852018	uc029qxa.1_D030045P18Rik	+	47704
chr10	45807001	45808000	1.91145e-05	0.000167823	0.257317	chr10	45672538	45712345	uc007faf.2_Hace1	+	-94657	chr10	45807703	45852018	uc029qxa.1_D030045P18Rik	+	0
chr10	46105001	46106000	0.00556274	0.0173833	0.268562	chr10	45807703	45852018	uc029qxa.1_D030045P18Rik	+	-252984	chr10	46244747	46244770	uc029qxb.1_Snord14d	+	138748
chr10	46106001	46107000	1.19179e-09	8.48491e-08	0.583314	chr10	45807703	45852018	uc029qxa.1_D030045P18Rik	+	-253984	chr10	46244747	46244770	uc029qxb.1_Snord14d	+	137748
chr10	46719001	46720000	0.000374811	0.00189902	-0.298096	chr10	46244747	46244770	uc029qxb.1_Snord14d	+	-474232	chr10	49093680	49095843	uc029qxc.1_C130030K03Rik	-	2373681
chr10	46790001	46791000	1.34846e-06	2.00673e-05	-0.479879	chr10	46244747	46244770	uc029qxb.1_Snord14d	+	-545232	chr10	49093680	49095843	uc029qxc.1_C130030K03Rik	-	2302681
chr10	47454001	47455000	2.13708e-08	7.73399e-07	0.547522	chr10	46244747	46244770	uc029qxb.1_Snord14d	+	-1209232	chr10	49093680	49095843	uc029qxc.1_C130030K03Rik	-	1638681
chr10	47610001	47611000	0.00163221	0.00637205	-0.278076	chr10	46244747	46244770	uc029qxb.1_Snord14d	+	-1365232	chr10	49093680	49095843	uc029qxc.1_C130030K03Rik	-	1482681
chr10	48139001	48140000	2.92648e-05	0.000236711	0.269483	chr10	46244747	46244770	uc029qxb.1_Snord14d	+	-1894232	chr10	49093680	49095843	uc029qxc.1_C130030K03Rik	-	953681
chr10	48950001	48951000	2.92974e-10	2.90259e-08	-0.521481	chr10	46244747	46244770	uc029qxb.1_Snord14d	+	-2705232	chr10	49093680	49095843	uc029qxc.1_C130030K03Rik	-	142681
chr10	49288001	49289000	4.34814e-06	5.10192e-05	0.255899	chr10	49099462	49788754	uc007fah.2_Grik2	-	0	chr10	49495437	49788754	uc007fai.1_Grik2	-	206438
chr10	49510001	49511000	1.16677e-05	0.000113039	0.285473	chr10	49495437	49788754	uc007fai.1_Grik2	-	0	chr10	50592668	50851202	uc007fak.2_Ascc3	+	1081669
chr10	49512001	49513000	4.25851e-12	9.95616e-10	-0.691188	chr10	49495437	49788754	uc007fai.1_Grik2	-	0	chr10	50592668	50851202	uc007fak.2_Ascc3	+	1079669
chr10	49782001	49783000	5.14276e-09	2.60072e-07	0.268925	chr10	49495437	49788754	uc007fai.1_Grik2	-	0	chr10	50592668	50851202	uc007fak.2_Ascc3	+	809669
chr10	49783001	49784000	3.01054e-09	1.72239e-07	0.296535	chr10	49495437	49788754	uc007fai.1_Grik2	-	0	chr10	50592668	50851202	uc007fak.2_Ascc3	+	808669
chr10	49788001	49789000	1.59011e-10	1.80707e-08	0.32309	chr10	49495437	49788754	uc007fai.1_Grik2	-	0	chr10	50592668	50851202	uc007fak.2_Ascc3	+	803669
chr10	49841001	49842000	6.84906e-12	1.47226e-09	-0.483192	chr10	49495437	49788754	uc007fai.1_Grik2	-	-52248	chr10	50592668	50851202	uc007fak.2_Ascc3	+	750669
chr10	50560001	50561000	0.00186426	0.00710356	-0.271596	chr10	49495437	49788754	uc007fai.1_Grik2	-	-771248	chr10	50592668	50851202	uc007fak.2_Ascc3	+	31669
chr10	50892001	50893000	0.000232952	0.00128441	-0.310988	chr10	50592668	50851202	uc007fak.2_Ascc3	+	-40800	chr10	50895650	50989152	uc007fal.1_Sim1	+	2651
chr10	50895001	50896000	5.07373e-13	1.66186e-10	0.530078	chr10	50592668	50851202	uc007fak.2_Ascc3	+	-43800	chr10	50895650	50989152	uc007fal.1_Sim1	+	0
chr10	50897001	50898000	4.28692e-06	5.04306e-05	0.291123	chr10	50895650	50989152	uc007fal.1_Sim1	+	0	chr10	51480672	51486219	uc007fam.1_Gp49a	+	582673
chr10	50975001	50976000	8.73055e-05	0.000576338	-0.356993	chr10	50895650	50989152	uc007fal.1_Sim1	+	0	chr10	51480672	51486219	uc007fam.1_Gp49a	+	504673
chr10	51181001	51182000	0.0141782	0.0374732	-0.255811	chr10	50895650	50989152	uc007fal.1_Sim1	+	-191850	chr10	51480672	51486219	uc007fam.1_Gp49a	+	298673
chr10	51331001	51332000	3.50552e-06	4.29708e-05	-0.330741	chr10	50895650	50989152	uc007fal.1_Sim1	+	-341850	chr10	51480672	51486219	uc007fam.1_Gp49a	+	148673
chr10	51664001	51665000	0.000277461	0.00148222	0.416125	chr10	51614822	51631458	uc007faw.1_Gprc6a	-	-32544	chr10	51677759	51721908	uc007fax.2_Rfx6	+	12760
chr10	52037001	52038000	0.00394835	0.0131341	0.272716	chr10	52022685	52028471	uc007fba.1_Vgll2	+	-8531	chr10	52045925	52195244	uc007fbb.1_Ros1	-	7926
chr10	52052001	52053000	7.50847e-12	1.58323e-09	0.653802	chr10	52045925	52195244	uc007fbb.1_Ros1	-	0	chr10	52233618	52288545	uc007fbc.1_Dcbld1	+	180619
chr10	52338001	52339000	3.24011e-09	1.82827e-07	0.410179	chr10	52337023	52382124	uc007fbg.2_Gopc	-	0	chr10	52391607	52404604	uc007fbh.1_Nepn	+	52608
chr10	52378001	52379000	1.06182e-47	2.59147e-44	-0.365039	chr10	52337023	52382124	uc007fbg.2_Gopc	-	0	chr10	52391607	52404604	uc007fbh.1_Nepn	+	12608
chr10	52614001	52615000	1.88255e-05	0.00016578	0.352675	chr10	52542319	52545739	uc029qxe.1_Zfa-ps	-	-68263	chr10	52690500	53111622	uc007fbk.2_Slc35f1	+	75501
chr10	52674001	52675000	0.000343457	0.0017668	0.258038	chr10	52542319	52545739	uc029qxe.1_Zfa-ps	-	-128263	chr10	52690500	53111622	uc007fbk.2_Slc35f1	+	15501
chr10	52690001	52691000	4.07141e-10	3.72567e-08	0.478737	chr10	52542319	52545739	uc029qxe.1_Zfa-ps	-	-144263	chr10	52690500	53111622	uc007fbk.2_Slc35f1	+	0
chr10	52691001	52692000	1.04125e-09	7.65553e-08	0.426844	chr10	52690500	53111622	uc007fbk.2_Slc35f1	+	0	chr10	53278080	53280148	uc007fbl.2_Cep85l	-	586081
chr10	52705001	52706000	6.53554e-08	1.84842e-06	0.31574	chr10	52690500	53111622	uc007fbk.2_Slc35f1	+	0	chr10	53278080	53280148	uc007fbl.2_Cep85l	-	572081
chr10	53030001	53031000	7.45738e-05	0.00050725	0.353122	chr10	52690500	53111622	uc007fbk.2_Slc35f1	+	0	chr10	53278080	53280148	uc007fbl.2_Cep85l	-	247081
chr10	53217001	53218000	0.00236363	0.00862639	-0.263425	chr10	52690500	53111622	uc007fbk.2_Slc35f1	+	-105380	chr10	53278080	53280148	uc007fbl.2_Cep85l	-	60081
chr10	53750001	53751000	2.2603e-11	3.84979e-09	0.604878	chr10	53696996	53750909	uc007fbv.1_Fam184a	-	0	chr10	53906032	54075709	uc011xdx.1_Man1a	-	155033
chr10	53751001	53752000	7.7352e-10	6.07547e-08	0.51774	chr10	53696996	53750909	uc007fbv.1_Fam184a	-	-93	chr10	53906032	54075709	uc011xdx.1_Man1a	-	154033
chr10	54461001	54462000	1.77842e-05	0.000158528	-0.254603	chr10	54075921	54081081	uc007fbz.1_Gm16998	+	-379921	chr10	56014293	56228689	uc007fca.1_Tbc1d32	-	1552294
chr10	54882001	54883000	7.75017e-08	2.11627e-06	-0.39808	chr10	54075921	54081081	uc007fbz.1_Gm16998	+	-800921	chr10	56014293	56228689	uc007fca.1_Tbc1d32	-	1131294
chr10	54956001	54957000	2.68918e-05	0.000221	-0.270621	chr10	54075921	54081081	uc007fbz.1_Gm16998	+	-874921	chr10	56014293	56228689	uc007fca.1_Tbc1d32	-	1057294
chr10	55629001	55630000	0.00366743	0.0123537	-0.376302	chr10	54075921	54081081	uc007fbz.1_Gm16998	+	-1547921	chr10	56014293	56228689	uc007fca.1_Tbc1d32	-	384294
chr10	56115001	56116000	0.00182372	0.00697681	0.415385	chr10	56106916	56116880	uc007fcb.1_Msl3l2	+	0	chr10	56115180	56116296	uc033fpf.1_Msl3l2	+	0
chr10	56136001	56137000	5.24661e-11	7.58119e-09	-0.377043	chr10	56014293	56228689	uc007fca.1_Tbc1d32	-	0	chr10	56377272	56390419	uc007fcc.2_Gja1	+	240273
chr10	56640001	56641000	1.87156e-07	4.22553e-06	-0.287526	chr10	56431980	56475416	uc007fcj.1_AK146861	+	-164586	chr10	57478382	57486353	uc029qxg.1_4930467K11Rik	-	837383
chr10	56686001	56687000	3.1298e-06	3.92629e-05	0.331499	chr10	56431980	56475416	uc007fcj.1_AK146861	+	-210586	chr10	57478382	57486353	uc029qxg.1_4930467K11Rik	-	791383
chr10	56944001	56945000	2.68575e-07	5.59657e-06	0.449414	chr10	56431980	56475416	uc007fcj.1_AK146861	+	-468586	chr10	57478382	57486353	uc029qxg.1_4930467K11Rik	-	533383
chr10	57006001	57007000	4.5021e-08	1.38387e-06	-0.39607	chr10	56431980	56475416	uc007fcj.1_AK146861	+	-530586	chr10	57478382	57486353	uc029qxg.1_4930467K11Rik	-	471383
chr10	57291001	57292000	3.38345e-09	1.88509e-07	-0.404694	chr10	56431980	56475416	uc007fcj.1_AK146861	+	-815586	chr10	57478382	57486353	uc029qxg.1_4930467K11Rik	-	186383
chr10	57632001	57633000	1.18167e-08	4.88532e-07	0.316762	chr10	57631980	57741112	uc007fcq.2_Pkib	+	0	chr10	57645868	57741112	uc007fcr.1_Pkib	+	12869
chr10	57648001	57649000	2.65513e-07	5.5443e-06	-0.467573	chr10	57645868	57741112	uc011xdy.1_Pkib	+	0	chr10	57650980	57741112	uc007fcs.1_Pkib	+	1981
chr10	57649001	57650000	5.73938e-06	6.39254e-05	-0.373228	chr10	57645868	57741112	uc011xdy.1_Pkib	+	0	chr10	57650980	57741112	uc007fcs.1_Pkib	+	981
chr10	57852001	57853000	6.94182e-10	5.59957e-08	-0.261946	chr10	57794543	57811830	uc007fcu.1_Smpdl3a	+	-40172	chr10	58230650	58232675	uc007fcv.3_Dux	-	377651
chr10	58222001	58223000	0.000312751	0.00163682	-0.344861	chr10	57794543	57811830	uc007fcu.1_Smpdl3a	+	-410172	chr10	58230650	58232675	uc007fcv.3_Dux	-	7651
chr10	58230001	58231000	1.47591e-05	0.000136745	0.338543	chr10	57794543	57811830	uc007fcu.1_Smpdl3a	+	-418172	chr10	58230650	58232675	uc007fcv.3_Dux	-	0
chr10	58619001	58620000	3.95058e-07	7.59629e-06	0.400171	chr10	58600787	58675696	uc007fdh.2_Edar	-	0	chr10	58696744	58704277	uc007fdi.1_BB019430	+	76745
chr10	58622001	58623000	4.6016e-05	0.000341551	0.306571	chr10	58600787	58675696	uc007fdh.2_Edar	-	0	chr10	58696744	58704277	uc007fdi.1_BB019430	+	73745
chr10	59292001	59293000	7.3281e-07	1.23531e-05	-0.482247	chr10	59221921	59226433	uc011xed.1_Sowahc	+	-65569	chr10	59323295	59373304	uc007fdo.2_P4ha1	+	30296
chr10	59397001	59398000	0.00435659	0.0142414	0.304034	chr10	59323295	59373304	uc011xee.1_P4ha1	+	-23698	chr10	59403684	59421976	uc007fdq.1_Pla2g12b	+	5685
chr10	59403001	59404000	0.0013228	0.00535282	-0.250554	chr10	59323295	59373304	uc011xee.1_P4ha1	+	-29698	chr10	59403684	59421976	uc007fdq.1_Pla2g12b	+	0
chr10	60082001	60083000	0.000799243	0.0035402	0.265676	chr10	60003326	60099990	uc007fei.2_Ascc1	+	0	chr10	60106256	60127338	uc007fek.1_Spock2	+	23257
chr10	60202001	60203000	5.20745e-10	4.49787e-08	-0.357758	chr10	60181527	60219260	uc011xeg.1_Chst3	-	0	chr10	60277627	60302600	uc007feo.2_Psap	+	74628
chr10	60231001	60232000	0.000387184	0.00194924	0.288825	chr10	60181527	60219260	uc011xeg.1_Chst3	-	-11742	chr10	60277627	60302600	uc007feo.2_Psap	+	45628
chr10	60285001	60286000	1.2154e-07	3.01856e-06	0.289891	chr10	60284460	60302600	uc007feq.1_Psap	+	0	chr10	60302749	60305649	uc007fer.2_Cdh23	-	16750
chr10	60286001	60287000	0.000169683	0.000991776	0.29782	chr10	60284460	60302600	uc007feq.1_Psap	+	0	chr10	60302749	60305649	uc007fer.2_Cdh23	-	15750
chr10	60326001	60327000	1.34988e-06	2.00853e-05	0.323204	chr10	60302749	60696490	uc033fpm.1_Cdh23	-	0	chr10	60346850	60372684	uc007few.2_4632428N05Rik	+	19851
chr10	60502001	60503000	2.22166e-06	2.99022e-05	0.279603	chr10	60438795	60596807	uc011xel.1_Cdh23	-	0	chr10	60583078	60696490	uc007fez.1_Cdh23	-	80079
chr10	60648001	60649000	2.43078e-07	5.17299e-06	-0.397329	chr10	60628479	60653033	uc007ffa.1_Cdh23	-	0	chr10	60712071	60752782	uc007ffb.1_Slc29a3	-	63072
chr10	60659001	60660000	7.03048e-05	0.00048372	-0.261198	chr10	60583078	60696490	uc007fez.1_Cdh23	-	0	chr10	60712071	60752782	uc007ffb.1_Slc29a3	-	52072
chr10	60691001	60692000	6.95616e-09	3.28331e-07	-0.293538	chr10	60583078	60696490	uc007fez.1_Cdh23	-	0	chr10	60712071	60752782	uc007ffb.1_Slc29a3	-	20072
chr10	60697001	60698000	3.70847e-06	4.498e-05	0.45715	chr10	60583078	60696490	uc007fez.1_Cdh23	-	-512	chr10	60712071	60752782	uc007ffb.1_Slc29a3	-	14072
chr10	60698001	60699000	7.4678e-05	0.000507734	-0.268982	chr10	60583078	60696490	uc007fez.1_Cdh23	-	-1512	chr10	60712071	60752782	uc007ffb.1_Slc29a3	-	13072
chr10	60776001	60777000	3.00846e-08	1.01172e-06	-0.252796	chr10	60762594	60831581	uc007fff.1_Unc5b	-	0	chr10	60923022	60923113	uc033fpo.1_Mir6408	+	146023
chr10	60824001	60825000	0.000666252	0.00304851	0.283117	chr10	60762594	60831581	uc007fff.1_Unc5b	-	0	chr10	60923022	60923113	uc033fpo.1_Mir6408	+	98023
chr10	60912001	60913000	9.61237e-08	2.50613e-06	0.31192	chr10	60762594	60831581	uc007fff.1_Unc5b	-	-80421	chr10	60923022	60923113	uc033fpo.1_Mir6408	+	10023
chr10	60978001	60979000	4.98899e-06	5.70731e-05	0.26372	chr10	60931990	60940942	uc007ffh.1_AK158810	+	-37060	chr10	61031302	61038080	uc007ffi.1_Gm20611	+	52303
chr10	60989001	60990000	9.68045e-06	9.72603e-05	0.348741	chr10	60931990	60940942	uc007ffh.1_AK158810	+	-48060	chr10	61031302	61038080	uc007ffi.1_Gm20611	+	41303
chr10	60994001	60995000	1.61358e-06	2.3122e-05	0.292036	chr10	60931990	60940942	uc007ffh.1_AK158810	+	-53060	chr10	61031302	61038080	uc007ffi.1_Gm20611	+	36303
chr10	61053001	61054000	8.76548e-08	2.32488e-06	-0.263069	chr10	61031302	61038080	uc007ffi.1_Gm20611	+	-14922	chr10	61089330	61094329	uc007ffj.3_Pcbd1	+	35331
chr10	61062001	61063000	3.79633e-11	5.83527e-09	-0.312274	chr10	61031302	61038080	uc007ffi.1_Gm20611	+	-23922	chr10	61089330	61094329	uc007ffj.3_Pcbd1	+	26331
chr10	61166001	61167000	2.18174e-05	0.000186811	-0.315751	chr10	61098641	61147665	uc011xep.1_Sgpl1	-	-18337	chr10	61171963	61180680	uc007ffm.2_Tbata	+	4964
chr10	61238001	61239000	6.21853e-06	6.8177e-05	0.46211	chr10	61197111	61273438	uc011xes.1_Adamts14	-	0	chr10	61297835	61304263	uc007ffv.2_Prf1	+	58836
chr10	61286001	61287000	0.00301199	0.0105222	0.26842	chr10	61197111	61273438	uc011xes.1_Adamts14	-	-12564	chr10	61297835	61304263	uc007ffv.2_Prf1	+	10836
chr10	61415001	61416000	2.87506e-08	9.74551e-07	-0.361303	chr10	61319656	61383523	uc007ffx.2_Pald1	-	-31479	chr10	61417971	61425337	uc007ffy.2_Nodal	+	1972
chr10	61419001	61420000	4.46485e-06	5.21562e-05	-0.253264	chr10	61417971	61425337	uc007ffy.2_Nodal	+	0	chr10	61429330	61430946	uc007ffz.3_DQ716436	-	9331
chr10	61571001	61572000	5.95627e-10	4.97088e-08	-0.264616	chr10	61475832	61582228	uc007fgc.1_Lrrc20	+	0	chr10	61595483	61626385	uc007fgd.2_Npffr1	+	23484
chr10	61812001	61813000	2.23307e-05	0.000190316	0.300066	chr10	61738646	61783864	uc007fgm.1_H2afy2	-	-28138	chr10	61838497	61979108	uc007fgn.1_Col13a1	-	25498
chr10	61857001	61858000	3.49571e-09	1.93578e-07	-0.285178	chr10	61851111	61878392	uc007fgq.2_Col13a1	-	0	chr10	62107655	62111013	uc007fgs.1_2010107G23Rik	-	249656
chr10	61865001	61866000	0.000122273	0.000760073	-0.257741	chr10	61851111	61878392	uc007fgq.2_Col13a1	-	0	chr10	62107655	62111013	uc007fgs.1_2010107G23Rik	-	241656
chr10	61871001	61872000	9.06688e-31	1.15576e-27	0.280216	chr10	61851111	61878392	uc007fgq.2_Col13a1	-	0	chr10	62107655	62111013	uc007fgs.1_2010107G23Rik	-	235656
chr10	61886001	61887000	9.81242e-06	9.82755e-05	-0.565027	chr10	61848731	61978121	uc007fgp.1_Col13a1	-	0	chr10	62107655	62111013	uc007fgs.1_2010107G23Rik	-	220656
chr10	61887001	61888000	2.9953e-06	3.78956e-05	0.442606	chr10	61848731	61978121	uc007fgp.1_Col13a1	-	0	chr10	62107655	62111013	uc007fgs.1_2010107G23Rik	-	219656
chr10	61897001	61898000	5.13582e-07	9.35063e-06	-0.338923	chr10	61848731	61978121	uc007fgp.1_Col13a1	-	0	chr10	62107655	62111013	uc007fgs.1_2010107G23Rik	-	209656
chr10	61909001	61910000	2.74366e-07	5.6987e-06	-0.583791	chr10	61848731	61978121	uc007fgp.1_Col13a1	-	0	chr10	62107655	62111013	uc007fgs.1_2010107G23Rik	-	197656
chr10	61944001	61945000	1.31654e-05	0.000124569	-0.319165	chr10	61848731	61978121	uc007fgp.1_Col13a1	-	0	chr10	62107655	62111013	uc007fgs.1_2010107G23Rik	-	162656
chr10	61959001	61960000	3.26605e-05	0.000258494	0.341208	chr10	61848731	61978121	uc007fgp.1_Col13a1	-	0	chr10	62107655	62111013	uc007fgs.1_2010107G23Rik	-	147656
chr10	62022001	62023000	1.04482e-07	2.67219e-06	0.252951	chr10	61838497	61979108	uc007fgo.1_Col13a1	-	-42894	chr10	62107655	62111013	uc007fgs.1_2010107G23Rik	-	84656
chr10	62127001	62128000	7.39559e-11	9.96006e-09	0.276463	chr10	62107655	62111013	uc007fgt.1_2010107G23Rik	-	-15989	chr10	62133089	62134763	uc007fgu.1_Neurog3	+	5090
chr10	62195001	62196000	1.03522e-09	7.61676e-08	-0.251726	chr10	62185395	62231218	uc007fgw.1_Tspan15	-	0	chr10	62252437	62265990	uc007fgx.2_Tacr2	+	56438
chr10	62197001	62198000	2.36605e-05	0.000199323	0.330242	chr10	62185395	62231218	uc007fgw.1_Tspan15	-	0	chr10	62252437	62265990	uc007fgx.2_Tacr2	+	54438
chr10	62248001	62249000	1.08893e-06	1.69196e-05	0.350417	chr10	62185395	62231218	uc007fgw.1_Tspan15	-	-16784	chr10	62252437	62265990	uc007fgx.2_Tacr2	+	3438
chr10	62261001	62262000	1.01402e-09	7.51049e-08	0.320456	chr10	62252437	62265990	uc007fgx.2_Tacr2	+	0	chr10	62268854	62340421	uc007fgy.2_Hk1	-	6855
chr10	62313001	62314000	5.54617e-06	6.2276e-05	-0.317136	chr10	62296957	62342708	uc007fha.1_Hk1	-	0	chr10	62315385	62375100	uc011xeu.1_Hk1	-	1386
chr10	62336001	62337000	5.97699e-09	2.92465e-07	0.257244	chr10	62315385	62379908	uc011xfa.1_Hk1	-	0	chr10	62340606	62349866	uc029qxk.1_Hk1os	+	3607
chr10	62337001	62338000	5.69741e-06	6.35711e-05	-0.250399	chr10	62315385	62379908	uc011xfa.1_Hk1	-	0	chr10	62340606	62349866	uc029qxk.1_Hk1os	+	2607
chr10	62383001	62384000	7.8116e-08	2.12899e-06	0.318848	chr10	62374964	62379908	uc011xfb.1_Hk1	-	-3094	chr10	62383136	62422457	uc007fhc.1_Hkdc1	-	0
chr10	62405001	62406000	1.19257e-08	4.91691e-07	0.514151	chr10	62383136	62422457	uc007fhc.1_Hkdc1	-	0	chr10	62416382	62422457	uc029qxl.1_Hkdc1	-	10383
chr10	62724001	62725000	0.00036167	0.00184432	0.384163	chr10	62659421	62726099	uc011xfe.1_Stox1	-	0	chr10	62743927	62792368	uc007fja.2_Ccar1	-	18928
chr10	62730001	62731000	8.26177e-10	6.39865e-08	-0.370389	chr10	62659421	62726099	uc011xfe.1_Stox1	-	-3903	chr10	62743927	62792368	uc007fja.2_Ccar1	-	12928
chr10	62890001	62891000	4.30453e-08	1.33929e-06	0.340221	chr10	62804569	62880014	uc011xfg.1_Tet1	-	-9988	chr10	62920632	62929812	uc029qye.1_Slc25a16	+	29633
chr10	63061001	63062000	7.27414e-07	1.22839e-05	0.31303	chr10	63060712	63064128	uc007fjt.1_Pbld1	+	0	chr10	63061557	63077536	uc007fju.1_Pbld1	+	0
chr10	63089001	63090000	0.00364965	0.0123066	0.275408	chr10	63061557	63077536	uc007fju.1_Pbld1	+	-11466	chr10	63100155	63100605	uc007fjv.1_Atoh7	+	10156
chr10	63091001	63092000	0.00163935	0.00639469	0.268238	chr10	63061557	63077536	uc007fju.1_Pbld1	+	-13466	chr10	63100155	63100605	uc007fjv.1_Atoh7	+	8156
chr10	63118001	63119000	1.72674e-05	0.000154999	0.514873	chr10	63115794	63203952	uc007fjy.2_Mypn	-	0	chr10	63194239	63194332	uc033fpw.1_TRNA-Met	-	75240
chr10	63190001	63191000	0.000797447	0.00353415	0.269147	chr10	63115794	63203952	uc007fjy.2_Mypn	-	0	chr10	63194239	63194332	uc033fpw.1_TRNA-Met	-	3240
chr10	63224001	63225000	1.19663e-08	4.9296e-07	-0.331105	chr10	63115794	63203952	uc007fjy.2_Mypn	-	-20050	chr10	63243073	63244148	uc007fjz.1_AK018967	-	18074
chr10	63462001	63463000	1.89944e-06	2.63509e-05	-0.304753	chr10	63457510	65003667	uc007fki.2_Ctnna3	+	0	chr10	63714555	63714577	uc029qyf.1_JA187517	-	251556
chr10	63648001	63649000	2.22202e-07	4.8116e-06	0.327947	chr10	63457510	65003667	uc007fki.2_Ctnna3	+	0	chr10	63714555	63714577	uc029qyf.1_JA187517	-	65556
chr10	63680001	63681000	1.31843e-10	1.55391e-08	-0.37726	chr10	63457510	65003667	uc007fki.2_Ctnna3	+	0	chr10	63714555	63714577	uc029qyf.1_JA187517	-	33556
chr10	63760001	63761000	3.13248e-05	0.000249859	0.369825	chr10	63457510	65003667	uc007fki.2_Ctnna3	+	0	chr10	63821054	65003667	uc007fkj.2_Ctnna3	+	60055
chr10	64817001	64818000	3.39133e-07	6.7338e-06	0.328014	chr10	63821054	65003667	uc007fkj.2_Ctnna3	+	0	chr10	65875787	65908239	uc007fkm.1_AK076946	-	1057788
chr10	65641001	65642000	3.95056e-08	1.24999e-06	-0.666402	chr10	63821054	65003667	uc007fkj.2_Ctnna3	+	-637335	chr10	65875787	65908239	uc007fkm.1_AK076946	-	233788
chr10	65725001	65726000	3.28621e-06	4.08333e-05	-0.672603	chr10	63821054	65003667	uc007fkj.2_Ctnna3	+	-721335	chr10	65875787	65908239	uc007fkm.1_AK076946	-	149788
chr10	66162001	66163000	3.50265e-06	4.29469e-05	-0.328247	chr10	66145295	66179514	uc007fko.1_AK019573	+	0	chr10	66694181	66694212	uc029qyh.1_DQ700676	-	531182
chr10	66713001	66714000	1.05014e-10	1.30698e-08	0.34709	chr10	66697830	66697860	uc007flo.1_DQ727054	-	-15142	chr10	67005074	67041326	uc007flp.1_LOC102634101	+	291075
chr10	66733001	66734000	1.01971e-06	1.60522e-05	-0.288668	chr10	66697830	66697860	uc007flo.1_DQ727054	-	-35142	chr10	67005074	67041326	uc007flp.1_LOC102634101	+	271075
chr10	67083001	67084000	2.26446e-05	0.000192499	-0.544452	chr10	67009188	67096988	uc011xfn.2_Reep3	-	0	chr10	67096124	67226916	uc011xfo.1_Jmjd1c	+	12125
chr10	67565001	67566000	8.88986e-08	2.35114e-06	-0.442612	chr10	67544510	67548955	uc007flz.2_Ado	-	-16047	chr10	67886104	67901337	uc007fma.1_Zfp365	-	320105
chr10	67672001	67673000	1.85677e-69	8.25761e-66	0.409596	chr10	67544510	67548955	uc007flz.2_Ado	-	-123047	chr10	67886104	67901337	uc007fma.1_Zfp365	-	213105
chr10	67788001	67789000	1.67162e-06	2.37953e-05	0.290235	chr10	67544510	67548955	uc007flz.2_Ado	-	-239047	chr10	67886104	67901337	uc007fma.1_Zfp365	-	97105
chr10	67798001	67799000	0.000252122	0.00137066	-0.317364	chr10	67544510	67548955	uc007flz.2_Ado	-	-249047	chr10	67886104	67901337	uc007fma.1_Zfp365	-	87105
chr10	68040001	68041000	0.000204085	0.00115318	0.341424	chr10	67979597	68059740	uc007fme.1_Rtkn2	+	0	chr10	68092915	68098173	uc029qyp.1_Arid5b	-	51916
chr10	68106001	68107000	3.33558e-14	1.48343e-11	-0.724105	chr10	68095592	68278726	uc011xfr.1_Arid5b	-	0	chr10	68118234	68136626	uc007fmi.1_Arid5b	-	11235
chr10	68857001	68858000	0.000575136	0.00270021	0.349043	chr10	68723745	68782654	uc011xfs.1_Tmem26	+	-74348	chr10	69208551	69291784	uc029qyr.1_Rhobtb1	+	350552
chr10	68990001	68991000	4.23671e-09	2.23964e-07	-0.311249	chr10	68723745	68782654	uc011xfs.1_Tmem26	+	-207348	chr10	69208551	69291784	uc029qyr.1_Rhobtb1	+	217552
chr10	69014001	69015000	2.13547e-11	3.69376e-09	-0.481621	chr10	68723745	68782654	uc011xfs.1_Tmem26	+	-231348	chr10	69208551	69291784	uc029qyr.1_Rhobtb1	+	193552
chr10	69131001	69132000	9.23141e-23	7.79521e-20	-0.320874	chr10	68723745	68782654	uc011xfs.1_Tmem26	+	-348348	chr10	69208551	69291784	uc029qyr.1_Rhobtb1	+	76552
chr10	69295001	69296000	1.49101e-06	2.17412e-05	0.352584	chr10	69288851	69291784	uc007fmq.1_Rhobtb1	+	-3218	chr10	69336634	69352912	uc007fmr.1_Cdk1	-	40635
chr10	69310001	69311000	7.89815e-07	1.31261e-05	0.32737	chr10	69288851	69291784	uc007fmq.1_Rhobtb1	+	-18218	chr10	69336634	69352912	uc007fmr.1_Cdk1	-	25635
chr10	69400001	69401000	3.53536e-06	4.32763e-05	-0.323937	chr10	69398772	69602138	uc007fms.1_AK029407	+	0	chr10	69533707	69825080	uc007fmt.1_Ank3	+	132708
chr10	69564001	69565000	1.92106e-09	1.224e-07	-0.324327	chr10	69533707	70027436	uc007fnc.1_Ank3	+	0	chr10	69706473	69822635	uc007fnd.1_Ank3	+	141474
chr10	70114001	70115000	3.75502e-07	7.2889e-06	-0.348273	chr10	70097120	70193200	uc011xfv.1_Ccdc6	+	0	chr10	70204666	70219711	uc007fnp.2_2310015B20Rik	+	89667
chr10	70316001	70317000	0.00407932	0.0134895	0.300492	chr10	70266978	70285951	uc007fnr.1_Slc16a9	+	-30051	chr10	70440667	70500635	uc007fns.2_Fam13c	+	123668
chr10	70521001	70522000	5.01776e-10	4.39088e-08	0.484318	chr10	70440909	70558732	uc007fny.2_Fam13c	+	0	chr10	70557685	70592812	uc011xfx.1_Phyhipl	-	35686
chr10	70869001	70870000	0.000102914	0.000659809	0.295865	chr10	70868643	70923460	uc007foe.1_AK015956	+	0	chr10	70925095	71146860	uc033fpy.1_Bicc1	-	55096
chr10	70870001	70871000	2.6692e-05	0.000219746	-0.466644	chr10	70868643	70923460	uc007foe.1_AK015956	+	0	chr10	70925095	71146860	uc033fpy.1_Bicc1	-	54096
chr10	71157001	71158000	7.80321e-05	0.000526266	0.255876	chr10	70925095	71159634	uc007foh.2_Bicc1	-	0	chr10	71168736	71182040	uc007foj.2_C730027H18Rik	-	10737
chr10	71158001	71159000	3.71952e-07	7.23331e-06	0.378476	chr10	70925095	71159634	uc007foh.2_Bicc1	-	0	chr10	71168736	71182040	uc007foj.2_C730027H18Rik	-	9737
chr10	71175001	71176000	2.51608e-06	3.30351e-05	0.252557	chr10	71170833	71182040	uc007fok.2_C730027H18Rik	-	0	chr10	71225476	71235302	uc007fol.1_Tfam	-	49477
chr10	71194001	71195000	3.00038e-06	3.79389e-05	-0.334871	chr10	71170833	71182040	uc007fok.2_C730027H18Rik	-	-11962	chr10	71225476	71235302	uc007fol.1_Tfam	-	30477
chr10	71199001	71200000	4.85959e-07	8.9635e-06	-0.38055	chr10	71170833	71182040	uc007fok.2_C730027H18Rik	-	-16962	chr10	71225476	71235302	uc007fol.1_Tfam	-	25477
chr10	71295001	71296000	1.39248e-06	2.05862e-05	0.359757	chr10	71254979	71285262	uc007foo.2_Ube2d1	-	-9740	chr10	71310744	71313977	uc007fop.1_AK158974	+	14745
chr10	71399001	71400000	3.88212e-07	7.48839e-06	0.326165	chr10	71381748	71433180	uc007fov.1_AK076771	+	0	chr10	71572648	71572685	uc029qys.1_AB351889	-	172649
chr10	71477001	71478000	4.69633e-07	8.72031e-06	0.353217	chr10	71381748	71433180	uc007fov.1_AK076771	+	-43822	chr10	71572648	71572685	uc029qys.1_AB351889	-	94649
chr10	71783001	71784000	0.0020251	0.00759705	-0.25587	chr10	71572648	71572685	uc029qys.1_AB351889	-	-210317	chr10	71979884	71980690	uc007fox.1_1700049L16Rik	-	195885
chr10	71966001	71967000	1.81687e-06	2.54234e-05	-0.32917	chr10	71572648	71572685	uc029qys.1_AB351889	-	-393317	chr10	71979884	71980690	uc007fox.1_1700049L16Rik	-	12885
chr10	72148001	72149000	0.000132956	0.000813037	-0.269837	chr10	71979884	71980690	uc007fox.1_1700049L16Rik	-	-167312	chr10	72654894	72669165	uc007foy.1_Zwint	+	505895
chr10	72761001	72762000	2.59892e-05	0.000215039	-0.474794	chr10	72654894	72674964	uc007fpa.1_Zwint	+	-86038	chr10	72973302	73086705	uc007fpb.1_A330049N07Rik	-	211303
chr10	73086001	73087000	6.92332e-11	9.47061e-09	-0.323813	chr10	72973302	73086705	uc007fpb.1_A330049N07Rik	-	0	chr10	73099341	73484120	uc007fpc.1_AK080816	+	12342
chr10	73099001	73100000	1.08087e-07	2.74856e-06	0.28572	chr10	72973302	73086705	uc007fpb.1_A330049N07Rik	-	-12297	chr10	73099341	74317264	uc007fpe.1_Pcdh15	+	0
chr10	73100001	73101000	1.19871e-05	0.000115557	0.298613	chr10	73099341	74317264	uc007fpe.1_Pcdh15	+	0	chr10	73821866	74507600	uc007fpf.2_Pcdh15	+	720867
chr10	73196001	73197000	1.49557e-06	2.17899e-05	-0.469749	chr10	73099341	74317264	uc007fpe.1_Pcdh15	+	0	chr10	73821866	74507600	uc007fpf.2_Pcdh15	+	624867
chr10	73926001	73927000	0.00166325	0.00646809	-0.336888	chr10	73821866	74649732	uc011xgh.1_Pcdh15	+	0	chr10	73947027	74634765	uc033fpz.1_Pcdh15	+	20028
chr10	74547001	74548000	1.36514e-05	0.000128345	-0.264609	chr10	73947027	74649732	uc033fqh.1_Pcdh15	+	0	chr10	74624204	74649732	uc029qyt.1_Pcdh15	+	76205
chr10	74554001	74555000	3.35497e-08	1.10015e-06	-0.417493	chr10	73947027	74649732	uc033fqh.1_Pcdh15	+	0	chr10	74624204	74649732	uc029qyt.1_Pcdh15	+	69205
chr10	74712001	74713000	0.000389175	0.00195754	0.327919	chr10	74624204	74649732	uc029qyt.1_Pcdh15	+	-62270	chr10	74957476	75032553	uc011xgj.1_Rtdr1	-	244477
chr10	74959001	74960000	0.00216807	0.00803755	0.383298	chr10	74957476	75032586	uc011xgl.1_Rtdr1	-	0	chr10	74967230	75015877	uc007fpt.1_Gnaz	+	7231
chr10	74963001	74964000	1.57787e-05	0.000144146	0.364532	chr10	74957476	75032586	uc011xgl.1_Rtdr1	-	0	chr10	74967230	75015877	uc007fpt.1_Gnaz	+	3231
chr10	75016001	75017000	4.11608e-10	3.7631e-08	0.40371	chr10	74957476	75032586	uc011xgl.1_Rtdr1	-	0	chr10	75024512	75032586	uc007fpv.1_Rtdr1	-	7513
chr10	75019001	75020000	1.77455e-07	4.05761e-06	0.299319	chr10	74957476	75032586	uc011xgl.1_Rtdr1	-	0	chr10	75024512	75032586	uc007fpv.1_Rtdr1	-	4513
chr10	75033001	75034000	9.63539e-08	2.50984e-06	-0.284328	chr10	75024512	75032586	uc007fpv.1_Rtdr1	-	-416	chr10	75037088	75048788	uc007fpw.1_Rab36	+	3089
chr10	75148001	75149000	3.18938e-07	6.42352e-06	0.254587	chr10	75060895	75184923	uc007fqb.2_Bcr	+	0	chr10	75173970	75184923	uc007fqc.2_Bcr	+	24971
chr10	75165001	75166000	1.10021e-09	7.97737e-08	0.38297	chr10	75060895	75184923	uc007fqb.2_Bcr	+	0	chr10	75173970	75184923	uc007fqc.2_Bcr	+	7971
chr10	75323001	75324000	0.0145139	0.0382037	-0.315355	chr10	75316942	75334788	uc007fqh.1_Adora2a	+	0	chr10	75344471	75353033	uc029qyu.1_BC082775	+	20472
chr10	75413001	75414000	8.32657e-06	8.61647e-05	-0.277528	chr10	75406910	75441679	uc007fqj.2_Upb1	+	0	chr10	75416466	75511286	uc011xgn.1_Gucd1	-	2467
chr10	75519001	75520000	3.39683e-14	1.50419e-11	-0.355376	chr10	75518041	75535440	uc007fqm.1_Snrpd3	+	0	chr10	75550124	75560330	uc029qyw.1_Fam211b	-	30125
chr10	75525001	75526000	1.87927e-11	3.32859e-09	-0.30006	chr10	75518041	75535440	uc007fqm.1_Snrpd3	+	0	chr10	75550124	75560330	uc029qyw.1_Fam211b	-	24125
chr10	75564001	75565000	7.88842e-10	6.16095e-08	0.484152	chr10	75550124	75560330	uc029qyw.1_Fam211b	-	-3672	chr10	75568663	75586182	uc007fqo.2_Ggt1	+	3664
chr10	75571001	75572000	4.64728e-07	8.6428e-06	0.339363	chr10	75568663	75586182	uc007fqo.2_Ggt1	+	0	chr10	75573592	75586182	uc007fqp.1_Ggt1	+	1593
chr10	75613001	75614000	0.0172503	0.0439152	0.274081	chr10	75589380	75616968	uc011xgp.1_Ggt5	+	0	chr10	75636618	75644008	uc007fqt.2_Susd2	-	22619
chr10	75614001	75615000	9.06844e-08	2.39111e-06	-0.303455	chr10	75589380	75616968	uc011xgp.1_Ggt5	+	0	chr10	75636618	75644008	uc007fqt.2_Susd2	-	21619
chr10	75780001	75781000	5.32127e-10	4.56075e-08	0.288642	chr10	75774121	75781414	uc007frb.1_Gstt3	-	0	chr10	75783812	75798584	uc007frc.2_Gstt1	-	2813
chr10	75847001	75848000	5.18989e-05	0.000377235	0.341084	chr10	75841963	75841993	uc007frr.2_DQ557254	+	-5009	chr10	75848290	75848320	uc007frs.1_DQ565717	+	291
chr10	76068001	76069000	0.000159902	0.000944705	0.325461	chr10	76058620	76111018	uc007ftx.1_Slc5a4b	-	0	chr10	76147450	76189265	uc007fty.1_Slc5a4a	+	78451
chr10	76133001	76134000	5.97942e-08	1.72289e-06	-0.37813	chr10	76058620	76111018	uc007ftx.1_Slc5a4b	-	-21984	chr10	76147450	76189265	uc007fty.1_Slc5a4a	+	13451
chr10	76144001	76145000	7.60685e-06	7.99928e-05	0.317255	chr10	76058620	76111018	uc007ftx.1_Slc5a4b	-	-32984	chr10	76147450	76189265	uc007fty.1_Slc5a4a	+	2451
chr10	76203001	76204000	2.54435e-05	0.0002116	0.286199	chr10	76147450	76189265	uc007fty.1_Slc5a4a	+	-13737	chr10	76207221	76237865	uc007ftz.1_Prmt2	-	3222
chr10	76710001	76711000	3.70586e-06	4.49591e-05	0.344113	chr10	76708791	76726044	uc007fux.1_Col6a1	-	0	chr10	76761853	76822797	uc007fuy.2_Pcbp3	-	50854
chr10	76715001	76716000	3.33336e-07	6.64838e-06	0.376014	chr10	76708791	76726044	uc007fux.1_Col6a1	-	0	chr10	76761853	76822797	uc007fuy.2_Pcbp3	-	45854
chr10	76821001	76822000	1.3238e-10	1.5575e-08	-0.391157	chr10	76761853	76961947	uc007fva.2_Pcbp3	-	0	chr10	77011994	77022214	uc007fvb.1_Gm10787	+	189995
chr10	76962001	76963000	1.80965e-11	3.23938e-09	0.314499	chr10	76761853	76961947	uc007fva.2_Pcbp3	-	-55	chr10	77011994	77022214	uc007fvb.1_Gm10787	+	48995
chr10	77015001	77016000	5.50471e-10	4.68387e-08	-0.282389	chr10	77011994	77022214	uc007fvb.1_Gm10787	+	0	chr10	77032738	77050432	uc007fvc.2_Slc19a1	+	16739
chr10	77070001	77071000	2.63867e-06	3.42904e-05	0.314638	chr10	77052178	77166530	uc007fvh.2_Col18a1	-	0	chr10	77095990	77113678	uc011xhb.1_Col18a1	-	24991
chr10	77251001	77252000	2.06345e-10	2.22138e-08	0.268933	chr10	77052178	77166530	uc007fvh.2_Col18a1	-	-84472	chr10	77257772	77259223	uc007fvi.2_Gm10941	-	5773
chr10	77334001	77335000	0.00087755	0.00381771	0.303753	chr10	77321648	77340142	uc011xhc.1_Adarb1	-	0	chr10	77418375	77420939	uc011xhd.1_Gm17769	+	83376
chr10	77450001	77451000	8.41887e-05	0.000559677	-0.289907	chr10	77418375	77420939	uc011xhd.1_Gm17769	+	-29063	chr10	77486654	77515813	uc007fvt.2_Fam207a	-	35655
chr10	77552001	77553000	2.85422e-08	9.69465e-07	-0.309755	chr10	77541931	77565674	uc007fvw.1_Itgb2	+	0	chr10	77581766	77598732	uc007fvx.1_Pttg1ip	+	28767
chr10	77565001	77566000	9.22883e-06	9.36158e-05	0.350106	chr10	77541931	77565674	uc007fvw.1_Itgb2	+	0	chr10	77581766	77598732	uc007fvx.1_Pttg1ip	+	15767
chr10	77687001	77688000	5.26216e-07	9.53727e-06	-0.423638	chr10	77686568	77886769	uc011xhl.2_Tspear	+	0	chr10	77689956	77690757	uc029qzn.1_Gm19402	-	1957
chr10	77690001	77691000	1.85353e-05	0.000163764	0.344187	chr10	77689956	77690757	uc029qzn.1_Gm19402	-	0	chr10	77706586	77706986	uc011xhi.1_Gm10272	+	15587
chr10	77802001	77803000	0.000465167	0.00227017	0.260758	chr10	77686568	77886769	uc011xhl.2_Tspear	+	0	chr10	77814681	77815404	uc029qzr.1_Gm2696	+	11682
chr10	77859001	77860000	1.5782e-07	3.70333e-06	-0.285136	chr10	77686568	77886769	uc011xhl.2_Tspear	+	0	chr10	77861974	77862638	uc011xhn.1_Gm3285	+	1975
chr10	77868001	77869000	1.05701e-06	1.65135e-05	0.278505	chr10	77864622	77886769	uc007fwg.2_Tspear	+	0	chr10	77873093	77881286	uc011xho.1_Tspear	+	4094
chr10	77912001	77913000	3.26084e-05	0.000258143	0.308382	chr10	77907721	77969872	uc007fwl.2_Trpm2	-	0	chr10	77916057	77938142	uc007fwm.1_Trpm2	-	3058
chr10	77933001	77934000	1.76138e-07	4.03735e-06	-0.292819	chr10	77916057	77938142	uc007fwm.1_Trpm2	-	0	chr10	77962789	77969872	uc029qzs.1_Trpm2	-	28790
chr10	78107001	78108000	2.17217e-05	0.000186172	0.355973	chr10	78069367	78079525	uc007fxi.1_Icosl	+	-27477	chr10	78162066	78169768	uc007fxj.1_D10Jhu81e	-	54067
chr10	78118001	78119000	7.38236e-08	2.03846e-06	0.265756	chr10	78069367	78079525	uc007fxi.1_Icosl	+	-38477	chr10	78162066	78169768	uc007fxj.1_D10Jhu81e	-	43067
chr10	78197001	78198000	4.3207e-05	0.000324572	0.256552	chr10	78186725	78244642	uc007fxm.1_Trappc10	-	0	chr10	78202197	78209234	uc007fxn.1_Trappc10	-	4198
chr10	78388001	78389000	0.00230875	0.00846345	-0.277274	chr10	78383644	78383717	uc033fqp.1_TRNA-Ala	-	-4285	chr10	78400361	78413043	uc007fxs.1_Rrp1	-	11362
chr10	78642001	78643000	8.71955e-05	0.000575783	0.282552	chr10	78611668	78618074	uc007fyc.2_Olfr1357	-	-23928	chr10	78711994	78718293	uc007fyd.2_Casp14	-	68995
chr10	78845001	78846000	0.00050028	0.00240905	0.307582	chr10	78780495	78814825	uc007fyg.2_Slc1a6	+	-30177	chr10	78846950	78847913	uc007fyh.1_Olfr1356	-	951
chr10	79311001	79312000	0.000432691	0.00213738	0.269238	chr10	79247776	79294535	uc007fyp.1_Vmn2r81	+	-16467	chr10	79353795	79353823	uc029qzw.1_AB351889	-	41796
chr10	79440001	79441000	2.03749e-05	0.000176948	0.423972	chr10	79356590	79396766	uc009vaa.1_Vmn2r82	+	-43236	chr10	79468957	79492154	uc009vab.1_Vmn2r83	+	27958
chr10	79453001	79454000	0.000521836	0.00249436	-0.278546	chr10	79356590	79396766	uc009vaa.1_Vmn2r82	+	-56236	chr10	79468957	79492154	uc009vab.1_Vmn2r83	+	14958
chr10	79608001	79609000	0.00205207	0.00767849	0.29704	chr10	79606853	79614025	uc007fzc.1_C2cd4c	-	0	chr10	79612051	79613311	uc033fqv.1_C2cd4c	-	3052
chr10	79622001	79623000	5.40804e-05	0.000390187	0.367737	chr10	79617937	79637918	uc007fzd.2_Shc2	-	0	chr10	79639525	79645738	uc007fze.1_Odf3l2	-	16526
chr10	79626001	79627000	0.000599608	0.00279376	-0.280377	chr10	79617937	79637918	uc007fzd.2_Shc2	-	0	chr10	79639525	79645738	uc007fze.1_Odf3l2	-	12526
chr10	79671001	79672000	2.36981e-08	8.36297e-07	-0.313372	chr10	79669409	79676126	uc007fzh.1_Tpgs1	+	0	chr10	79682194	79688398	uc007fzi.1_Cdc34	+	10195
chr10	79745001	79746000	6.8196e-07	1.16669e-05	-0.42442	chr10	79736124	79746581	uc011xhz.1_Polrmt	-	0	chr10	79747708	79747728	uc033fqw.1_Mir7669	+	1709
chr10	79754001	79755000	0.000294581	0.00155704	0.285123	chr10	79697304	80369637	uc029qzy.1_Bc1	-	0	chr10	79755118	79756961	uc007fzp.1_Fgf22	+	119
chr10	79780001	79781000	2.62995e-09	1.55305e-07	0.406534	chr10	79777273	79782630	uc007fzs.2_Fstl3	+	0	chr10	79780580	79782630	uc007fzt.2_Fstl3	+	0
chr10	79787001	79788000	2.20268e-08	7.89573e-07	0.32112	chr10	79781473	79789042	uc007fzu.1_Prss57	-	0	chr10	79793571	79817398	uc007fzv.2_Palm	+	5572
chr10	79812001	79813000	2.01077e-06	2.75965e-05	0.268544	chr10	79793571	79820896	uc007fzx.2_Palm	+	0	chr10	79821020	79830452	uc007fzy.1_Misp	+	8021
chr10	79865001	79866000	2.15199e-05	0.000184759	-0.316307	chr10	79864780	79874634	uc007gag.1_BC005764	-	0	chr10	79879666	79883172	uc007gah.1_Prtn3	+	13667
chr10	79888001	79889000	1.20598e-06	1.83746e-05	0.270856	chr10	79886311	79888216	uc007gai.1_Elane	+	0	chr10	79890852	79892656	uc007gaj.2_Cfd	+	1853
chr10	79915001	79916000	0.000229243	0.00126784	0.259274	chr10	79910052	79916930	uc007gan.1_R3hdm4	-	0	chr10	79916970	79922022	uc011xih.1_Kiss1r	+	971
chr10	79918001	79919000	8.24292e-05	0.000550118	0.277571	chr10	79916970	79922272	uc007gao.2_Kiss1r	+	0	chr10	79927042	79955018	uc007gap.2_Arid3a	+	8043
chr10	79922001	79923000	3.8127e-05	0.000293011	-0.372675	chr10	79916970	79922272	uc007gao.2_Kiss1r	+	0	chr10	79927042	79955018	uc007gap.2_Arid3a	+	4043
chr10	79937001	79938000	1.02731e-06	1.61503e-05	-0.338918	chr10	79927340	79955018	uc007gaq.2_Arid3a	+	0	chr10	79946278	79955018	uc007gar.2_Arid3a	+	8279
chr10	79958001	79959000	3.04206e-08	1.02148e-06	-0.368169	chr10	79697304	80369637	uc029qzy.1_Bc1	-	0	chr10	79960151	79961704	uc029rab.1_Wdr18	+	1152
chr10	80184001	80185000	2.96891e-07	6.07031e-06	-0.270848	chr10	80179481	80190010	uc007gcg.2_Efna2	+	0	chr10	80226597	80245144	uc007gch.1_Mum1	+	41598
chr10	80198001	80199000	1.1163e-06	1.72633e-05	0.343157	chr10	79697304	80369637	uc029qzy.1_Bc1	-	0	chr10	80226597	80245144	uc007gch.1_Mum1	+	27598
chr10	80206001	80207000	1.33862e-05	0.000126312	-0.313182	chr10	79697304	80369637	uc029qzy.1_Bc1	-	0	chr10	80226597	80245144	uc007gch.1_Mum1	+	19598
chr10	80247001	80248000	5.5857e-13	1.80883e-10	-0.650864	chr10	79697304	80369637	uc029qzy.1_Bc1	-	0	chr10	80248963	80249036	uc033fqz.1_TRNA-Phe	-	964
chr10	80266001	80267000	2.67934e-09	1.57474e-07	0.53789	chr10	80264990	80288413	uc011xip.1_Dazap1	+	0	chr10	80278163	80278232	uc033frb.1_Mir6911	+	11164
chr10	80285001	80286000	0.000128892	0.000792785	-0.325039	chr10	80264990	80288413	uc011xip.1_Dazap1	+	0	chr10	80292430	80294114	uc007gcn.2_Rps15	+	6431
chr10	80298001	80299000	8.89727e-07	1.44073e-05	0.281365	chr10	79697304	80369637	uc029qzy.1_Bc1	-	0	chr10	80301819	80303355	uc007gco.1_Apc2	+	2820
chr10	80355001	80356000	0.000985441	0.00419935	-0.260247	chr10	79697304	80369637	uc029qzy.1_Bc1	-	0	chr10	80356458	80365489	uc007gcx.2_Plk5	+	459
chr10	80470001	80471000	2.8875e-06	3.68234e-05	-0.370615	chr10	80409164	80433653	uc007gdm.2_Tcf3	-	-36349	chr10	80494905	80517260	uc007gdn.1_Onecut3	+	23906
chr10	80478001	80479000	0.000902839	0.00390751	0.27622	chr10	80409164	80433653	uc007gdm.2_Tcf3	-	-44349	chr10	80494905	80517260	uc007gdn.1_Onecut3	+	15906
chr10	80560001	80561000	5.09888e-10	4.4347e-08	0.419433	chr10	80540925	80561560	uc007gds.1_Rexo1	-	0	chr10	80567120	80577296	uc007gdt.1_Klf16	-	6121
chr10	80655001	80656000	2.06766e-10	2.22471e-08	0.278933	chr10	80642616	80657071	uc011xit.1_Btbd2	-	0	chr10	80665329	80672015	uc007gee.2_Mknk2	-	9330
chr10	80695001	80696000	1.20976e-09	8.5884e-08	0.464878	chr10	80685252	80701820	uc007geh.1_Mob3a	-	0	chr10	80699829	80701820	uc007gei.1_Mob3a	-	3830
chr10	80708001	80709000	9.77216e-05	0.000632252	0.315099	chr10	80706977	80742211	uc007gek.1_Ap3d1	-	0	chr10	80755205	80792773	uc033frf.1_Dot1l	+	46206
chr10	80780001	80781000	5.92909e-10	4.95853e-08	-0.448725	chr10	80777555	80794347	uc007gen.1_Dot1l	+	0	chr10	80788514	80794347	uc007geo.1_Dot1l	+	7515
chr10	80828001	80829000	4.52167e-07	8.45452e-06	-0.366386	chr10	80826655	80829290	uc033frg.1_Oaz1	+	0	chr10	80828796	80828870	uc011xiz.1_Mir1982	+	0
chr10	80837001	80838000	9.63754e-06	9.69509e-05	-0.277296	chr10	80832800	80844039	uc007gey.3_Lingo3	-	0	chr10	80852820	80855209	uc007gez.1_Lsm7	-	14821
chr10	80853001	80854000	5.83633e-07	1.03318e-05	0.283902	chr10	80852824	80855209	uc007gfa.1_Lsm7	-	0	chr10	80855274	80866081	uc007gfb.1_Sppl2b	+	1275
chr10	80893001	80894000	0.000680807	0.00310255	0.263384	chr10	80879815	80899494	uc011xja.1_Tmprss9	+	0	chr10	80899449	80900969	uc007gfi.2_Timm13	-	5450
chr10	80898001	80899000	0.000370231	0.00188002	0.326924	chr10	80879815	80899494	uc011xja.1_Tmprss9	+	0	chr10	80899449	80900969	uc007gfi.2_Timm13	-	450
chr10	81020001	81021000	2.35052e-07	5.03645e-06	-0.421443	chr10	81019589	81025377	uc007gfo.1_Diras1	-	0	chr10	81021818	81022415	uc033fri.1_Diras1	-	819
chr10	81055001	81056000	7.24526e-06	7.69546e-05	-0.311472	chr10	81044072	81060154	uc007gfu.1_Sgta	-	0	chr10	81070082	81082360	uc007gfv.2_Thop1	+	14083
chr10	81140001	81141000	0.000150035	0.000896521	0.32607	chr10	81138033	81151657	uc007ggb.1_Zbtb7a	+	0	chr10	81153965	81167720	uc007ggc.3_Pias4	-	12966
chr10	81179001	81180000	6.53566e-228	4.3599e-223	-0.259619	chr10	81178960	81179013	uc011xjd.1_Snord37	+	0	chr10	81183006	81192182	uc007ggg.2_Dapk3	+	3007
chr10	81214001	81215000	0.0051852	0.0164196	0.272808	chr10	81204512	81230779	uc007ggo.1_Atcay	-	0	chr10	81233162	81237591	uc007ggp.2_Zfr2	+	18163
chr10	81261001	81262000	4.78486e-11	7.05143e-09	-0.435459	chr10	81257298	81262981	uc007ggx.2_Matk	+	0	chr10	81264721	81266926	uc007ggy.1_Mrpl54	-	2722
chr10	81322001	81323000	1.84404e-08	6.88644e-07	0.251823	chr10	81321102	81326251	uc007ghf.2_Cactin	+	0	chr10	81328702	81335174	uc007ghg.2_Tbxa2r	+	5703
chr10	81383001	81384000	0.000569151	0.00267723	0.258893	chr10	81366878	81378370	uc011xjh.1_Fzr1	-	-4632	chr10	81384427	81388352	uc007ghu.2_Dohh	+	428
chr10	81433001	81434000	2.89127e-08	9.79391e-07	0.25292	chr10	81396190	81430794	uc007gia.1_Nfic	-	-2208	chr10	81459227	81473131	uc007gib.2_Celf5	-	25228
chr10	81459001	81460000	1.84011e-13	6.69558e-11	-0.318951	chr10	81396190	81430794	uc007gia.1_Nfic	-	-28208	chr10	81459227	81482709	uc007gie.2_Celf5	-	0
chr10	81460001	81461000	5.95062e-10	4.96965e-08	-0.505297	chr10	81459227	81482709	uc007gie.2_Celf5	-	0	chr10	81467506	81473378	uc007gif.1_Celf5	-	6507
chr10	81523001	81524000	1.73868e-06	2.4537e-05	-0.296488	chr10	81502313	81524225	uc007gij.1_Gna15	-	0	chr10	81528731	81545046	uc007gil.1_Gna11	-	4732
chr10	81543001	81544000	1.12475e-06	1.73577e-05	0.550493	chr10	81528731	81545046	uc007gil.1_Gna11	-	0	chr10	81559443	81566371	uc007gim.2_Aes	+	15444
chr10	81644001	81645000	3.51967e-06	4.3108e-05	0.287131	chr10	81640891	81645967	uc007gjd.1_Ankrd24	+	0	chr10	81649068	81667361	uc007gje.1_Gm10778	+	4069
chr10	82023001	82024000	3.91619e-06	4.69558e-05	0.362244	chr10	81901910	81930480	uc011xjn.1_Zfp781	-	-92522	chr10	82044643	82048038	uc007gji.1_AK136722	-	20644
chr10	82295001	82296000	0.000235474	0.00129592	0.387591	chr10	82224855	82241275	uc007gjm.3_Zfp938	-	-53727	chr10	82354254	82400846	uc007gjn.1_Mif1	+	58255
chr10	82471001	82472000	8.16357e-05	0.000545894	-0.35563	chr10	82354254	82400846	uc007gjn.1_Mif1	+	-70156	chr10	82486532	82492618	uc007gjo.2_Gm1553	-	14533
chr10	82515001	82516000	0.0165396	0.0424592	0.328918	chr10	82486532	82492618	uc007gjo.2_Gm1553	-	-22384	chr10	82619850	82623228	uc007gjp.2_1190007I07Rik	-	103851
chr10	82596001	82597000	1.45222e-07	3.46732e-06	0.559797	chr10	82486532	82492618	uc007gjo.2_Gm1553	-	-103384	chr10	82619850	82623228	uc007gjp.2_1190007I07Rik	-	22851
chr10	82645001	82646000	2.12865e-12	5.58324e-10	-0.335411	chr10	82629837	82650494	uc011xjr.2_Tdg	+	0	chr10	82650432	82690650	uc007gjs.1_Glt8d2	-	4433
chr10	82711001	82712000	4.89115e-08	1.47329e-06	-0.331527	chr10	82699006	82741392	uc007gjt.1_Hcfc2	+	0	chr10	82728252	82739474	uc007gju.1_Hcfc2	+	16253
chr10	82854001	82855000	2.26949e-07	4.89534e-06	-0.585417	chr10	82833950	82897724	uc007gjy.1_Txnrd1	+	0	chr10	82859205	82897724	uc007gjz.1_Txnrd1	+	4206
chr10	82874001	82875000	0.00105042	0.00442586	0.295227	chr10	82860340	82897724	uc007gkb.1_Txnrd1	+	0	chr10	82874604	82877385	uc007gkd.1_Txnrd1	+	0
chr10	82999001	83000000	4.10646e-09	2.18685e-07	-0.255773	chr10	82985748	83195891	uc011xjs.1_Chst11	+	0	chr10	83231138	83337817	uc007gkf.1_Slc41a2	-	231139
chr10	83141001	83142000	3.90469e-11	5.97005e-09	-0.411992	chr10	82985748	83195891	uc011xjs.1_Chst11	+	0	chr10	83231138	83337817	uc007gkf.1_Slc41a2	-	89139
chr10	83161001	83162000	9.58597e-05	0.000622097	0.26089	chr10	82985748	83195891	uc011xjs.1_Chst11	+	0	chr10	83231138	83337817	uc007gkf.1_Slc41a2	-	69139
chr10	83181001	83182000	4.59358e-09	2.37977e-07	-0.371085	chr10	82985748	83195891	uc011xjs.1_Chst11	+	0	chr10	83231138	83337817	uc007gkf.1_Slc41a2	-	49139
chr10	83523001	83524000	0.00532697	0.0167791	-0.286247	chr10	83494741	83534140	uc007gki.2_Aldh1l2	-	0	chr10	83543940	83596473	uc007gkj.1_A230046K03Rik	+	19941
chr10	83635001	83636000	4.32357e-06	5.07756e-05	0.337214	chr10	83600033	83648664	uc007gkk.1_Appl2	-	0	chr10	83722864	83762762	uc007gkm.2_1500009L16Rik	+	86865
chr10	83717001	83718000	0.0117327	0.0320841	0.262724	chr10	83600033	83648664	uc007gkk.1_Appl2	-	-68338	chr10	83722864	83762762	uc007gkm.2_1500009L16Rik	+	4865
chr10	83726001	83727000	9.82129e-07	1.55857e-05	0.266958	chr10	83722864	83762762	uc007gkm.2_1500009L16Rik	+	0	chr10	83992727	84004860	uc007gkn.1_AK082148	-	265728
chr10	83736001	83737000	5.40344e-13	1.76121e-10	-0.36709	chr10	83722864	83762762	uc007gkm.2_1500009L16Rik	+	0	chr10	83992727	84004860	uc007gkn.1_AK082148	-	255728
chr10	83954001	83955000	0.00184184	0.0070351	-0.312745	chr10	83722864	83762762	uc007gkm.2_1500009L16Rik	+	-191240	chr10	83992727	84004860	uc007gkn.1_AK082148	-	37728
chr10	83961001	83962000	1.25152e-06	1.89401e-05	-0.414872	chr10	83722864	83762762	uc007gkm.2_1500009L16Rik	+	-198240	chr10	83992727	84004860	uc007gkn.1_AK082148	-	30728
chr10	83982001	83983000	1.86494e-08	6.93987e-07	-0.320325	chr10	83722864	83762762	uc007gkm.2_1500009L16Rik	+	-219240	chr10	83992727	84004860	uc007gkn.1_AK082148	-	9728
chr10	84055001	84056000	0.000359056	0.00183344	0.363082	chr10	83992727	84004860	uc007gkn.1_AK082148	-	-50142	chr10	84371318	84440471	uc007gko.1_Nuak1	-	315319
chr10	84056001	84057000	8.36139e-06	8.64466e-05	0.659786	chr10	83992727	84004860	uc007gkn.1_AK082148	-	-51142	chr10	84371318	84440471	uc007gko.1_Nuak1	-	314319
chr10	84380001	84381000	1.20252e-10	1.44974e-08	-0.252331	chr10	84371318	84440471	uc007gko.1_Nuak1	-	0	chr10	84518044	84523270	uc007gkp.1_AK054042	+	137045
chr10	84388001	84389000	5.4522e-08	1.60513e-06	-0.343636	chr10	84371318	84440471	uc007gko.1_Nuak1	-	0	chr10	84518044	84523270	uc007gkp.1_AK054042	+	129045
chr10	84618001	84619000	3.03153e-10	2.98015e-08	-0.336899	chr10	84576946	84614355	uc007gks.1_Tcp11l2	+	-3647	chr10	84622436	84656191	uc007gkt.1_Polr3b	+	3437
chr10	84621001	84622000	5.97219e-05	0.000423521	-0.331808	chr10	84576946	84614355	uc007gks.1_Tcp11l2	+	-6647	chr10	84622436	84656191	uc007gkt.1_Polr3b	+	437
chr10	84677001	84678000	4.17167e-06	4.93626e-05	-0.527704	chr10	84622436	84727178	uc007gku.1_Polr3b	+	0	chr10	84756047	84906538	uc007gkv.1_Rfx4	+	78048
chr10	84743001	84744000	0.00796029	0.023349	0.258825	chr10	84622436	84727178	uc007gku.1_Polr3b	+	-15824	chr10	84756047	84906538	uc007gkv.1_Rfx4	+	12048
chr10	85232001	85233000	6.61612e-11	9.13152e-09	-0.300254	chr10	85220941	85266392	uc007glf.1_AK165297	-	0	chr10	85386813	85660292	uc007glg.2_Btbd11	+	153814
chr10	85271001	85272000	7.66885e-09	3.52169e-07	0.543591	chr10	85220941	85266392	uc007glf.1_AK165297	-	-4610	chr10	85386813	85660292	uc007glg.2_Btbd11	+	114814
chr10	85325001	85326000	0.00012164	0.000756858	0.277207	chr10	85220941	85266392	uc007glf.1_AK165297	-	-58610	chr10	85386813	85660292	uc007glg.2_Btbd11	+	60814
chr10	85326001	85327000	7.19668e-09	3.36979e-07	0.717301	chr10	85220941	85266392	uc007glf.1_AK165297	-	-59610	chr10	85386813	85660292	uc007glg.2_Btbd11	+	59814
chr10	85986001	85987000	4.48595e-07	8.40199e-06	-0.387756	chr10	85959690	86011860	uc007gnj.2_Bpifc	-	0	chr10	86021928	86048328	uc007gnk.1_Fbxo7	+	34929
chr10	86048001	86049000	5.09483e-05	0.000371427	0.335338	chr10	86022188	86048328	uc007gnm.1_Fbxo7	+	0	chr10	86048745	86498896	uc007gnn.2_Syn3	-	0
chr10	86079001	86080000	2.72105e-06	3.51441e-05	0.266305	chr10	86070501	86491897	uc007gnp.1_Syn3	-	0	chr10	86095853	86113585	uc007gnq.2_4930486F22Rik	+	15854
chr10	86366001	86367000	7.28953e-05	0.000497983	-0.262667	chr10	86347773	86498896	uc007gnu.2_Syn3	-	0	chr10	86570059	86570129	uc007gnv.2_DQ697233	-	203060
chr10	86555001	86556000	3.00743e-08	1.01155e-06	-0.527321	chr10	86347773	86498896	uc007gnu.2_Syn3	-	-56106	chr10	86570059	86570129	uc007gnv.2_DQ697233	-	14060
chr10	86556001	86557000	0.00011615	0.000729135	-0.270805	chr10	86347773	86498896	uc007gnu.2_Syn3	-	-57106	chr10	86570059	86570129	uc007gnv.2_DQ697233	-	13060
chr10	87003001	87004000	1.2014e-10	1.44936e-08	0.355524	chr10	86962670	87007942	uc011xlc.1_Stab2	-	0	chr10	87058045	87230599	uc011xld.1_1700113H08Rik	+	54046
chr10	87082001	87083000	1.90447e-07	4.28302e-06	-0.254961	chr10	87058045	87230599	uc011xld.1_1700113H08Rik	+	0	chr10	87205978	87230599	uc007gqq.2_1700113H08Rik	+	122979
chr10	87380001	87381000	0.00522788	0.0165289	0.318523	chr10	87230759	87239240	uc007gqr.1_AK016129	+	-140762	chr10	87491040	87493660	uc007gqs.1_Ascl1	-	110041
chr10	87447001	87448000	1.89537e-06	2.63031e-05	0.30346	chr10	87230759	87239240	uc007gqr.1_AK016129	+	-207762	chr10	87491040	87493660	uc007gqs.1_Ascl1	-	43041
chr10	87606001	87607000	0.0122681	0.0332691	0.260799	chr10	87521794	87584137	uc007gqt.2_Pah	+	-21865	chr10	87826378	87828362	uc007gqu.1_ENSMUSG00000058934	-	219379
chr10	88405001	88406000	0.000215782	0.00120619	0.313189	chr10	88379411	88447329	uc011xlg.1_Gnptab	+	0	chr10	88459586	88473236	uc007grm.2_Sycp3	+	53587
chr10	88444001	88445000	2.07231e-11	3.59695e-09	-0.366547	chr10	88379411	88447329	uc011xlg.1_Gnptab	+	0	chr10	88459586	88473236	uc007grm.2_Sycp3	+	14587
chr10	88497001	88498000	5.00797e-08	1.50148e-06	0.524533	chr10	88487063	88503970	uc007grs.2_Chpt1	-	0	chr10	88518278	88605152	uc007grt.3_Mybpc1	-	20279
chr10	88572001	88573000	4.0785e-06	4.85182e-05	0.348101	chr10	88558570	88605152	uc029rei.1_Mybpc1	-	0	chr10	88675269	88683023	uc007grv.2_Spic	-	102270
chr10	88719001	88720000	6.473e-05	0.000452173	0.27101	chr10	88675269	88683023	uc011xli.1_Spic	-	-35979	chr10	88729540	88731101	uc011xlj.1_Gm4925	-	9541
chr10	88750001	88751000	2.93957e-08	9.93735e-07	0.328252	chr10	88746606	88826814	uc007grx.2_Utp20	-	0	chr10	88885991	88929515	uc007grz.1_Slc5a8	+	134992
chr10	88886001	88887000	4.72528e-07	8.75774e-06	0.397828	chr10	88885991	88929515	uc007grz.1_Slc5a8	+	0	chr10	88948993	89257790	uc007gsa.1_Ano4	-	61994
chr10	89000001	89001000	1.72838e-05	0.000155132	0.261543	chr10	88948993	89257790	uc033frt.1_Ano4	-	0	chr10	89015603	89257790	uc007gsb.1_Ano4	-	14604
chr10	89291001	89292000	5.48064e-05	0.00039433	0.303815	chr10	89015603	89257790	uc007gsb.1_Ano4	-	-33212	chr10	89335559	89344762	uc011xlk.1_AK052801	-	43560
chr10	89389001	89390000	1.06711e-09	7.792e-08	0.810054	chr10	89335559	89344762	uc011xlk.1_AK052801	-	-44240	chr10	89408822	89443967	uc007gsd.1_Gas2l3	-	18823
chr10	89422001	89423000	3.63287e-14	1.59439e-11	-0.375499	chr10	89408822	89443967	uc033fru.1_Gas2l3	-	0	chr10	89423257	89423303	uc029rej.1_AB350106	-	258
chr10	89820001	89821000	4.92086e-09	2.50905e-07	-0.294632	chr10	89806623	89819869	uc007gsw.2_Uhrf1bp1l	+	-133	chr10	89873508	90972984	uc033frv.1_Anks1b	+	52509
chr10	89884001	89885000	6.47682e-09	3.10912e-07	0.270968	chr10	89873508	90972984	uc033frv.1_Anks1b	+	0	chr10	89915493	89915531	uc029rek.1_AB349811	+	30494
chr10	89885001	89886000	5.76294e-06	6.41663e-05	-0.337862	chr10	89873508	90972984	uc033frv.1_Anks1b	+	0	chr10	89915493	89915531	uc029rek.1_AB349811	+	29494
chr10	89988001	89989000	5.94636e-05	0.000421938	0.282387	chr10	89873508	90972984	uc033frv.1_Anks1b	+	0	chr10	90472745	90472769	uc029rel.1_AB335791	+	483746
chr10	90132001	90133000	1.23004e-09	8.68617e-08	-0.324387	chr10	89873508	90972984	uc033frv.1_Anks1b	+	0	chr10	90472745	90472769	uc029rel.1_AB335791	+	339746
chr10	90204001	90205000	0.000605129	0.00281459	-0.287876	chr10	89873508	90972984	uc033frv.1_Anks1b	+	0	chr10	90472745	90472769	uc029rel.1_AB335791	+	267746
chr10	90513001	90514000	0.00168242	0.00653112	-0.319718	chr10	89873508	90972984	uc033frv.1_Anks1b	+	0	chr10	90575726	90972984	uc033frw.1_Anks1b	+	61727
chr10	90640001	90641000	1.89618e-06	2.63124e-05	-0.404037	chr10	90577088	90972984	uc033fsd.1_Anks1b	+	0	chr10	90829842	90923602	uc007gtd.1_Anks1b	+	188843
chr10	90688001	90689000	8.57948e-05	0.000568221	-0.271979	chr10	90577088	90972984	uc033fsd.1_Anks1b	+	0	chr10	90829842	90923602	uc007gtd.1_Anks1b	+	140843
chr10	90696001	90697000	1.48587e-05	0.000137468	0.285549	chr10	90577088	90972984	uc033fsd.1_Anks1b	+	0	chr10	90829842	90923602	uc007gtd.1_Anks1b	+	132843
chr10	90718001	90719000	2.04784e-09	1.27808e-07	-0.334087	chr10	90577088	90972984	uc033fsd.1_Anks1b	+	0	chr10	90829842	90923602	uc007gtd.1_Anks1b	+	110843
chr10	90796001	90797000	0.000138506	0.000840664	-0.262017	chr10	90577088	90972984	uc033fsd.1_Anks1b	+	0	chr10	90829842	90923602	uc007gtd.1_Anks1b	+	32843
chr10	90843001	90844000	1.07294e-09	7.82527e-08	0.268805	chr10	90829842	90923602	uc007gtd.1_Anks1b	+	0	chr10	90989310	91082743	uc007gtg.1_Apaf1	-	145311
chr10	91195001	91196000	0.000331857	0.00171741	0.293816	chr10	91182096	91182168	uc033fsf.1_TRNA-Asp	-	-12834	chr10	92072085	92072185	uc007gty.2_Mir135a-2	-	876086
chr10	91249001	91250000	1.3951e-06	2.06141e-05	0.359417	chr10	91182096	91182168	uc033fsf.1_TRNA-Asp	-	-66834	chr10	92072085	92072185	uc007gty.2_Mir135a-2	-	822086
chr10	91305001	91306000	0.0019662	0.00742215	0.323064	chr10	91182096	91182168	uc033fsf.1_TRNA-Asp	-	-122834	chr10	92072085	92072185	uc007gty.2_Mir135a-2	-	766086
chr10	91391001	91392000	0.00022685	0.001257	-0.294712	chr10	91182096	91182168	uc033fsf.1_TRNA-Asp	-	-208834	chr10	92072085	92072185	uc007gty.2_Mir135a-2	-	680086
chr10	91429001	91430000	1.16139e-06	1.78159e-05	-0.290484	chr10	91182096	91182168	uc033fsf.1_TRNA-Asp	-	-246834	chr10	92072085	92072185	uc007gty.2_Mir135a-2	-	642086
chr10	91517001	91518000	4.59895e-09	2.38193e-07	0.331139	chr10	91182096	91182168	uc033fsf.1_TRNA-Asp	-	-334834	chr10	92072085	92072185	uc007gty.2_Mir135a-2	-	554086
chr10	91575001	91576000	1.12758e-08	4.7077e-07	0.26162	chr10	91182096	91182168	uc033fsf.1_TRNA-Asp	-	-392834	chr10	92072085	92072185	uc007gty.2_Mir135a-2	-	496086
chr10	91630001	91631000	0.000151273	0.000902528	0.26546	chr10	91182096	91182168	uc033fsf.1_TRNA-Asp	-	-447834	chr10	92072085	92072185	uc007gty.2_Mir135a-2	-	441086
chr10	91795001	91796000	0.000848476	0.00371481	0.262874	chr10	91182096	91182168	uc033fsf.1_TRNA-Asp	-	-612834	chr10	92072085	92072185	uc007gty.2_Mir135a-2	-	276086
chr10	91912001	91913000	0.000235528	0.00129604	-0.341297	chr10	91182096	91182168	uc033fsf.1_TRNA-Asp	-	-729834	chr10	92072085	92072185	uc007gty.2_Mir135a-2	-	159086
chr10	92162001	92163000	2.64065e-06	3.43095e-05	0.407565	chr10	92081745	92165178	uc007gtz.2_Rmst	-	0	chr10	92162147	92165178	uc007guc.2_Rmst	-	0
chr10	92538001	92539000	8.68347e-15	4.3229e-12	-0.697997	chr10	92171300	92375373	uc029rem.1_Gm20757	-	-162629	chr10	92684744	92722418	uc007gud.2_Nedd1	-	145745
chr10	92639001	92640000	5.58991e-11	7.93966e-09	0.395702	chr10	92171300	92375373	uc029rem.1_Gm20757	-	-263629	chr10	92684744	92722418	uc007gud.2_Nedd1	-	44745
chr10	92649001	92650000	1.04827e-06	1.6405e-05	0.306334	chr10	92171300	92375373	uc029rem.1_Gm20757	-	-273629	chr10	92684744	92722418	uc007gud.2_Nedd1	-	34745
chr10	92793001	92794000	8.82684e-06	9.02694e-05	0.315098	chr10	92691515	92722418	uc007gue.2_Nedd1	-	-70584	chr10	92796756	92836346	uc007guf.1_BC065048	-	2757
chr10	92937001	92938000	4.07215e-05	0.000308939	0.376946	chr10	92897459	92940289	uc007gug.1_4930485B16Rik	-	0	chr10	93016534	93045119	uc007guh.1_AK039960	-	78535
chr10	93081001	93082000	1.81067e-05	0.000160709	0.391011	chr10	93061268	93081618	uc007guj.1_4930485B16Rik	-	0	chr10	93160875	93225368	uc007guk.2_Cdk17	+	78876
chr10	93087001	93088000	6.82382e-06	7.34883e-05	0.447455	chr10	93061268	93081618	uc007guj.1_4930485B16Rik	-	-5384	chr10	93160875	93225368	uc007guk.2_Cdk17	+	72876
chr10	93156001	93157000	9.9654e-07	1.57582e-05	0.387718	chr10	93061268	93081618	uc007guj.1_4930485B16Rik	-	-74384	chr10	93160875	93225368	uc007guk.2_Cdk17	+	3876
chr10	93370001	93371000	3.66362e-06	4.45521e-05	-0.371529	chr10	93336231	93348879	uc007gup.2_Gm17745	+	-21123	chr10	93452977	93453049	uc033fsg.1_TRNA-Asp	-	81978
chr10	93584001	93585000	5.40366e-10	4.62147e-08	-0.556344	chr10	93583028	93589658	uc007guw.2_Snrpf	-	0	chr10	93589412	93605245	uc029ren.1_4933408J17Rik	+	4413
chr10	94431001	94432000	0.000203444	0.0011504	-0.254256	chr10	94311948	94430871	uc007gvs.1_AK038827	+	-131	chr10	94514856	94590954	uc007gvt.2_Tmcc3	+	82857
chr10	94849001	94850000	3.58167e-05	0.000278409	0.281657	chr10	94790865	94944578	uc007gvz.3_Plxnc1	-	0	chr10	95174745	95322965	uc007gwa.1_Cradd	-	324746
chr10	94866001	94867000	1.33227e-06	1.98884e-05	0.771832	chr10	94790865	94944578	uc007gvz.3_Plxnc1	-	0	chr10	95174745	95322965	uc007gwa.1_Cradd	-	307746
chr10	94953001	94954000	1.7651e-08	6.65122e-07	0.269662	chr10	94790865	94944578	uc007gvz.3_Plxnc1	-	-8424	chr10	95174745	95322965	uc007gwa.1_Cradd	-	220746
chr10	94984001	94985000	0.00985805	0.0278144	0.457803	chr10	94790865	94944578	uc007gvz.3_Plxnc1	-	-39424	chr10	95174745	95322965	uc007gwa.1_Cradd	-	189746
chr10	95003001	95004000	2.62415e-06	3.41326e-05	-0.265636	chr10	94790865	94944578	uc007gvz.3_Plxnc1	-	-58424	chr10	95174745	95322965	uc007gwa.1_Cradd	-	170746
chr10	95027001	95028000	6.15381e-05	0.000434164	0.317307	chr10	94790865	94944578	uc007gvz.3_Plxnc1	-	-82424	chr10	95174745	95322965	uc007gwa.1_Cradd	-	146746
chr10	95200001	95201000	0.00471871	0.0152111	0.266532	chr10	95174745	95324097	uc007gwc.1_Cradd	-	0	chr10	95310895	95324133	uc007gwd.1_Cradd	-	109896
chr10	95204001	95205000	0.0111146	0.0306852	0.256713	chr10	95174745	95324097	uc007gwc.1_Cradd	-	0	chr10	95310895	95324133	uc007gwd.1_Cradd	-	105896
chr10	95264001	95265000	2.20099e-08	7.89249e-07	0.348132	chr10	95174745	95324097	uc007gwc.1_Cradd	-	0	chr10	95310895	95324133	uc007gwd.1_Cradd	-	45896
chr10	95265001	95266000	0.000854182	0.00373487	0.348684	chr10	95174745	95324097	uc007gwc.1_Cradd	-	0	chr10	95310895	95324133	uc007gwd.1_Cradd	-	44896
chr10	95266001	95267000	5.1029e-05	0.000371844	0.377516	chr10	95174745	95324097	uc007gwc.1_Cradd	-	0	chr10	95310895	95324133	uc007gwd.1_Cradd	-	43896
chr10	95267001	95268000	8.52607e-05	0.000565226	0.277863	chr10	95174745	95324097	uc007gwc.1_Cradd	-	0	chr10	95310895	95324133	uc007gwd.1_Cradd	-	42896
chr10	95552001	95553000	1.21755e-05	0.000117074	0.341063	chr10	95547006	95564167	uc007gwp.2_Nudt4	-	0	chr10	95559230	95559321	uc011xme.1_Mir3058	-	6231
chr10	95904001	95905000	4.07363e-08	1.28345e-06	0.251931	chr10	95778916	95797236	uc007gwt.1_AK165804	+	-106766	chr10	95940662	96003003	uc011xmf.1_Eea1	+	35663
chr10	96075001	96076000	1.72145e-06	2.43608e-05	0.528643	chr10	95940662	96045518	uc007gwv.1_Eea1	+	-29484	chr10	96226206	96248708	uc033fsi.1_4930459C07Rik	+	150207
chr10	96097001	96098000	1.3841e-09	9.52864e-08	-0.568937	chr10	95940662	96045518	uc007gwv.1_Eea1	+	-51484	chr10	96226206	96248708	uc033fsi.1_4930459C07Rik	+	128207
chr10	97361001	97362000	2.31385e-08	8.21038e-07	-0.489318	chr10	97035767	97061059	uc029res.1_4930556N09Rik	+	-299943	chr10	97423477	97423562	uc029ret.1_Mir3966	+	61478
chr10	98569001	98570000	6.83276e-12	1.47143e-09	-0.315614	chr10	98506843	98506864	uc029rew.1_JA187517	+	-62138	chr10	98833380	98833401	uc029rex.1_JA187517	+	263381
chr10	98610001	98611000	4.61002e-08	1.40633e-06	-0.389288	chr10	98506843	98506864	uc029rew.1_JA187517	+	-103138	chr10	98833380	98833401	uc029rex.1_JA187517	+	222381
chr10	99037001	99038000	0.0133185	0.0356147	0.250519	chr10	98915151	99026143	uc007gxf.2_Atp2b1	+	-10859	chr10	99107170	99197988	uc007gxh.1_Poc1b	+	69171
chr10	99136001	99137000	1.45695e-10	1.68445e-08	0.320597	chr10	99107740	99197988	uc007gxi.1_Poc1b	+	0	chr10	99263230	99267489	uc007gxk.2_Dusp6	+	126231
chr10	99268001	99269000	5.234e-08	1.55411e-06	0.303746	chr10	99263230	99267489	uc007gxk.2_Dusp6	+	-513	chr10	99298887	99356150	uc007gxl.1_AK083606	+	29888
chr10	99354001	99355000	2.10738e-05	0.000181709	0.386051	chr10	99298887	99423047	uc007gxm.1_AK043505	+	0	chr10	99411913	99411942	uc029rey.1_AB350795	-	56914
chr10	99521001	99522000	3.65422e-05	0.00028307	0.38704	chr10	99298887	99423047	uc007gxm.1_AK043505	+	-97955	chr10	99609170	99658134	uc007gxn.1_Gm20110	+	87171
chr10	99599001	99600000	3.38028e-06	4.17572e-05	-0.380079	chr10	99298887	99423047	uc007gxm.1_AK043505	+	-175955	chr10	99609170	99658134	uc007gxn.1_Gm20110	+	9171
chr10	99603001	99604000	0.00136478	0.00549128	0.293228	chr10	99298887	99423047	uc007gxm.1_AK043505	+	-179955	chr10	99609170	99658134	uc007gxn.1_Gm20110	+	5171
chr10	100059001	100060000	0.000704412	0.00319008	0.296294	chr10	100015825	100076905	uc007gxr.1_Kitl	+	0	chr10	100091671	100100412	uc007gxs.1_Kitl	+	31672
chr10	100087001	100088000	1.50595e-07	3.56919e-06	-0.272772	chr10	100015823	100100412	uc011xmk.1_Kitl	+	0	chr10	100091671	100100412	uc007gxs.1_Kitl	+	3672
chr10	100971001	100972000	5.3287e-06	6.02702e-05	-0.394724	chr10	100592385	100618391	uc007gxz.1_1700017N19Rik	+	-352611	chr10	101681486	102391468	uc029rfb.1_Mgat4c	+	709487
chr10	101480001	101481000	0.00279697	0.00990011	-0.321782	chr10	100592385	100618391	uc007gxz.1_1700017N19Rik	+	-861611	chr10	101681486	102391468	uc029rfb.1_Mgat4c	+	200487
chr10	102632001	102633000	7.74369e-05	0.000522974	0.406429	chr10	102512221	102546560	uc007gyf.1_Rassf9	+	-85442	chr10	103007846	103028777	uc007gyg.1_Alx1	-	374847
chr10	102827001	102828000	1.5764e-05	0.000144043	0.252342	chr10	102512221	102546560	uc007gyf.1_Rassf9	+	-280442	chr10	103007846	103028777	uc007gyg.1_Alx1	-	179847
chr10	102832001	102833000	0.000221884	0.00123412	0.300476	chr10	102512221	102546560	uc007gyf.1_Rassf9	+	-285442	chr10	103007846	103028777	uc007gyg.1_Alx1	-	174847
chr10	103027001	103028000	0.00726178	0.021634	0.258178	chr10	103007846	103028777	uc007gyg.1_Alx1	-	0	chr10	103063197	103236322	uc011xmu.1_Lrriq1	-	35198
chr10	103028001	103029000	5.13127e-06	5.84235e-05	0.380597	chr10	103007846	103028777	uc007gyg.1_Alx1	-	0	chr10	103063197	103236322	uc011xmu.1_Lrriq1	-	34198
chr10	103263001	103264000	1.031e-07	2.64595e-06	0.256176	chr10	103214398	103236322	uc007gyi.1_Lrriq1	-	-26680	chr10	103367807	103419379	uc007gyj.2_Slc6a15	+	103808
chr10	103459001	103460000	9.88414e-06	9.89096e-05	0.356205	chr10	103367807	103419379	uc007gyk.2_Slc6a15	+	-39623	chr10	103507367	103566565	uc007gyl.1_AK144104	+	47368
chr10	103503001	103504000	0.0106213	0.029557	-0.264773	chr10	103367807	103419379	uc007gyk.2_Slc6a15	+	-83623	chr10	103507367	103566565	uc007gyl.1_AK144104	+	3368
chr10	103936001	103937000	0.0004382	0.00216003	-0.265199	chr10	103507367	103566565	uc007gyl.1_AK144104	+	-369437	chr10	104142986	104153965	uc011xmv.1_Gm4340	+	205987
chr10	104292001	104293000	0.000159653	0.000943511	-0.440608	chr10	104287268	104287376	uc033fso.1_Mir6411	+	-4626	chr10	104610604	104610625	uc029rfi.1_AB349811	+	317605
chr10	104293001	104294000	0.000803164	0.00355279	-0.287439	chr10	104287268	104287376	uc033fso.1_Mir6411	+	-5626	chr10	104610604	104610625	uc029rfi.1_AB349811	+	316605
chr10	104402001	104403000	0.00040986	0.00204448	0.316398	chr10	104287268	104287376	uc033fso.1_Mir6411	+	-114626	chr10	104610604	104610625	uc029rfi.1_AB349811	+	207605
chr10	104579001	104580000	5.87517e-08	1.70083e-06	-0.551491	chr10	104287268	104287376	uc033fso.1_Mir6411	+	-291626	chr10	104610604	104610625	uc029rfi.1_AB349811	+	30605
chr10	104795001	104796000	0.000855035	0.00373788	-0.400797	chr10	104610604	104610625	uc029rfi.1_AB349811	+	-184377	chr10	105187663	105574479	uc007gym.1_Tmtc2	-	391664
chr10	104818001	104819000	0.00163965	0.00639485	-0.279	chr10	104610604	104610625	uc029rfi.1_AB349811	+	-207377	chr10	105187663	105574479	uc007gym.1_Tmtc2	-	368664
chr10	105074001	105075000	5.05288e-05	0.000369059	-0.318974	chr10	104610604	104610625	uc029rfi.1_AB349811	+	-463377	chr10	105187663	105574479	uc007gym.1_Tmtc2	-	112664
chr10	105941001	105942000	0.000171479	0.00100023	-0.270335	chr10	105841478	105847510	uc007gyp.1_Ccdc59	+	-93492	chr10	106466938	106470968	uc007gyq.1_AK045502	-	524939
chr10	105982001	105983000	4.16229e-06	4.9287e-05	0.347928	chr10	105841478	105847510	uc007gyp.1_Ccdc59	+	-134492	chr10	106466938	106470968	uc007gyq.1_AK045502	-	483939
chr10	106086001	106087000	0.00589679	0.0182321	-0.266288	chr10	105841478	105847510	uc007gyp.1_Ccdc59	+	-238492	chr10	106466938	106470968	uc007gyq.1_AK045502	-	379939
chr10	106161001	106162000	3.14052e-05	0.000250381	0.33667	chr10	105841478	105847510	uc007gyp.1_Ccdc59	+	-313492	chr10	106466938	106470968	uc007gyq.1_AK045502	-	304939
chr10	107001001	107002000	1.58661e-08	6.1154e-07	-0.487894	chr10	106965081	107123664	uc007gyv.2_Acss3	-	0	chr10	107102061	107102109	uc029rfk.1_AB353040	+	100062
chr10	107272001	107273000	2.58031e-06	3.36983e-05	0.406023	chr10	107271830	107425143	uc007gyy.1_Lin7a	+	0	chr10	107272393	107425143	uc033fsp.1_Lin7a	+	0
chr10	107365001	107366000	0.000432017	0.00213462	0.299584	chr10	107272393	107425143	uc033fsp.1_Lin7a	+	0	chr10	107482907	107486134	uc007gyz.1_Myf5	-	116908
chr10	107461001	107462000	5.86638e-07	1.03685e-05	0.323999	chr10	107272393	107425143	uc033fsp.1_Lin7a	+	-35859	chr10	107482907	107486134	uc007gyz.1_Myf5	-	20908
chr10	107746001	107747000	2.87507e-07	5.91044e-06	-0.395531	chr10	107645552	107720027	uc011xnb.1_Ptprq	-	-25975	chr10	107762309	107912134	uc011xnc.1_Otogl	-	15310
chr10	108286001	108287000	0.000287566	0.00152628	0.367467	chr10	108249434	108277575	uc007gze.1_Ppp1r12a	+	-8427	chr10	108332188	108414391	uc007gzf.1_Pawr	+	45189
chr10	108301001	108302000	1.13887e-12	3.32729e-10	-0.422405	chr10	108249434	108277575	uc007gze.1_Ppp1r12a	+	-23427	chr10	108332188	108414391	uc007gzf.1_Pawr	+	30189
chr10	108417001	108418000	1.51308e-08	5.89699e-07	0.2858	chr10	108332687	108414391	uc011xnd.1_Pawr	+	-2611	chr10	108497649	109010975	uc007gzg.2_Syt1	-	79650
chr10	108517001	108518000	1.02611e-05	0.000101983	-0.318741	chr10	108497649	109010975	uc007gzi.2_Syt1	-	0	chr10	108699043	108700160	uc007gzj.2_Gm5136	-	181044
chr10	108767001	108768000	5.8817e-05	0.000418105	0.322691	chr10	108497649	109010975	uc007gzi.2_Syt1	-	0	chr10	109683438	109823619	uc007gzk.1_Nav3	-	915439
chr10	108810001	108811000	2.34126e-06	3.12139e-05	0.26954	chr10	108497649	109010975	uc007gzi.2_Syt1	-	0	chr10	109683438	109823619	uc007gzk.1_Nav3	-	872439
chr10	109035001	109036000	1.08434e-05	0.000106656	0.409629	chr10	108497649	109010975	uc007gzi.2_Syt1	-	-24027	chr10	109683438	109823619	uc007gzk.1_Nav3	-	647439
chr10	109036001	109037000	0.00215711	0.0080036	0.295157	chr10	108497649	109010975	uc007gzi.2_Syt1	-	-25027	chr10	109683438	109823619	uc007gzk.1_Nav3	-	646439
chr10	109621001	109622000	0.000295682	0.00156182	0.422002	chr10	108497649	109010975	uc007gzi.2_Syt1	-	-610027	chr10	109683438	109823619	uc007gzk.1_Nav3	-	61439
chr10	110113001	110114000	2.29846e-05	0.000194811	0.438602	chr10	109683438	110000219	uc007gzl.1_Nav3	-	-112783	chr10	110600649	110615961	uc007gzm.1_9230102K24Rik	+	486650
chr10	110561001	110562000	7.00908e-11	9.54876e-09	-0.654219	chr10	109683438	110000219	uc007gzl.1_Nav3	-	-560783	chr10	110600649	110615961	uc007gzm.1_9230102K24Rik	+	38650
chr10	110640001	110641000	0.00259278	0.00930058	-0.269231	chr10	110600649	110615961	uc007gzm.1_9230102K24Rik	+	-24041	chr10	110745464	110756637	uc007gzn.1_E2f7	+	104465
chr10	110641001	110642000	0.000115996	0.000728419	0.317576	chr10	110600649	110615961	uc007gzm.1_9230102K24Rik	+	-25041	chr10	110745464	110756637	uc007gzn.1_E2f7	+	103465
chr10	110977001	110978000	4.78503e-69	2.08178e-65	-0.494481	chr10	110962002	111010066	uc007gzw.2_Zdhhc17	-	0	chr10	111164801	111264892	uc007gzx.1_Osbpl8	+	186802
chr10	111127001	111128000	7.96414e-08	2.15939e-06	-0.545349	chr10	110962002	111010066	uc007gzw.2_Zdhhc17	-	-116936	chr10	111164801	111264892	uc007gzx.1_Osbpl8	+	36802
chr10	111192001	111193000	0.00912126	0.0261125	-0.254461	chr10	111164801	111297247	uc007gzz.1_Osbpl8	+	0	chr10	111298678	111301736	uc011xnf.1_Bbs10	+	105679
chr10	111193001	111194000	0.00621928	0.019049	-0.267734	chr10	111164801	111297247	uc007gzz.1_Osbpl8	+	0	chr10	111298678	111301736	uc011xnf.1_Bbs10	+	104679
chr10	111396001	111397000	3.74585e-11	5.7888e-09	-0.25787	chr10	111298678	111301736	uc011xnf.1_Bbs10	+	-94266	chr10	111473191	111495004	uc007haa.2_Nap1l1	+	76192
chr10	111433001	111434000	0.00289275	0.0101753	0.268439	chr10	111298678	111301736	uc011xnf.1_Bbs10	+	-131266	chr10	111473191	111495004	uc007haa.2_Nap1l1	+	39192
chr10	111512001	111513000	1.29536e-05	0.00012306	-0.280296	chr10	111506285	111508649	uc007haf.2_Phlda1	+	-3353	chr10	111586718	111594273	uc029rfn.1_4933440J02Rik	-	73719
chr10	111517001	111518000	9.09314e-05	0.000595579	0.298902	chr10	111506285	111508649	uc007haf.2_Phlda1	+	-8353	chr10	111586718	111594273	uc029rfn.1_4933440J02Rik	-	68719
chr10	111654001	111655000	3.82924e-05	0.000294011	0.418566	chr10	111586718	111594273	uc029rfn.1_4933440J02Rik	-	-59729	chr10	111854520	111874376	uc029rfo.1_Gm20758	-	199521
chr10	112229001	112230000	1.00795e-06	1.5901e-05	0.329135	chr10	112172539	112216555	uc011xni.1_Caps2	+	-12447	chr10	112271122	112465874	uc007hao.1_Kcnc2	+	41123
chr10	114014001	114015000	0.000436747	0.00215406	-0.351064	chr10	113586577	113614774	uc029rfr.1_Mir669h	+	-399228	chr10	114398820	114801370	uc007hat.2_Trhde	-	383821
chr10	114801001	114802000	6.17287e-05	0.000435309	0.303522	chr10	114787493	114801370	uc007hav.2_Trhde	-	0	chr10	115078640	115185022	uc007haw.2_Tph2	-	276641
chr10	115120001	115121000	1.04769e-09	7.6775e-08	0.360121	chr10	115078640	115185022	uc007haw.2_Tph2	-	0	chr10	115197870	115251493	uc007hax.2_Tbc1d15	-	76871
chr10	115132001	115133000	1.87989e-09	1.20467e-07	0.327962	chr10	115078640	115185022	uc007haw.2_Tph2	-	0	chr10	115197870	115251493	uc007hax.2_Tbc1d15	-	64871
chr10	115175001	115176000	3.13335e-08	1.04303e-06	-0.462164	chr10	115078640	115185022	uc007haw.2_Tph2	-	0	chr10	115197870	115251493	uc007hax.2_Tbc1d15	-	21871
chr10	115265001	115266000	1.08367e-05	0.000106603	0.292875	chr10	115197870	115251493	uc007hax.2_Tbc1d15	-	-13509	chr10	115289861	115315591	uc007haz.1_Rab21	-	23862
chr10	115271001	115272000	4.96084e-07	9.09826e-06	0.275284	chr10	115197870	115251493	uc007hax.2_Tbc1d15	-	-19509	chr10	115289861	115315591	uc007haz.1_Rab21	-	17862
chr10	115276001	115277000	1.60569e-06	2.30384e-05	-0.312136	chr10	115197870	115251493	uc007hax.2_Tbc1d15	-	-24509	chr10	115289861	115315591	uc007haz.1_Rab21	-	12862
chr10	115279001	115280000	4.67328e-05	0.000345827	0.29591	chr10	115197870	115251493	uc007hax.2_Tbc1d15	-	-27509	chr10	115289861	115315591	uc007haz.1_Rab21	-	9862
chr10	115427001	115428000	1.4806e-08	5.80431e-07	-0.378085	chr10	115384958	115432771	uc007hbg.1_Zfc3h1	+	0	chr10	115427304	115432771	uc007hbh.1_Zfc3h1	+	0
chr10	115433001	115434000	1.45679e-08	5.73005e-07	-0.411374	chr10	115427304	115432771	uc007hbh.1_Zfc3h1	+	-231	chr10	115450313	115587780	uc007hbi.1_Lgr5	-	16314
chr10	115459001	115460000	6.83737e-05	0.000472839	0.259492	chr10	115450313	115587780	uc007hbi.1_Lgr5	-	0	chr10	115462672	115587780	uc007hbj.1_Lgr5	-	2673
chr10	115494001	115495000	2.15e-05	0.000184646	0.394319	chr10	115474991	115587780	uc007hbk.1_Lgr5	-	0	chr10	115569985	115582454	uc007hbl.2_A930009A15Rik	+	74986
chr10	115512001	115513000	3.90382e-08	1.23873e-06	0.2745	chr10	115474991	115587780	uc007hbk.1_Lgr5	-	0	chr10	115569985	115582454	uc007hbl.2_A930009A15Rik	+	56986
chr10	115516001	115517000	4.01796e-05	0.000305763	0.329194	chr10	115474991	115587780	uc007hbk.1_Lgr5	-	0	chr10	115569985	115582454	uc007hbl.2_A930009A15Rik	+	52986
chr10	115670001	115671000	2.53176e-05	0.000210711	0.371913	chr10	115474991	115587780	uc007hbk.1_Lgr5	-	-82222	chr10	115817283	115849893	uc007hbm.2_Tspan8	+	146284
chr10	115805001	115806000	0.00655219	0.0198796	-0.266729	chr10	115474991	115587780	uc007hbk.1_Lgr5	-	-217222	chr10	115817283	115849893	uc007hbm.2_Tspan8	+	11284
chr10	115831001	115832000	0.0105406	0.029377	0.257388	chr10	115817283	115849893	uc007hbo.2_Tspan8	+	0	chr10	116018362	116274929	uc007hbp.2_Ptprr	+	186363
chr10	116018001	116019000	8.8469e-10	6.75758e-08	0.2867	chr10	115817283	115849893	uc007hbo.2_Tspan8	+	-168109	chr10	116018362	116274929	uc007hbp.2_Ptprr	+	0
chr10	116107001	116108000	1.04224e-06	1.6326e-05	0.28392	chr10	116018362	116274929	uc007hbp.2_Ptprr	+	0	chr10	116111663	116113917	uc007hbq.2_4933416C03Rik	-	3664
chr10	116301001	116302000	6.39579e-06	6.97117e-05	0.291779	chr10	116275522	116319919	uc007hbu.1_Ptprb	+	0	chr10	116301373	116389538	uc007hbv.2_Ptprb	+	0
chr10	116313001	116314000	1.15982e-06	1.77946e-05	0.324137	chr10	116301373	116389538	uc007hbv.2_Ptprb	+	0	chr10	116417867	116473523	uc007hbw.1_Kcnmb4	-	103868
chr10	116315001	116316000	3.22554e-07	6.47724e-06	0.389281	chr10	116301373	116389538	uc007hbv.2_Ptprb	+	0	chr10	116417867	116473523	uc007hbw.1_Kcnmb4	-	101868
chr10	116381001	116382000	5.3371e-07	9.63992e-06	0.377442	chr10	116301373	116389538	uc007hbv.2_Ptprb	+	0	chr10	116417867	116473523	uc007hbw.1_Kcnmb4	-	35868
chr10	116711001	116712000	3.28912e-06	4.08594e-05	0.301806	chr10	116674590	116679303	uc007hcg.1_AK144843	+	-31699	chr10	116723066	116729177	uc007hch.1_1700030O20Rik	-	11067
chr10	116834001	116835000	2.23089e-07	4.82767e-06	0.523404	chr10	116776544	116896879	uc007hci.1_Myrfl	-	0	chr10	116905783	116937655	uc011xnl.1_Rab3ip	-	70784
chr10	116846001	116847000	1.18065e-10	1.43275e-08	0.639283	chr10	116776544	116896879	uc007hci.1_Myrfl	-	0	chr10	116905783	116937655	uc011xnl.1_Rab3ip	-	58784
chr10	116871001	116872000	1.44488e-05	0.0001343	-0.273218	chr10	116776544	116896879	uc007hci.1_Myrfl	-	0	chr10	116905783	116937655	uc011xnl.1_Rab3ip	-	33784
chr10	116895001	116896000	2.66756e-07	5.56561e-06	0.353268	chr10	116776544	116896879	uc007hci.1_Myrfl	-	0	chr10	116905783	116937655	uc011xnl.1_Rab3ip	-	9784
chr10	116935001	116936000	1.66623e-06	2.37389e-05	-0.287308	chr10	116905783	116950380	uc007hck.1_Rab3ip	-	0	chr10	116950561	116959304	uc007hcm.2_4933412E12Rik	+	14562
chr10	117023001	117024000	3.50554e-06	4.29708e-05	0.30964	chr10	116986313	117025040	uc007hcp.1_Best3	+	0	chr10	117043745	117045101	uc007hcq.1_AK145303	+	19746
chr10	117038001	117039000	1.88641e-09	1.20807e-07	0.256757	chr10	116986313	117025040	uc007hcp.1_Best3	+	-12962	chr10	117043745	117045101	uc007hcq.1_AK145303	+	4746
chr10	117066001	117067000	8.78337e-07	1.42574e-05	0.309921	chr10	117050997	117063814	uc007hcs.1_Cct2	-	-2188	chr10	117070126	117148474	uc007hct.1_Frs2	-	3127
chr10	117109001	117110000	0.00025309	0.0013748	0.330139	chr10	117082804	117148474	uc007hcu.1_Frs2	-	0	chr10	117178449	117181110	uc007hcv.1_AK015188	+	68450
chr10	117130001	117131000	1.09349e-10	1.35169e-08	0.528368	chr10	117082804	117148474	uc007hcu.1_Frs2	-	0	chr10	117178449	117181110	uc007hcv.1_AK015188	+	47450
chr10	117207001	117208000	9.78465e-10	7.31757e-08	-0.390317	chr10	117178449	117181110	uc007hcv.1_AK015188	+	-25892	chr10	117215140	117217358	uc007hcw.2_Yeats4	-	7141
chr10	117230001	117231000	5.14489e-06	5.85453e-05	0.301229	chr10	117215140	117224507	uc011xnn.1_Yeats4	-	-5495	chr10	117232236	117238681	uc007hcy.2_9530003J23Rik	-	1237
chr10	117252001	117253000	9.79487e-08	2.54412e-06	0.330817	chr10	117233752	117238681	uc007hcz.2_9530003J23Rik	-	-13321	chr10	117277540	117282272	uc007hda.1_Lyz2	-	24541
chr10	117276001	117277000	6.92753e-19	4.66799e-16	-0.37721	chr10	117233752	117238681	uc007hcz.2_9530003J23Rik	-	-37321	chr10	117277540	117282272	uc007hda.1_Lyz2	-	541
chr10	117294001	117295000	6.00953e-10	5.01114e-08	0.462314	chr10	117287794	117292868	uc007hdc.2_Lyz1	-	-1134	chr10	117344667	117376973	uc007hdd.2_Cpsf6	-	49668
chr10	117305001	117306000	0.000344782	0.00177238	0.28948	chr10	117287794	117292868	uc007hdc.2_Lyz1	-	-12134	chr10	117344667	117376973	uc007hdd.2_Cpsf6	-	38668
chr10	117446001	117447000	4.10004e-05	0.000310702	0.289893	chr10	117353804	117376973	uc007hdg.2_Cpsf6	-	-69029	chr10	117446023	117447435	uc007hdh.1_AK076673	-	0
chr10	117639001	117640000	8.14696e-07	1.34513e-05	0.359712	chr10	117629499	117687352	uc007hdj.2_Cpm	+	0	chr10	117675892	117687352	uc007hdk.2_Cpm	+	35893
chr10	117659001	117660000	6.10914e-05	0.000431545	0.254474	chr10	117629499	117687352	uc007hdj.2_Cpm	+	0	chr10	117675892	117687352	uc007hdk.2_Cpm	+	15893
chr10	117676001	117677000	3.36036e-09	1.87536e-07	0.476157	chr10	117675892	117687352	uc007hdk.2_Cpm	+	0	chr10	117688874	117710028	uc007hdl.2_Mdm2	-	11875
chr10	117945001	117946000	1.54849e-08	6.01039e-07	-0.341969	chr10	117925458	117948307	uc029rfv.1_4933411E08Rik	+	0	chr10	118141786	118148139	uc007hds.2_Mdm1	+	195787
chr10	118000001	118001000	0.000356306	0.00182254	-0.281455	chr10	117925458	117948307	uc029rfv.1_4933411E08Rik	+	-51695	chr10	118141786	118148139	uc007hds.2_Mdm1	+	140787
chr10	118002001	118003000	1.11788e-05	0.000109254	-0.295681	chr10	117925458	117948307	uc029rfv.1_4933411E08Rik	+	-53695	chr10	118141786	118148139	uc007hds.2_Mdm1	+	138787
chr10	118004001	118005000	3.67667e-05	0.000284468	0.339731	chr10	117925458	117948307	uc029rfv.1_4933411E08Rik	+	-55695	chr10	118141786	118148139	uc007hds.2_Mdm1	+	136787
chr10	118011001	118012000	4.96896e-11	7.28162e-09	-0.258437	chr10	117925458	117948307	uc029rfv.1_4933411E08Rik	+	-62695	chr10	118141786	118148139	uc007hds.2_Mdm1	+	129787
chr10	118062001	118063000	5.77103e-06	6.42403e-05	-0.253767	chr10	117925458	117948307	uc029rfv.1_4933411E08Rik	+	-113695	chr10	118141786	118148139	uc007hds.2_Mdm1	+	78787
chr10	118139001	118140000	6.70426e-11	9.22138e-09	-0.304614	chr10	117925458	117948307	uc029rfv.1_4933411E08Rik	+	-190695	chr10	118141786	118148139	uc007hds.2_Mdm1	+	1787
chr10	118596001	118597000	2.70483e-06	3.49775e-05	0.352202	chr10	118502034	118556525	uc033fst.1_Tmevpg1	-	-39477	chr10	118718145	118719428	uc007hdz.1_AK089123	-	121146
chr10	118675001	118676000	5.48868e-05	0.000394753	0.384026	chr10	118502034	118556525	uc033fst.1_Tmevpg1	-	-118477	chr10	118718145	118719428	uc007hdz.1_AK089123	-	42146
chr10	118696001	118697000	5.10965e-06	5.82304e-05	0.313482	chr10	118502034	118556525	uc033fst.1_Tmevpg1	-	-139477	chr10	118718145	118719428	uc007hdz.1_AK089123	-	21146
chr10	118710001	118711000	3.13284e-07	6.32855e-06	0.273711	chr10	118502034	118556525	uc033fst.1_Tmevpg1	-	-153477	chr10	118718145	118719428	uc007hdz.1_AK089123	-	7146
chr10	118788001	118789000	2.39236e-05	0.000200965	-0.473999	chr10	118718145	118719428	uc007hdz.1_AK089123	-	-68574	chr10	118859348	118868903	uc007hea.1_Dyrk2	-	70349
chr10	118794001	118795000	0.000283473	0.00150836	0.407461	chr10	118718145	118719428	uc007hdz.1_AK089123	-	-74574	chr10	118859348	118868903	uc007hea.1_Dyrk2	-	64349
chr10	118957001	118958000	1.30039e-05	0.000123411	-0.269985	chr10	118920380	118927143	uc033fsu.1_C230029M16	-	-29859	chr10	119092904	119103107	uc029rjf.1_1700064J06Rik	+	134905
chr10	119063001	119064000	2.98721e-06	3.78227e-05	0.251096	chr10	118920380	118927143	uc033fsu.1_C230029M16	-	-135859	chr10	119092904	119103107	uc029rjf.1_1700064J06Rik	+	28905
chr10	119109001	119110000	7.05675e-05	0.000484976	-0.405657	chr10	119092904	119103107	uc029rjf.1_1700064J06Rik	+	-5895	chr10	119198811	119240055	uc007hec.2_Cand1	-	88812
chr10	119169001	119170000	4.61475e-05	0.000342344	0.314063	chr10	119092904	119103107	uc029rjf.1_1700064J06Rik	+	-65895	chr10	119198811	119240055	uc007hec.2_Cand1	-	28812
chr10	119202001	119203000	1.21488e-08	4.99139e-07	0.317386	chr10	119198811	119240055	uc007hec.2_Cand1	-	0	chr10	119325107	119331862	uc007hed.1_AK015581	+	122108
chr10	119445001	119446000	9.38137e-09	4.09393e-07	0.261701	chr10	119438811	119455379	uc007hef.1_AK135691	-	0	chr10	119454033	120077161	uc007heg.2_Grip1	+	8034
chr10	119453001	119454000	9.93379e-09	4.26967e-07	0.540554	chr10	119438811	119455379	uc007hef.1_AK135691	-	0	chr10	119454033	120077161	uc007heg.2_Grip1	+	34
chr10	119454001	119455000	4.89312e-07	9.01372e-06	0.518112	chr10	119438811	119455379	uc007hef.1_AK135691	-	0	chr10	119454033	120087260	uc007hei.2_Grip1	+	0
chr10	119483001	119484000	9.85852e-07	1.5625e-05	0.369518	chr10	119454033	120087260	uc007hei.2_Grip1	+	0	chr10	119746061	119761699	uc029rjh.1_Grip1os2	-	262062
chr10	119692001	119693000	1.87778e-09	1.20371e-07	0.302889	chr10	119454033	120087260	uc007hei.2_Grip1	+	0	chr10	119746061	119761699	uc029rjh.1_Grip1os2	-	53062
chr10	119725001	119726000	6.06238e-10	5.04891e-08	0.503725	chr10	119454033	120087260	uc007hei.2_Grip1	+	0	chr10	119746061	119761699	uc029rjh.1_Grip1os2	-	20062
chr10	119932001	119933000	6.99296e-06	7.48789e-05	0.291801	chr10	119850738	120077161	uc007heo.2_Grip1	+	0	chr10	119992921	120077161	uc007hep.2_Grip1	+	59922
chr10	119954001	119955000	8.0626e-05	0.000540354	0.365759	chr10	119850738	120077161	uc007heo.2_Grip1	+	0	chr10	119992921	120077161	uc007hep.2_Grip1	+	37922
chr10	119999001	120000000	3.8665e-08	1.22864e-06	-0.293063	chr10	119992921	120087260	uc007heq.2_Grip1	+	0	chr10	120083607	120092026	uc007her.1_Helb	-	83608
chr10	120050001	120051000	0.000113719	0.000716389	-0.270568	chr10	119992921	120087260	uc007heq.2_Grip1	+	0	chr10	120083607	120092026	uc007her.1_Helb	-	32608
chr10	120201001	120202000	3.33822e-07	6.65476e-06	0.292141	chr10	120164975	120201537	uc007heu.1_Irak3	-	0	chr10	120201611	120203215	uc007hev.1_AK163103	+	0
chr10	120239001	120240000	1.02281e-05	0.000101711	0.28111	chr10	120227059	120232070	uc007hfa.1_Llph	+	-6932	chr10	120361274	120476935	uc007hfb.1_Hmga2	-	121275
chr10	120348001	120349000	6.80682e-08	1.90763e-06	0.290542	chr10	120227059	120232070	uc007hfa.1_Llph	+	-115932	chr10	120361274	120476935	uc007hfb.1_Hmga2	-	12275
chr10	120432001	120433000	5.1542e-06	5.86379e-05	0.294083	chr10	120361274	120476935	uc011xow.1_Hmga2	-	0	chr10	120470289	120476935	uc029rjj.1_Hmga2	-	37290
chr10	120462001	120463000	3.82862e-13	1.30693e-10	-0.431229	chr10	120361274	120476935	uc011xow.1_Hmga2	-	0	chr10	120470289	120476935	uc029rjj.1_Hmga2	-	7290
chr10	120493001	120494000	2.89015e-05	0.000234398	0.267476	chr10	120470289	120476935	uc029rjj.1_Hmga2	-	-16067	chr10	120765731	120774485	uc007hff.2_4921513I03Rik	+	271732
chr10	120552001	120553000	0.000801674	0.00354839	0.271025	chr10	120470289	120476935	uc029rjj.1_Hmga2	-	-75067	chr10	120765731	120774485	uc007hff.2_4921513I03Rik	+	212732
chr10	120553001	120554000	0.000229825	0.00127049	0.303515	chr10	120470289	120476935	uc029rjj.1_Hmga2	-	-76067	chr10	120765731	120774485	uc007hff.2_4921513I03Rik	+	211732
chr10	120688001	120689000	1.49918e-07	3.55735e-06	0.479345	chr10	120470289	120476935	uc029rjj.1_Hmga2	-	-211067	chr10	120765731	120774485	uc007hff.2_4921513I03Rik	+	76732
chr10	120752001	120753000	1.39539e-05	0.000130518	0.287714	chr10	120470289	120476935	uc029rjj.1_Hmga2	-	-275067	chr10	120765731	120774485	uc007hff.2_4921513I03Rik	+	12732
chr10	120810001	120811000	1.05361e-06	1.64681e-05	-0.302067	chr10	120781100	120898971	uc007hfh.2_Msrb3	-	0	chr10	120857628	120863328	uc029rjk.1_Gm15910	+	46629
chr10	121107001	121108000	8.83655e-07	1.43275e-05	0.309702	chr10	121083754	121100642	uc007hfk.1_Wif1	+	-6360	chr10	121263819	121294757	uc007hfl.2_Tbc1d30	-	155820
chr10	121304001	121305000	2.71882e-10	2.75082e-08	0.259288	chr10	121263819	121311189	uc007hfm.2_Tbc1d30	-	0	chr10	121365089	121372250	uc007hfn.1_Gns	+	60090
chr10	121420001	121421000	4.41984e-08	1.36534e-06	0.35626	chr10	121410350	121476250	uc007hfs.1_Rassf3	-	0	chr10	121546455	121586794	uc007hft.3_Tbk1	-	125456
chr10	121697001	121698000	9.3929e-08	2.46077e-06	-0.415247	chr10	121641700	121693914	uc011xoz.1_D930020B18Rik	+	-3088	chr10	121739936	121752859	uc007hfx.1_BC048403	+	41937
chr10	121999001	122000000	1.76465e-08	6.65077e-07	0.301942	chr10	121780990	122047315	uc007hgc.2_Srgap1	-	0	chr10	122078111	122079879	uc011xpa.1_Gm9079	-	78112
chr10	122102001	122103000	1.06755e-05	0.000105301	-0.26272	chr10	122081259	122097102	uc011xpb.1_Tmem5	-	-4900	chr10	122119696	122130558	uc011xpc.1_Gm4489	+	16697
chr10	122182001	122183000	2.79926e-10	2.8123e-08	0.31054	chr10	122119696	122130558	uc011xpc.1_Gm4489	+	-51444	chr10	122448498	122453453	uc007hge.1_Avpr1a	+	265499
chr10	122757001	122758000	2.1267e-07	4.66067e-06	0.443957	chr10	122678761	122945793	uc007hgh.2_Ppm1h	+	0	chr10	122985639	122985724	uc011xpd.1_Mirlet7i	-	227640
chr10	123009001	123010000	3.64071e-12	8.789e-10	-0.354754	chr10	122992060	123076505	uc033fsw.1_Mon2	-	0	chr10	123035287	123076505	uc007hgl.2_Mon2	-	25288
chr10	123685001	123686000	0.00416011	0.0137084	0.257303	chr10	123264075	123741204	uc007hgw.2_Fam19a2	+	0	chr10	124311237	124311285	uc029rjo.1_AB353040	+	625238
chr10	123840001	123841000	1.99911e-07	4.44135e-06	0.276792	chr10	123264075	123741204	uc007hgw.2_Fam19a2	+	-98798	chr10	124311237	124311285	uc029rjo.1_AB353040	+	470238
chr10	124040001	124041000	0.000544143	0.00258102	0.325221	chr10	123264075	123741204	uc007hgw.2_Fam19a2	+	-298798	chr10	124311237	124311285	uc029rjo.1_AB353040	+	270238
chr10	124496001	124497000	0.000503014	0.00242016	0.264064	chr10	124469073	124524488	uc011xpg.1_4930503E24Rik	+	0	chr10	125227484	125308873	uc007hgx.1_Slc16a7	-	730485
chr10	124591001	124592000	6.90221e-06	7.41094e-05	-0.383884	chr10	124469073	124524488	uc011xpg.1_4930503E24Rik	+	-66514	chr10	125227484	125308873	uc007hgx.1_Slc16a7	-	635485
chr10	124810001	124811000	7.01067e-06	7.50083e-05	0.503487	chr10	124469073	124524488	uc011xpg.1_4930503E24Rik	+	-285514	chr10	125227484	125308873	uc007hgx.1_Slc16a7	-	416485
chr10	124963001	124964000	0.00158238	0.00620914	0.334347	chr10	124469073	124524488	uc011xpg.1_4930503E24Rik	+	-438514	chr10	125227484	125308873	uc007hgx.1_Slc16a7	-	263485
chr10	124964001	124965000	4.01217e-06	4.78857e-05	-0.313577	chr10	124469073	124524488	uc011xpg.1_4930503E24Rik	+	-439514	chr10	125227484	125308873	uc007hgx.1_Slc16a7	-	262485
chr10	125187001	125188000	7.34544e-07	1.23781e-05	0.278905	chr10	124469073	124524488	uc011xpg.1_4930503E24Rik	+	-662514	chr10	125227484	125308873	uc007hgx.1_Slc16a7	-	39485
chr10	125328001	125329000	2.48543e-08	8.69132e-07	0.408704	chr10	125227484	125328535	uc007hgz.1_Slc16a7	-	0	chr10	125644813	125644834	uc029rjp.1_AB349811	+	315814
chr10	125576001	125577000	1.64192e-07	3.82086e-06	0.374835	chr10	125227484	125328535	uc007hgz.1_Slc16a7	-	-247467	chr10	125644813	125644834	uc029rjp.1_AB349811	+	67814
chr10	126030001	126031000	1.67064e-06	2.37897e-05	-0.299536	chr10	125966218	126015359	uc007hhd.2_Lrig3	+	-14643	chr10	126371974	126375062	uc007hhe.1_AK005576	+	340975
chr10	126082001	126083000	1.009e-05	0.000100557	0.373979	chr10	125966218	126015359	uc007hhd.2_Lrig3	+	-66643	chr10	126371974	126375062	uc007hhe.1_AK005576	+	288975
chr10	126236001	126237000	2.99052e-08	1.00721e-06	-0.293283	chr10	125966218	126015359	uc007hhd.2_Lrig3	+	-220643	chr10	126371974	126375062	uc007hhe.1_AK005576	+	134975
chr10	126239001	126240000	0.000217939	0.00121628	-0.310827	chr10	125966218	126015359	uc007hhd.2_Lrig3	+	-223643	chr10	126371974	126375062	uc007hhe.1_AK005576	+	131975
chr10	126634001	126635000	2.87357e-09	1.66545e-07	0.343077	chr10	126371974	126375062	uc007hhe.1_AK005576	+	-258940	chr10	126868427	126901371	uc007hhf.2_Xrcc6bp1	-	233428
chr10	126639001	126640000	3.25708e-07	6.52812e-06	0.312476	chr10	126371974	126375062	uc007hhe.1_AK005576	+	-263940	chr10	126868427	126901371	uc007hhf.2_Xrcc6bp1	-	228428
chr10	126701001	126702000	5.69644e-09	2.82392e-07	-0.278602	chr10	126371974	126375062	uc007hhe.1_AK005576	+	-325940	chr10	126868427	126901371	uc007hhf.2_Xrcc6bp1	-	166428
chr10	126788001	126789000	0.000304012	0.00159893	0.279209	chr10	126371974	126375062	uc007hhe.1_AK005576	+	-412940	chr10	126868427	126901371	uc007hhf.2_Xrcc6bp1	-	79428
chr10	126844001	126845000	1.27389e-09	8.92963e-08	0.282283	chr10	126371974	126375062	uc007hhe.1_AK005576	+	-468940	chr10	126868427	126901371	uc007hhf.2_Xrcc6bp1	-	23428
chr10	126862001	126863000	2.25614e-12	5.87148e-10	0.545838	chr10	126371974	126375062	uc007hhe.1_AK005576	+	-486940	chr10	126868427	126901371	uc007hhf.2_Xrcc6bp1	-	5428
chr10	126957001	126958000	1.01713e-10	1.27781e-08	0.536013	chr10	126887969	126901371	uc007hhh.2_Xrcc6bp1	-	-55631	chr10	126958022	126960997	uc007hhi.1_AK087024	+	23
chr10	127006001	127007000	1.37257e-07	3.31752e-06	0.288482	chr10	127000708	127020994	uc007hhl.2_Avil	+	0	chr10	127022331	127030814	uc007hhm.1_Tsfm	-	15332
chr10	127048001	127049000	4.2138e-06	4.97698e-05	0.352163	chr10	127041931	127045461	uc007hhr.1_Mettl1	+	-2541	chr10	127048245	127053006	uc007hht.2_Cyp27b1	+	0
chr10	127159001	127160000	5.652e-06	6.31772e-05	0.251229	chr10	127094258	127121160	uc007hia.2_Os9	-	-37842	chr10	127165155	127168523	uc007hib.2_B4galnt1	+	5156
chr10	127166001	127167000	0.000822398	0.00362298	0.349717	chr10	127165830	127172340	uc007hig.3_B4galnt1	+	0	chr10	127172425	127180645	uc033fsx.1_Slc26a10	-	5426
chr10	127287001	127288000	0.000304264	0.00159964	0.268423	chr10	127281955	127288771	uc007hix.1_Mbd6	-	0	chr10	127290792	127296288	uc007hiy.2_Ddit3	+	2793
chr10	127310001	127311000	1.6159e-07	3.77392e-06	0.340231	chr10	127296220	127311786	uc011xpp.1_Mars	-	0	chr10	127321963	127329943	uc007hja.2_Arhgap9	+	10964
chr10	127322001	127323000	1.41728e-07	3.40396e-06	-0.281374	chr10	127321963	127329943	uc007hja.2_Arhgap9	+	0	chr10	127323726	127329943	uc007hjb.1_Arhgap9	+	727
chr10	127391001	127392000	0.000125292	0.000775339	-0.294764	chr10	127390310	127499384	uc007hjl.2_R3hdm2	+	0	chr10	127420866	127499384	uc007hjm.2_R3hdm2	+	28867
chr10	127432001	127433000	1.56161e-10	1.78278e-08	0.607809	chr10	127420866	127499384	uc007hjn.2_R3hdm2	+	0	chr10	127451991	127499384	uc007hjo.2_R3hdm2	+	18992
chr10	127499001	127500000	3.86224e-09	2.08621e-07	0.417579	chr10	127459466	127499384	uc007hjq.2_R3hdm2	+	0	chr10	127501688	127508815	uc007hjr.1_Stac3	+	1689
chr10	127515001	127516000	1.18634e-08	4.89728e-07	-0.402827	chr10	127514938	127517156	uc007hjt.2_Ndufa4l2	+	0	chr10	127517122	127522444	uc007hju.2_Shmt2	-	1123
chr10	127721001	127722000	6.38239e-10	5.25852e-08	0.5732	chr10	127719327	127720940	uc007hki.2_Myo1a	+	-62	chr10	127724477	127731768	uc007hkj.2_Tac2	+	2478
chr10	127728001	127729000	3.84157e-08	1.22184e-06	0.295746	chr10	127725391	127731768	uc007hkk.2_Tac2	+	0	chr10	127739537	127747339	uc007hkl.1_Zbtb39	+	10538
chr10	127733001	127734000	8.85674e-05	0.000582861	-0.273365	chr10	127725391	127731768	uc007hkk.2_Tac2	+	-1234	chr10	127739537	127747339	uc007hkl.1_Zbtb39	+	5538
chr10	127749001	127750000	1.20032e-05	0.000115675	0.300987	chr10	127739537	127747339	uc007hkl.1_Zbtb39	+	-1663	chr10	127749883	127751080	uc033ftb.1_Gpr182	-	0
chr10	127752001	127753000	3.78514e-07	7.33953e-06	0.273332	chr10	127749601	127751798	uc007hkm.1_Gpr182	-	-204	chr10	127759762	127768299	uc007hkn.2_Rdh1	+	6763
chr10	127804001	127805000	1.44932e-07	3.46259e-06	0.502278	chr10	127801152	127846565	uc011xpv.1_Rdh18-ps	+	0	chr10	127824215	127846565	uc007hks.2_Rdh18-ps	+	19216
chr10	127936001	127937000	0.0013286	0.00537196	0.420523	chr10	127902074	127911759	uc007hkx.1_Sdr9c7	+	-24243	chr10	127990935	128007508	uc007hky.1_Hsd17b6	-	53936
chr10	128051001	128052000	3.12922e-07	6.32563e-06	0.262925	chr10	128035345	128048637	uc033ftc.1_Naca	+	-2365	chr10	128058981	128077254	uc007hld.1_Ptges3	+	6982
chr10	128095001	128096000	0.00419058	0.0137918	0.323561	chr10	128092459	128129303	uc007hlj.1_Baz2a	+	0	chr10	128096375	128119500	uc007hlk.1_Baz2a	+	376
chr10	128216001	128217000	0.00144497	0.00576055	-0.311941	chr10	128209909	128211794	uc007hlq.1_Spryd4	-	-4208	chr10	128225837	128231811	uc007hlr.1_Mip	+	8838
chr10	128297001	128298000	1.21027e-07	3.00767e-06	-0.314373	chr10	128296139	128298084	uc007hmc.1_Il23a	-	0	chr10	128303334	128307408	uc007hmd.1_Pan2	+	5335
chr10	128567001	128568000	1.97513e-08	7.26216e-07	-0.283462	chr10	128557765	128565934	uc007hnl.1_Pa2g4	-	-1068	chr10	128569367	128589501	uc007hnm.1_Erbb3	-	1368
chr10	128654001	128655000	3.78799e-06	4.57559e-05	-0.466225	chr10	128645883	128649811	uc007hnr.1_AK047988	+	-4191	chr10	128669886	128673918	uc007hnt.2_Suox	-	14887
chr10	128669001	128670000	1.22975e-06	1.86643e-05	0.434293	chr10	128645883	128649811	uc007hnr.1_AK047988	+	-19191	chr10	128669886	128673918	uc007hnt.2_Suox	-	0
chr10	128687001	128688000	7.74294e-09	3.54838e-07	0.307424	chr10	128681802	128696268	uc007hnx.2_Rab5b	-	0	chr10	128697938	128705026	uc007hoa.1_Cdk2	-	9939
chr10	128738001	128739000	6.08026e-09	2.96066e-07	0.395815	chr10	128737008	128744855	uc033ftm.1_Dgka	-	0	chr10	128747878	128766568	uc007hod.3_Wibg	+	8879
chr10	128779001	128780000	8.86512e-06	9.0583e-05	-0.419251	chr10	128748454	128766568	uc011xqi.2_Wibg	+	-12434	chr10	128790909	128799205	uc007hof.1_Mmp19	+	10910
chr10	128800001	128801000	4.77188e-11	7.03749e-09	-0.289328	chr10	128790952	128800824	uc007hoh.2_Mmp19	+	0	chr10	128800035	128804370	uc007hoi.1_Tmem198b	-	0
chr10	128911001	128912000	4.90563e-07	9.02763e-06	-0.277358	chr10	128909865	128912818	uc007hov.1_Cd63	+	0	chr10	128913590	128919297	uc007how.1_Rdh5	-	1591
chr10	128922001	128923000	3.65942e-06	4.45145e-05	-0.368392	chr10	128919913	128923524	uc007hoz.1_Bloc1s1	-	0	chr10	128922515	128923524	uc029rjw.1_Bloc1s1	-	0
chr10	128952001	128953000	0.000109598	0.000694628	0.402648	chr10	128933812	128958284	uc007hpb.1_Itga7	+	0	chr10	128953442	128958284	uc007hpc.1_Itga7	+	443
chr10	129051001	129052000	3.00735e-05	0.000241738	0.444109	chr10	129046131	129047061	uc007hph.1_Olfr765	-	-3941	chr10	129079031	129079961	uc007hpi.1_Olfr767	-	27032
chr10	129124001	129125000	0.000108158	0.0006872	0.312843	chr10	129111484	129112423	uc007hpk.1_Olfr769	-	-11579	chr10	129132830	129133766	uc007hpl.1_Olfr770	-	7831
chr10	129232001	129233000	5.75439e-08	1.67328e-06	0.302249	chr10	129186483	129187419	uc007hpo.1_Olfr773	-	-44583	chr10	129238150	129239089	uc007hpp.1_Olfr774	+	5151
chr10	129361001	129362000	2.41344e-32	3.28569e-29	0.516035	chr10	129350564	129351509	uc007hpv.1_Olfr782	+	-9493	chr10	129387634	129388594	uc007hpw.1_Olfr784	+	25635
chr10	129489001	129490000	5.34844e-06	6.0456e-05	-0.613898	chr10	129472693	129473629	uc007hpz.1_Olfr788	+	-15373	chr10	129500885	129501854	uc007hqa.1_Olfr790	+	10886
chr10	130046001	130047000	9.28985e-06	9.41108e-05	-0.279946	chr10	130033627	130034560	uc007hrb.1_Olfr821	+	-11442	chr10	130074411	130075350	uc007hrc.1_Olfr822	+	27412
chr10	130470001	130471000	5.2018e-08	1.54799e-06	0.275911	chr10	130446198	130455894	uc009vad.1_Vmn2r86	-	-14108	chr10	130471820	130497379	uc009vae.1_Vmn2r87	-	821
chr10	130508001	130509000	0.000130458	0.000800469	0.293738	chr10	130471820	130497379	uc009vae.1_Vmn2r87	-	-10623	chr10	130542346	130571793	uc029rjz.1_AK089146	+	33347
chr10	130524001	130525000	4.38684e-05	0.000328653	0.27693	chr10	130471820	130497379	uc009vae.1_Vmn2r87	-	-26623	chr10	130542346	130571793	uc029rjz.1_AK089146	+	17347
chr10	130527001	130528000	4.56076e-08	1.39583e-06	0.55897	chr10	130471820	130497379	uc009vae.1_Vmn2r87	-	-29623	chr10	130542346	130571793	uc029rjz.1_AK089146	+	14347
chr11	3126001	3127000	2.49246e-07	5.27667e-06	0.682547	chr11	3124020	3131944	uc007hrp.1_Pisd-ps1	+	0	chr11	3131849	3157936	uc007hrs.1_Sfi1	-	4850
chr11	3296001	3297000	1.32021e-07	3.21816e-06	-0.778662	chr11	3290456	3309083	uc029rkc.1_Patz1	+	0	chr11	3308999	3320722	uc029rkd.1_Gm11944	+	12000
chr11	3331001	3332000	9.26235e-10	7.01345e-08	0.473647	chr11	3330730	3342971	uc007hsq.1_Pik3ip1	+	0	chr11	3333504	3342971	uc011xqp.2_Pik3ip1	+	1505
chr11	3410001	3411000	7.92269e-10	6.18149e-08	0.270242	chr11	3239901	3462990	uc029rka.1_Mir3470a	-	0	chr11	3415982	3452325	uc007hsv.1_Rnf185	-	4983
chr11	3426001	3427000	6.44041e-05	0.000450399	0.289835	chr11	3415982	3452325	uc007hsw.1_Rnf185	-	0	chr11	3452436	3458342	uc029rke.1_8430429K09Rik	+	25437
chr11	3503001	3504000	4.92563e-05	0.000361163	0.364858	chr11	3498949	3504799	uc007htb.1_Inpp5j	-	0	chr11	3514701	3517348	uc007htc.1_Selm	+	10702
chr11	3533001	3534000	4.5957e-11	6.81786e-09	0.335298	chr11	3517521	3539292	uc011xqq.1_Smtn	-	0	chr11	3639784	3647536	uc007htj.2_Tug1	-	105785
chr11	3763001	3764000	1.1075e-10	1.36563e-08	-0.667167	chr11	3724401	3863903	uc007htr.1_Osbp2	-	0	chr11	3886087	3895126	uc007hts.2_4921536K21Rik	-	122088
chr11	3848001	3849000	1.02949e-06	1.61743e-05	0.266702	chr11	3724401	3863903	uc007htr.1_Osbp2	-	0	chr11	3886087	3895126	uc007hts.2_4921536K21Rik	-	37088
chr11	3894001	3895000	4.60282e-12	1.06365e-09	0.792645	chr11	3886087	3895126	uc007hts.2_4921536K21Rik	-	0	chr11	3895239	3901296	uc007htu.2_Dusp18	+	240
chr11	3895001	3896000	1.96835e-11	3.46152e-09	0.842218	chr11	3886087	3895126	uc007hts.2_4921536K21Rik	-	0	chr11	3895239	3901296	uc007htu.2_Dusp18	+	0
chr11	4060001	4061000	0.000822431	0.00362305	-0.355455	chr11	4031781	4048009	uc007hue.1_Sec14l4	+	-11993	chr11	4064852	4078990	uc007huf.2_Sec14l3	+	3853
chr11	4240001	4241000	1.11633e-09	8.05658e-08	0.510017	chr11	4236784	4241026	uc007hus.2_Osm	+	0	chr11	4257567	4272514	uc007hut.1_Lif	+	16568
chr11	4260001	4261000	1.82057e-06	2.54663e-05	-0.484363	chr11	4257567	4272514	uc007hut.1_Lif	+	0	chr11	4266795	4272514	uc007huu.2_Lif	+	5796
chr11	4404001	4405000	0.00084438	0.00370011	-0.253258	chr11	4346382	4441103	uc011xqw.1_Hormad2	-	0	chr11	4480867	4488366	uc007huw.1_Mtmr3	-	75868
chr11	4458001	4459000	1.72443e-05	0.000154826	-0.29053	chr11	4346382	4441103	uc011xqw.1_Hormad2	-	-16899	chr11	4480867	4488366	uc007huw.1_Mtmr3	-	21868
chr11	4602001	4603000	2.86432e-06	3.6586e-05	0.551089	chr11	4488908	4594815	uc007huy.1_Mtmr3	-	-7187	chr11	4620274	4627766	uc007huz.1_Gm11961	-	17275
chr11	4797001	4798000	1.37848e-09	9.50303e-08	0.372401	chr11	4782104	4833135	uc007hvi.1_Nf2	-	0	chr11	4808256	4820493	uc007hvj.1_Nf2	-	10257
chr11	4802001	4803000	0.000248952	0.00135655	-0.377381	chr11	4782104	4833135	uc007hvi.1_Nf2	-	0	chr11	4808256	4820493	uc007hvj.1_Nf2	-	5257
chr11	4841001	4842000	2.02223e-06	2.77271e-05	0.499669	chr11	4772333	4849544	uc029rkj.1_Nf2	-	0	chr11	4874002	4894200	uc007hvk.1_Nipsnap1	+	32003
chr11	4847001	4848000	0.00109584	0.00458145	0.309316	chr11	4772333	4849544	uc029rkj.1_Nf2	-	0	chr11	4874002	4894200	uc007hvk.1_Nipsnap1	+	26003
chr11	4888001	4889000	7.05225e-05	0.000484817	0.452301	chr11	4874002	4894200	uc011xrb.1_Nipsnap1	+	0	chr11	4891344	4891402	uc033ftr.1_Mir6918	+	2345
chr11	4927001	4928000	2.19772e-05	0.000187855	-0.626145	chr11	4895342	4928865	uc007hvl.1_Thoc5	+	0	chr11	4938755	4948064	uc007hvm.1_Nefh	-	10756
chr11	4944001	4945000	7.84659e-05	0.000528585	0.374279	chr11	4938755	4948064	uc007hvm.1_Nefh	-	0	chr11	4947520	5042794	uc007hvn.2_Ap1b1	+	2521
chr11	4947001	4948000	2.74324e-05	0.000224531	0.291319	chr11	4938755	4948064	uc007hvm.1_Nefh	-	0	chr11	4947520	5042794	uc007hvn.2_Ap1b1	+	0
chr11	4951001	4952000	5.99882e-05	0.000425013	0.337564	chr11	4947520	5042794	uc007hvn.2_Ap1b1	+	0	chr11	4986823	5042794	uc007hvo.2_Ap1b1	+	34824
chr11	5016001	5017000	1.01097e-07	2.60593e-06	-0.332136	chr11	4986823	5042794	uc007hvp.2_Ap1b1	+	0	chr11	5054130	5065327	uc007hvq.2_Gas2l1	-	37131
chr11	5064001	5065000	3.11352e-08	1.03885e-06	0.279422	chr11	5060469	5065094	uc007hvt.2_Gas2l1	-	0	chr11	5069686	5099088	uc007hvw.2_Ewsr1	-	4687
chr11	5095001	5096000	1.18884e-05	0.000114738	0.428422	chr11	5090458	5099088	uc007hwa.2_Ewsr1	-	0	chr11	5099437	5106091	uc007hwb.1_Rhbdd3	+	3438
chr11	5143001	5144000	4.6474e-05	0.000344294	0.330423	chr11	5106265	5152222	uc011xrd.1_Emid1	-	0	chr11	5191552	5261610	uc007hwh.1_Kremen1	-	47553
chr11	5409001	5410000	5.86005e-49	1.48451e-45	-0.250105	chr11	5288796	5444847	uc007hwl.1_Znrf3	-	0	chr11	5520640	5525993	uc007hwm.2_Xbp1	+	110641
chr11	5486001	5487000	5.75371e-09	2.84007e-07	0.452498	chr11	5288796	5444847	uc007hwl.1_Znrf3	-	-41155	chr11	5520640	5525993	uc007hwm.2_Xbp1	+	33641
chr11	5506001	5507000	0.000361777	0.00184469	0.269012	chr11	5288796	5444847	uc007hwl.1_Znrf3	-	-61155	chr11	5520640	5525993	uc007hwm.2_Xbp1	+	13641
chr11	5648001	5649000	2.89334e-07	5.93764e-06	0.321488	chr11	5569683	5689337	uc007hwr.1_Ankrd36	+	0	chr11	5703982	5707699	uc007hwt.1_Mrps24	-	54983
chr11	5702001	5703000	4.70755e-08	1.42918e-06	-0.273306	chr11	5569683	5689337	uc007hwr.1_Ankrd36	+	-12665	chr11	5703982	5707699	uc007hwt.1_Mrps24	-	983
chr11	5738001	5739000	9.77238e-07	1.55253e-05	0.397335	chr11	5714976	5741176	uc007hwx.1_Urgcp	-	0	chr11	5762149	5781876	uc007hwz.1_2210015D19Rik	+	23150
chr11	5866001	5867000	3.74097e-08	1.19692e-06	-0.368558	chr11	5861865	5872225	uc007hxi.2_Aebp1	+	0	chr11	5867600	5872225	uc007hxj.2_Aebp1	+	601
chr11	5867001	5868000	7.19617e-10	5.74912e-08	-0.702482	chr11	5861865	5872225	uc007hxi.2_Aebp1	+	0	chr11	5867600	5872225	uc007hxj.2_Aebp1	+	0
chr11	5910001	5911000	7.58807e-06	7.98373e-05	-0.391713	chr11	5904250	5915135	uc007hxo.2_Gck	-	0	chr11	5936934	5936958	uc029rkm.1_AB335742	+	25935
chr11	5976001	5977000	1.48405e-06	2.16607e-05	0.255011	chr11	5969665	6065748	uc007hxt.2_Camk2b	-	0	chr11	5976764	5978512	uc007hxu.1_Camk2b	-	0
chr11	5994001	5995000	4.61664e-05	0.000342446	0.284829	chr11	5969665	6065748	uc007hxt.2_Camk2b	-	0	chr11	6006287	6008328	uc007hxv.1_BC019819	+	11288
chr11	6221001	6222000	1.07073e-07	2.72521e-06	-0.428145	chr11	6211010	6230245	uc007hyb.2_Npc1l1	-	0	chr11	6257544	6267729	uc007hyc.1_Ddx56	-	35545
chr11	6365001	6366000	6.63992e-05	0.000461611	-0.276861	chr11	6292557	6359094	uc007hyj.2_Ogdh	+	-5908	chr11	6389363	6406162	uc007hyl.1_Zmiz2	+	23364
chr11	6374001	6375000	1.28546e-06	1.93121e-05	-0.292886	chr11	6292557	6359094	uc007hyj.2_Ogdh	+	-14908	chr11	6389363	6406162	uc007hyl.1_Zmiz2	+	14364
chr11	6380001	6381000	5.11657e-06	5.8286e-05	0.354167	chr11	6292557	6359094	uc007hyj.2_Ogdh	+	-20908	chr11	6389363	6406162	uc007hyl.1_Zmiz2	+	8364
chr11	6605001	6606000	2.31472e-10	2.42915e-08	0.289276	chr11	6597822	6606054	uc007hyy.1_Nacad	-	0	chr11	6615597	6626067	uc007hyz.2_Tbrg4	-	9598
chr11	6728001	6729000	1.51445e-05	0.000139555	-0.252598	chr11	6716000	6720037	uc007hze.1_Gm11981	-	-7965	chr11	7063488	7178505	uc007hzf.1_Adcy1	+	334489
chr11	6828001	6829000	2.75556e-06	3.54891e-05	-0.387642	chr11	6716000	6720037	uc007hze.1_Gm11981	-	-107965	chr11	7063488	7178505	uc007hzf.1_Adcy1	+	234489
chr11	6899001	6900000	0.00017955	0.00103892	0.285874	chr11	6716000	6720037	uc007hze.1_Gm11981	-	-178965	chr11	7063488	7178505	uc007hzf.1_Adcy1	+	163489
chr11	6976001	6977000	0.000782014	0.00347792	0.290751	chr11	6716000	6720037	uc007hze.1_Gm11981	-	-255965	chr11	7063488	7178505	uc007hzf.1_Adcy1	+	86489
chr11	7048001	7049000	1.19845e-10	1.44936e-08	-0.452693	chr11	6716000	6720037	uc007hze.1_Gm11981	-	-327965	chr11	7063488	7178505	uc007hzf.1_Adcy1	+	14489
chr11	7055001	7056000	0.000328378	0.00170302	-0.334596	chr11	6716000	6720037	uc007hze.1_Gm11981	-	-334965	chr11	7063488	7178505	uc007hzf.1_Adcy1	+	7489
chr11	7091001	7092000	1.15817e-13	4.4919e-11	-0.806171	chr11	7063488	7178505	uc007hzf.1_Adcy1	+	0	chr11	7159881	7178505	uc007hzg.1_Adcy1	+	67882
chr11	7583001	7584000	1.28689e-07	3.1496e-06	0.454882	chr11	7206090	7213923	uc007hzi.2_Igfbp3	-	-369079	chr11	7792562	7792603	uc029rkp.1_AB351889	-	208563
chr11	8034001	8035000	5.66664e-05	0.000405396	0.290204	chr11	7869776	7869848	uc033ftu.1_TRNA-Asp	+	-164154	chr11	8346144	8346190	uc029rkr.1_AB349811	+	311145
chr11	8044001	8045000	0.00239838	0.00872649	-0.292584	chr11	7869776	7869848	uc033ftu.1_TRNA-Asp	+	-174154	chr11	8346144	8346190	uc029rkr.1_AB349811	+	301145
chr11	8120001	8121000	1.67501e-06	2.38333e-05	-0.6205	chr11	7869776	7869848	uc033ftu.1_TRNA-Asp	+	-250154	chr11	8346144	8346190	uc029rkr.1_AB349811	+	225145
chr11	8350001	8351000	8.14146e-08	2.1941e-06	-0.350801	chr11	8346144	8346190	uc029rkr.1_AB349811	+	-3812	chr11	8431651	8468503	uc007hzj.1_Tns3	-	80652
chr11	8420001	8421000	0.00126375	0.0051559	0.283499	chr11	8346144	8346190	uc029rkr.1_AB349811	+	-73812	chr11	8431651	8468503	uc007hzj.1_Tns3	-	10652
chr11	8516001	8517000	0.0200474	0.0496233	-0.261227	chr11	8431651	8664535	uc007hzk.1_Tns3	-	0	chr11	8833497	8863884	uc007hzm.1_AK140049	-	316498
chr11	8601001	8602000	0.000306851	0.00161108	-0.282619	chr11	8431651	8664535	uc007hzk.1_Tns3	-	0	chr11	8833497	8863884	uc007hzm.1_AK140049	-	231498
chr11	8628001	8629000	4.9997e-07	9.15044e-06	0.318085	chr11	8431651	8664535	uc007hzk.1_Tns3	-	0	chr11	8833497	8863884	uc007hzm.1_AK140049	-	204498
chr11	8635001	8636000	1.70061e-05	0.000153148	0.365962	chr11	8431651	8664535	uc007hzk.1_Tns3	-	0	chr11	8833497	8863884	uc007hzm.1_AK140049	-	197498
chr11	8972001	8973000	1.55285e-06	2.24269e-05	0.463606	chr11	8874102	8881457	uc007hzo.1_Pkd1l1	-	-90545	chr11	8993141	9011128	uc007hzp.1_Hus1	-	20142
chr11	9033001	9034000	2.663e-06	3.45581e-05	-0.333213	chr11	9016053	9048991	uc011xrl.1_Sun3	-	0	chr11	9048591	9069354	uc007hzv.1_Gm11992	+	14592
chr11	9322001	9323000	1.26305e-05	0.00012058	0.337731	chr11	9191941	9684259	uc007iaa.1_Abca13	+	0	chr11	11114015	11263526	uc007iac.1_Vwc2	+	1791016
chr11	9641001	9642000	2.12568e-05	0.000182947	0.390376	chr11	9191941	9684259	uc007iaa.1_Abca13	+	0	chr11	11114015	11263526	uc007iac.1_Vwc2	+	1472016
chr11	9882001	9883000	0.000619444	0.00287036	0.274563	chr11	9191941	9684259	uc007iaa.1_Abca13	+	-197743	chr11	11114015	11263526	uc007iac.1_Vwc2	+	1231016
chr11	10197001	10198000	0.000283124	0.00150674	-0.282032	chr11	9191941	9684259	uc007iaa.1_Abca13	+	-512743	chr11	11114015	11263526	uc007iac.1_Vwc2	+	916016
chr11	10557001	10558000	0.000760877	0.00339917	-0.300729	chr11	9191941	9684259	uc007iaa.1_Abca13	+	-872743	chr11	11114015	11263526	uc007iac.1_Vwc2	+	556016
chr11	10785001	10786000	0.00134821	0.00543651	-0.276613	chr11	9191941	9684259	uc007iaa.1_Abca13	+	-1100743	chr11	11114015	11263526	uc007iac.1_Vwc2	+	328016
chr11	11115001	11116000	8.15849e-07	1.34631e-05	0.352009	chr11	11114743	11267721	uc007iad.2_Vwc2	+	0	chr11	11280039	11462419	uc007iae.2_Zpbp	-	164040
chr11	11116001	11117000	3.59703e-07	7.04508e-06	0.294343	chr11	11114743	11267721	uc007iad.2_Vwc2	+	0	chr11	11280039	11462419	uc007iae.2_Zpbp	-	163040
chr11	11280001	11281000	0.00256033	0.00920199	-0.28075	chr11	11114743	11267721	uc007iad.2_Vwc2	+	-12281	chr11	11280039	11462419	uc011xrm.1_Zpbp	-	0
chr11	11399001	11400000	7.19856e-07	1.21845e-05	0.255471	chr11	11280039	11462419	uc011xrm.1_Zpbp	-	0	chr11	11489265	11515190	uc007iaf.1_4930415F15Rik	+	89266
chr11	11517001	11518000	2.64323e-05	0.000218003	0.304985	chr11	11489265	11515190	uc007iaf.1_4930415F15Rik	+	-1812	chr11	11557420	11579460	uc007iag.1_AK041795	+	39421
chr11	11546001	11547000	0.000526926	0.00251407	-0.274451	chr11	11489265	11515190	uc007iaf.1_4930415F15Rik	+	-30812	chr11	11557420	11579460	uc007iag.1_AK041795	+	10421
chr11	11561001	11562000	3.50582e-08	1.13808e-06	0.270067	chr11	11557420	11579460	uc007iag.1_AK041795	+	0	chr11	11589222	11627838	uc007iah.1_4930512M02Rik	-	27223
chr11	11626001	11627000	5.71137e-19	3.8746e-16	0.49561	chr11	11623720	11627838	uc007iai.1_4930512M02Rik	-	0	chr11	11686212	11761424	uc007iaj.1_Ikzf1	+	59213
chr11	11683001	11684000	3.14321e-08	1.04562e-06	0.366708	chr11	11623720	11627838	uc007iai.1_4930512M02Rik	-	-55164	chr11	11686212	11761424	uc007iaj.1_Ikzf1	+	2213
chr11	11685001	11686000	4.99094e-08	1.49727e-06	0.4684	chr11	11623720	11627838	uc007iai.1_4930512M02Rik	-	-57164	chr11	11686212	11761424	uc007iaj.1_Ikzf1	+	213
chr11	11686001	11687000	2.96236e-07	6.06064e-06	0.427265	chr11	11623720	11627838	uc007iai.1_4930512M02Rik	-	-58164	chr11	11686212	11772926	uc007iam.1_Ikzf1	+	0
chr11	11901001	11902000	1.15708e-06	1.77621e-05	0.297668	chr11	11814100	11898144	uc007iax.2_Ddc	-	-2858	chr11	11930498	12027971	uc007iaz.2_Grb10	-	28499
chr11	12028001	12029000	5.63125e-06	6.30121e-05	0.418556	chr11	11967363	12037420	uc007ibb.2_Grb10	-	0	chr11	12236675	12412140	uc033ftw.1_Cobl	-	207676
chr11	12036001	12037000	5.63149e-07	1.00519e-05	0.366388	chr11	11967363	12037420	uc007ibb.2_Grb10	-	0	chr11	12236675	12412140	uc033ftw.1_Cobl	-	199676
chr11	12037001	12038000	8.04528e-13	2.47325e-10	0.515449	chr11	11967363	12037420	uc007ibb.2_Grb10	-	0	chr11	12236675	12412140	uc033ftw.1_Cobl	-	198676
chr11	12038001	12039000	1.3892e-06	2.05453e-05	0.338207	chr11	11967363	12037420	uc007ibb.2_Grb10	-	-582	chr11	12236675	12412140	uc033ftw.1_Cobl	-	197676
chr11	12208001	12209000	4.66543e-07	8.67172e-06	-0.33572	chr11	11967363	12037420	uc007ibb.2_Grb10	-	-170582	chr11	12236675	12412140	uc033ftw.1_Cobl	-	27676
chr11	12328001	12329000	1.93721e-05	0.000169727	-0.349971	chr11	12314513	12337130	uc007ibg.1_AK040873	+	0	chr11	14560335	14599225	uc007ibh.2_1700046C09Rik	-	2231336
chr11	12588001	12589000	0.000155548	0.000923452	-0.29855	chr11	12304866	12464960	uc007ibf.2_Cobl	-	-123042	chr11	14560335	14599225	uc007ibh.2_1700046C09Rik	-	1971336
chr11	12941001	12942000	0.000592206	0.00276573	-0.35718	chr11	12304866	12464960	uc007ibf.2_Cobl	-	-476042	chr11	14560335	14599225	uc007ibh.2_1700046C09Rik	-	1618336
chr11	13168001	13169000	3.49987e-05	0.000273534	-0.285792	chr11	12304866	12464960	uc007ibf.2_Cobl	-	-703042	chr11	14560335	14599225	uc007ibh.2_1700046C09Rik	-	1391336
chr11	13356001	13357000	2.73141e-05	0.000223754	0.336473	chr11	12304866	12464960	uc007ibf.2_Cobl	-	-891042	chr11	14560335	14599225	uc007ibh.2_1700046C09Rik	-	1203336
chr11	13530001	13531000	1.58906e-06	2.28581e-05	-0.607466	chr11	12304866	12464960	uc007ibf.2_Cobl	-	-1065042	chr11	14560335	14599225	uc007ibh.2_1700046C09Rik	-	1029336
chr11	14473001	14474000	9.02547e-07	1.45712e-05	0.369024	chr11	12304866	12464960	uc007ibf.2_Cobl	-	-2008042	chr11	14560335	14599225	uc007ibh.2_1700046C09Rik	-	86336
chr11	14641001	14642000	0.000703797	0.00318801	0.292607	chr11	14599239	14600316	uc007ibi.2_Pom121l12	+	-40686	chr11	16257723	16284551	uc007ibk.2_Vstm2a	+	1615724
chr11	15492001	15493000	1.48619e-07	3.53239e-06	0.574908	chr11	14599239	14600316	uc007ibi.2_Pom121l12	+	-891686	chr11	16257723	16284551	uc007ibk.2_Vstm2a	+	764724
chr11	16146001	16147000	3.86202e-05	0.00029605	0.272398	chr11	14599239	14600316	uc007ibi.2_Pom121l12	+	-1545686	chr11	16257723	16284551	uc007ibk.2_Vstm2a	+	110724
chr11	16411001	16412000	8.29032e-06	8.58805e-05	0.279674	chr11	16262913	16284551	uc033ftx.1_Vstm2a	+	-126451	chr11	16501637	16508484	uc007ibl.2_Sec61g	-	89638
chr11	16458001	16459000	0.000124203	0.000769793	0.34959	chr11	16262913	16284551	uc033ftx.1_Vstm2a	+	-173451	chr11	16501637	16508484	uc007ibl.2_Sec61g	-	42638
chr11	16506001	16507000	0.00043269	0.00213738	0.301612	chr11	16501637	16508484	uc011xrs.1_Sec61g	-	0	chr11	16516896	16517311	uc029rks.1_AK193034	+	9897
chr11	16947001	16948000	1.5914e-07	3.72731e-06	-0.31565	chr11	16936722	16951093	uc011xru.1_NR-015469	-	0	chr11	16951374	16954772	uc007ibt.1_Fbxo48	+	3375
chr11	16959001	16960000	2.0348e-09	1.27495e-07	-0.467401	chr11	16951409	16954772	uc007ibu.1_Fbxo48	+	-4230	chr11	16971205	17008718	uc007ibv.2_Plek	-	11206
chr11	17052001	17053000	1.30983e-13	4.96464e-11	0.375217	chr11	17051933	17079372	uc007iby.1_Cnrip1	+	0	chr11	17151138	17200380	uc007ibz.1_Ppp3r1	+	98139
chr11	17067001	17068000	0.000222352	0.00123629	-0.376122	chr11	17051933	17079372	uc007iby.1_Cnrip1	+	0	chr11	17151138	17200380	uc007ibz.1_Ppp3r1	+	83139
chr11	17104001	17105000	5.54675e-06	6.2279e-05	0.510313	chr11	17051933	17079372	uc007iby.1_Cnrip1	+	-24630	chr11	17151138	17200380	uc007ibz.1_Ppp3r1	+	46139
chr11	17461001	17462000	0.00134112	0.00541403	0.297128	chr11	17257617	17269176	uc007ice.1_C1d	+	-191826	chr11	17938748	17953875	uc007icf.2_Etaa1	-	476749
chr11	18443001	18444000	3.91097e-07	7.53316e-06	0.48485	chr11	17953969	17959578	uc007ici.1_AK013680	+	-483424	chr11	18846607	18871997	uc007icj.1_BC050140	-	402608
chr11	18724001	18725000	7.34508e-07	1.23781e-05	0.270177	chr11	17953969	17959578	uc007ici.1_AK013680	+	-764424	chr11	18846607	18871997	uc007icj.1_BC050140	-	121608
chr11	19465001	19466000	1.20413e-06	1.83548e-05	0.490469	chr11	19065274	19075740	uc029rkt.1_4933406G16Rik	+	-389262	chr11	19924441	20019086	uc007icq.1_Spred2	+	458442
chr11	19489001	19490000	1.38412e-08	5.50259e-07	-0.412345	chr11	19065274	19075740	uc029rkt.1_4933406G16Rik	+	-413262	chr11	19924441	20019086	uc007icq.1_Spred2	+	434442
chr11	19625001	19626000	0.00164389	0.00640752	0.341882	chr11	19065274	19075740	uc029rkt.1_4933406G16Rik	+	-549262	chr11	19924441	20019086	uc007icq.1_Spred2	+	298442
chr11	19666001	19667000	1.12781e-05	0.000110085	-0.318476	chr11	19065274	19075740	uc029rkt.1_4933406G16Rik	+	-590262	chr11	19924441	20019086	uc007icq.1_Spred2	+	257442
chr11	19709001	19710000	0.00047789	0.00232021	0.453103	chr11	19065274	19075740	uc029rkt.1_4933406G16Rik	+	-633262	chr11	19924441	20019086	uc007icq.1_Spred2	+	214442
chr11	19811001	19812000	2.76061e-05	0.000225638	0.413781	chr11	19065274	19075740	uc029rkt.1_4933406G16Rik	+	-735262	chr11	19924441	20019086	uc007icq.1_Spred2	+	112442
chr11	19917001	19918000	0.00231211	0.00847343	0.289357	chr11	19065274	19075740	uc029rkt.1_4933406G16Rik	+	-841262	chr11	19924441	20019086	uc007icq.1_Spred2	+	6442
chr11	19957001	19958000	1.0104e-11	2.00208e-09	-0.271162	chr11	19924441	20022597	uc007icr.1_Spred2	+	0	chr11	20020781	20024026	uc029rku.1_Spred2	+	62782
chr11	20039001	20040000	2.96946e-05	0.000239384	0.293853	chr11	20020781	20024026	uc029rku.1_Spred2	+	-14976	chr11	20062303	20112951	uc011xrw.1_Actr2	-	22304
chr11	20069001	20070000	4.18494e-05	0.000316166	-0.362946	chr11	20062303	20112951	uc011xrw.1_Actr2	-	0	chr11	20078685	20112951	uc007ict.2_Actr2	-	8686
chr11	20173001	20174000	0.0022927	0.00841787	0.309103	chr11	20078685	20112951	uc007ict.2_Actr2	-	-60051	chr11	20201601	20219487	uc007icu.1_Rab1	+	27602
chr11	20420001	20421000	0.00258017	0.00926273	-0.286566	chr11	20302179	20332713	uc007idb.2_Slc1a4	-	-87289	chr11	20543252	20653023	uc007idc.1_Sertad2	+	122253
chr11	20456001	20457000	0.000133052	0.000813546	0.36821	chr11	20302179	20332713	uc007idb.2_Slc1a4	-	-123289	chr11	20543252	20653023	uc007idc.1_Sertad2	+	86253
chr11	20599001	20600000	0.00366093	0.0123378	0.332577	chr11	20543252	20653023	uc007idd.1_Sertad2	+	0	chr11	20631976	20653023	uc007ide.1_Sertad2	+	31977
chr11	20794001	20795000	1.11454e-07	2.81665e-06	0.686012	chr11	20708624	20741548	uc007idi.2_Aftph	-	-52454	chr11	20823354	20831108	uc007idj.2_Lgalsl	-	28355
chr11	20930001	20931000	2.03252e-08	7.42948e-07	0.336715	chr11	20823354	20831108	uc007idj.2_Lgalsl	-	-98894	chr11	21091323	21143005	uc007idk.1_Peli1	+	160324
chr11	21006001	21007000	9.21031e-07	1.48111e-05	0.400839	chr11	20823354	20831108	uc007idj.2_Lgalsl	-	-174894	chr11	21091323	21143005	uc007idk.1_Peli1	+	84324
chr11	21051001	21052000	5.88482e-07	1.03909e-05	0.306716	chr11	20823354	20831108	uc007idj.2_Lgalsl	-	-219894	chr11	21091323	21143005	uc007idk.1_Peli1	+	39324
chr11	21052001	21053000	4.80347e-06	5.54037e-05	0.48383	chr11	20823354	20831108	uc007idj.2_Lgalsl	-	-220894	chr11	21091323	21143005	uc007idk.1_Peli1	+	38324
chr11	21058001	21059000	1.29033e-05	0.000122724	-0.255978	chr11	20823354	20831108	uc007idj.2_Lgalsl	-	-226894	chr11	21091323	21143005	uc007idk.1_Peli1	+	32324
chr11	21081001	21082000	0.000572233	0.00268901	0.307935	chr11	20823354	20831108	uc007idj.2_Lgalsl	-	-249894	chr11	21091323	21143005	uc007idk.1_Peli1	+	9324
chr11	21391001	21392000	0.000881414	0.00383094	0.251825	chr11	21370399	21374161	uc007idu.1_AK038605	+	-16841	chr11	21494729	21511180	uc011xsa.1_4932414J04Rik	-	102730
chr11	21569001	21570000	5.00309e-09	2.54255e-07	0.531082	chr11	21556691	21571934	uc007idv.2_Mdh1	-	0	chr11	21570033	21571818	uc029rkv.1_AK046369	-	34
chr11	21574001	21575000	0.00100615	0.00427106	0.47071	chr11	21572280	21898686	uc011xsb.1_Wdpcp	+	0	chr11	21994763	22001651	uc007idy.1_Otx1	-	419764
chr11	21993001	21994000	2.52983e-07	5.34062e-06	0.250357	chr11	21572280	21898686	uc011xsb.1_Wdpcp	+	-94316	chr11	21994763	22001651	uc007idy.1_Otx1	-	764
chr11	22003001	22004000	4.38495e-06	5.1391e-05	-0.346842	chr11	21994763	22001651	uc007idz.1_Otx1	-	-1351	chr11	22005825	22286795	uc007iea.2_Ehbp1	-	1826
chr11	22711001	22712000	8.72486e-05	0.000576077	0.430102	chr11	22617407	22618487	uc007ief.1_AK087392	+	-92515	chr11	22729896	22732986	uc007ieg.1_AK078949	-	17897
chr11	22712001	22713000	3.17154e-13	1.10964e-10	-0.786483	chr11	22617407	22618487	uc007ief.1_AK087392	+	-93515	chr11	22729896	22732986	uc007ieg.1_AK078949	-	16897
chr11	22858001	22859000	1.00643e-09	7.47364e-08	0.360571	chr11	22834738	22956692	uc007iej.2_B3gnt2	-	0	chr11	22899727	22978996	uc007iek.1_Commd1	-	40728
chr11	22971001	22972000	9.98181e-07	1.57754e-05	-0.344491	chr11	22899727	22982284	uc007iel.1_Commd1	-	0	chr11	22972004	22976496	uc007iem.2_Zrsr1	+	5
chr11	22972001	22973000	2.5393e-09	1.51021e-07	-0.40492	chr11	22899727	22982284	uc007iel.1_Commd1	-	0	chr11	22972004	22976496	uc007iem.2_Zrsr1	+	0
chr11	22973001	22974000	1.12724e-07	2.84194e-06	-0.399721	chr11	22972004	22976496	uc007iem.2_Zrsr1	+	0	chr11	22990592	22999876	uc007ien.1_Cct4	+	16593
chr11	22974001	22975000	7.66526e-06	8.04971e-05	-0.25324	chr11	22972004	22976496	uc007iem.2_Zrsr1	+	0	chr11	22990592	22999876	uc007ien.1_Cct4	+	15593
chr11	23205001	23206000	1.27577e-05	0.000121586	0.279998	chr11	23019999	23030788	uc007ies.1_Fam161a	+	-174214	chr11	23256040	23297597	uc007iet.1_Xpo1	+	50041
chr11	23206001	23207000	0.000994644	0.00423136	-0.263278	chr11	23019999	23030788	uc007ies.1_Fam161a	+	-175214	chr11	23256040	23297597	uc007iet.1_Xpo1	+	49041
chr11	23259001	23260000	6.54212e-07	1.12916e-05	0.432968	chr11	23256040	23297597	uc007iet.1_Xpo1	+	0	chr11	23306894	23364512	uc011xsc.2_Usp34	+	46895
chr11	23503001	23504000	7.57365e-07	1.26805e-05	0.266588	chr11	23497756	23499192	uc007ifd.1_AK132720	+	-3810	chr11	23516202	23519195	uc007ife.1_1700093K21Rik	-	12203
chr11	23847001	23848000	0.00958275	0.0271859	0.266523	chr11	23741728	23770970	uc007ifo.1_Rel	-	-76032	chr11	23862645	23895270	uc007ifp.2_Papolg	-	14646
chr11	23958001	23959000	7.81816e-06	8.18112e-05	0.281426	chr11	23870055	23895270	uc007ifr.2_Papolg	-	-62732	chr11	24078055	24090906	uc007ifs.2_Bcl11a	+	119056
chr11	24233001	24234000	8.03309e-07	1.3305e-05	0.287335	chr11	24080694	24173558	uc007ifw.2_Bcl11a	+	-59444	chr11	24481908	24569951	uc029rkx.1_4933430M04Rik	+	247909
chr11	24294001	24295000	9.51131e-05	0.000617933	0.365084	chr11	24080694	24173558	uc007ifw.2_Bcl11a	+	-120444	chr11	24481908	24569951	uc029rkx.1_4933430M04Rik	+	186909
chr11	24297001	24298000	0.000375655	0.00190236	0.282365	chr11	24080694	24173558	uc007ifw.2_Bcl11a	+	-123444	chr11	24481908	24569951	uc029rkx.1_4933430M04Rik	+	183909
chr11	24691001	24692000	4.53804e-06	5.28786e-05	0.25004	chr11	24481908	24569951	uc029rkx.1_4933430M04Rik	+	-121051	chr11	24721005	24730722	uc011xsh.1_Gm10466	-	29006
chr11	25442001	25443000	0.000251478	0.0013676	0.264616	chr11	25326106	25367137	uc007iga.2_4933427E13Rik	+	-74865	chr11	25616845	26210576	uc011xsi.1_5730522E02Rik	-	173846
chr11	25522001	25523000	3.44814e-08	1.12462e-06	0.783268	chr11	25326106	25367137	uc007iga.2_4933427E13Rik	+	-154865	chr11	25616845	26210576	uc011xsi.1_5730522E02Rik	-	93846
chr11	25578001	25579000	6.04753e-07	1.06202e-05	0.286186	chr11	25326106	25367137	uc007iga.2_4933427E13Rik	+	-210865	chr11	25616845	26210576	uc011xsi.1_5730522E02Rik	-	37846
chr11	25855001	25856000	0.000453594	0.00222304	0.264738	chr11	25619086	26210576	uc007igb.2_5730522E02Rik	-	0	chr11	26202239	26202348	uc033fuc.1_Mir6372	+	346240
chr11	25856001	25857000	6.93297e-07	1.18184e-05	0.63344	chr11	25619086	26210576	uc007igb.2_5730522E02Rik	-	0	chr11	26202239	26202348	uc033fuc.1_Mir6372	+	345240
chr11	26054001	26055000	1.06997e-06	1.66781e-05	0.433139	chr11	25619086	26210576	uc007igb.2_5730522E02Rik	-	0	chr11	26202239	26202348	uc033fuc.1_Mir6372	+	147240
chr11	26782001	26783000	2.10023e-07	4.61327e-06	-0.426295	chr11	26545394	26593920	uc007igh.2_Vrk2	-	-188082	chr11	26785107	26787859	uc007igj.1_Gm12070	+	2108
chr11	26923001	26924000	2.49638e-06	3.28486e-05	-0.301519	chr11	26785107	26787859	uc007igj.1_Gm12070	+	-135143	chr11	28385691	28584296	uc007igk.2_Ccdc85a	-	1461692
chr11	27314001	27315000	0.00469364	0.0151444	0.268244	chr11	26785107	26787859	uc007igj.1_Gm12070	+	-526143	chr11	28385691	28584296	uc007igk.2_Ccdc85a	-	1070692
chr11	27631001	27632000	0.0104179	0.0291018	0.279727	chr11	26785107	26787859	uc007igj.1_Gm12070	+	-843143	chr11	28385691	28584296	uc007igk.2_Ccdc85a	-	753692
chr11	28117001	28118000	1.18027e-11	2.26684e-09	-0.598493	chr11	26785107	26787859	uc007igj.1_Gm12070	+	-1329143	chr11	28385691	28584296	uc007igk.2_Ccdc85a	-	267692
chr11	28584001	28585000	4.46484e-11	6.65827e-09	0.293183	chr11	28575196	28584296	uc007igm.1_Ccdc85a	-	0	chr11	28681563	28693276	uc029rkz.1_2810471M01Rik	+	96564
chr11	28651001	28652000	1.79834e-12	4.84431e-10	-0.730772	chr11	28575196	28584296	uc007igm.1_Ccdc85a	-	-66706	chr11	28681563	28693276	uc029rkz.1_2810471M01Rik	+	29564
chr11	28652001	28653000	1.50812e-07	3.57306e-06	0.452782	chr11	28575196	28584296	uc007igm.1_Ccdc85a	-	-67706	chr11	28681563	28693276	uc029rkz.1_2810471M01Rik	+	28564
chr11	28801001	28802000	1.52388e-07	3.60104e-06	-0.438421	chr11	28763727	28763835	uc011xsn.1_Mir217	+	-37167	chr11	28853204	28926743	uc007ign.2_Efemp1	+	51205
chr11	29523001	29524000	1.04433e-09	7.66452e-08	0.346648	chr11	29511756	29515033	uc007iha.2_Prorsd1	-	-7969	chr11	29526396	29545447	uc007ihc.2_Mtif2	+	2397
chr11	29911001	29912000	3.46323e-06	4.25521e-05	-0.523152	chr11	29743050	30026033	uc007ihq.1_Eml6	-	0	chr11	30099394	30219772	uc007ihs.1_Sptbn1	-	187395
chr11	30024001	30025000	9.28451e-06	9.40662e-05	0.377273	chr11	29743050	30026033	uc007ihq.1_Eml6	-	0	chr11	30099394	30219772	uc007ihs.1_Sptbn1	-	74395
chr11	30197001	30198000	2.5098e-07	5.30672e-06	0.663284	chr11	30106842	30198257	uc011xss.1_Sptbn1	-	0	chr11	30216661	30268175	uc007ihu.1_AK137356	-	18662
chr11	30226001	30227000	9.95851e-06	9.94698e-05	-0.400458	chr11	30216661	30268175	uc007ihu.1_AK137356	-	0	chr11	30426005	30471829	uc007ihv.1_4930505A04Rik	-	199006
chr11	30327001	30328000	6.62692e-10	5.40877e-08	-0.421695	chr11	30216661	30268175	uc007ihu.1_AK137356	-	-58827	chr11	30426005	30471829	uc007ihv.1_4930505A04Rik	-	98006
chr11	30649001	30650000	2.13578e-09	1.31882e-07	0.557922	chr11	30505991	30649396	uc007ihw.1_Acyp2	-	0	chr11	30771774	30880361	uc007ihx.1_Psme4	+	121775
chr11	30785001	30786000	3.41206e-07	6.7669e-06	0.27764	chr11	30771774	30880361	uc007ihx.1_Psme4	+	0	chr11	30827460	30845333	uc007ihy.1_Psme4	+	41461
chr11	30885001	30886000	1.07241e-06	1.67074e-05	0.33178	chr11	30873537	30880361	uc007iia.1_Psme4	+	-4641	chr11	30885357	30893725	uc007iib.2_Gpr75	+	0
chr11	31311001	31312000	0.00548621	0.0171873	0.25903	chr11	30954397	31102704	uc007iig.1_Asb3	+	-208298	chr11	31359440	31369103	uc007iij.1_Stc2	-	47441
chr11	31470001	31471000	1.98865e-12	5.27831e-10	-0.653701	chr11	31359440	31370061	uc007iik.1_Stc2	-	-99941	chr11	31545796	31549654	uc007iil.1_AK144695	+	74797
chr11	31745001	31746000	2.34046e-06	3.12052e-05	-0.510829	chr11	31665149	31671862	uc007iim.1_Bod1	-	-73140	chr11	31800687	31824547	uc007iin.1_D630024D03Rik	-	54688
chr11	31747001	31748000	0.000486862	0.00235549	0.355128	chr11	31665149	31671862	uc007iim.1_Bod1	-	-75140	chr11	31800687	31824547	uc007iin.1_D630024D03Rik	-	52688
chr11	31779001	31780000	1.87443e-05	0.00016521	0.292125	chr11	31665149	31671862	uc007iim.1_Bod1	-	-107140	chr11	31800687	31824547	uc007iin.1_D630024D03Rik	-	20688
chr11	32033001	32034000	5.08918e-06	5.80534e-05	-0.535185	chr11	32000458	32059202	uc007iiw.1_Nsg2	+	0	chr11	32188996	32200279	uc007iix.2_Il9r	-	154997
chr11	32034001	32035000	0.000461666	0.00225594	-0.2703	chr11	32000458	32059202	uc007iiw.1_Nsg2	+	0	chr11	32188996	32200279	uc007iix.2_Il9r	-	153997
chr11	32108001	32109000	2.20912e-06	2.97715e-05	0.378597	chr11	32000458	32059202	uc007iiw.1_Nsg2	+	-48800	chr11	32188996	32200279	uc007iix.2_Il9r	-	79997
chr11	32122001	32123000	4.77084e-05	0.000351979	-0.260168	chr11	32000458	32059202	uc007iiw.1_Nsg2	+	-62800	chr11	32188996	32200279	uc007iix.2_Il9r	-	65997
chr11	32129001	32130000	3.46309e-05	0.00027114	-0.301134	chr11	32000458	32059202	uc007iiw.1_Nsg2	+	-69800	chr11	32188996	32200279	uc007iix.2_Il9r	-	58997
chr11	32196001	32197000	2.38493e-05	0.000200534	-0.423244	chr11	32188996	32200279	uc007iiz.2_Il9r	-	0	chr11	32205414	32208995	uc007ija.2_Snrnp25	+	8415
chr11	32206001	32207000	7.78912e-06	8.15713e-05	-0.300786	chr11	32205414	32208995	uc007ija.2_Snrnp25	+	0	chr11	32209584	32222293	uc007ijb.2_Rhbdf1	-	2585
chr11	32226001	32227000	4.82975e-09	2.47348e-07	0.534399	chr11	32225627	32267707	uc007ijc.2_Nprl3	-	0	chr11	32226504	32232702	uc007ije.2_Mpg	+	0
chr11	32268001	32269000	4.55289e-84	3.96157e-80	0.595255	chr11	32231962	32267707	uc033fuh.1_Nprl3	-	-295	chr11	32276599	32278115	uc007ijj.2_Hba-x	+	7600
chr11	32441001	32442000	0.000912231	0.00394143	0.352563	chr11	32347810	32428183	uc007ijq.1_Sh3pxd2b	+	-12819	chr11	32455371	32518709	uc007ijr.1_Ubtd2	+	13372
chr11	32531001	32532000	0.000789505	0.00350563	0.401985	chr11	32522732	32527574	uc007ijs.2_Efcab9	-	-3428	chr11	32533265	32624595	uc007ijt.1_Stk10	+	1266
chr11	32691001	32692000	3.82674e-09	2.07376e-07	-0.531467	chr11	32642554	32746814	uc007ika.2_Fbxw11	+	0	chr11	32820375	32824594	uc007ikb.2_Smim23	-	128376
chr11	32942001	32943000	1.31913e-09	9.18241e-08	-0.39879	chr11	32820375	32824594	uc007ikb.2_Smim23	-	-117408	chr11	33116977	33147400	uc007ikc.2_Fgf18	-	173978
chr11	33018001	33019000	3.41368e-07	6.76878e-06	0.391593	chr11	32820375	32824594	uc007ikb.2_Smim23	-	-193408	chr11	33116977	33147400	uc007ikc.2_Fgf18	-	97978
chr11	33077001	33078000	2.92339e-06	3.72005e-05	-0.363754	chr11	32820375	32824594	uc007ikb.2_Smim23	-	-252408	chr11	33116977	33147400	uc007ikc.2_Fgf18	-	38978
chr11	33165001	33166000	8.38636e-06	8.66421e-05	-0.289666	chr11	33155327	33163206	uc007ikf.2_Npm1	-	-1796	chr11	33200751	33203588	uc007ikg.2_Tlx3	-	34752
chr11	33181001	33182000	0.0171975	0.0438094	0.261838	chr11	33155327	33163206	uc007ikf.2_Npm1	-	-17796	chr11	33200751	33203588	uc007ikg.2_Tlx3	-	18752
chr11	33203001	33204000	4.77516e-13	1.58219e-10	0.30769	chr11	33200751	33203588	uc007ikg.2_Tlx3	-	0	chr11	33211793	33513746	uc007ikh.2_Ranbp17	-	7794
chr11	33299001	33300000	1.09126e-05	0.00010716	-0.285662	chr11	33296393	33318491	uc007iki.1_Ranbp17	-	0	chr11	33328443	33513746	uc007ikj.2_Ranbp17	-	28444
chr11	33580001	33581000	2.75202e-09	1.60846e-07	-0.415438	chr11	33550780	33578957	uc007ikm.1_Gabrp	-	-1045	chr11	33607979	33625217	uc007ikn.1_AK051482	+	26980
chr11	33618001	33619000	3.32321e-09	1.86085e-07	0.720789	chr11	33607979	33625217	uc007ikn.1_AK051482	+	0	chr11	33629340	33843585	uc007iko.2_Kcnip1	-	10341
chr11	33643001	33644000	5.96676e-09	2.92103e-07	-0.429188	chr11	33629340	33993193	uc007ikr.2_Kcnip1	-	0	chr11	33963012	33973638	uc007iks.2_Kcnmb1	+	319013
chr11	33680001	33681000	3.24607e-08	1.07253e-06	0.380961	chr11	33629340	33993193	uc007ikr.2_Kcnip1	-	0	chr11	33963012	33973638	uc007iks.2_Kcnmb1	+	282013
chr11	33748001	33749000	1.7892e-05	0.000159262	-0.466774	chr11	33629340	33993193	uc007ikr.2_Kcnip1	-	0	chr11	33963012	33973638	uc007iks.2_Kcnmb1	+	214013
chr11	33749001	33750000	0.00965078	0.027346	0.281736	chr11	33629340	33993193	uc007ikr.2_Kcnip1	-	0	chr11	33963012	33973638	uc007iks.2_Kcnmb1	+	213013
chr11	33783001	33784000	6.22344e-05	0.000438104	-0.265819	chr11	33629340	33993193	uc007ikr.2_Kcnip1	-	0	chr11	33963012	33973638	uc007iks.2_Kcnmb1	+	179013
chr11	33821001	33822000	0.000113861	0.000717084	0.264539	chr11	33629340	33993193	uc007ikr.2_Kcnip1	-	0	chr11	33963012	33973638	uc007iks.2_Kcnmb1	+	141013
chr11	33924001	33925000	6.76798e-06	7.3005e-05	-0.28531	chr11	33629340	33993193	uc007ikr.2_Kcnip1	-	0	chr11	33963012	33973638	uc007iks.2_Kcnmb1	+	38013
chr11	33926001	33927000	0.000652308	0.00299546	-0.327967	chr11	33629340	33993193	uc007ikr.2_Kcnip1	-	0	chr11	33963012	33973638	uc007iks.2_Kcnmb1	+	36013
chr11	33932001	33933000	1.7033e-05	0.000153316	0.260402	chr11	33629340	33993193	uc007ikr.2_Kcnip1	-	0	chr11	33963012	33973638	uc007iks.2_Kcnmb1	+	30013
chr11	33938001	33939000	0.000426824	0.00211366	0.461801	chr11	33629340	33993193	uc007ikr.2_Kcnip1	-	0	chr11	33963012	33973638	uc007iks.2_Kcnmb1	+	24013
chr11	33962001	33963000	4.94178e-08	1.48564e-06	0.268435	chr11	33629340	33993193	uc007ikr.2_Kcnip1	-	0	chr11	33963012	33973638	uc007iks.2_Kcnmb1	+	13
chr11	33992001	33993000	3.05973e-11	4.88978e-09	0.472891	chr11	33973960	34098554	uc007ikt.1_AK015529	-	0	chr11	34047200	34090224	uc007iku.1_Lcp2	+	54201
chr11	34118001	34119000	2.89474e-07	5.9399e-06	0.449402	chr11	33973960	34098554	uc007ikt.1_AK015529	-	-19448	chr11	34194765	34194786	uc029rld.1_AB349811	+	75766
chr11	34159001	34160000	2.17366e-06	2.9349e-05	0.333791	chr11	33973960	34098554	uc007ikt.1_AK015529	-	-60448	chr11	34194765	34194786	uc029rld.1_AB349811	+	34766
[truncated: 14,521 more rows]
