# Supplementary material for: Epigenetic inheritance of circadian period in clonal cells
Source: eLife. 2020 May 27;9:e54186. doi: 10.7554/eLife.54186 (PMC7289596; doi:10.7554/eLife.54186)
Supplement: Supplementary file 1. [file elife-54186-supp1.xlsx]

## Sheet: Table S1
CHROM	POS	REF	ALT	VariantType	ID	dbSNPBuildID	SNPEFF_GENE_NAME	set	PLEF33.GT	PLEF114.GT	PLEF33.AD(REF/ALT)	PLEF114.AD(REF/ALT)	PLEF33 total count	PLEF114 total count	PLEF33.GQ	PLEF114.GQ	PLEF33 Alternate Frequency(ATL/Total)	PLEF114 Alternate Frequency(ATL/Total)	SNPEFF_EFFECT	SNPEFF_FUNCTIONAL_CLASS	SNPEFF_AMINO_ACID_CHANGE	SNPEFF_IMPACT
7	59879610	T	A	SNP			Gm23524	UNI	1/1	0/0	0/13	8/0	13	8	39	24	1	0	DOWNSTREAM	NONE		MODIFIER
1	85277469	G	C	SNP			Gm16026	Intersection	0/1	0/0	6/6	12/0	12	12	99	36	0.5	0	DOWNSTREAM	NONE		MODIFIER
5	131439297	CT	C	DELETION.NumRepetitions_10orMore.EventLength_1.RepeatExpansion_T			Auts2	HC	0/1	0/0	4/4	10/0	8	10	65	29	0.5	0	DOWNSTREAM	NONE		MODIFIER
4	119245279	G	GGGA	INSERTION.NOVEL_3			Lepre1	UNI	0/0	0/1	9/0	6/5	9	11	27	69	0	0.454545	DOWNSTREAM	NONE		MODIFIER
11	82807542	GAAAAAAAAAAAAAA	GAAAAAAAA,G,GAAAAAAAAA,GAAAAAAAAAA,GAAAAAAAAAAAAA	MULTIALLELIC_COMPLEX.Other			Lig3	HC	0/0	0/5	10/0/0/0/0/0	13/0/0/0/0/8	10	21	29	99	0	0.380952	DOWNSTREAM	NONE		MODIFIER
2	145919994	C	A	SNP			Naa20	UNI	0/0	0/1	15/0	10/6	15	16	45	99	0	0.375	DOWNSTREAM	NONE		MODIFIER
9	72174494	C	CT	INSERTION.NumRepetitions_10orMore.EventLength_1.RepeatExpansion_T		137	Gm7866	UNI	0/0	0/1	13/0	5/3	13	8	33	75	0	0.375	DOWNSTREAM	NONE		MODIFIER
10	116498466	GA	G,GAA,GAAA	MULTIALLELIC_COMPLEX.Other		137	Cnot2	HC	0/0	0/1	15/0/0/0	15/8/1/0	15	24	65	99	0	0.375	DOWNSTREAM	NONE		MODIFIER
2	174341623	CT	C	DELETION.NumRepetitions_10orMore.EventLength_1.RepeatExpansion_T			Gnas	HC	0/1	0/0	7/4	11/0	11	11	82	33	0.363636	0	DOWNSTREAM	NONE		MODIFIER
11	78347926	TG	T	DELETION.NumRepetitions_10orMore.EventLength_1.RepeatExpansion_G			Unc119	HC	0/0	0/1	10/0	6/3	10	9	20	60	0	0.333333	DOWNSTREAM	NONE		MODIFIER
19	5051942	GCACCCC	G,GCCCC	MULTIALLELIC_COMPLEX.Other	rs258042275	137	Brms1	UNI	0/2	0/0	7/0/3	9/0/0	10	9	37	27	0.3	0	DOWNSTREAM	NONE		MODIFIER
8	71667775	TGG	T,TG	MULTIALLELIC_COMPLEX.Other	rs251731463	137	Unc13a	Intersection	0/2	0/0	7/0/7	10/0/0	14	10	99	30	0.5	0	EXON	NONE		MODIFIER
19	36881854	CTTTTT	C,CTTTT	MULTIALLELIC_COMPLEX.Other	rs215725825	137	Tnks2	Intersection	0/2	0/0	4/0/4	8/0/0	8	8	80	24	0.5	0	EXON	NONE		MODIFIER
17	34189625	GCCCCC	G,GCC,GCCCC	MULTIALLELIC_COMPLEX.Other			Tap1	Intersection	0/3	0/0	7/0/0/5	14/0/0/0	12	14	99	34	0.416667	0	EXON	NONE		MODIFIER
4	146263991	G	A	SNP			Gm13168	UNI	0/1	0/0	7/4	13/0	11	13	78	36	0.363636	0	EXON	NONE		MODIFIER
5	87911695	C	G	SNP				Intersection	0/0	0/1	19/0	19/11	19	30	99	99	0	0.366667	INTERGENIC	NONE		MODIFIER
2	172444627	G	GAC	INSERTION.NOVEL_2	rs213262713	137	Rtfdc1	HC	0/0	0/1	32/0	14/18	32	32	70	99	0	0.5625	INTRON	NONE		MODIFIER
1	138080466	AAC	A,AACACAC,AACACACATACAC	MULTIALLELIC_COMPLEX.Other	rs386924015	138	Ptprc	HC	0/1	0/0	4/4/0/0	9/0/0/0	8	9	99	28	0.5	0	INTRON	NONE		MODIFIER
2	172444625	G	GTGGC,GTGAC	MULTIALLELIC_COMPLEX.Other	rs213743766	137	Rtfdc1	UNI	0/0	0/2	32/0/0	14/0/14	32	28	96	99	0	0.5	INTRON	NONE		MODIFIER
19	5748754	CGGG	C,CGG	MULTIALLELIC_COMPLEX.Other	rs234299311	137	Ltbp3	UNI	0/0	0/2	8/0/0	6/0/5	8	11	24	99	0	0.454545	INTRON	NONE		MODIFIER
2	32802713	A	C	SNP	rs261986184	137	Stxbp1	UNI	0/0	0/1	9/0	6/4	9	10	21	24	0	0.4	INTRON	NONE		MODIFIER
1	135831969	A	G	SNP	rs31428454	125	Lad1	Intersection	0/1	0/0	5/3	10/0	8	10	99	30	0.375	0	INTRON	NONE		MODIFIER
7	114245518	TAAAA	T,TAAA	MULTIALLELIC_COMPLEX.Other		138	Copb1	Intersection	0/0	0/2	8/0/0	5/0/3	8	8	41	52	0	0.375	INTRON	NONE		MODIFIER
9	113966463	CT	C	DELETION.NumRepetitions_10orMore.EventLength_1.RepeatExpansion_T			Fbxl2	UNI	0/1	0/0	5/3	14/0	8	14	44	42	0.375	0	INTRON	NONE		MODIFIER
13	119609715	A	G	SNP			Gm7120	Intersection	0/1	0/1	7/4	9/0	11	9	99	99	0.363636	0	INTRON	NONE		MODIFIER
5	123144044	T	C	SNP			Setd1b	UNI	0/0	0/1	10/0	9/5	10	14	30	62	0	0.357143	INTRON	NONE		MODIFIER
1	132600011	CCCCA	C	DELETION.NumRepetitions_1.EventLength_4	rs259797274	137	Nfasc	Intersection	0/1	0/0	6/3	8/0	9	8	32	25	0.333333	0	INTRON	NONE		MODIFIER
19	34494223	GAAAAA	G,GAAA	MULTIALLELIC_COMPLEX.Other			Lipa	HC	0/0	0/2	12/0/0	6/0/3	12	9	35	83	0	0.333333	INTRON	NONE		MODIFIER
19	7693651	AC	A	DELETION.NumRepetitions_10orMore.EventLength_1.RepeatExpansion_C			Slc22a19	UNI	0/0	0/1	14/0	13/6	14	19	42	71	0	0.315789	INTRON	NONE		MODIFIER
9	3018904	C	T	SNP			Gm10719	UNI	0/1	0/0	5/9	9/0	14	9	99	24	0.642857	0	NON_SYNONYMOUS_CODING	MISSENSE	R50C	MODERATE
3	129855102	A	G	SNP	rs16799495	123	Cfi	Intersection	0/1	0/1	11/5	18/0	16	18	99	30	0.3125	0	NON_SYNONYMOUS_CODING	MISSENSE	N212D	MODERATE
8	20639400	G	T	SNP			Gm21119	UNI	0/0	0/1	11/0	10/6	11	16	33	99	0	0.375	SYNONYMOUS_CODING	SILENT	S347	LOW
7	135683355	T	TA	INSERTION.NumRepetitions_10orMore.EventLength_1.RepeatExpansion_A			Ptpre	HC	0/1	0/0	7/4	16/0	11	16	71	49	0.363636	0	UTR_3_PRIME	NONE		MODIFIER
11	111074434	T	G	SNP	rs257371816	137	Kcnj2	UNI	0/1	0/0	7/3	10/0	10	10	20	21	0.3	0	UTR_3_PRIME	NONE		MODIFIER
