# Supplementary material for: Epigenetic inheritance of circadian period in clonal cells
Source: eLife. 2020 May 27;9:e54186. doi: 10.7554/eLife.54186 (PMC7289596; doi:10.7554/eLife.54186)
Supplement: Supplementary file 2. [file elife-54186-supp2.xlsx]

## Sheet: Sheet1
	Gene	shRNA target sequence(5'-3')
	Ak3	CGTGCCCTTTGAGGTCATTAA
	Cpa4	GCGAGGAAGATTGTAACTGAT
		GCCCATGTATGTTCTAAAGTT
	Cpeb1	GAGGCGTTCCTTGGGATATTA
	Dars	CGAGTTAAGGACCTGACAGTT
	Dnmt1	CTATCGCATCGGTCGGATAAA
		ATCTATGGAAGGTGGTATTAA
	Dnmt3a	CCAGATGTTCTTTGCCAATAA
		CGCTCCGCTGAAGGAATATTT
	Dnmt3b	GCTCTGATATTCTAATGCCAA
		CCCAAGTTGTACCCAGCAATT
	Dusp18	TCTACGAGGATATCCAGTATG
		GATCACCAAGAGCCTGTTTAT
	Eif4e2	CTACCTCCCAACACCATTATG
		TCCGCTTTCAGGAGGACATTA
	Htatip2	GTTCGTGTTGACCGAGATTAT
		TTTCCAAAGTAACGCTCATTG
	Ipo13	CCGACCAGTATGAAAGCTTAA
		CACGGACTACACAGCTGACTA
	Jun	ATTCGATCTCATTCAGTATTA
		GAAAGTCATGAACCACGTTAA
	Lrrfip1	CTGAATGCCCTCAAGTCGGCC
	Med23	AAGAGATAAGTAAGTTACATG
		AATGAAGCCCAGGTTTGTTAT
	Parvb	ACTTCTACCTGACTCCTGACA
		CAAACACCTGAATAAGCTAAA
	Rbfa	TGAACGGCCTTCTCTACAAAT
		TTGACCACGAGGCGCTGAATA
	Rftn1	CCACTGGAAAGCTGTCTTAAT
		GCAAGAACATAGTGACATTAA
	Rfx5	TAATGACTTCCCACCTATATC
		GCCAGTAAGCCACAAGTTAAT
	Slc8a3	GCACAACTACAATTCGGGTAT
		CCCAAACTAGAGGTCATCATT
	Tmem165	CAACGAACCAAACTCTTAAAT
		ATCATGGCGATGCGCTATAAC
	Trim3	GACACCAATGGAGACATTATT
		GACAGCAACAACCAATGTATT
