# Supplementary material for: Epigenetic inheritance of circadian period in clonal cells
Source: eLife. 2020 May 27;9:e54186. doi: 10.7554/eLife.54186 (PMC7289596; doi:10.7554/eLife.54186)
Supplement: Supplementary file 3. [file elife-54186-supp3.xlsx]

## Sheet: Sheet1
	Gene	Primer Sequence(5'-3')	Size(bp)
	Ak3	Forward: ACAGAAATCGGTGTGTTGGC	123
		Reverse: ATCCAACAGCCAGCTACACT
	Cpa4	Forward: GATAGAGCGGAGTGGTGACTTC	97
		Reverse: CAGCTCAGGAAAGTCTGTGGCA
	Cpeb1	Forward: TTTCAAGCCTTCGCATTTCCC	89
		Reverse: GGACCCAACGCCCATCTTTA
	Dars	Forward: GCGGCGGAAGATTATGCTAA	130
		Reverse: GGACCCAAACAACATCATCA
	Dnmt1	Forward: GTGGCAAGAAGAAAGGCAAG	96
		Reverse: ATCCGTTGTAGGACCTGTGG
	Dnmt3a	Forward: GCACCAGGGAAAGATCATGT	113
		Reverse: AGAGGTCATTGCAGGGACTG
	Dnmt3b	Forward: GGATGTTCGAGAATGTTGTGG	110
		Reverse: GTGAGCAGCAGACACCTTGA
	Dusp18	Forward: CACACTGTTGCATTGTGCTG	104
		Reverse: TCCAAGTGTGGGCATCTACA
	Eif4e2	Forward: TCTCATCCTGGCTATGCTCG	88
		Reverse: AATGTCCTCCTGAAAGCGGA
	Htatip2	Forward: GTGGAAGCCAAGGTTGAAGA	89
		Reverse: GGACGAGACTCTTGCCTGTC
	Gapdh	Forward: CAAGGAGTAAGAAACCCTGGACC	71
		Reverse: CGAGTTGGGATAGGGCCTCT
	Hprt	Forward: CTGGTGAAAAGGACCTCTCGAA	110
		Reverse: CTGAAGTACTCATTATAGTCAAGGGCAT
	Ipo13	Forward: TTCACAAGACAAGCCAGTGC	104
		Reverse: GGAGAGATGAGGGAGTGCAG
	Jun	Forward: AGAACTCGGACCTTCTCACG	107
		Reverse: TGTAGTGGTGATGTGCCCAT
	Lrrfip1	Forward: CAGGTGGACACACTGAAGGA	106
		Reverse: CATGCTTCTCCCTCTCGAAC
	Med23	Forward: TCGGAAAATCATTGGAGGAG	169
		Reverse: CAATAGGCAGGCATTTCGTT
	Parvb	Forward: CCATTCACCTTCCTGAGCAT	85
		Reverse: TCTGAGATGTGGCTGGAGTG
	Rbfa	Forward: AGAACAAGCACACGGAGTCGGT	134
		Reverse: CTCAGCCAGGACCAAGTCTCTT
	Rftn1	Forward: CATGGCCAATGATTCCTTCT	98
		Reverse: TAGCGTCATAGCCCTGTGTG
	Rfx5	Forward: CAGAAATGGGCCCAGAAGTA	83
		Reverse: CTCTGCCCAGTCACAAGTCA
	Slc8a3	Forward: AGGAGTTCTCTGTGGGCATC	84
		Reverse: CTACACGGACATTGCTCAGC
	Tmem165	Forward: TTTCAACTGCACTCTTCGCC	86
		Reverse: TAGCTCCTCCTGACCCTCAT
	Trim3	Forward: CCACCTTCCCCAGATGATGT	126
		Reverse: ATTGTCCTTCCGTTTGCCAC
	Ywhaz	Forward: TTGATCCCCAATGCTTCGC	88
		Reverse: CAGCAACCTCGGCCAAGTAA
