# Supplementary figures and images for: Epigenetic inheritance of circadian period in clonal cells
Source: eLife journal article supplement (doi:10.7554/elife.54186), 2020-05-27

# Figure 5- Figure Supplement 1

**A**

## Transcriptomes

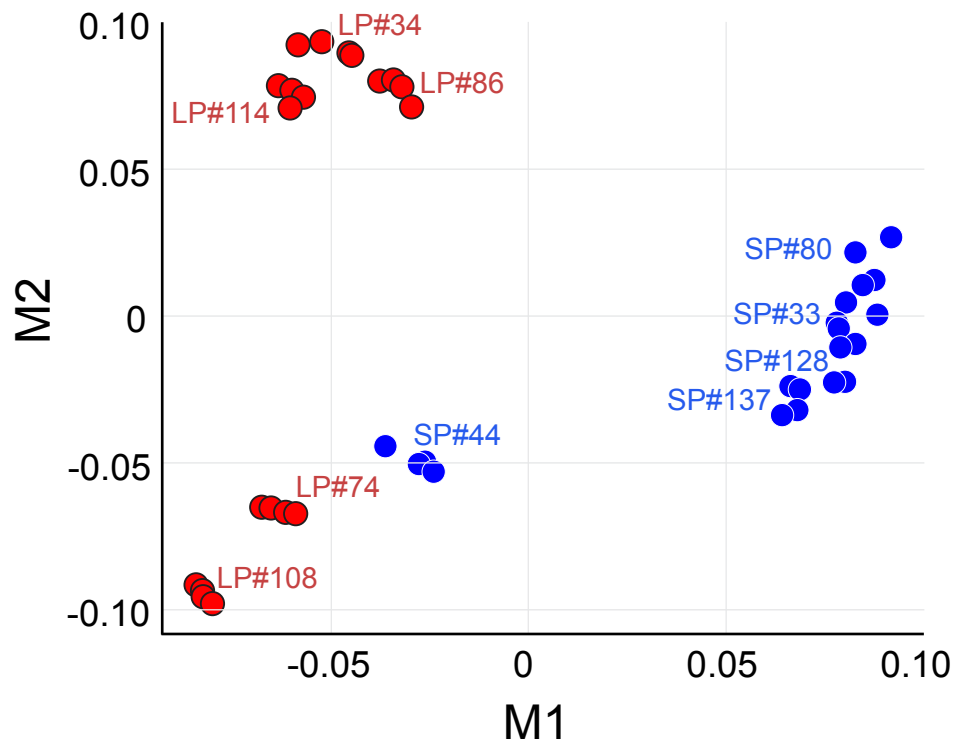

**B**

## Methylomes

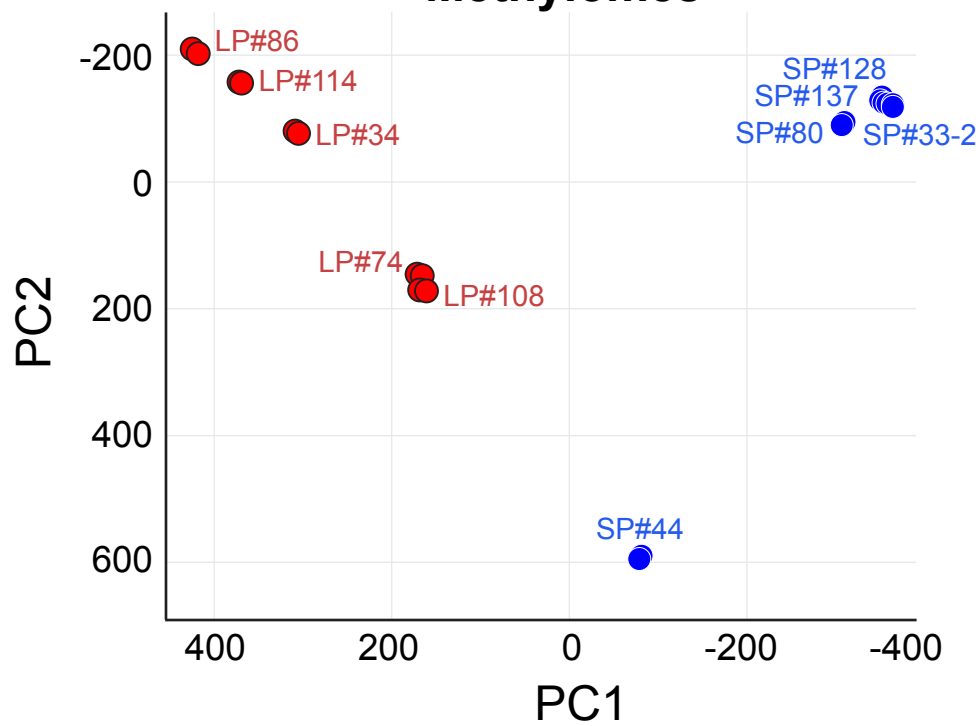

Supplement: supp [file elife-54186-supp-v1.zip]

# Figure 6- Figure Supplement 1

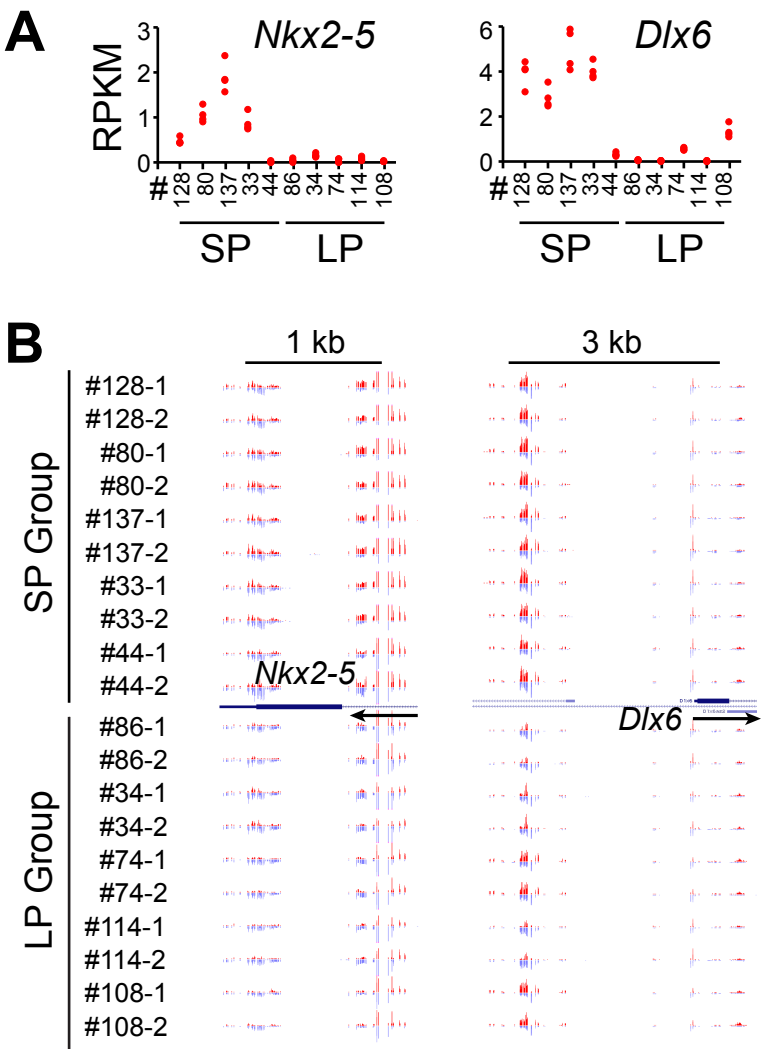

Supplement: supp [file elife-54186-supp-v1.zip]
